# Supplementary material
Source: publisher figshare collection journal article supplement (https://acs.figshare.com/ndownloader/files/5620896)
Supplement: Supplementary file 1 [file 5620896]

 
data_BP-P1
_publ_contact_author_name        'Prof. J. N. Moorthy'
_publ_contact_author_address     
;Departmet of chemistry
Indian Institute of Technology - Kanpur
Kanpur - 208 016
INDIA
;
_publ_contact_author_email       moorthy@iitk.ac.in
_publ_contact_author_phone       +91-512-2597438
_publ_contact_author_fax         +91-512-2596806
loop_
_publ_author_name
_publ_author_address
'Prof. J. N. Moorthy, '
;Departmet of chemistry
Indian Institute of Technology - Kanpur
Kanpur - 208 016
INDIA
;
'Arindam Mukhopadhyay'
;Department of Chemistry
Indian Institute of Technology
Kanpur 208 016
INDIA
; 
'Vijay Kumar Maka'
;Department of Chemistry
Indian Institute of Technology
Kanpur 208 016
INDIA
; 
_audit_creation_method            'SHELXL-2014/7'
_shelx_SHELXL_version_number      '2014/7'
_chemical_name_systematic         ?
_chemical_name_common             ?
_chemical_melting_point           '70-72 deg C'
_chemical_formula_moiety          
'C27 H30 O2 Si'
_chemical_formula_sum
 'C27 H30 O2 Si'
_chemical_formula_weight          414.60
loop_
 _atom_type_symbol
 _atom_type_description
 _atom_type_scat_dispersion_real
 _atom_type_scat_dispersion_imag
 _atom_type_scat_source
 'C'  'C'   0.0033   0.0016
 'International Tables Vol C Tables 4.2.6.8 and 6.1.1.4'
 'H'  'H'   0.0000   0.0000
 'International Tables Vol C Tables 4.2.6.8 and 6.1.1.4'
 'O'  'O'   0.0106   0.0060
 'International Tables Vol C Tables 4.2.6.8 and 6.1.1.4'
 'Si'  'Si'   0.0817   0.0704
 'International Tables Vol C Tables 4.2.6.8 and 6.1.1.4'
 
_space_group_crystal_system       triclinic
_space_group_IT_number            2
_space_group_name_H-M_alt         'P -1'
_space_group_name_Hall            '-P 1'
 
_shelx_space_group_comment
;
The symmetry employed for this shelxl refinement is uniquely defined
by the following loop, which should always be used as a source of
symmetry information in preference to the above space-group names.
They are only intended as comments.
;
 
loop_
 _space_group_symop_operation_xyz
 'x, y, z'
 '-x, -y, -z'
 
_cell_length_a                    6.2258(3)
_cell_length_b                    12.6033(5)
_cell_length_c                    15.3627(6)
_cell_angle_alpha                 106.1800(10)
_cell_angle_beta                  93.3640(10)
_cell_angle_gamma                 98.3210(10)
_cell_volume                      1139.28(8)
_cell_formula_units_Z             2
_cell_measurement_temperature     100(2)
_cell_measurement_reflns_used      150
_cell_measurement_theta_min       3
_cell_measurement_theta_max       20
 
_exptl_crystal_description        cuboidal
_exptl_crystal_colour             colorless
_exptl_crystal_density_meas       ?
_exptl_crystal_density_method     'not measured'
_exptl_crystal_density_diffrn     1.209
_exptl_crystal_F_000              444
_exptl_transmission_factor_min    ?
_exptl_transmission_factor_max    ?
_exptl_crystal_size_max           0.2
_exptl_crystal_size_mid           0.2
_exptl_crystal_size_min           0.2
_exptl_absorpt_coefficient_mu     0.124
_shelx_estimated_absorpt_T_min    ?
_shelx_estimated_absorpt_T_max    ?
_exptl_absorpt_correction_type    none
_exptl_absorpt_correction_T_min   ?
_exptl_absorpt_correction_T_max   ?
_exptl_absorpt_process_details    ?

_diffrn_ambient_temperature       100(2)
_diffrn_radiation_wavelength      0.71073
_diffrn_radiation_type            MoK\a
_diffrn_source                   	'sealed tube'
_diffrn_radiation_monochromator  	graphite
_diffrn_measurement_device_type  	'Bruker APEX-II CCD'
_diffrn_measurement_method       	'\f and \w scans'
_diffrn_detector_area_resol_mean  ?
_diffrn_reflns_number             17489
_diffrn_reflns_av_unetI/netI      0.0363
_diffrn_reflns_av_R_equivalents   0.0343
_diffrn_reflns_limit_h_min        -8
_diffrn_reflns_limit_h_max        8
_diffrn_reflns_limit_k_min        -16
_diffrn_reflns_limit_k_max        16
_diffrn_reflns_limit_l_min        -20
_diffrn_reflns_limit_l_max        20
_diffrn_reflns_theta_min          2.805
_diffrn_reflns_theta_max          28.329
_diffrn_reflns_theta_full         25.242
_diffrn_measured_fraction_theta_max   0.995
_diffrn_measured_fraction_theta_full  0.998
_diffrn_reflns_Laue_measured_fraction_max    0.995
_diffrn_reflns_Laue_measured_fraction_full   0.998
_diffrn_reflns_point_group_measured_fraction_max   0.995
_diffrn_reflns_point_group_measured_fraction_full  0.998
_reflns_number_total              5672
_reflns_number_gt                 4741
_reflns_threshold_expression      'I > 2\s(I)'
_reflns_Friedel_coverage          0.000
_reflns_Friedel_fraction_max      .
_reflns_Friedel_fraction_full     .
 
_reflns_special_details
;
 Reflections were merged by SHELXL according to the crystal
 class for the calculation of statistics and refinement.
 
 _reflns_Friedel_fraction is defined as the number of unique
 Friedel pairs measured divided by the number that would be
 possible theoretically, ignoring centric projections and
 systematic absences.
;
 
_computing_data_collection      	 'Bruker APEX2'
_computing_cell_refinement       	'Bruker SAINT'
_computing_data_reduction        	'Bruker SAINT' 

_computing_structure_refinement 'SHELXL-2014/7 (Sheldrick, 2014)'
_computing_molecular_graphics     'Ortep for Windows (Farrugia, 2012)'
_computing_publication_material   'WinGX publication routines (Farrugia, 2012)'
_refine_special_details
;
 Refined as a 2-component inversion twin.
;
_refine_ls_structure_factor_coef  Fsqd
_refine_ls_matrix_type            full
_refine_ls_weighting_scheme       calc
_refine_ls_weighting_details
'w=1/[\s^2^(Fo^2^)+(0.0500P)^2^+0.6104P] where P=(Fo^2^+2Fc^2^)/3'
_atom_sites_solution_primary      ?
_atom_sites_solution_secondary    ?
_atom_sites_solution_hydrogens    geom
_refine_ls_hydrogen_treatment     constr
_refine_ls_extinction_method      none
_refine_ls_extinction_coef        .
_refine_ls_number_reflns          5672
_refine_ls_number_parameters      277
_refine_ls_number_restraints      0
_refine_ls_R_factor_all           0.0552
_refine_ls_R_factor_gt            0.0428
_refine_ls_wR_factor_ref          0.1100
_refine_ls_wR_factor_gt           0.1027
_refine_ls_goodness_of_fit_ref    1.020
_refine_ls_restrained_S_all       1.020
_refine_ls_shift/su_max           0.002
_refine_ls_shift/su_mean          0.000
 
loop_
 _atom_site_label
 _atom_site_type_symbol
 _atom_site_fract_x
 _atom_site_fract_y
 _atom_site_fract_z
 _atom_site_U_iso_or_equiv
 _atom_site_adp_type
 _atom_site_occupancy
 _atom_site_site_symmetry_order
 _atom_site_calc_flag
 _atom_site_refinement_flags_posn
 _atom_site_refinement_flags_adp
 _atom_site_refinement_flags_occupancy
 _atom_site_disorder_assembly
 _atom_site_disorder_group
C4 C 0.5863(2) 1.26256(11) 0.52265(10) 0.0181(3) Uani 1 1 d . . . . .
C5 C 0.6368(2) 1.19591(12) 0.31553(10) 0.0190(3) Uani 1 1 d . . . . .
H5A H 0.7349 1.1461 0.3228 0.029 Uiso 1 1 calc R U . . .
H5B H 0.7188 1.2688 0.3220 0.029 Uiso 1 1 calc R U . . .
H5C H 0.5568 1.1675 0.2562 0.029 Uiso 1 1 calc R U . . .
C6 C 0.2405(2) 1.29255(12) 0.38111(11) 0.0225(3) Uani 1 1 d . . . . .
H6A H 0.1609 1.2564 0.3223 0.034 Uiso 1 1 calc R U . . .
H6B H 0.3149 1.3652 0.3821 0.034 Uiso 1 1 calc R U . . .
H6C H 0.1409 1.3006 0.4270 0.034 Uiso 1 1 calc R U . . .
O1 O 0.31306(16) 1.08044(8) 0.40194(7) 0.0187(2) Uani 1 1 d . . . . .
Si1 Si 0.44310(6) 1.20635(3) 0.40404(3) 0.01408(10) Uani 1 1 d . . . . .
C1 C 0.4212(3) 1.25873(16) 0.59245(11) 0.0343(4) Uani 1 1 d . . . . .
H1A H 0.4958 1.2866 0.6529 0.051 Uiso 1 1 calc R U . . .
H1B H 0.3503 1.1828 0.5824 0.051 Uiso 1 1 calc R U . . .
H1C H 0.3141 1.3044 0.5858 0.051 Uiso 1 1 calc R U . . .
O2 O -0.26369(15) 0.73521(8) 0.06446(6) 0.0149(2) Uani 1 1 d . . . . .
C2 C 0.7580(3) 1.19080(13) 0.53561(11) 0.0256(3) Uani 1 1 d . . . . .
H2A H 0.8282 1.2188 0.5968 0.038 Uiso 1 1 calc R U . . .
H2B H 0.8649 1.1943 0.4935 0.038 Uiso 1 1 calc R U . . .
H2C H 0.6884 1.1145 0.5246 0.038 Uiso 1 1 calc R U . . .
C3 C 0.6987(3) 1.38415(12) 0.53887(12) 0.0283(4) Uani 1 1 d . . . . .
H3A H 0.5911 1.4296 0.5324 0.042 Uiso 1 1 calc R U . . .
H3B H 0.8017 1.3869 0.4951 0.042 Uiso 1 1 calc R U . . .
H3C H 0.7736 1.4120 0.5993 0.042 Uiso 1 1 calc R U . . .
C7 C 0.2187(2) 0.99174(11) 0.32952(9) 0.0149(3) Uani 1 1 d . . . . .
C8 C -0.0042(2) 0.95233(11) 0.32423(9) 0.0158(3) Uani 1 1 d . . . . .
H8 H -0.0884 0.9893 0.3671 0.019 Uiso 1 1 calc R U . . .
C9 C -0.0997(2) 0.85806(11) 0.25500(9) 0.0148(3) Uani 1 1 d . . . . .
H9 H -0.2482 0.8316 0.2521 0.018 Uiso 1 1 calc R U . . .
C10 C 0.0228(2) 0.80186(10) 0.18933(9) 0.0132(3) Uani 1 1 d . . . . .
C11 C 0.2448(2) 0.84174(11) 0.19549(9) 0.0152(3) Uani 1 1 d . . . . .
H11 H 0.3290 0.8050 0.1525 0.018 Uiso 1 1 calc R U . . .
C13 C -0.0944(2) 0.69923(11) 0.11375(9) 0.0130(2) Uani 1 1 d . . . . .
C12 C 0.3426(2) 0.93609(11) 0.26529(10) 0.0166(3) Uani 1 1 d . . . . .
H12 H 0.4915 0.9619 0.2688 0.020 Uiso 1 1 calc R U . . .
C18 C -0.3232(2) 0.86441(12) -0.01658(10) 0.0206(3) Uani 1 1 d . . . . .
H18 H -0.4480 0.8767 0.0125 0.025 Uiso 1 1 calc R U . . .
C19 C -0.2617(3) 0.91932(13) -0.08044(11) 0.0255(3) Uani 1 1 d . . . . .
H19 H -0.3454 0.9694 -0.0935 0.031 Uiso 1 1 calc R U . . .
C20 C -0.1949(2) 0.79083(11) 0.00304(9) 0.0152(3) Uani 1 1 d . . . . .
C21 C 0.0452(3) 0.82396(13) -0.10669(10) 0.0232(3) Uani 1 1 d . . . . .
H21 H 0.1667 0.8099 -0.1377 0.028 Uiso 1 1 calc R U . . .
C22 C -0.0777(3) 0.90038(13) -0.12472(11) 0.0266(3) Uani 1 1 d . . . . .
H22 H -0.0364 0.9387 -0.1664 0.032 Uiso 1 1 calc R U . . .
C23 C -0.2139(2) 0.61128(11) 0.15314(9) 0.0138(3) Uani 1 1 d . . . . .
C24 C -0.4292(2) 0.56149(12) 0.12206(10) 0.0181(3) Uani 1 1 d . . . . .
H24 H -0.5049 0.5840 0.0782 0.022 Uiso 1 1 calc R U . . .
C25 C -0.5323(2) 0.47815(12) 0.15616(11) 0.0223(3) Uani 1 1 d . . . . .
H25 H -0.6768 0.4459 0.1354 0.027 Uiso 1 1 calc R U . . .
C26 C -0.4204(3) 0.44318(12) 0.22077(10) 0.0222(3) Uani 1 1 d . . . . .
H26 H -0.4889 0.3872 0.2433 0.027 Uiso 1 1 calc R U . . .
C27 C -0.2051(3) 0.49231(12) 0.25171(10) 0.0230(3) Uani 1 1 d . . . . .
H27 H -0.1290 0.4691 0.2951 0.028 Uiso 1 1 calc R U . . .
C28 C -0.1027(2) 0.57592(12) 0.21829(10) 0.0185(3) Uani 1 1 d . . . . .
H28 H 0.0414 0.6086 0.2396 0.022 Uiso 1 1 calc R U . . .
C16 C -0.0119(2) 0.76790(11) -0.04248(9) 0.0172(3) Uani 1 1 d . . . . .
C15 C 0.1014(2) 0.68214(11) -0.02336(9) 0.0170(3) Uani 1 1 d . . . . .
H15 H 0.2025 0.6525 -0.0613 0.020 Uiso 1 1 calc R U . . .
C14 C 0.0592(2) 0.64650(11) 0.04864(9) 0.0149(3) Uani 1 1 d . . . . .
H14 H 0.1248 0.5887 0.0590 0.018 Uiso 1 1 calc R U . . .
 
loop_
 _atom_site_aniso_label
 _atom_site_aniso_U_11
 _atom_site_aniso_U_22
 _atom_site_aniso_U_33
 _atom_site_aniso_U_23
 _atom_site_aniso_U_13
 _atom_site_aniso_U_12
C4 0.0205(7) 0.0149(6) 0.0161(7) 0.0022(5) 0.0001(5) -0.0006(5)
C5 0.0193(7) 0.0189(7) 0.0189(7) 0.0064(6) 0.0034(5) 0.0015(5)
C6 0.0203(7) 0.0211(7) 0.0261(8) 0.0062(6) 0.0018(6) 0.0044(6)
O1 0.0249(5) 0.0131(4) 0.0139(5) 0.0006(4) 0.0010(4) -0.0037(4)
Si1 0.01510(18) 0.01149(17) 0.01420(19) 0.00238(14) 0.00107(14) 0.00041(13)
C1 0.0338(9) 0.0442(10) 0.0161(8) -0.0021(7) 0.0050(7) -0.0016(8)
O2 0.0134(4) 0.0174(5) 0.0157(5) 0.0073(4) 0.0009(4) 0.0033(4)
C2 0.0318(8) 0.0227(7) 0.0224(8) 0.0088(6) -0.0054(6) 0.0042(6)
C3 0.0326(9) 0.0173(7) 0.0286(9) 0.0024(6) -0.0105(7) -0.0026(6)
C7 0.0209(7) 0.0101(6) 0.0128(6) 0.0039(5) -0.0013(5) 0.0001(5)
C8 0.0189(7) 0.0135(6) 0.0153(6) 0.0035(5) 0.0049(5) 0.0041(5)
C9 0.0130(6) 0.0139(6) 0.0177(7) 0.0051(5) 0.0019(5) 0.0019(5)
C10 0.0149(6) 0.0114(6) 0.0132(6) 0.0041(5) 0.0003(5) 0.0021(5)
C11 0.0153(6) 0.0139(6) 0.0159(6) 0.0026(5) 0.0028(5) 0.0035(5)
C13 0.0121(6) 0.0130(6) 0.0137(6) 0.0035(5) 0.0004(5) 0.0022(5)
C12 0.0142(6) 0.0148(6) 0.0201(7) 0.0050(5) 0.0015(5) 0.0003(5)
C18 0.0236(7) 0.0196(7) 0.0186(7) 0.0048(6) -0.0011(6) 0.0056(6)
C19 0.0359(9) 0.0206(7) 0.0209(7) 0.0085(6) -0.0046(6) 0.0064(6)
C20 0.0184(6) 0.0134(6) 0.0118(6) 0.0025(5) -0.0019(5) -0.0004(5)
C21 0.0271(8) 0.0245(7) 0.0160(7) 0.0050(6) 0.0036(6) -0.0012(6)
C22 0.0385(9) 0.0237(7) 0.0177(7) 0.0104(6) -0.0001(6) -0.0018(6)
C23 0.0162(6) 0.0114(6) 0.0126(6) 0.0011(5) 0.0032(5) 0.0020(5)
C24 0.0155(6) 0.0177(6) 0.0205(7) 0.0051(5) 0.0009(5) 0.0027(5)
C25 0.0181(7) 0.0186(7) 0.0286(8) 0.0056(6) 0.0050(6) -0.0008(5)
C26 0.0277(8) 0.0169(7) 0.0226(7) 0.0070(6) 0.0091(6) 0.0004(6)
C27 0.0320(8) 0.0193(7) 0.0176(7) 0.0074(6) -0.0010(6) 0.0018(6)
C28 0.0193(7) 0.0172(6) 0.0168(7) 0.0041(5) -0.0024(5) -0.0006(5)
C16 0.0201(7) 0.0156(6) 0.0133(6) 0.0019(5) 0.0001(5) -0.0004(5)
C15 0.0157(6) 0.0154(6) 0.0159(7) -0.0012(5) 0.0030(5) 0.0010(5)
C14 0.0126(6) 0.0114(6) 0.0179(7) 0.0005(5) 0.0001(5) 0.0016(5)
 
_geom_special_details
;
 All esds (except the esd in the dihedral angle between two l.s. planes)
 are estimated using the full covariance matrix.  The cell esds are taken
 into account individually in the estimation of esds in distances, angles
 and torsion angles; correlations between esds in cell parameters are only
 used when they are defined by crystal symmetry.  An approximate (isotropic)
 treatment of cell esds is used for estimating esds involving l.s. planes.
;
 
loop_
 _geom_bond_atom_site_label_1
 _geom_bond_atom_site_label_2
 _geom_bond_distance
 _geom_bond_site_symmetry_2
 _geom_bond_publ_flag
C4 C1 1.534(2) . ?
C4 C2 1.535(2) . ?
C4 C3 1.535(2) . ?
C4 Si1 1.8772(14) . ?
C5 Si1 1.8600(14) . ?
C5 H5A 0.9600 . ?
C5 H5B 0.9600 . ?
C5 H5C 0.9600 . ?
C6 Si1 1.8583(15) . ?
C6 H6A 0.9600 . ?
C6 H6B 0.9600 . ?
C6 H6C 0.9600 . ?
O1 C7 1.3684(16) . ?
O1 Si1 1.6647(10) . ?
C1 H1A 0.9600 . ?
C1 H1B 0.9600 . ?
C1 H1C 0.9600 . ?
O2 C20 1.3763(16) . ?
O2 C13 1.4578(15) . ?
C2 H2A 0.9600 . ?
C2 H2B 0.9600 . ?
C2 H2C 0.9600 . ?
C3 H3A 0.9600 . ?
C3 H3B 0.9600 . ?
C3 H3C 0.9600 . ?
C7 C12 1.3858(19) . ?
C7 C8 1.3943(19) . ?
C8 C9 1.3833(19) . ?
C8 H8 0.9300 . ?
C9 C10 1.3963(18) . ?
C9 H9 0.9300 . ?
C10 C11 1.3888(18) . ?
C10 C13 1.5312(18) . ?
C11 C12 1.3920(19) . ?
C11 H11 0.9300 . ?
C13 C14 1.5110(18) . ?
C13 C23 1.5285(18) . ?
C12 H12 0.9300 . ?
C18 C20 1.3891(19) . ?
C18 C19 1.391(2) . ?
C18 H18 0.9300 . ?
C19 C22 1.383(2) . ?
C19 H19 0.9300 . ?
C20 C16 1.396(2) . ?
C21 C22 1.388(2) . ?
C21 C16 1.398(2) . ?
C21 H21 0.9300 . ?
C22 H22 0.9300 . ?
C23 C24 1.3901(19) . ?
C23 C28 1.3917(19) . ?
C24 C25 1.3930(19) . ?
C24 H24 0.9300 . ?
C25 C26 1.384(2) . ?
C25 H25 0.9300 . ?
C26 C27 1.388(2) . ?
C26 H26 0.9300 . ?
C27 C28 1.388(2) . ?
C27 H27 0.9300 . ?
C28 H28 0.9300 . ?
C16 C15 1.4578(19) . ?
C15 C14 1.3308(19) . ?
C15 H15 0.9300 . ?
C14 H14 0.9300 . ?
 
loop_
 _geom_angle_atom_site_label_1
 _geom_angle_atom_site_label_2
 _geom_angle_atom_site_label_3
 _geom_angle
 _geom_angle_site_symmetry_1
 _geom_angle_site_symmetry_3
 _geom_angle_publ_flag
C1 C4 C2 108.61(13) . . ?
C1 C4 C3 109.26(13) . . ?
C2 C4 C3 109.32(12) . . ?
C1 C4 Si1 109.93(10) . . ?
C2 C4 Si1 109.83(10) . . ?
C3 C4 Si1 109.86(10) . . ?
Si1 C5 H5A 109.5 . . ?
Si1 C5 H5B 109.5 . . ?
H5A C5 H5B 109.5 . . ?
Si1 C5 H5C 109.5 . . ?
H5A C5 H5C 109.5 . . ?
H5B C5 H5C 109.5 . . ?
Si1 C6 H6A 109.5 . . ?
Si1 C6 H6B 109.5 . . ?
H6A C6 H6B 109.5 . . ?
Si1 C6 H6C 109.5 . . ?
H6A C6 H6C 109.5 . . ?
H6B C6 H6C 109.5 . . ?
C7 O1 Si1 129.98(9) . . ?
O1 Si1 C6 109.23(6) . . ?
O1 Si1 C5 111.34(6) . . ?
C6 Si1 C5 108.13(7) . . ?
O1 Si1 C4 103.26(6) . . ?
C6 Si1 C4 112.53(7) . . ?
C5 Si1 C4 112.30(7) . . ?
C4 C1 H1A 109.5 . . ?
C4 C1 H1B 109.5 . . ?
H1A C1 H1B 109.5 . . ?
C4 C1 H1C 109.5 . . ?
H1A C1 H1C 109.5 . . ?
H1B C1 H1C 109.5 . . ?
C20 O2 C13 116.26(10) . . ?
C4 C2 H2A 109.5 . . ?
C4 C2 H2B 109.5 . . ?
H2A C2 H2B 109.5 . . ?
C4 C2 H2C 109.5 . . ?
H2A C2 H2C 109.5 . . ?
H2B C2 H2C 109.5 . . ?
C4 C3 H3A 109.5 . . ?
C4 C3 H3B 109.5 . . ?
H3A C3 H3B 109.5 . . ?
C4 C3 H3C 109.5 . . ?
H3A C3 H3C 109.5 . . ?
H3B C3 H3C 109.5 . . ?
O1 C7 C12 121.31(12) . . ?
O1 C7 C8 118.88(12) . . ?
C12 C7 C8 119.66(12) . . ?
C9 C8 C7 119.74(12) . . ?
C9 C8 H8 120.1 . . ?
C7 C8 H8 120.1 . . ?
C8 C9 C10 121.17(12) . . ?
C8 C9 H9 119.4 . . ?
C10 C9 H9 119.4 . . ?
C11 C10 C9 118.55(12) . . ?
C11 C10 C13 123.12(12) . . ?
C9 C10 C13 118.34(11) . . ?
C10 C11 C12 120.67(12) . . ?
C10 C11 H11 119.7 . . ?
C12 C11 H11 119.7 . . ?
O2 C13 C14 109.89(10) . . ?
O2 C13 C23 105.69(10) . . ?
C14 C13 C23 109.55(10) . . ?
O2 C13 C10 107.79(10) . . ?
C14 C13 C10 112.32(11) . . ?
C23 C13 C10 111.36(11) . . ?
C7 C12 C11 120.21(12) . . ?
C7 C12 H12 119.9 . . ?
C11 C12 H12 119.9 . . ?
C20 C18 C19 118.88(14) . . ?
C20 C18 H18 120.6 . . ?
C19 C18 H18 120.6 . . ?
C22 C19 C18 120.85(14) . . ?
C22 C19 H19 119.6 . . ?
C18 C19 H19 119.6 . . ?
O2 C20 C18 117.49(12) . . ?
O2 C20 C16 120.98(12) . . ?
C18 C20 C16 121.37(13) . . ?
C22 C21 C16 120.73(14) . . ?
C22 C21 H21 119.6 . . ?
C16 C21 H21 119.6 . . ?
C19 C22 C21 119.72(14) . . ?
C19 C22 H22 120.1 . . ?
C21 C22 H22 120.1 . . ?
C24 C23 C28 118.93(12) . . ?
C24 C23 C13 121.38(12) . . ?
C28 C23 C13 119.61(12) . . ?
C23 C24 C25 120.48(13) . . ?
C23 C24 H24 119.8 . . ?
C25 C24 H24 119.8 . . ?
C26 C25 C24 120.25(14) . . ?
C26 C25 H25 119.9 . . ?
C24 C25 H25 119.9 . . ?
C25 C26 C27 119.47(13) . . ?
C25 C26 H26 120.3 . . ?
C27 C26 H26 120.3 . . ?
C28 C27 C26 120.33(14) . . ?
C28 C27 H27 119.8 . . ?
C26 C27 H27 119.8 . . ?
C27 C28 C23 120.52(13) . . ?
C27 C28 H28 119.7 . . ?
C23 C28 H28 119.7 . . ?
C20 C16 C21 118.38(13) . . ?
C20 C16 C15 117.54(12) . . ?
C21 C16 C15 124.00(13) . . ?
C14 C15 C16 119.62(13) . . ?
C14 C15 H15 120.2 . . ?
C16 C15 H15 120.2 . . ?
C15 C14 C13 120.47(12) . . ?
C15 C14 H14 119.8 . . ?
C13 C14 H14 119.8 . . ?
 
loop_
 _geom_torsion_atom_site_label_1
 _geom_torsion_atom_site_label_2
 _geom_torsion_atom_site_label_3
 _geom_torsion_atom_site_label_4
 _geom_torsion
 _geom_torsion_site_symmetry_1
 _geom_torsion_site_symmetry_2
 _geom_torsion_site_symmetry_3
 _geom_torsion_site_symmetry_4
 _geom_torsion_publ_flag
C7 O1 Si1 C6 74.95(13) . . . . ?
C7 O1 Si1 C5 -44.40(14) . . . . ?
C7 O1 Si1 C4 -165.11(12) . . . . ?
C1 C4 Si1 O1 -54.56(12) . . . . ?
C2 C4 Si1 O1 64.89(11) . . . . ?
C3 C4 Si1 O1 -174.83(10) . . . . ?
C1 C4 Si1 C6 63.09(13) . . . . ?
C2 C4 Si1 C6 -177.46(10) . . . . ?
C3 C4 Si1 C6 -57.18(12) . . . . ?
C1 C4 Si1 C5 -174.61(11) . . . . ?
C2 C4 Si1 C5 -55.16(12) . . . . ?
C3 C4 Si1 C5 65.11(12) . . . . ?
Si1 O1 C7 C12 64.82(17) . . . . ?
Si1 O1 C7 C8 -119.65(13) . . . . ?
O1 C7 C8 C9 -175.59(12) . . . . ?
C12 C7 C8 C9 0.0(2) . . . . ?
C7 C8 C9 C10 -0.7(2) . . . . ?
C8 C9 C10 C11 0.85(19) . . . . ?
C8 C9 C10 C13 -179.00(12) . . . . ?
C9 C10 C11 C12 -0.41(19) . . . . ?
C13 C10 C11 C12 179.44(12) . . . . ?
C20 O2 C13 C14 -44.85(14) . . . . ?
C20 O2 C13 C23 -162.97(10) . . . . ?
C20 O2 C13 C10 77.85(13) . . . . ?
C11 C10 C13 O2 -120.32(13) . . . . ?
C9 C10 C13 O2 59.53(14) . . . . ?
C11 C10 C13 C14 0.89(18) . . . . ?
C9 C10 C13 C14 -179.27(11) . . . . ?
C11 C10 C13 C23 124.19(13) . . . . ?
C9 C10 C13 C23 -55.97(15) . . . . ?
O1 C7 C12 C11 175.92(12) . . . . ?
C8 C7 C12 C11 0.4(2) . . . . ?
C10 C11 C12 C7 -0.2(2) . . . . ?
C20 C18 C19 C22 0.8(2) . . . . ?
C13 O2 C20 C18 -154.13(12) . . . . ?
C13 O2 C20 C16 30.34(17) . . . . ?
C19 C18 C20 O2 -178.06(12) . . . . ?
C19 C18 C20 C16 -2.6(2) . . . . ?
C18 C19 C22 C21 1.3(2) . . . . ?
C16 C21 C22 C19 -1.6(2) . . . . ?
O2 C13 C23 C24 15.41(16) . . . . ?
C14 C13 C23 C24 -102.94(14) . . . . ?
C10 C13 C23 C24 132.19(13) . . . . ?
O2 C13 C23 C28 -167.80(11) . . . . ?
C14 C13 C23 C28 73.85(15) . . . . ?
C10 C13 C23 C28 -51.01(16) . . . . ?
C28 C23 C24 C25 0.5(2) . . . . ?
C13 C23 C24 C25 177.31(13) . . . . ?
C23 C24 C25 C26 -0.7(2) . . . . ?
C24 C25 C26 C27 0.4(2) . . . . ?
C25 C26 C27 C28 0.1(2) . . . . ?
C26 C27 C28 C23 -0.3(2) . . . . ?
C24 C23 C28 C27 0.0(2) . . . . ?
C13 C23 C28 C27 -176.89(13) . . . . ?
O2 C20 C16 C21 177.57(12) . . . . ?
C18 C20 C16 C21 2.2(2) . . . . ?
O2 C20 C16 C15 0.76(19) . . . . ?
C18 C20 C16 C15 -174.60(13) . . . . ?
C22 C21 C16 C20 -0.1(2) . . . . ?
C22 C21 C16 C15 176.50(14) . . . . ?
C20 C16 C15 C14 -14.27(19) . . . . ?
C21 C16 C15 C14 169.11(13) . . . . ?
C16 C15 C14 C13 -3.78(19) . . . . ?
O2 C13 C14 C15 32.35(16) . . . . ?
C23 C13 C14 C15 148.05(12) . . . . ?
C10 C13 C14 C15 -87.64(15) . . . . ?
 
_refine_diff_density_max    0.347
_refine_diff_density_min   -0.312
_refine_diff_density_rms    0.057
 
_shelx_res_file
;
 
    shelx.res created by SHELXL-2014/7
 
TITL 7octa_0m in P-1
CELL  0.71073   6.2258  12.6033  15.3627  106.180   93.364   98.321
ZERR     1.00   0.0003   0.0005   0.0006    0.001    0.001    0.001
LATT   1
SFAC  C    H    O    SI
UNIT  54 60 4 2
MERG   2
TWIN
FMAP   2
PLAN   20
ACTA
BOND   $H
CONF
L.S.  10
WGHT    0.050000    0.610400
BASF   0.55569
FVAR       0.27995
C4    1    0.586289    1.262557    0.522647    11.00000    0.02054    0.01494 =
         0.01610    0.00222    0.00006   -0.00058
C5    1    0.636824    1.195913    0.315535    11.00000    0.01933    0.01894 =
         0.01892    0.00636    0.00338    0.00149
AFIX 137
H5A   2    0.734863    1.146074    0.322799    11.00000   -1.50000
H5B   2    0.718807    1.268784    0.321967    11.00000   -1.50000
H5C   2    0.556792    1.167493    0.256156    11.00000   -1.50000
AFIX   0
C6    1    0.240493    1.292546    0.381106    11.00000    0.02027    0.02108 =
         0.02606    0.00622    0.00180    0.00438
AFIX 137
H6A   2    0.160947    1.256413    0.322306    11.00000   -1.50000
H6B   2    0.314932    1.365197    0.382145    11.00000   -1.50000
H6C   2    0.140934    1.300557    0.427017    11.00000   -1.50000
AFIX   0
O1    3    0.313056    1.080441    0.401936    11.00000    0.02494    0.01310 =
         0.01390    0.00063    0.00099   -0.00373
SI1   4    0.443096    1.206349    0.404043    11.00000    0.01510    0.01149 =
         0.01420    0.00238    0.00107    0.00041
C1    1    0.421204    1.258728    0.592446    11.00000    0.03377    0.04423 =
         0.01607   -0.00207    0.00504   -0.00161
AFIX 137
H1A   2    0.495829    1.286620    0.652879    11.00000   -1.50000
H1B   2    0.350326    1.182804    0.582381    11.00000   -1.50000
H1C   2    0.314125    1.304363    0.585766    11.00000   -1.50000
AFIX   0
O2    3   -0.263687    0.735207    0.064464    11.00000    0.01343    0.01736 =
         0.01566    0.00726    0.00094    0.00326
C2    1    0.758028    1.190801    0.535608    11.00000    0.03179    0.02273 =
         0.02238    0.00880   -0.00536    0.00415
AFIX 137
H2A   2    0.828166    1.218773    0.596813    11.00000   -1.50000
H2B   2    0.864938    1.194253    0.493482    11.00000   -1.50000
H2C   2    0.688391    1.114497    0.524634    11.00000   -1.50000
AFIX   0
C3    1    0.698708    1.384154    0.538871    11.00000    0.03260    0.01731 =
         0.02862    0.00243   -0.01049   -0.00256
AFIX 137
H3A   2    0.591118    1.429595    0.532386    11.00000   -1.50000
H3B   2    0.801729    1.386883    0.495112    11.00000   -1.50000
H3C   2    0.773574    1.412021    0.599261    11.00000   -1.50000
AFIX   0
C7    1    0.218690    0.991744    0.329521    11.00000    0.02090    0.01011 =
         0.01280    0.00390   -0.00125    0.00014
C8    1   -0.004221    0.952329    0.324231    11.00000    0.01890    0.01349 =
         0.01533    0.00351    0.00490    0.00411
AFIX  43
H8    2   -0.088368    0.989274    0.367083    11.00000   -1.20000
AFIX   0
C9    1   -0.099721    0.858059    0.254997    11.00000    0.01295    0.01385 =
         0.01773    0.00505    0.00188    0.00190
AFIX  43
H9    2   -0.248164    0.831641    0.252134    11.00000   -1.20000
AFIX   0
C10   1    0.022808    0.801864    0.189334    11.00000    0.01491    0.01144 =
         0.01324    0.00408    0.00032    0.00210
C11   1    0.244804    0.841735    0.195492    11.00000    0.01526    0.01386 =
         0.01585    0.00261    0.00277    0.00350
AFIX  43
H11   2    0.329008    0.805024    0.152544    11.00000   -1.20000
AFIX   0
C13   1   -0.094420    0.699231    0.113745    11.00000    0.01212    0.01296 =
         0.01365    0.00351    0.00037    0.00218
C12   1    0.342555    0.936089    0.265295    11.00000    0.01425    0.01483 =
         0.02010    0.00499    0.00150    0.00027
AFIX  43
H12   2    0.491456    0.961858    0.268838    11.00000   -1.20000
AFIX   0
C18   1   -0.323152    0.864410   -0.016578    11.00000    0.02357    0.01956 =
         0.01855    0.00481   -0.00112    0.00559
AFIX  43
H18   2   -0.447991    0.876740    0.012508    11.00000   -1.20000
AFIX   0
C19   1   -0.261688    0.919319   -0.080438    11.00000    0.03592    0.02064 =
         0.02094    0.00850   -0.00459    0.00643
AFIX  43
H19   2   -0.345416    0.969428   -0.093539    11.00000   -1.20000
AFIX   0
C20   1   -0.194950    0.790831    0.003042    11.00000    0.01837    0.01342 =
         0.01178    0.00254   -0.00190   -0.00044
C21   1    0.045154    0.823958   -0.106694    11.00000    0.02710    0.02448 =
         0.01600    0.00504    0.00359   -0.00117
AFIX  43
H21   2    0.166736    0.809875   -0.137662    11.00000   -1.20000
AFIX   0
C22   1   -0.077669    0.900378   -0.124718    11.00000    0.03854    0.02373 =
         0.01771    0.01041   -0.00011   -0.00175
AFIX  43
H22   2   -0.036397    0.938689   -0.166399    11.00000   -1.20000
AFIX   0
C23   1   -0.213938    0.611284    0.153136    11.00000    0.01618    0.01141 =
         0.01259    0.00110    0.00325    0.00203
C24   1   -0.429194    0.561485    0.122058    11.00000    0.01553    0.01768 =
         0.02051    0.00513    0.00086    0.00266
AFIX  43
H24   2   -0.504942    0.583969    0.078180    11.00000   -1.20000
AFIX   0
C25   1   -0.532265    0.478150    0.156160    11.00000    0.01813    0.01857 =
         0.02861    0.00565    0.00497   -0.00083
AFIX  43
H25   2   -0.676817    0.445884    0.135445    11.00000   -1.20000
AFIX   0
C26   1   -0.420355    0.443177    0.220766    11.00000    0.02766    0.01689 =
         0.02258    0.00698    0.00907    0.00039
AFIX  43
H26   2   -0.488861    0.387212    0.243260    11.00000   -1.20000
AFIX   0
C27   1   -0.205063    0.492313    0.251708    11.00000    0.03200    0.01934 =
         0.01761    0.00741   -0.00105    0.00177
AFIX  43
H27   2   -0.129048    0.469080    0.295052    11.00000   -1.20000
AFIX   0
C28   1   -0.102697    0.575920    0.218293    11.00000    0.01934    0.01720 =
         0.01682    0.00407   -0.00237   -0.00063
AFIX  43
H28   2    0.041390    0.608581    0.239607    11.00000   -1.20000
AFIX   0
C16   1   -0.011887    0.767902   -0.042483    11.00000    0.02010    0.01557 =
         0.01326    0.00187    0.00009   -0.00038
C15   1    0.101390    0.682143   -0.023359    11.00000    0.01575    0.01544 =
         0.01590   -0.00124    0.00304    0.00103
AFIX  43
H15   2    0.202539    0.652514   -0.061257    11.00000   -1.20000
AFIX   0
C14   1    0.059231    0.646495    0.048639    11.00000    0.01262    0.01144 =
         0.01792    0.00054    0.00010    0.00157
AFIX  43
H14   2    0.124807    0.588714    0.058954    11.00000   -1.20000
AFIX   0
HKLF    4
 
REM  7octa_0m in P-1
REM R1 =  0.0428 for    4741 Fo > 4sig(Fo)  and  0.0552 for all    5672 data
REM    277 parameters refined using      0 restraints
 
END
 
WGHT      0.0500      0.6103
 
REM Highest difference peak  0.347,  deepest hole -0.312,  1-sigma level  0.057
Q1    1  -0.0317  0.7528  0.1520  11.00000  0.05    0.35
Q2    1  -0.1451  0.6561  0.1381  11.00000  0.05    0.35
Q3    1   0.5499  1.1970  0.3597  11.00000  0.05    0.33
Q4    1   0.3399  1.2596  0.3971  11.00000  0.05    0.32
Q5    1  -0.2465  0.8390 -0.0005  11.00000  0.05    0.31
Q6    1   0.0374  0.7193 -0.0378  11.00000  0.05    0.30
Q7    1  -0.0269  0.6679  0.0780  11.00000  0.05    0.30
Q8    1   0.3846  1.1375  0.4053  11.00000  0.05    0.29
Q9    1   0.2831  0.9561  0.3021  11.00000  0.05    0.29
Q10   1  -0.1720  0.5402  0.2383  11.00000  0.05    0.28
Q11   1   0.6553  1.3195  0.5332  11.00000  0.05    0.28
Q12   1   0.5024  1.2591  0.5498  11.00000  0.05    0.28
Q13   1   0.1178  0.9652  0.3276  11.00000  0.05    0.26
Q14   1  -0.0243  0.8220  0.2270  11.00000  0.05    0.25
Q15   1  -0.3197  0.5827  0.1380  11.00000  0.05    0.25
Q16   1  -0.0240  0.7752 -0.0910  11.00000  0.05    0.24
Q17   1  -0.3142  0.4753  0.2409  11.00000  0.05    0.24
Q18   1  -0.2695  0.9015 -0.0411  11.00000  0.05    0.23
Q19   1   0.1306  0.6959  0.0317  11.00000  0.05    0.22
Q20   1  -0.1002  0.7793 -0.0208  11.00000  0.05    0.22
;
_shelx_res_checksum   19026
 
_shelx_hkl_file
;
  -1   0   0    1.48    0.11
  -1   0   0    1.30    0.11
  -1   0   0    1.45    0.11
  -1   0   0    1.48    0.11
   1   0   0    1.54    0.11
   1   0   0    1.56    0.12
   1   0   0    1.61    0.11
   1   0   0    1.34    0.11
  -2   0   0    4.14    0.27
  -2   0   0    4.00    0.25
  -2   0   0    4.27    0.27
  -2   0   0    3.81    0.26
  -2   0   0    3.79    0.27
   2   0   0    4.05    0.27
   2   0   0    4.00    0.27
   2   0   0    3.96    0.25
  -3   0   0   12.54    0.65
  -3   0   0   13.51    0.63
  -3   0   0   11.70    0.62
  -3   0   0   12.72    0.64
  -3   0   0   12.92    0.65
   3   0   0   12.84    0.63
   3   0   0   12.77    0.61
  -4   0   0   33.94    1.46
  -4   0   0   33.53    1.49
  -4   0   0   36.33    1.46
   4   0   0   35.68    1.44
   4   0   0   34.09    1.47
  -5   0   0    0.27    0.18
  -5   0   0    0.34    0.21
  -5   0   0    0.33    0.24
   5   0   0    0.44    0.20
   5   0   0    0.54    0.23
  -6   0   0   31.55    1.50
  -6   0   0   31.68    1.55
  -6   0   0   32.57    1.43
   6   0   0   31.27    1.43
  -7   0   0    0.51    0.32
  -7   0   0    0.55    0.49
  -7   0   0    1.03    0.38
   7   0   0    0.39    0.32
  -8   0   0    1.82    0.61
  -8   0   0    3.56    0.60
  -8   1   0    0.19    0.44
  -8   1   0    0.11    0.52
  -7   1   0   -0.11    0.35
  -7   1   0    0.13    0.38
   6  -1   0    5.20    0.48
  -6   1   0    5.27    0.51
  -6   1   0    5.29    0.50
  -6   1   0    4.93    0.57
   5  -1   0   12.13    0.65
  -5   1   0   13.07    0.75
  -5   1   0   12.02    0.73
  -5   1   0   11.41    0.73
   4  -1   0    5.63    0.38
   4  -1   0    4.77    0.38
  -4   1   0    4.75    0.41
  -4   1   0    4.46    0.36
  -4   1   0    4.21    0.38
   3  -1   0   97.56    3.54
   3  -1   0   94.76    3.46
   3  -1   0   90.93    3.51
  -3   1   0   96.80    3.53
  -3   1   0  101.25    3.48
  -3   1   0   93.31    3.53
  -3   1   0   97.57    3.52
  -3   1   0   89.30    3.51
   2  -1   0   31.07    1.20
   2  -1   0   29.12    1.15
   2  -1   0   30.16    1.19
   2  -1   0   30.23    1.19
  -2   1   0   31.00    1.15
  -2   1   0   30.95    1.20
  -2   1   0   30.13    1.19
  -2   1   0   29.53    1.19
   1  -1   0  175.71    6.07
   1  -1   0  174.69    6.04
   1  -1   0  170.88    6.06
  -1   1   0  168.10    6.06
  -1   1   0  174.67    6.04
  -1   1   0  167.29    6.06
  -1   1   0  174.31    6.07
  -1  -1   0    9.73    0.42
  -1  -1   0    9.43    0.42
  -1  -1   0   10.33    0.40
   1   1   0    9.61    0.40
   1   1   0    9.53    0.42
   1   1   0    9.75    0.41
  -2  -1   0   12.59    0.58
  -2  -1   0   12.66    0.58
  -2  -1   0   12.57    0.56
  -2  -1   0   12.69    0.56
  -2  -1   0   11.91    0.57
   2   1   0   11.96    0.57
   2   1   0   12.45    0.56
   2   1   0   12.23    0.57
  -3  -1   0   86.70    3.14
  -3  -1   0   83.64    3.17
  -3  -1   0   81.94    3.13
  -3  -1   0   87.85    3.16
  -3  -1   0   87.84    3.15
  -3  -1   0   81.00    3.15
   3   1   0   89.90    3.16
   3   1   0   82.20    3.17
   3   1   0   78.50    3.15
  -4  -1   0   41.84    1.69
  -4  -1   0   39.85    1.66
  -4  -1   0   40.74    1.66
  -4  -1   0   39.71    1.70
   4   1   0   39.71    1.65
   4   1   0   41.04    1.68
  -5  -1   0   14.54    0.78
  -5  -1   0   12.91    0.81
  -5  -1   0   13.99    0.80
   5   1   0   14.95    0.79
   5   1   0   14.99    0.84
  -6  -1   0   42.07    1.93
  -6  -1   0   40.77    1.86
  -6  -1   0   42.47    1.82
   6   1   0   44.15    1.83
  -7  -1   0    0.38    0.38
  -7  -1   0   -0.39    0.34
  -7  -1   0    0.12    0.43
  -8  -1   0   10.16    0.91
  -8  -1   0    7.96    1.10
  -8   2   0   -0.25    0.52
  -8   2   0   -0.43    0.40
  -7   2   0   -0.12    0.36
   6  -2   0    0.13    0.21
  -6   2   0    0.64    0.24
  -6   2   0    0.32    0.28
  -6   2   0    0.54    0.29
  -5   2   0    1.27    0.27
  -5   2   0    1.08    0.27
  -5   2   0    1.26    0.28
   4  -2   0    1.21    0.20
  -4   2   0    1.14    0.21
  -4   2   0    1.42    0.22
  -4   2   0    1.38    0.21
   3  -2   0   20.23    0.92
   3  -2   0   20.12    0.83
   3  -2   0   18.25    0.89
  -3   2   0   21.11    0.83
  -3   2   0   19.95    0.90
  -3   2   0   18.98    0.88
   2  -2   0   11.96    0.55
   2  -2   0   11.74    0.57
   2  -2   0   11.83    0.51
  -2   2   0   12.23    0.50
  -2   2   0   11.74    0.55
  -2   2   0   11.43    0.54
  -2   2   0   11.54    0.55
   1  -2   0    0.02    0.04
   1  -2   0   -0.03    0.05
   1  -2   0    0.09    0.06
  -1   2   0    0.32    0.07
  -1   2   0   -0.04    0.04
   0  -2   0  226.67    7.86
   0  -2   0  224.98    7.90
   0  -2   0  225.69    7.88
   0   2   0  229.71    7.89
   0   2   0  221.87    7.90
   0   2   0  218.40    7.88
  -1  -2   0   26.82    1.06
  -1  -2   0   27.64    1.02
  -1  -2   0   27.40    1.00
  -1  -2   0   27.01    1.06
   1   2   0   27.00    1.01
   1   2   0   26.51    1.03
   1   2   0   25.86    1.06
   1   2   0   27.75    1.06
  -2  -2   0    1.06    0.18
  -2  -2   0    1.00    0.15
  -2  -2   0    0.94    0.14
  -2  -2   0    1.17    0.17
   2   2   0    1.05    0.14
   2   2   0    1.09    0.15
   2   2   0    0.97    0.16
  -3  -2   0   28.46    1.26
  -3  -2   0   28.39    1.24
  -3  -2   0   30.10    1.28
  -3  -2   0   33.00    1.25
  -3  -2   0   31.30    1.24
   3   2   0   28.28    1.26
   3   2   0   28.81    1.25
  -4  -2   0   12.44    0.71
  -4  -2   0   13.09    0.70
  -4  -2   0   14.10    0.73
   4   2   0   12.99    0.74
   4   2   0   13.59    0.72
   4   2   0   13.14    0.71
  -5  -2   0    4.39    0.51
  -5  -2   0    3.66    0.44
  -5  -2   0    4.12    0.43
   5   2   0    3.94    0.42
   5   2   0    4.52    0.45
  -6  -2   0   47.46    2.07
  -6  -2   0   48.10    2.07
  -6  -2   0   46.82    2.16
   6   2   0   49.29    2.07
   6   2   0   51.10    2.13
  -7  -2   0   12.38    1.02
  -7  -2   0   12.22    0.93
  -7  -2   0   13.83    0.91
  -8   3   0   -0.37    0.49
  -8   3   0   -0.09    0.47
  -7   3   0    4.68    0.67
  -7   3   0    3.96    0.68
   6  -3   0    0.61    0.22
  -6   3   0    0.70    0.30
  -6   3   0    0.21    0.30
   5  -3   0   26.21    1.09
  -5   3   0   25.57    1.11
  -5   3   0   23.09    1.17
  -5   3   0   24.45    1.20
   4  -3   0    9.63    0.52
  -4   3   0   11.39    0.54
  -4   3   0    9.65    0.57
  -4   3   0    8.82    0.58
   3  -3   0   12.56    0.66
   3  -3   0   11.55    0.62
   3  -3   0   12.57    0.55
  -3   3   0   10.84    0.58
  -3   3   0   10.69    0.59
  -3   3   0   12.05    0.53
   2  -3   0    1.99    0.21
   2  -3   0    1.89    0.22
  -2   3   0    1.89    0.15
  -2   3   0    1.82    0.19
  -2   3   0    1.94    0.22
  -2   3   0    2.11    0.21
   1  -3   0   68.37    2.37
   1  -3   0   66.37    2.39
   1  -3   0   63.95    2.36
  -1   3   0   63.76    2.36
  -1   3   0   64.31    2.38
  -1   3   0   66.51    2.37
   0  -3   0  162.63    5.62
   0  -3   0  160.40    5.58
   0  -3   0  159.15    5.65
   0   3   0  153.76    5.57
   0   3   0  160.48    5.65
  -1  -3   0   55.35    1.95
  -1  -3   0   54.53    1.99
  -1  -3   0   54.21    2.05
   1   3   0   55.04    2.06
   1   3   0   54.15    2.00
   1   3   0   53.54    1.96
  -2  -3   0   44.34    1.68
  -2  -3   0   44.87    1.77
  -2  -3   0   46.73    1.71
  -2  -3   0   42.88    1.76
   2   3   0   42.92    1.74
   2   3   0   46.70    1.78
   2   3   0   45.95    1.71
  -3  -3   0    0.22    0.20
  -3  -3   0    0.02    0.13
  -3  -3   0   -0.02    0.13
  -3  -3   0    0.06    0.15
   3   3   0    0.22    0.12
   3   3   0    0.11    0.12
   3   3   0    0.10    0.15
  -4  -3   0   29.08    1.35
  -4  -3   0   28.53    1.28
  -4  -3   0   29.43    1.33
   4   3   0   31.26    1.31
   4   3   0   29.72    1.39
   4   3   0   29.96    1.33
  -5  -3   0    0.26    0.22
  -5  -3   0    0.36    0.22
  -5  -3   0    0.11    0.25
   5   3   0    0.43    0.26
   5   3   0    0.00    0.22
   5   3   0    0.24    0.21
  -6  -3   0    0.27    0.28
  -6  -3   0    0.00    0.35
  -6  -3   0    0.55    0.32
   6   3   0    0.84    0.31
  -7  -3   0   -0.09    0.39
  -7  -3   0    0.91    0.50
  -7  -3   0    0.05    0.39
  -8   4   0    6.27    0.92
  -8   4   0    6.28    0.85
  -7   4   0    0.25    0.36
  -7   4   0   -0.23    0.32
   6  -4   0    5.14    0.56
  -6   4   0    6.18    0.55
  -6   4   0    5.23    0.57
   5  -4   0   42.65    1.68
  -5   4   0   40.18    1.80
  -5   4   0   40.86    1.80
  -5   4   0   44.42    1.67
   4  -4   0   95.93    3.42
  -4   4   0   86.93    3.50
  -4   4   0   98.67    3.39
  -4   4   0   90.03    3.51
   3  -4   0  148.68    5.47
   3  -4   0  155.53    5.37
  -3   4   0  140.22    5.42
  -3   4   0  147.82    5.44
  -3   4   0  158.11    5.35
   2  -4   0   27.31    1.06
   2  -4   0   27.41    1.10
   2  -4   0   27.27    1.12
  -2   4   0   26.64    1.08
  -2   4   0   26.78    1.04
  -2   4   0   26.47    1.09
  -2   4   0   26.22    1.09
   1  -4   0    0.58    0.10
   1  -4   0    0.49    0.09
   1  -4   0    0.63    0.11
  -1   4   0    0.67    0.09
  -1   4   0    0.71    0.11
  -1   4   0    0.93    0.13
   0  -4   0   20.97    0.91
   0  -4   0   22.47    0.88
   0  -4   0   22.65    0.83
   0   4   0   22.25    0.92
   0   4   0   22.19    0.87
   0   4   0   22.42    0.82
  -1  -4   0  180.67    6.43
  -1  -4   0  176.28    6.29
  -1  -4   0  183.39    6.44
  -1  -4   0  180.03    6.35
   1   4   0  183.48    6.44
   1   4   0  175.51    6.31
   1   4   0  175.57    6.37
  -2  -4   0   10.90    0.64
  -2  -4   0   12.38    0.56
  -2  -4   0   11.34    0.62
  -2  -4   0   12.23    0.51
   2   4   0   11.79    0.54
   2   4   0   10.06    0.55
  -3  -4   0    7.79    0.47
  -3  -4   0    7.50    0.52
   3   4   0    8.94    0.54
   3   4   0    8.63    0.55
   3   4   0    8.44    0.48
  -4  -4   0    6.46    0.52
  -4  -4   0    6.44    0.55
  -4  -4   0    6.72    0.47
   4   4   0    6.66    0.49
   4   4   0    7.03    0.55
   4   4   0    6.96    0.53
  -5  -4   0   26.56    1.28
  -5  -4   0   27.33    1.36
  -5  -4   0   28.81    1.41
   5   4   0   28.15    1.39
   5   4   0   28.05    1.31
  -6  -4   0   12.01    0.80
  -6  -4   0   10.12    0.76
  -6  -4   0   10.13    0.87
   6   4   0   10.89    0.83
   6   4   0   12.66    0.95
  -7  -4   0   17.11    1.20
  -7  -4   0   16.88    1.09
  -7  -4   0   15.72    1.23
  -8   5   0    0.34    0.48
  -8   5   0   -0.62    0.46
  -7   5   0    1.53    0.38
  -7   5   0    1.20    0.40
   6  -5   0    0.06    0.27
  -6   5   0    0.12    0.29
  -6   5   0   -0.04    0.28
   5  -5   0  161.72    5.61
  -5   5   0  150.18    5.74
  -5   5   0  150.89    5.74
  -5   5   0  156.74    5.56
   4  -5   0   17.75    0.77
  -4   5   0   17.51    0.74
  -4   5   0   15.78    0.82
  -4   5   0   15.56    0.82
   3  -5   0    7.48    0.41
  -3   5   0    6.69    0.42
  -3   5   0    7.35    0.45
  -3   5   0    7.33    0.39
   2  -5   0   45.16    1.77
   2  -5   0   46.34    1.74
   2  -5   0   44.27    1.71
  -2   5   0   44.35    1.71
  -2   5   0   46.89    1.71
  -2   5   0   42.79    1.73
   1  -5   0   35.52    1.36
   1  -5   0   33.97    1.35
   1  -5   0   34.61    1.31
  -1   5   0   33.68    1.35
  -1   5   0   34.38    1.34
  -1   5   0   35.03    1.30
   0  -5   0   46.35    1.73
   0  -5   0   45.52    1.77
   0  -5   0   46.63    1.67
   0   5   0   45.00    1.65
   0   5   0   46.67    1.79
   0   5   0   44.98    1.72
  -1  -5   0   57.93    1.98
  -1  -5   0   56.93    2.06
  -1  -5   0   53.37    2.14
   1   5   0   51.24    2.08
   1   5   0   55.97    2.00
  -2  -5   0    5.88    0.43
  -2  -5   0    6.25    0.31
   2   5   0    5.50    0.39
   2   5   0    6.04    0.35
  -3  -5   0    0.99    0.18
  -3  -5   0    0.59    0.21
   3   5   0    1.16    0.22
   3   5   0    0.84    0.17
  -4  -5   0    1.86    0.30
  -4  -5   0    1.55    0.26
   4   5   0    1.39    0.26
   4   5   0    2.10    0.34
  -5  -5   0   -0.20    0.27
  -5  -5   0    0.25    0.29
  -5  -5   0    0.31    0.23
   5   5   0    0.47    0.27
   5   5   0   -0.06    0.30
  -6  -5   0    2.22    0.59
  -6  -5   0    1.60    0.37
   6   5   0    2.20    0.58
   6   5   0    1.79    0.39
  -7  -5   0    1.02    0.46
  -7  -5   0    0.31    0.59
  -7  -5   0    1.01    0.49
  -8   6   0    0.32    0.51
  -8   6   0    0.52    0.50
  -7   6   0    2.80    0.47
  -7   6   0    3.72    0.50
  -6   6   0    1.15    0.32
  -6   6   0    1.12    0.30
   5  -6   0    2.64    0.37
  -5   6   0    2.31    0.32
  -5   6   0    2.04    0.33
  -5   6   0    1.47    0.29
   4  -6   0   65.10    2.39
  -4   6   0   61.65    2.46
  -4   6   0   63.20    2.34
  -4   6   0   61.40    2.47
   3  -6   0   10.93    0.56
  -3   6   0   10.56    0.58
  -3   6   0   10.81    0.59
  -3   6   0   12.09    0.56
   2  -6   0    2.11    0.28
   2  -6   0    2.61    0.25
  -2   6   0    2.60    0.25
  -2   6   0    2.61    0.21
  -2   6   0    2.72    0.26
   1  -6   0   -0.12    0.10
   1  -6   0   -0.05    0.13
   1  -6   0    0.11    0.10
  -1   6   0    0.01    0.07
  -1   6   0   -0.05    0.09
  -1   6   0   -0.15    0.15
   0  -6   0   13.69    0.65
   0  -6   0   14.67    0.58
   0  -6   0   13.89    0.69
   0  -6   0   14.31    0.72
   0   6   0   14.69    0.72
   0   6   0   13.43    0.63
   0   6   0   14.11    0.56
  -1  -6   0  120.32    4.09
  -1  -6   0  110.62    4.28
   1   6   0  112.82    4.20
   1   6   0  117.91    4.11
  -2  -6   0    5.69    0.48
  -2  -6   0    6.56    0.33
   2   6   0    6.96    0.38
   2   6   0    5.96    0.42
  -3  -6   0   19.91    0.83
  -3  -6   0   18.99    1.01
   3   6   0   19.46    0.88
   3   6   0   19.21    0.96
  -4  -6   0   72.38    2.96
   4   6   0   73.59    2.82
   4   6   0   72.73    2.94
  -5  -6   0    1.45    0.29
  -5  -6   0    1.15    0.36
  -5  -6   0    0.69    0.36
   5   6   0    0.95    0.31
   5   6   0    1.20    0.39
  -6  -6   0    0.53    0.35
  -6  -6   0    0.71    0.40
  -6  -6   0    0.83    0.48
   6   6   0   -0.20    0.38
   6   6   0    0.01    0.46
  -7  -6   0   18.37    1.45
  -7  -6   0   19.94    1.24
  -7  -6   0   18.86    1.28
  -7   7   0    0.54    0.37
  -7   7   0    0.83    0.41
  -6   7   0   57.89    2.47
  -6   7   0   59.69    2.48
   5  -7   0   14.25    0.74
  -5   7   0   13.61    0.80
  -5   7   0   13.94    0.83
   4  -7   0   37.27    1.50
  -4   7   0   36.61    1.55
  -4   7   0   36.76    1.46
  -4   7   0   36.14    1.57
   3  -7   0    0.19    0.14
  -3   7   0    0.21    0.14
  -3   7   0    0.21    0.17
  -3   7   0    0.20    0.13
   2  -7   0   38.27    1.59
   2  -7   0   41.59    1.59
  -2   7   0   39.12    1.53
  -2   7   0   41.91    1.60
  -2   7   0   37.39    1.58
   1  -7   0   39.34    1.45
   1  -7   0   34.76    1.50
  -1   7   0   37.16    1.53
  -1   7   0   36.01    1.47
  -1   7   0   39.06    1.41
   0  -7   0   20.56    0.78
   0  -7   0   18.31    0.90
   0   7   0   18.62    0.84
   0   7   0   19.41    0.75
  -1  -7   0   60.21    2.50
  -1  -7   0   67.56    2.29
   1   7   0   60.29    2.40
   1   7   0   64.36    2.31
  -2  -7   0   -0.03    0.19
  -2  -7   0   -0.08    0.09
   2   7   0    0.11    0.13
   2   7   0   -0.01    0.13
  -3  -7   0   15.73    0.69
  -3  -7   0   15.58    0.90
   3   7   0   14.12    0.81
   3   7   0   15.35    0.75
  -4  -7   0    0.04    0.28
   4   7   0    0.01    0.21
   4   7   0    0.37    0.29
  -5  -7   0    1.14    0.31
  -5  -7   0    1.24    0.38
   5   7   0    0.91    0.41
   5   7   0    1.40    0.35
  -6  -7   0    2.28    0.46
  -6  -7   0    2.88    0.46
  -6  -7   0    2.88    0.60
   6   7   0    2.52    0.50
   6   7   0    2.03    0.61
  -7   8   0   13.35    0.97
  -7   8   0   14.42    0.99
  -6   8   0    8.21    0.70
  -6   8   0    8.14    0.68
   5  -8   0    6.22    0.52
  -5   8   0    7.13    0.56
  -5   8   0    7.27    0.58
   4  -8   0   32.34    1.38
  -4   8   0   34.53    1.47
  -4   8   0   34.08    1.43
  -4   8   0   31.69    1.37
   3  -8   0    5.63    0.40
  -3   8   0    5.17    0.40
  -3   8   0    4.70    0.35
  -3   8   0    5.29    0.45
   2  -8   0    0.23    0.13
  -2   8   0    0.26    0.12
  -2   8   0    0.16    0.11
   1  -8   0    0.02    0.13
   1  -8   0    0.32    0.15
  -1   8   0   -0.02    0.08
  -1   8   0    0.13    0.11
   0  -8   0   32.42    1.46
   0  -8   0   35.80    1.31
   0   8   0   35.04    1.28
   0   8   0   32.91    1.39
  -1  -8   0    2.88    0.36
  -1  -8   0    2.90    0.22
   1   8   0    2.84    0.31
   1   8   0    2.87    0.23
  -2  -8   0   63.73    2.63
  -2  -8   0   65.82    2.35
   2   8   0   67.23    2.42
   2   8   0   60.58    2.52
  -3  -8   0    0.26    0.26
   3   8   0    0.45    0.19
   3   8   0    0.70    0.27
  -4  -8   0    1.90    0.45
   4   8   0    2.97    0.40
   4   8   0    2.44    0.42
  -5  -8   0    6.07    0.75
  -5  -8   0    6.90    0.62
   5   8   0    5.97    0.81
   5   8   0    6.09    0.69
  -6  -8   0    1.41    0.47
  -6  -8   0    2.83    1.06
   6   8   0    1.52    0.59
  -7   9   0    1.92    0.43
  -7   9   0    1.44    0.47
  -6   9   0    0.27    0.33
  -6   9   0   -0.10    0.33
   5  -9   0    5.26    0.52
  -5   9   0    6.50    0.55
  -5   9   0    5.79    0.53
   4  -9   0   -0.44    0.20
  -4   9   0    0.21    0.15
  -4   9   0    0.12    0.18
   3  -9   0    8.13    0.53
  -3   9   0    8.94    0.50
  -3   9   0    7.89    0.53
   2  -9   0   31.50    1.37
  -2   9   0   31.25    1.35
  -2   9   0   32.89    1.28
   1  -9   0   11.29    0.67
   1  -9   0   12.02    0.61
  -1   9   0   11.28    0.60
  -1   9   0   11.39    0.52
   0  -9   0    1.24    0.26
   0  -9   0    1.70    0.24
   0   9   0    1.92    0.19
   0   9   0    1.86    0.23
  -1  -9   0    2.04    0.24
  -1  -9   0    2.13    0.33
   1   9   0    2.11    0.23
   1   9   0    2.01    0.29
  -2  -9   0   33.20    1.58
  -2  -9   0   33.25    1.28
   2   9   0   34.20    1.48
   2   9   0   32.54    1.34
  -3  -9   0    2.47    0.40
   3   9   0    2.88    0.41
   3   9   0    2.70    0.38
  -4  -9   0   21.67    1.27
   4   9   0   20.69    1.21
   4   9   0   20.65    1.03
  -5  -9   0    7.30    0.85
   5   9   0    7.21    0.92
  -6  -9   0    3.63    0.64
  -6  -9   0    5.32    0.78
   6   9   0    4.18    0.76
  -7  10   0    0.10    0.41
  -7  10   0   -0.14    0.41
  -6  10   0   -0.05    0.33
  -6  10   0   -0.66    0.31
   5 -10   0    0.12    0.27
  -5  10   0    0.09    0.26
  -5  10   0    0.23    0.28
   4 -10   0    1.60    0.29
  -4  10   0    1.81    0.30
  -4  10   0    1.73    0.29
   3 -10   0    0.02    0.20
  -3  10   0    0.10    0.15
  -3  10   0    0.29    0.19
   2 -10   0    4.41    0.44
  -2  10   0    4.50    0.37
  -2  10   0    5.03    0.33
   1 -10   0    0.23    0.19
  -1  10   0   -0.05    0.15
  -1  10   0    0.25    0.11
   0 -10   0   22.52    1.14
   0 -10   0   22.63    0.95
   0  10   0   21.97    0.89
   0  10   0   22.54    1.05
  -1 -10   0    0.36    0.25
  -1 -10   0    0.48    0.17
   1  10   0    0.47    0.14
   1  10   0    0.63    0.20
  -2 -10   0    2.84    0.42
   2  10   0    2.40    0.34
   2  10   0    2.26    0.32
  -3 -10   0   44.16    2.05
   3  10   0   42.09    2.33
   3  10   0   44.65    1.77
  -4 -10   0    0.52    0.40
   4  10   0    1.11    0.40
  -5 -10   0   -0.20    0.45
   5  10   0   -0.23    0.51
  -6  11   0    7.69    0.75
  -6  11   0    6.84    0.72
  -5  11   0   14.58    0.91
  -5  11   0   14.15    0.85
   4 -11   0    5.52    0.54
  -4  11   0    5.61    0.48
  -4  11   0    6.29    0.52
   3 -11   0   17.27    0.93
  -3  11   0   17.64    0.90
  -3  11   0   17.03    0.82
   2 -11   0    7.54    0.57
  -2  11   0    6.99    0.54
  -2  11   0    7.79    0.45
   1 -11   0    3.56    0.42
  -1  11   0    3.14    0.26
  -1  11   0    3.36    0.35
   0 -11   0    3.80    0.50
   0  11   0    4.59    0.40
   0  11   0    3.65    0.28
  -1 -11   0   12.31    0.79
   1  11   0   11.37    0.72
   1  11   0   10.83    0.56
  -2 -11   0    1.42    0.38
   2  11   0    1.31    0.55
   2  11   0    1.72    0.25
  -3 -11   0    3.06    0.51
   3  11   0    2.73    0.47
  -4 -11   0   24.15    1.48
   4  11   0   26.64    1.49
  -5 -11   0    3.64    0.68
   5  11   0    3.47    0.68
  -6  12   0   10.46    0.78
  -6  12   0    8.92    0.86
  -5  12   0    6.60    0.67
  -5  12   0    7.24    0.62
   4 -12   0    0.07    0.31
  -4  12   0   -0.42    0.21
  -4  12   0    0.37    0.27
   3 -12   0    1.11    0.29
  -3  12   0    0.62    0.23
  -3  12   0    0.42    0.20
   2 -12   0   15.67    0.94
  -2  12   0   17.45    0.77
  -2  12   0   16.68    0.88
   1 -12   0    1.44    0.31
  -1  12   0    1.77    0.23
   0 -12   0    5.17    0.59
   0  12   0    3.88    0.32
   0  12   0    4.96    0.49
  -1 -12   0    8.69    0.75
   1  12   0    6.79    0.46
   1  12   0    6.09    0.61
  -2 -12   0    6.30    0.73
   2  12   0    5.77    0.64
  -3 -12   0    4.12    0.65
   3  12   0    3.60    0.59
  -4 -12   0    0.74    0.55
   4  12   0    0.77    0.51
  -5  13   0   14.58    0.91
  -5  13   0   16.81    1.01
   4 -13   0    7.29    0.73
  -4  13   0    7.91    0.69
  -4  13   0    7.84    0.58
   3 -13   0    1.83    0.40
  -3  13   0    0.78    0.33
  -3  13   0    1.04    0.23
   2 -13   0   18.78    1.09
  -2  13   0   17.11    0.99
  -2  13   0   19.36    0.84
   1 -13   0    2.21    0.64
  -1  13   0    2.88    0.41
  -1  13   0    2.43    0.29
   0 -13   0    0.16    0.34
   0  13   0    0.59    0.29
  -1 -13   0   11.07    0.93
   1  13   0   10.77    0.77
  -2 -13   0    7.39    0.86
   2  13   0    6.28    0.67
  -3 -13   0    2.23    0.55
  -5  14   0    2.26    0.50
  -5  14   0    1.64    0.39
  -4  14   0    3.20    0.41
  -4  14   0    3.86    0.52
  -3  14   0    0.46    0.32
  -3  14   0    0.29    0.24
   2 -14   0    0.19    0.37
  -2  14   0   -0.07    0.30
  -2  14   0    0.63    0.21
   1 -14   0    2.14    0.48
  -1  14   0    2.28    0.38
   0 -14   0   17.83    1.13
   0  14   0   15.48    0.96
  -1 -14   0    3.01    0.55
   1  14   0    3.41    0.52
  -2 -14   0    1.43    0.56
   2  14   0    1.87    0.52
  -4  15   0    0.57    0.42
  -4  15   0    0.31    0.33
   3 -15   0    4.92    0.75
  -3  15   0    4.50    0.58
   2 -15   0    5.65    0.80
  -2  15   0    7.28    0.67
   1 -15   0    1.43    0.46
  -1  15   0    2.48    0.41
   0 -15   0   10.44    0.96
   0  15   0   10.58    0.83
  -1 -15   0   35.71    1.96
   1  15   0   35.75    1.81
   2 -16   0    1.80    0.58
  -2  16   0    1.73    0.41
   1 -16   0    1.34    0.56
  -1  16   0    2.15    0.47
   0  16  -1    0.19    0.47
   0 -16   1    0.39    0.53
  -1  16  -1    1.46    0.46
   1 -16   1    1.03    0.55
  -2  16  -1    6.93    0.75
   2 -16   1    8.36    0.91
  -3  16  -1    2.41    0.50
   3 -16   1    2.18    0.62
   2  15  -1   27.14    1.64
  -2 -15   1   31.03    1.79
   1  15  -1    2.03    0.48
  -1 -15   1    3.43    0.60
   0  15  -1    2.61    0.48
   0 -15   1    1.88    0.54
  -1  15  -1    5.84    0.66
   1 -15   1    4.95    0.78
  -2  15  -1    0.01    0.33
   2 -15   1    0.38    0.44
  -3  15  -1    1.73    0.39
  -3  15  -1    1.77    0.31
   3 -15   1    1.09    0.49
  -4  15  -1   12.44    0.81
  -4  15  -1   13.35    0.95
   3  14  -1   -0.25    0.55
  -3 -14   1   -0.03    0.56
   2  14  -1    5.04    0.68
  -2 -14   1    5.62    0.76
   1  14  -1   21.57    1.28
  -1 -14   1   22.63    1.38
   0  14  -1    0.64    0.32
   0 -14   1    0.48    0.42
  -1  14  -1    0.24    0.19
  -1  14  -1    0.37    0.29
   1 -14   1    0.36    0.35
  -2  14  -1    6.32    0.45
  -2  14  -1    4.42    0.57
   2 -14   1    5.05    0.72
  -3  14  -1   57.90    2.41
  -3  14  -1   59.12    2.27
   3 -14   1   56.10    2.70
  -4  14  -1    0.39    0.28
  -4  14  -1    0.09    0.34
   4 -14   1   -0.29    0.44
  -5  14  -1   -0.45    0.37
  -5  14  -1    0.10    0.35
   3  13  -1    5.68    0.77
  -3 -13   1    6.68    0.90
   2  13  -1    9.15    0.80
  -2 -13   1    9.11    0.84
   1  13  -1   19.11    1.09
  -1 -13   1   20.86    1.23
   0  13  -1    4.07    0.51
   0  13  -1    2.98    0.34
   0 -13   1    4.17    0.60
  -1  13  -1    0.11    0.25
  -1  13  -1   -0.33    0.16
  -2  13  -1    9.92    0.56
  -2  13  -1   10.25    0.68
   2 -13   1    9.77    0.77
  -3  13  -1    8.80    0.58
  -3  13  -1    9.56    0.65
   3 -13   1    9.71    0.79
  -4  13  -1   10.77    0.69
  -4  13  -1   11.14    0.76
   4 -13   1   10.36    0.86
  -5  13  -1   11.21    0.84
  -5  13  -1   11.69    0.77
  -6  13  -1    0.80    0.42
  -6  13  -1    0.37    0.41
   4  12  -1    3.64    0.61
  -4 -12   1    2.58    0.56
   3  12  -1   -0.49    0.34
  -3 -12   1   -0.53    0.38
   2  12  -1    2.64    0.44
   2  12  -1    2.52    0.44
  -2 -12   1    1.99    0.46
   1  12  -1    0.48    0.24
   1  12  -1    0.44    0.18
  -1 -12   1    0.60    0.33
   0  12  -1    9.51    0.50
   0 -12   1    8.84    0.70
  -1  12  -1    0.52    0.22
  -1  12  -1    0.46    0.13
   1 -12   1    0.28    0.25
  -2  12  -1    0.35    0.16
   2 -12   1    0.51    0.28
  -3  12  -1    2.33    0.36
  -3  12  -1    2.06    0.26
   3 -12   1    2.11    0.36
  -4  12  -1    5.40    0.47
  -4  12  -1    5.14    0.49
   4 -12   1    5.08    0.60
  -5  12  -1    0.21    0.30
  -5  12  -1    0.48    0.32
  -6  12  -1   14.43    0.92
  -6  12  -1   13.23    0.96
   5  11  -1    1.34    0.61
  -5 -11   1    1.63    0.55
   4  11  -1    1.85    0.46
  -4 -11   1    1.72    0.49
   3  11  -1   -0.17    0.27
   3  11  -1   -0.41    0.36
  -3 -11   1   -0.17    0.37
   2  11  -1    9.14    0.55
  -2 -11   1    9.08    0.76
   1  11  -1    4.10    0.42
   1  11  -1    4.03    0.33
  -1 -11   1    4.15    0.49
   0  11  -1    4.34    0.39
   0  11  -1    3.82    0.28
   0 -11   1    3.91    0.47
  -1  11  -1    6.63    0.37
  -1  11  -1    6.16    0.46
   1 -11   1    6.28    0.55
  -2  11  -1    3.20    0.30
  -2  11  -1    3.01    0.37
   2 -11   1    3.14    0.42
  -3  11  -1    6.40    0.44
  -3  11  -1    6.57    0.50
   3 -11   1    5.38    0.53
  -4  11  -1    6.75    0.52
   4 -11   1    7.04    0.59
  -5  11  -1    9.20    0.70
  -5  11  -1    9.75    0.66
   5 -11   1    7.76    0.70
  -6  11  -1    1.05    0.39
  -6  11  -1    0.92    0.37
   5  10  -1   31.02    1.75
  -5 -10   1   32.31    1.72
   4  10  -1   20.21    1.26
   4  10  -1   20.70    1.07
  -4 -10   1   21.56    1.26
   3  10  -1    6.07    0.53
   3  10  -1    6.13    0.68
  -3 -10   1    6.50    0.64
   2  10  -1    1.36    0.29
   2  10  -1    1.13    0.19
  -2 -10   1    1.03    0.29
   1  10  -1   12.77    0.62
   1  10  -1   13.97    0.78
  -1 -10   1   14.85    0.70
  -1 -10   1   13.20    0.82
   0  10  -1   27.33    1.20
   0  10  -1   27.12    1.07
   0 -10   1   26.71    1.28
  -1  10  -1    0.47    0.11
  -1  10  -1    0.16    0.15
   1 -10   1    0.50    0.19
  -2  10  -1    3.30    0.29
  -2  10  -1    3.39    0.35
   2 -10   1    3.61    0.39
  -3  10  -1    4.89    0.41
  -3  10  -1    4.39    0.36
   3 -10   1    3.77    0.40
  -4  10  -1    2.51    0.38
  -4  10  -1    2.45    0.32
   4 -10   1    1.86    0.31
  -5  10  -1   11.78    0.79
  -5  10  -1   12.15    0.75
   5 -10   1   11.39    0.74
  -6  10  -1   27.39    1.37
  -6  10  -1   27.24    1.39
  -7  10  -1    0.72    0.46
  -7  10  -1   -0.23    0.41
   6   9  -1   35.08    1.99
  -6  -9   1   34.97    1.92
  -6  -9   1   34.43    1.84
   5   9  -1    0.25    0.48
   5   9  -1   -0.05    0.37
  -5  -9   1    0.34    0.38
  -5  -9   1    0.02    0.33
   4   9  -1    2.23    0.44
   4   9  -1    2.09    0.34
  -4  -9   1    1.79    0.40
   3   9  -1    0.16    0.26
   3   9  -1    0.04    0.21
  -3  -9   1    0.38    0.28
   2   9  -1   59.35    2.33
   2   9  -1   61.35    2.48
  -2  -9   1   64.57    2.58
   1   9  -1    7.05    0.38
   1   9  -1    6.87    0.49
  -1  -9   1    6.96    0.40
  -1  -9   1    7.06    0.53
   0   9  -1    1.42    0.16
   0   9  -1    1.58    0.22
   0  -9   1    1.02    0.22
   0  -9   1    1.89    0.25
  -1   9  -1   21.77    0.89
  -1   9  -1   21.70    0.98
   1  -9   1   22.19    1.04
  -2   9  -1   22.86    0.96
  -2   9  -1   23.69    1.04
   2  -9   1   22.53    1.07
  -3   9  -1   10.37    0.57
  -3   9  -1   10.40    0.61
   3  -9   1   10.00    0.62
  -4   9  -1    1.66    0.27
  -4   9  -1    1.91    0.30
   4  -9   1    1.91    0.31
  -5   9  -1    0.02    0.25
  -5   9  -1    0.34    0.25
   5  -9   1   -0.38    0.25
  -6   9  -1    0.35    0.32
  -6   9  -1    0.87    0.32
  -7   9  -1   -0.19    0.43
  -7   9  -1    0.16    0.39
   6   8  -1   23.46    1.45
   6   8  -1   22.55    1.50
  -6  -8   1   23.35    1.54
  -6  -8   1   22.33    1.28
  -6  -8   1   23.55    1.38
   5   8  -1   -0.35    0.32
   5   8  -1   -0.58    0.40
  -5  -8   1   -0.16    0.33
  -5  -8   1    0.21    0.30
   4   8  -1    5.05    0.58
   4   8  -1    4.31    0.47
  -4  -8   1    3.66    0.51
   3   8  -1   11.65    0.76
   3   8  -1   12.38    0.67
  -3  -8   1   12.54    0.81
   2   8  -1    4.10    0.31
   2   8  -1    4.66    0.41
  -2  -8   1    4.09    0.30
  -2  -8   1    4.06    0.45
   1   8  -1   19.17    0.78
   1   8  -1   17.44    0.86
  -1  -8   1   17.75    0.93
  -1  -8   1   19.21    0.76
   0   8  -1   88.34    3.07
   0   8  -1   79.31    3.16
   0  -8   1   89.04    3.09
   0  -8   1   82.83    3.24
  -1   8  -1    9.62    0.52
  -1   8  -1    9.42    0.45
   1  -8   1    8.84    0.54
   1  -8   1   10.07    0.52
  -2   8  -1   29.29    1.24
  -2   8  -1   30.40    1.20
   2  -8   1   29.96    1.28
  -3   8  -1    4.46    0.37
  -3   8  -1    4.53    0.34
   3  -8   1    4.07    0.37
  -4   8  -1    6.29    0.42
  -4   8  -1    5.53    0.45
   4  -8   1    4.69    0.42
  -5   8  -1    6.22    0.55
  -5   8  -1    7.15    0.56
   5  -8   1    6.46    0.54
  -6   8  -1    1.35    0.32
  -7   8  -1    1.23    0.36
  -7   8  -1    1.86    0.45
   6   7  -1    2.68    0.58
  -6  -7   1    2.75    0.49
  -6  -7   1    3.13    0.60
   5   7  -1    1.81    0.36
  -5  -7   1    2.45    0.38
   4   7  -1    5.43    0.59
   4   7  -1    5.09    0.48
  -4  -7   1    5.28    0.51
   3   7  -1   57.63    2.29
   3   7  -1   60.27    2.41
  -3  -7   1   59.85    2.44
   2   7  -1    6.86    0.48
  -2  -7   1    8.52    0.40
  -2  -7   1    7.95    0.55
   1   7  -1   82.58    2.89
   1   7  -1   74.85    2.97
  -1  -7   1   74.96    3.04
  -1  -7   1   85.37    2.87
   0   7  -1   24.09    0.91
   0   7  -1   22.47    0.99
   0  -7   1   22.41    1.05
   0  -7   1   25.17    0.94
  -1   7  -1  155.15    5.49
  -1   7  -1  159.35    5.61
  -1   7  -1  148.47    5.54
   1  -7   1  164.59    5.52
   1  -7   1  143.72    5.58
  -2   7  -1    9.08    0.47
  -2   7  -1    9.22    0.50
  -2   7  -1    9.35    0.53
   2  -7   1    9.67    0.52
  -3   7  -1   41.00    1.55
  -3   7  -1   36.76    1.56
  -3   7  -1   37.10    1.53
   3  -7   1   38.18    1.56
  -4   7  -1    5.31    0.40
  -4   7  -1    5.38    0.43
  -4   7  -1    5.25    0.42
   4  -7   1    5.81    0.42
  -5   7  -1    8.20    0.57
  -5   7  -1    8.27    0.57
  -5   7  -1    8.19    0.59
   5  -7   1    8.24    0.56
  -6   7  -1   26.03    1.32
  -6   7  -1   25.43    1.29
   6  -7   1   26.76    1.34
  -7   7  -1    7.80    0.77
  -7   7  -1    9.15    0.79
   7   6  -1    1.56    0.52
  -7  -6   1    1.18    0.48
  -7  -6   1    0.51    0.47
  -7  -6   1    1.70    0.66
   6   6  -1   25.33    1.47
   6   6  -1   25.31    1.29
  -6  -6   1   22.22    1.45
  -6  -6   1   22.48    1.30
  -6  -6   1   24.33    1.30
   5   6  -1    5.39    0.56
   5   6  -1    4.99    0.59
  -5  -6   1    5.94    0.62
  -5  -6   1    5.26    0.54
  -5  -6   1    5.67    0.67
   4   6  -1   84.46    3.28
   4   6  -1   86.20    3.41
  -4  -6   1   87.20    3.40
   3   6  -1   33.64    1.41
   3   6  -1   35.23    1.51
  -3  -6   1   33.93    1.52
   2   6  -1    0.50    0.14
   2   6  -1    0.83    0.16
  -2  -6   1    1.05    0.14
  -2  -6   1    0.96    0.20
   1   6  -1   37.74    1.60
   1   6  -1   43.37    1.54
  -1  -6   1   44.38    1.52
  -1  -6   1   39.29    1.67
   0   6  -1    0.14    0.06
   0   6  -1    0.15    0.15
   0   6  -1    0.07    0.07
   0  -6   1    0.15    0.10
   0  -6   1    0.08    0.07
   0  -6   1    0.05    0.09
  -1   6  -1    8.93    0.40
  -1   6  -1    8.46    0.48
  -1   6  -1    7.46    0.41
   1  -6   1    9.07    0.48
   1  -6   1    8.38    0.47
   1  -6   1    8.78    0.43
  -2   6  -1   99.71    3.83
  -2   6  -1  111.41    3.88
  -2   6  -1   99.31    3.86
   2  -6   1  111.74    4.00
   2  -6   1  106.32    3.88
   2  -6   1  107.79    3.89
  -3   6  -1   47.85    1.92
  -3   6  -1   49.19    1.88
  -3   6  -1   49.17    1.91
   3  -6   1   50.20    1.92
  -4   6  -1    8.20    0.54
  -4   6  -1    8.25    0.53
  -4   6  -1    9.08    0.51
   4  -6   1    9.45    0.55
  -5   6  -1  105.02    3.72
  -5   6  -1  100.45    3.85
  -5   6  -1   98.66    3.84
   5  -6   1   97.91    3.75
  -6   6  -1    3.80    0.50
  -6   6  -1    2.31    0.40
   6  -6   1    2.59    0.35
  -7   6  -1   -0.20    0.37
  -7   6  -1    0.62    0.35
  -8   6  -1    5.82    0.88
  -8   6  -1    6.44    0.87
   7   5  -1    1.23    0.50
  -7  -5   1    0.35    0.62
  -7  -5   1    0.38    0.44
  -7  -5   1   -0.69    0.44
   6   5  -1    0.25    0.34
   6   5  -1    0.72    0.43
  -6  -5   1    0.23    0.35
  -6  -5   1    1.02    0.45
  -6  -5   1    0.35    0.33
   5   5  -1    2.81    0.46
   5   5  -1    2.50    0.37
  -5  -5   1    3.12    0.46
  -5  -5   1    2.64    0.37
  -5  -5   1    3.54    0.50
   4   5  -1    2.54    0.38
   4   5  -1    2.22    0.31
  -4  -5   1    2.09    0.34
   3   5  -1    1.62    0.27
   3   5  -1    2.08    0.26
  -3  -5   1    1.27    0.25
  -3  -5   1    1.25    0.21
   2   5  -1   19.83    0.83
   2   5  -1   18.73    0.88
  -2  -5   1   18.61    0.91
  -2  -5   1   19.77    0.78
   1   5  -1    0.12    0.13
   1   5  -1   -0.02    0.07
   1   5  -1    0.10    0.07
  -1  -5   1    0.04    0.09
  -1  -5   1    0.02    0.06
  -1  -5   1   -0.05    0.14
  -1  -5   1    0.04    0.09
   0   5  -1   22.17    0.84
   0   5  -1   23.26    0.96
   0   5  -1   21.21    0.89
   0  -5   1   22.69    0.85
   0  -5   1   22.32    0.94
   0  -5   1   22.08    0.90
  -1   5  -1   60.57    2.32
  -1   5  -1   62.47    2.29
  -1   5  -1   64.94    2.36
   1  -5   1   61.39    2.31
   1  -5   1   63.26    2.36
   1  -5   1   66.15    2.35
  -2   5  -1    2.79    0.23
   2  -5   1    2.79    0.24
   2  -5   1    2.66    0.26
   2  -5   1    2.00    0.27
  -3   5  -1    3.00    0.26
  -3   5  -1    3.32    0.27
  -3   5  -1    2.90    0.28
   3  -5   1    3.02    0.29
  -4   5  -1   17.29    0.84
  -4   5  -1   16.29    0.77
  -4   5  -1   15.96    0.82
   4  -5   1   17.57    0.81
  -5   5  -1   11.04    0.70
  -5   5  -1   10.21    0.68
  -5   5  -1   11.91    0.64
   5  -5   1   10.36    0.67
  -6   5  -1    9.91    0.71
  -6   5  -1    8.90    0.75
   6  -5   1    9.33    0.63
  -7   5  -1   10.34    0.80
  -7   5  -1    8.82    0.77
  -8   5  -1    0.42    0.47
  -8   5  -1    0.73    0.49
   7   4  -1    1.00    0.44
  -7  -4   1    0.66    0.54
  -7  -4   1    0.04    0.43
  -7  -4   1    0.53    0.40
   6   4  -1    4.92    0.59
   6   4  -1    6.01    0.70
  -6  -4   1    3.82    0.56
  -6  -4   1    3.81    0.60
  -6  -4   1    4.65    0.56
   5   4  -1   26.38    1.32
   5   4  -1   26.25    1.23
  -5  -4   1   23.91    1.21
  -5  -4   1   24.72    1.24
  -5  -4   1   25.51    1.32
   4   4  -1    5.58    0.44
   4   4  -1    4.24    0.48
  -4  -4   1    5.15    0.49
  -4  -4   1    5.25    0.44
   3   4  -1    0.20    0.13
   3   4  -1   -0.07    0.15
  -3  -4   1    0.16    0.15
  -3  -4   1    0.10    0.15
   2   4  -1   52.94    1.99
   2   4  -1   51.58    2.04
   2   4  -1   53.28    2.08
  -2  -4   1   52.83    1.95
  -2  -4   1   54.42    2.08
  -2  -4   1   54.89    2.01
  -2  -4   1   49.94    2.06
   1   4  -1  162.95    6.11
   1   4  -1  174.94    6.17
   1   4  -1  178.39    6.22
  -1  -4   1  176.99    6.21
  -1  -4   1  173.51    6.09
  -1  -4   1  172.88    6.14
   0   4  -1   77.14    2.82
   0   4  -1   81.25    2.87
   0   4  -1   76.42    2.78
   0  -4   1   75.52    2.86
   0  -4   1   80.10    2.79
   0  -4   1   79.51    2.82
  -1   4  -1   31.40    1.19
  -1   4  -1   30.57    1.17
  -1   4  -1   29.30    1.15
   1  -4   1   30.34    1.19
   1  -4   1   30.31    1.19
   1  -4   1   31.30    1.17
  -2   4  -1  212.94    7.60
  -2   4  -1  216.85    7.58
  -2   4  -1  208.24    7.59
   2  -4   1  219.89    7.61
   2  -4   1  208.75    7.59
   2  -4   1  217.90    7.62
  -3   4  -1   10.13    0.49
  -3   4  -1    8.35    0.49
  -3   4  -1    9.16    0.50
   3  -4   1    9.55    0.57
   3  -4   1   10.49    0.52
  -4   4  -1   26.22    1.09
  -4   4  -1   24.78    1.13
  -4   4  -1   24.45    1.13
   4  -4   1   26.16    1.11
  -5   4  -1    2.14    0.32
  -5   4  -1    2.67    0.34
  -5   4  -1    2.16    0.31
   5  -4   1    2.03    0.28
  -6   4  -1   -0.21    0.27
  -6   4  -1   -0.10    0.26
   6  -4   1   -0.04    0.24
  -7   4  -1    0.67    0.31
  -8   4  -1   23.72    1.37
  -8   4  -1   22.33    1.40
   7   3  -1    0.73    0.44
  -7  -3   1    1.24    0.50
  -7  -3   1    0.71    0.38
  -7  -3   1    0.70    0.39
   6   3  -1    0.89    0.33
  -6  -3   1    0.63    0.38
  -6  -3   1    0.50    0.28
  -6  -3   1    0.51    0.31
   5   3  -1   48.45    2.09
   5   3  -1   47.80    2.01
  -5  -3   1   46.42    1.99
  -5  -3   1   48.82    1.99
  -5  -3   1   47.32    2.08
   4   3  -1    4.80    0.49
   4   3  -1    4.09    0.43
  -4  -3   1    4.06    0.38
  -4  -3   1    5.08    0.44
  -4  -3   1    4.36    0.39
   3   3  -1   28.76    1.21
   3   3  -1   27.19    1.25
  -3  -3   1   29.57    1.19
  -3  -3   1   29.82    1.27
  -3  -3   1   28.70    1.23
   2   3  -1   16.51    0.72
   2   3  -1   15.52    0.75
   2   3  -1   16.13    0.77
  -2  -3   1   17.18    0.74
  -2  -3   1   17.71    0.71
  -2  -3   1   17.08    0.77
  -2  -3   1   16.63    0.76
   1   3  -1    0.75    0.13
   1   3  -1    0.71    0.10
   1   3  -1    0.65    0.12
  -1  -3   1    0.56    0.12
  -1  -3   1    0.65    0.12
  -1  -3   1    0.72    0.09
  -1  -3   1    0.62    0.11
   0   3  -1   46.85    1.73
   0   3  -1   49.37    1.80
   0   3  -1   49.57    1.77
   0  -3   1   49.19    1.74
   0  -3   1   47.78    1.79
   0  -3   1   48.38    1.76
  -1   3  -1   27.60    1.04
  -1   3  -1   27.94    1.04
  -1   3  -1   27.85    1.05
   1  -3   1   27.23    1.05
   1  -3   1   26.36    1.04
   1  -3   1   27.44    1.05
  -2   3  -1    7.62    0.39
  -2   3  -1    7.69    0.37
  -2   3  -1    7.55    0.39
   2  -3   1    7.66    0.41
   2  -3   1    7.11    0.40
   2  -3   1    7.28    0.38
  -3   3  -1    4.06    0.30
  -3   3  -1    3.21    0.33
  -3   3  -1    3.27    0.29
  -3   3  -1    3.33    0.27
   3  -3   1    3.47    0.27
   3  -3   1    3.12    0.33
   3  -3   1    3.68    0.35
  -4   3  -1   28.13    1.27
  -4   3  -1   31.48    1.26
  -4   3  -1   28.86    1.28
   4  -3   1   30.19    1.25
  -5   3  -1    2.76    0.35
  -5   3  -1    2.67    0.35
  -5   3  -1    3.08    0.38
   5  -3   1    2.88    0.35
  -6   3  -1   58.41    2.45
  -6   3  -1   60.80    2.48
   6  -3   1   57.99    2.35
  -7   3  -1    5.97    0.66
  -7   3  -1    5.62    0.71
  -8   3  -1    1.34    0.50
  -8   3  -1    1.65    0.50
  -7  -2   1    4.35    0.56
  -7  -2   1    4.95    0.65
  -7  -2   1    4.26    0.64
   6   2  -1   30.99    1.48
  -6  -2   1   28.40    1.36
  -6  -2   1   29.32    1.51
  -6  -2   1   30.07    1.44
   5   2  -1    0.39    0.20
  -5  -2   1    0.31    0.24
  -5  -2   1    0.37    0.20
  -5  -2   1    0.48    0.28
   4   2  -1    1.19    0.26
   4   2  -1    0.97    0.23
   4   2  -1    1.27    0.21
  -4  -2   1    0.96    0.26
  -4  -2   1    0.96    0.23
  -4  -2   1    1.32    0.22
  -4  -2   1    1.37    0.23
   3   2  -1   41.35    1.66
   3   2  -1   39.24    1.68
   3   2  -1   42.56    1.65
  -3  -2   1   42.63    1.67
  -3  -2   1   43.13    1.65
  -3  -2   1   40.99    1.66
  -3  -2   1   39.27    1.68
  -3  -2   1   43.27    1.65
   2   2  -1    6.21    0.35
   2   2  -1    6.11    0.35
   2   2  -1    6.07    0.37
  -2  -2   1    5.67    0.35
  -2  -2   1    6.38    0.37
  -2  -2   1    6.60    0.34
  -2  -2   1    6.16    0.35
   1   2  -1  341.37   11.73
   1   2  -1  325.13   11.73
   1   2  -1  318.73   11.70
  -1  -2   1  335.96   11.73
  -1  -2   1  337.18   11.69
  -1  -2   1  335.75   11.73
  -1  -2   1  345.67   11.72
   0   2  -1   39.58    1.43
   0   2  -1   39.71    1.42
   0  -2   1   40.73    1.43
   0  -2   1   39.22    1.42
   0  -2   1   39.68    1.46
  -1   2  -1  359.95   13.07
  -1   2  -1  364.44   12.99
  -1   2  -1  372.79   12.99
   1  -2   1  373.63   12.94
   1  -2   1  365.82   13.04
   1  -2   1  381.24   12.97
  -2   2  -1  182.40    6.53
  -2   2  -1  179.61    6.54
  -2   2  -1  177.46    6.53
  -2   2  -1  194.05    6.53
   2  -2   1  183.69    6.53
   2  -2   1  178.99    6.54
   2  -2   1  191.36    6.55
  -3   2  -1   22.70    1.05
  -3   2  -1   27.61    1.06
  -3   2  -1   25.50    1.07
   3  -2   1   24.25    1.08
   3  -2   1   25.15    1.05
   3  -2   1   26.14    1.09
  -4   2  -1   37.33    1.48
  -4   2  -1   33.90    1.49
  -4   2  -1   34.35    1.49
   4  -2   1   37.07    1.47
  -5   2  -1    3.95    0.52
  -5   2  -1    4.44    0.44
  -5   2  -1    4.16    0.43
   5  -2   1    3.81    0.40
  -6   2  -1    5.00    0.53
  -6   2  -1    5.39    0.53
   6  -2   1    3.57    0.47
  -7   2  -1    0.75    0.35
  -7   2  -1    0.61    0.41
  -7   2  -1    0.74    0.35
  -8   2  -1    8.26    0.89
  -8   2  -1    6.33    0.82
  -8  -1   1    4.87    0.65
  -8  -1   1    3.97    0.71
  -7  -1   1    2.39    0.42
  -7  -1   1    3.10    0.52
  -7  -1   1    2.79    0.55
   6   1  -1    1.09    0.31
  -6  -1   1    0.12    0.28
  -6  -1   1    0.34    0.30
  -6  -1   1    0.14    0.23
   5   1  -1   13.84    0.81
   5   1  -1   14.99    0.76
  -5  -1   1   14.51    0.75
  -5  -1   1   13.18    0.84
  -5  -1   1   14.65    0.82
   4   1  -1   13.95    0.75
  -4  -1   1   14.05    0.78
  -4  -1   1   15.24    0.76
  -4  -1   1   14.11    0.74
   3   1  -1   78.42    2.77
   3   1  -1   70.56    2.82
   3   1  -1   73.30    2.80
  -3  -1   1   71.98    2.80
  -3  -1   1   78.26    2.78
  -3  -1   1   75.29    2.76
  -3  -1   1   68.22    2.81
  -3  -1   1   73.44    2.80
  -3  -1   1   79.88    2.80
   2   1  -1    9.61    0.44
   2   1  -1    8.75    0.47
   2   1  -1    9.02    0.45
  -2  -1   1    9.18    0.48
  -2  -1   1    9.34    0.45
  -2  -1   1    9.31    0.44
  -2  -1   1   10.14    0.46
  -2  -1   1    8.62    0.45
   1   1  -1   -0.07    0.04
   1   1  -1   -0.07    0.04
   1   1  -1   -0.11    0.04
  -1  -1   1    0.00    0.04
  -1  -1   1   -0.01    0.04
  -1  -1   1   -0.08    0.05
  -1  -1   1   -0.01    0.04
  -1   1  -1  130.49    4.87
  -1   1  -1  139.13    4.86
  -1   1  -1  144.23    4.89
   1  -1   1  138.57    4.89
  -2   1  -1    4.33    0.28
  -2   1  -1    4.23    0.27
  -2   1  -1    4.36    0.27
  -2   1  -1    4.77    0.28
  -2   1  -1    4.10    0.26
   2  -1   1    5.03    0.29
   2  -1   1    4.53    0.28
  -3   1  -1   22.27    0.94
  -3   1  -1   20.15    0.92
  -3   1  -1   21.53    0.94
  -3   1  -1   21.34    0.94
   3  -1   1   21.40    0.93
   3  -1   1   22.68    0.95
   3  -1   1   20.47    0.94
  -4   1  -1    8.37    0.57
  -4   1  -1   10.95    0.71
  -4   1  -1    8.57    0.55
  -4   1  -1    8.85    0.54
   4  -1   1   10.02    0.68
  -5   1  -1    7.37    0.54
  -5   1  -1    7.59    0.55
   5  -1   1    7.52    0.54
  -6   1  -1    4.75    0.56
  -6   1  -1    5.46    0.56
  -6   1  -1    5.70    0.53
   6  -1   1    5.14    0.54
  -7   1  -1    0.05    0.34
  -7   1  -1    0.20    0.36
  -7   1  -1    0.87    0.43
   7  -1   1    0.41    0.34
  -8   1  -1   -0.44    0.54
  -8   1  -1   -0.12    0.45
  -8   0   1   -0.52    0.46
  -8   0   1    0.77    0.59
  -7   0   1   -0.59    0.35
  -7   0   1    0.60    0.44
   6   0  -1    0.66    0.24
   6   0  -1    0.83    0.30
  -6   0   1    0.99    0.24
  -6   0   1    1.10    0.28
  -6   0   1    0.39    0.32
   5   0  -1   -0.23    0.19
   5   0  -1   -0.33    0.16
  -5   0   1    0.26    0.26
  -5   0   1    0.20    0.17
  -5   0   1   -0.12    0.21
  -5   0   1    0.41    0.21
   4   0  -1    8.80    0.49
   4   0  -1    8.36    0.52
  -4   0   1    9.07    0.53
  -4   0   1    8.43    0.48
  -4   0   1    7.43    0.50
  -4   0   1    8.20    0.56
   3   0  -1   26.78    1.17
   3   0  -1   28.38    1.19
   3   0  -1   29.05    1.11
  -3   0   1   28.11    1.11
  -3   0   1   28.74    1.18
  -3   0   1   25.66    1.16
  -3   0   1   27.35    1.19
  -3   0   1   27.69    1.11
   2   0  -1    4.88    0.31
   2   0  -1    4.63    0.30
   2   0  -1    4.71    0.25
  -2   0   1    4.47    0.25
  -2   0   1    4.57    0.30
  -2   0   1    4.53    0.30
  -2   0   1    4.89    0.31
  -2   0   1    4.96    0.26
   1   0  -1  452.45   15.71
   1   0  -1  443.60   15.76
  -1   0   1  428.19   15.74
  -1   0   1  447.54   15.74
  -1   0   1  452.44   15.71
  -1   0   1  469.92   15.69
  -1   0  -1  344.47   12.15
  -1   0  -1  366.17   12.19
  -1   0  -1  337.44   12.23
  -1   0  -1  348.46   12.18
  -1   0  -1  350.20   12.22
   1   0   1  335.34   12.23
   1   0   1  352.07   12.26
   1   0   1  347.65   12.23
  -2   0  -1  106.69    3.76
  -2   0  -1  103.06    3.73
  -2   0  -1  101.16    3.73
  -2   0  -1  104.41    3.74
  -2   0  -1  104.29    3.74
   2   0   1  105.65    3.74
   2   0   1  100.67    3.75
   2   0   1  106.65    3.74
   2   0   1  100.67    3.73
  -3   0  -1   37.42    1.44
  -3   0  -1   37.14    1.45
  -3   0  -1   36.35    1.46
  -3   0  -1   33.19    1.44
  -3   0  -1   37.58    1.45
   3   0   1   36.50    1.45
   3   0   1   32.95    1.44
  -4   0  -1    0.04    0.21
  -4   0  -1    0.24    0.17
  -4   0  -1    0.40    0.16
   4   0   1    0.52    0.17
  -5   0  -1   19.93    0.99
  -5   0  -1   19.59    1.00
  -5   0  -1   18.93    1.01
   5   0   1   21.21    0.99
  -6   0  -1    0.70    0.27
  -6   0  -1    0.75    0.32
  -6   0  -1    0.77    0.29
   6   0   1    0.69    0.29
  -7   0  -1   28.24    1.43
  -7   0  -1   27.92    1.42
  -7   0  -1   29.16    1.49
   7   0   1   27.34    1.40
  -8   0  -1    1.81    0.60
  -8   0  -1    0.72    0.46
  -8   1   1    2.42    0.49
  -8   1   1    1.40    0.60
  -7   1   1    6.11    0.69
  -7   1   1    6.47    0.78
   6  -1  -1    4.32    0.43
  -6   1   1    4.97    0.51
  -6   1   1    4.38    0.44
  -6   1   1    4.43    0.57
   5  -1  -1    4.52    0.48
   5  -1  -1    5.36    0.41
  -5   1   1    5.33    0.40
  -5   1   1    4.03    0.45
  -5   1   1    5.40    0.47
  -5   1   1    4.22    0.48
   4  -1  -1    0.35    0.17
   4  -1  -1    0.29    0.12
  -4   1   1    0.40    0.19
  -4   1   1    0.32    0.17
  -4   1   1    0.36    0.17
   3  -1  -1   42.94    1.58
   3  -1  -1   43.67    1.70
   3  -1  -1   38.40    1.65
  -3   1   1   39.35    1.65
  -3   1   1   43.03    1.71
  -3   1   1   44.63    1.59
  -3   1   1   41.23    1.67
   2  -1  -1   58.26    2.17
   2  -1  -1   58.53    2.15
   2  -1  -1   56.58    2.06
  -2   1   1   56.88    2.16
  -2   1   1   57.96    2.14
  -2   1   1   56.92    2.07
  -2   1   1   57.80    2.15
   1  -1  -1  959.51   33.77
   1  -1  -1  984.16   33.89
  -1   1   1  907.53   33.48
  -1   1   1 1000.00   33.79
  -1   1   1  952.27   33.73
  -1  -1  -1  163.19    5.78
  -1  -1  -1  172.33    5.85
  -1  -1  -1  164.01    5.78
  -1  -1  -1  166.42    5.79
   1   1   1  161.71    5.84
   1   1   1  160.71    5.79
   1   1   1  164.29    5.79
  -2  -1  -1   18.48    0.77
  -2  -1  -1   18.16    0.76
  -2  -1  -1   19.26    0.77
  -2  -1  -1   19.22    0.83
  -2  -1  -1   18.63    0.79
   2   1   1   18.49    0.82
   2   1   1   19.14    0.78
   2   1   1   18.37    0.78
  -3  -1  -1  134.49    4.75
  -3  -1  -1  132.47    4.79
  -3  -1  -1  126.79    4.76
  -3  -1  -1  130.25    4.73
   3   1   1  127.33    4.76
   3   1   1  133.06    4.79
  -4  -1  -1    0.95    0.18
  -4  -1  -1    0.97    0.21
  -4  -1  -1    0.96    0.22
   4   1   1    1.26    0.22
   4   1   1    0.98    0.20
  -5  -1  -1   -0.04    0.21
  -5  -1  -1    0.09    0.21
  -5  -1  -1   -0.38    0.22
   5   1   1    0.07    0.20
  -6  -1  -1    4.67    0.51
  -6  -1  -1    3.81    0.55
  -6  -1  -1    3.82    0.51
   6   1   1    3.92    0.53
  -7  -1  -1    1.24    0.39
  -7  -1  -1    2.29    0.42
   7   1   1    1.68    0.42
  -8  -1  -1    4.75    0.67
  -8  -1  -1    6.89    0.97
  -8   2   1    2.27    0.62
  -8   2   1    1.76    0.54
  -7   2   1    0.65    0.38
  -7   2   1    0.16    0.39
   6  -2  -1   -0.20    0.20
  -6   2   1    0.24    0.29
  -6   2   1    0.47    0.26
  -6   2   1   -0.13    0.19
   5  -2  -1    1.97    0.28
  -5   2   1    1.86    0.27
  -5   2   1    1.43    0.25
  -5   2   1    1.26    0.23
  -5   2   1    1.42    0.30
   4  -2  -1   44.33    1.66
   4  -2  -1   42.19    1.78
  -4   2   1   42.59    1.81
  -4   2   1   47.35    1.68
  -4   2   1   40.25    1.76
   3  -2  -1   62.09    2.33
   3  -2  -1   57.07    2.28
   3  -2  -1   59.51    2.17
  -3   2   1   57.79    2.30
  -3   2   1   63.59    2.17
  -3   2   1   58.08    2.28
  -3   2   1   57.99    2.28
   2  -2  -1   36.72    1.45
   2  -2  -1   36.65    1.33
   2  -2  -1   35.53    1.42
   2  -2  -1   36.59    1.42
  -2   2   1   36.83    1.44
  -2   2   1   37.18    1.42
  -2   2   1   37.36    1.32
  -2   2   1   35.46    1.41
   1  -2  -1  234.67    8.01
   1  -2  -1  220.90    7.94
   1  -2  -1  229.53    7.98
  -1   2   1  228.87    7.98
  -1   2   1  229.14    8.00
  -1   2   1  223.72    7.97
  -1   2   1  222.18    7.94
   0  -2  -1   10.40    0.42
   0  -2  -1   10.24    0.44
   0  -2  -1   10.35    0.38
   0  -2  -1    9.93    0.44
   0   2   1    9.57    0.41
   0   2   1   10.65    0.45
   0   2   1   10.00    0.44
  -1  -2  -1  426.86   15.42
  -1  -2  -1  436.35   15.42
  -1  -2  -1  450.58   15.42
  -1  -2  -1  422.89   15.38
   1   2   1  454.48   15.42
   1   2   1  439.16   15.35
   1   2   1  442.11   15.37
  -2  -2  -1    0.47    0.11
  -2  -2  -1    0.43    0.12
  -2  -2  -1    0.35    0.10
  -2  -2  -1    0.68    0.17
   2   2   1    0.50    0.11
   2   2   1    0.47    0.13
   2   2   1    0.39    0.11
  -3  -2  -1    3.86    0.32
  -3  -2  -1    3.61    0.39
  -3  -2  -1    3.92    0.32
  -3  -2  -1    4.02    0.34
  -3  -2  -1    3.54    0.35
   3   2   1    3.72    0.33
   3   2   1    3.10    0.32
  -4  -2  -1   45.16    1.90
  -4  -2  -1   44.40    1.88
  -4  -2  -1   44.11    1.83
   4   2   1   46.29    1.90
   4   2   1   47.26    1.89
   4   2   1   47.14    1.85
  -5  -2  -1   36.41    1.59
  -5  -2  -1   35.31    1.63
  -5  -2  -1   35.46    1.62
   5   2   1   38.62    1.61
   5   2   1   37.50    1.64
  -6  -2  -1   15.92    0.95
  -6  -2  -1   14.62    0.97
  -6  -2  -1   14.26    0.89
   6   2   1   15.80    0.94
  -7  -2  -1   11.63    0.85
  -7  -2  -1   10.68    1.00
  -7  -2  -1   10.29    0.90
  -8   3   1    1.92    0.49
  -8   3   1    2.35    0.60
  -7   3   1    0.96    0.38
  -7   3   1    0.38    0.40
   6  -3  -1    6.56    0.48
  -6   3   1    6.10    0.58
  -6   3   1    5.66    0.47
  -6   3   1    5.91    0.62
   5  -3  -1    0.87    0.18
  -5   3   1    0.72    0.19
  -5   3   1    0.66    0.24
  -5   3   1    0.59    0.22
   4  -3  -1   28.78    1.13
  -4   3   1   26.96    1.26
  -4   3   1   27.72    1.28
  -4   3   1   30.45    1.14
   3  -3  -1    0.53    0.19
   3  -3  -1    0.69    0.11
   3  -3  -1    0.68    0.18
  -3   3   1    0.45    0.14
  -3   3   1    0.43    0.20
  -3   3   1    0.72    0.10
  -3   3   1    0.51    0.13
   2  -3  -1    1.99    0.24
   2  -3  -1    1.92    0.15
   2  -3  -1    2.01    0.23
  -2   3   1    1.99    0.21
  -2   3   1    1.94    0.23
  -2   3   1    2.06    0.20
  -2   3   1    2.02    0.14
   1  -3  -1  100.65    3.52
   1  -3  -1   96.36    3.50
   1  -3  -1  100.45    3.55
  -1   3   1  100.47    3.52
  -1   3   1  101.94    3.51
  -1   3   1   97.12    3.51
  -1   3   1   92.25    3.53
   0  -3  -1    4.03    0.25
   0  -3  -1    4.02    0.25
   0  -3  -1    4.38    0.18
   0  -3  -1    4.31    0.23
   0   3   1    4.03    0.17
   0   3   1    3.96    0.25
   0   3   1    3.92    0.22
  -1  -3  -1   12.96    0.63
  -1  -3  -1   12.77    0.62
  -1  -3  -1   13.35    0.50
  -1  -3  -1   13.13    0.55
   1   3   1   13.21    0.62
   1   3   1   12.94    0.52
   1   3   1   12.45    0.55
  -2  -3  -1   17.49    0.84
  -2  -3  -1   17.44    0.74
  -2  -3  -1   17.28    0.72
   2   3   1   18.60    0.74
   2   3   1   17.10    0.77
  -3  -3  -1   43.20    1.65
  -3  -3  -1   42.80    1.68
  -3  -3  -1   43.37    1.66
  -3  -3  -1   40.84    1.75
   3   3   1   44.98    1.70
   3   3   1   40.18    1.70
   3   3   1   41.70    1.75
  -4  -3  -1    2.17    0.30
  -4  -3  -1    3.10    0.36
  -4  -3  -1    2.50    0.35
   4   3   1    2.51    0.32
   4   3   1    2.34    0.33
   4   3   1    1.99    0.32
  -5  -3  -1    0.50    0.23
  -5  -3  -1    0.14    0.27
  -5  -3  -1    0.04    0.24
   5   3   1    0.22    0.21
   5   3   1    0.57    0.26
   5   3   1   -0.01    0.24
  -6  -3  -1    7.93    0.66
  -6  -3  -1    8.03    0.74
  -6  -3  -1    7.16    0.69
   6   3   1    6.98    0.67
  -7  -3  -1    1.00    0.42
  -7  -3  -1    1.20    0.52
  -7  -3  -1    1.08    0.41
  -8   4   1   -0.23    0.42
  -8   4   1   -0.83    0.47
  -7   4   1    2.41    0.49
  -7   4   1    3.43    0.52
  -6   4   1    3.13    0.43
  -6   4   1    2.88    0.46
   5  -4  -1   14.48    0.65
  -5   4   1   13.60    0.63
  -5   4   1   12.97    0.81
  -5   4   1   12.78    0.79
   4  -4  -1   13.54    0.60
  -4   4   1   13.99    0.58
  -4   4   1   12.40    0.72
  -4   4   1   13.00    0.72
   3  -4  -1   81.82    2.90
  -3   4   1   81.89    2.87
  -3   4   1   77.21    2.99
  -3   4   1   78.67    3.02
   2  -4  -1   13.36    0.63
   2  -4  -1   13.70    0.57
   2  -4  -1   13.07    0.65
  -2   4   1   13.63    0.61
  -2   4   1   13.07    0.62
  -2   4   1   13.64    0.56
  -2   4   1   12.80    0.69
   1  -4  -1  140.71    5.19
   1  -4  -1  144.69    5.22
   1  -4  -1  151.45    5.23
  -1   4   1  145.99    5.20
  -1   4   1  143.88    5.16
  -1   4   1  149.07    5.21
   0  -4  -1   19.08    0.69
   0  -4  -1   17.48    0.79
   0  -4  -1   19.75    0.76
   0  -4  -1   17.41    0.79
   0   4   1   18.66    0.68
   0   4   1   18.29    0.75
   0   4   1   17.99    0.79
  -1  -4  -1    2.02    0.18
  -1  -4  -1    2.17    0.12
  -1  -4  -1    1.87    0.24
  -1  -4  -1    2.13    0.24
   1   4   1    2.11    0.14
   1   4   1    1.99    0.24
   1   4   1    2.29    0.27
   1   4   1    1.78    0.17
  -2  -4  -1    4.39    0.24
  -2  -4  -1    3.31    0.26
  -2  -4  -1    4.07    0.46
  -2  -4  -1    3.59    0.33
   2   4   1    3.30    0.32
   2   4   1    3.27    0.32
   2   4   1    3.66    0.26
  -3  -4  -1    4.82    0.44
  -3  -4  -1    5.64    0.45
  -3  -4  -1    5.89    0.38
   3   4   1    6.01    0.45
   3   4   1    6.33    0.42
   3   4   1    5.18    0.41
  -4  -4  -1   16.70    0.84
  -4  -4  -1   17.91    0.95
   4   4   1   17.16    0.85
   4   4   1   17.83    0.96
   4   4   1   17.86    0.94
  -5  -4  -1   11.26    0.78
  -5  -4  -1   10.61    0.74
  -5  -4  -1   11.09    0.69
   5   4   1   12.21    0.81
   5   4   1   10.52    0.70
   5   4   1   11.93    0.79
  -6  -4  -1   28.88    1.51
  -6  -4  -1   29.25    1.54
  -6  -4  -1   28.80    1.41
   6   4   1   31.21    1.56
  -7  -4  -1    0.52    0.56
  -7  -4  -1    0.61    0.42
  -7  -4  -1    0.19    0.45
  -8   5   1    3.02    0.61
  -8   5   1    2.57    0.58
  -7   5   1    1.71    0.45
  -7   5   1    1.37    0.42
  -6   5   1   24.13    1.28
  -6   5   1   25.14    1.28
   5  -5  -1   96.59    3.40
  -5   5   1   93.50    3.36
  -5   5   1   90.79    3.61
  -5   5   1   91.54    3.60
   4  -5  -1    7.60    0.41
  -4   5   1    6.24    0.48
  -4   5   1    8.22    0.39
  -4   5   1    6.29    0.49
   3  -5  -1   37.86    1.39
  -3   5   1   34.26    1.45
  -3   5   1   37.45    1.37
  -3   5   1   34.61    1.49
   2  -5  -1   54.55    1.98
   2  -5  -1   50.58    2.05
   2  -5  -1   53.45    2.02
  -2   5   1   49.67    2.02
  -2   5   1   52.88    1.99
  -2   5   1   55.47    1.98
  -2   5   1   53.38    2.02
   1  -5  -1   28.65    1.22
   1  -5  -1   29.65    1.20
   1  -5  -1   31.36    1.17
  -1   5   1   30.26    1.21
  -1   5   1   31.25    1.15
   0  -5  -1   53.71    1.90
   0  -5  -1   53.45    1.98
   0  -5  -1   53.29    2.03
   0  -5  -1   52.36    2.04
   0   5   1   51.98    1.97
   0   5   1   52.36    1.88
   0   5   1   52.12    2.03
  -1  -5  -1    3.71    0.17
  -1  -5  -1    3.32    0.33
  -1  -5  -1    3.45    0.26
  -1  -5  -1    3.05    0.28
   1   5   1    2.66    0.32
   1   5   1    2.92    0.23
   1   5   1    3.41    0.20
  -2  -5  -1   13.83    0.76
  -2  -5  -1   15.41    0.59
   2   5   1   13.33    0.74
   2   5   1   15.11    0.64
   2   5   1   13.28    0.68
  -3  -5  -1    4.90    0.34
  -3  -5  -1    4.05    0.43
   3   5   1    4.72    0.44
   3   5   1    4.64    0.38
  -4  -5  -1    2.63    0.35
  -4  -5  -1    3.34    0.44
   4   5   1    2.84    0.37
   4   5   1    2.89    0.41
   4   5   1    3.07    0.39
  -5  -5  -1    0.89    0.25
  -5  -5  -1    1.39    0.32
  -5  -5  -1    1.05    0.32
   5   5   1    0.54    0.33
   5   5   1    0.85    0.26
  -6  -5  -1   10.86    1.53
  -6  -5  -1   12.94    0.94
  -6  -5  -1   11.59    0.81
   6   5   1   11.81    1.33
  -7  -5  -1    0.54    0.59
  -7  -5  -1   -0.50    0.43
  -7  -5  -1   -0.73    0.52
  -8   6   1    0.73    0.49
  -8   6   1   -0.81    0.43
  -7   6   1   16.93    1.06
  -7   6   1   16.01    1.02
  -6   6   1   34.00    1.60
  -6   6   1   33.64    1.60
   5  -6  -1    0.66    0.19
  -5   6   1    0.62    0.18
  -5   6   1    0.54    0.24
  -5   6   1    0.39    0.24
   4  -6  -1   10.50    0.53
  -4   6   1    9.00    0.58
  -4   6   1    9.80    0.49
  -4   6   1   10.11    0.63
   3  -6  -1   19.55    0.82
  -3   6   1   19.76    0.81
  -3   6   1   18.71    0.86
  -3   6   1   17.62    0.88
   2  -6  -1   23.88    0.98
   2  -6  -1   24.35    1.01
  -2   6   1   24.68    1.00
  -2   6   1   21.79    1.00
  -2   6   1   21.79    0.97
  -2   6   1   24.45    1.02
   1  -6  -1    5.35    0.36
   1  -6  -1    5.98    0.34
   1  -6  -1    6.12    0.40
  -1   6   1    6.05    0.40
  -1   6   1    5.87    0.30
  -1   6   1    5.46    0.35
   0  -6  -1   13.77    0.66
   0  -6  -1   15.33    0.58
   0  -6  -1   14.09    0.71
   0  -6  -1   14.10    0.73
   0   6   1   13.76    0.72
   0   6   1   14.56    0.55
   0   6   1   13.70    0.64
  -1  -6  -1    3.24    0.33
  -1  -6  -1    3.97    0.20
   1   6   1    3.27    0.27
   1   6   1    3.63    0.22
  -2  -6  -1    4.89    0.26
  -2  -6  -1    4.35    0.41
   2   6   1    4.82    0.31
   2   6   1    4.40    0.33
  -3  -6  -1   97.50    3.86
  -3  -6  -1  106.54    3.61
   3   6   1   99.35    3.78
   3   6   1   95.65    3.75
  -4  -6  -1    8.20    0.68
  -4  -6  -1    8.70    0.55
   4   6   1    9.49    0.68
   4   6   1    9.27    0.58
  -5  -6  -1    0.45    0.35
  -5  -6  -1    0.47    0.26
  -5  -6  -1    0.87    0.34
   5   6   1    0.21    0.27
   5   6   1    0.17    0.34
  -6  -6  -1   -0.14    0.48
  -6  -6  -1    0.42    0.35
  -6  -6  -1    0.00    0.42
   6   6   1    0.30    0.48
  -7   7   1    2.87    0.53
  -7   7   1    2.95    0.48
  -6   7   1   17.68    1.08
  -6   7   1   18.91    1.04
   5  -7  -1   63.08    2.31
  -5   7   1   60.43    2.50
  -5   7   1   58.51    2.46
   4  -7  -1   15.05    0.74
  -4   7   1   15.90    0.81
  -4   7   1   16.32    0.73
  -4   7   1   14.92    0.82
   3  -7  -1   24.91    1.05
  -3   7   1   25.47    1.05
  -3   7   1   24.08    1.11
  -3   7   1   23.75    1.05
   2  -7  -1    2.06    0.26
  -2   7   1    1.89    0.22
  -2   7   1    2.05    0.20
  -2   7   1    1.97    0.30
  -2   7   1    2.27    0.32
   1  -7  -1   80.73    3.08
   1  -7  -1   88.22    2.99
   1  -7  -1   77.50    3.05
  -1   7   1   74.82    3.01
  -1   7   1   80.22    3.07
  -1   7   1   86.85    2.94
   0  -7  -1    4.25    0.26
   0  -7  -1    4.38    0.37
   0   7   1    4.39    0.22
   0   7   1    4.18    0.29
  -1  -7  -1   17.50    0.93
  -1  -7  -1   19.91    0.73
   1   7   1   19.01    0.75
   1   7   1   17.37    0.83
  -2  -7  -1    0.11    0.19
  -2  -7  -1    0.47    0.11
   2   7   1    0.49    0.16
   2   7   1    0.91    0.16
  -3  -7  -1  113.45    4.46
  -3  -7  -1  117.82    4.15
   3   7   1  114.46    4.23
   3   7   1  117.45    4.38
  -4  -7  -1    5.30    0.61
  -4  -7  -1    4.69    0.44
   4   7   1    5.33    0.45
   4   7   1    6.02    0.60
  -5  -7  -1    0.81    0.29
  -5  -7  -1    0.07    0.39
   5   7   1    0.77    0.39
   5   7   1    0.79    0.29
  -6  -7  -1   11.03    1.12
  -6  -7  -1   10.26    1.03
   6   7   1    9.65    1.07
  -7   8   1    0.00    0.42
  -7   8   1    0.08    0.39
  -6   8   1    7.13    0.70
  -6   8   1    6.54    0.65
   5  -8  -1   -0.16    0.23
  -5   8   1    0.12    0.27
  -5   8   1   -0.36    0.23
  -4   8   1   15.78    0.80
  -4   8   1   16.54    0.89
  -4   8   1   16.87    0.83
   3  -8  -1   26.45    1.17
  -3   8   1   26.98    1.22
  -3   8   1   27.11    1.16
  -3   8   1   28.84    1.19
   2  -8  -1   12.66    0.67
  -2   8   1   13.22    0.68
  -2   8   1   13.59    0.61
   1  -8  -1    7.06    0.42
   1  -8  -1    6.49    0.46
  -1   8   1    8.05    0.37
  -1   8   1    6.46    0.43
   0  -8  -1  119.01    4.03
   0  -8  -1  108.74    4.22
   0   8   1  113.30    3.99
   0   8   1  108.84    4.13
  -1  -8  -1   11.89    0.49
  -1  -8  -1   10.79    0.68
   1   8   1   12.09    0.52
   1   8   1   10.63    0.61
  -2  -8  -1    2.29    0.20
  -2  -8  -1    2.36    0.38
   2   8   1    2.23    0.33
   2   8   1    1.98    0.23
  -3  -8  -1   24.74    1.33
  -3  -8  -1   27.44    1.05
   3   8   1   23.36    1.20
   3   8   1   25.51    1.09
  -4  -8  -1    5.40    0.48
  -4  -8  -1    6.80    0.71
   4   8   1    7.17    0.70
   4   8   1    6.02    0.51
  -5  -8  -1    1.69    0.48
  -5  -8  -1    1.84    0.40
   5   8   1    2.68    0.50
  -6  -8  -1    1.36    0.54
  -6  -8  -1    2.34    0.65
   6   8   1    2.69    0.68
  -7   9   1   12.20    0.96
  -7   9   1   12.06    0.91
  -6   9   1    5.94    0.56
  -6   9   1    5.54    0.68
   5  -9  -1    9.56    0.64
  -5   9   1    9.81    0.68
   4  -9  -1    5.35    0.45
  -4   9   1    6.31    0.47
  -4   9   1    5.70    0.52
   3  -9  -1    8.71    0.54
  -3   9   1    9.11    0.51
  -3   9   1    8.28    0.57
   2  -9  -1    2.21    0.29
  -2   9   1    2.28    0.23
  -2   9   1    1.81    0.26
   1  -9  -1    5.88    0.47
   1  -9  -1    5.55    0.42
  -1   9   1    6.49    0.32
  -1   9   1    5.99    0.41
   0  -9  -1   28.43    1.31
   0  -9  -1   29.16    1.13
   0   9   1   27.83    1.07
   0   9   1   27.39    1.22
  -1  -9  -1    4.28    0.47
  -1  -9  -1    4.15    0.28
   1   9   1    4.23    0.30
   1   9   1    4.00    0.38
  -2  -9  -1    0.66    0.29
  -2  -9  -1    0.79    0.15
   2   9   1    0.39    0.19
   2   9   1    0.70    0.23
  -3  -9  -1    1.95    0.58
   3   9   1    3.35    0.37
   3   9   1    3.50    0.43
  -4  -9  -1    0.35    0.39
  -4  -9  -1    0.26    0.37
   4   9   1    1.36    0.48
  -5  -9  -1    2.72    0.51
   5   9   1    2.69    0.62
  -7  10   1   -0.38    0.46
  -7  10   1    0.71    0.42
  -6  10   1    1.46    0.35
  -6  10   1    0.51    0.35
  -5  10   1    0.42    0.29
  -5  10   1    0.69    0.29
   4 -10  -1    6.46    0.54
  -4  10   1    6.78    0.50
  -4  10   1    7.32    0.59
   3 -10  -1    1.13    0.25
  -3  10   1    1.66    0.23
  -3  10   1    1.10    0.22
   2 -10  -1    0.87    0.22
  -2  10   1    0.77    0.16
  -2  10   1    0.62    0.21
   1 -10  -1   24.80    1.16
   1 -10  -1   23.29    1.05
  -1  10   1   23.37    0.95
  -1  10   1   23.86    1.08
   0 -10  -1    5.36    0.39
   0 -10  -1    5.70    0.51
   0  10   1    4.76    0.30
   0  10   1    4.57    0.41
  -1 -10  -1   25.28    1.27
  -1 -10  -1   25.41    1.01
   1  10   1   25.20    1.02
   1  10   1   24.20    1.17
  -2 -10  -1    2.81    0.43
   2  10   1    2.18    0.28
   2  10   1    2.03    0.36
  -3 -10  -1   14.86    1.03
  -4 -10  -1    3.24    0.53
  -5 -10  -1    5.68    0.80
   5  10   1    6.39    0.94
  -6  11   1    7.40    0.76
  -6  11   1    7.10    0.72
  -5  11   1    0.91    0.29
  -5  11   1    0.78    0.35
   4 -11  -1   30.44    1.45
  -4  11   1   33.95    1.55
  -4  11   1   34.66    1.44
   3 -11  -1    2.13    0.33
  -3  11   1    2.03    0.26
  -3  11   1    1.52    0.40
   2 -11  -1   35.29    1.58
  -2  11   1   35.25    1.54
  -2  11   1   35.90    1.40
   1 -11  -1   50.00    2.12
  -1  11   1   49.38    1.86
  -1  11   1   50.04    2.04
   0 -11  -1   25.77    1.31
   0  11   1   24.59    1.00
   0  11   1   25.54    1.18
  -1 -11  -1    0.25    0.30
   1  11   1    0.59    0.20
   1  11   1    0.50    0.27
  -2 -11  -1   28.99    1.51
   2  11   1   27.15    1.39
  -3 -11  -1   12.47    0.99
   3  11   1   12.17    0.89
  -4 -11  -1    2.12    0.53
   4  11   1    2.91    0.55
  -6  12   1    2.43    0.48
  -6  12   1    1.37    0.43
  -5  12   1    1.51    0.40
  -5  12   1    2.10    0.35
   4 -12  -1   15.01    0.90
  -4  12   1   14.74    0.81
  -4  12   1   15.09    0.91
   3 -12  -1   14.65    0.88
  -3  12   1   14.76    0.85
  -3  12   1   14.10    0.74
   2 -12  -1    3.26    0.49
  -2  12   1    3.19    0.30
  -2  12   1    3.24    0.41
   1 -12  -1    0.18    0.28
  -1  12   1   -0.20    0.23
  -1  12   1    0.46    0.14
   0 -12  -1    1.08    0.44
   0  12   1    1.12    0.18
   0  12   1    1.77    0.31
  -1 -12  -1    4.70    0.65
   1  12   1    5.22    0.57
  -2 -12  -1    4.40    0.65
   2  12   1    5.01    0.59
  -3 -12  -1    1.64    0.48
   3  12   1    1.82    0.45
  -4 -12  -1   11.11    1.06
   4  12   1   10.64    1.11
  -5  13   1   26.52    1.30
  -5  13   1   26.71    1.40
   4 -13  -1    0.22    0.44
  -4  13   1    0.47    0.32
  -4  13   1    1.30    0.35
   3 -13  -1   14.77    0.96
  -3  13   1   15.08    0.77
  -3  13   1   15.88    0.94
   2 -13  -1    4.07    0.60
  -2  13   1    4.14    0.36
  -2  13   1    3.59    0.49
   1 -13  -1    0.68    0.34
  -1  13   1    0.63    0.27
   0 -13  -1   -0.25    0.34
   0  13   1    0.77    0.29
  -1 -13  -1   32.25    1.67
   1  13   1   30.67    1.51
  -2 -13  -1    9.11    1.30
   2  13   1    7.81    0.77
  -3 -13  -1    1.99    0.58
   3  13   1    1.65    0.53
  -5  14   1    5.53    0.73
  -5  14   1    5.50    0.66
  -4  14   1    2.61    0.37
  -4  14   1    2.53    0.47
  -3  14   1    0.66    0.24
  -3  14   1   -0.51    0.28
   2 -14  -1    8.38    0.76
  -2  14   1    6.28    0.64
   1 -14  -1    1.25    0.40
  -1  14   1    1.05    0.31
   0 -14  -1    0.21    0.41
   0  14   1    0.36    0.34
  -1 -14  -1    1.99    0.48
   1  14   1    2.39    0.46
  -2 -14  -1    0.70    0.51
   2  14   1    0.30    0.45
  -4  15   1    2.18    0.46
   3 -15  -1    3.55    0.59
  -3  15   1    1.67    0.40
   2 -15  -1    4.19    0.59
  -2  15   1    5.06    0.56
   1 -15  -1    3.30    0.59
  -1  15   1    4.21    0.61
   0 -15  -1   15.80    1.17
   0  15   1   16.22    1.10
  -1 -15  -1    7.92    0.89
   1  15   1    5.19    0.70
   0  16  -2   10.35    0.97
   0 -16   2   11.20    1.09
  -1  16  -2   14.44    1.02
   1 -16   2   12.15    1.12
  -2  16  -2    9.59    0.75
   2 -16   2    8.45    0.96
  -3  16  -2    0.79    0.42
   3 -16   2    0.33    0.54
   2  15  -2    2.99    0.56
  -2 -15   2    3.03    0.61
   1  15  -2   23.97    1.40
  -1 -15   2   25.84    1.54
   0  15  -2    0.41    0.35
   0 -15   2    0.88    0.45
  -1  15  -2    1.42    0.38
   1 -15   2    1.19    0.46
  -2  15  -2   14.26    0.89
  -2  15  -2   14.97    0.76
   2 -15   2   14.50    1.09
  -3  15  -2   35.67    1.52
  -3  15  -2   35.92    1.69
   3 -15   2   34.95    1.80
  -4  15  -2    4.29    0.54
  -4  15  -2    3.94    0.47
   4 -15   2    4.08    0.65
   3  14  -2    2.90    0.59
  -3 -14   2    3.36    0.67
   2  14  -2    5.93    0.75
  -2 -14   2    6.39    0.85
   1  14  -2    1.88    0.40
  -1 -14   2    2.45    0.52
   0  14  -2   -0.07    0.33
   0  14  -2   -0.01    0.20
   0 -14   2   -0.11    0.37
  -1  14  -2    0.90    0.30
  -1  14  -2    0.61    0.19
   1 -14   2    0.67    0.37
  -2  14  -2   -0.01    0.27
  -2  14  -2   -0.16    0.20
   2 -14   2    0.14    0.35
  -3  14  -2    8.69    0.68
   3 -14   2    8.07    0.82
  -4  14  -2    1.70    0.37
  -4  14  -2    1.04    0.31
   4 -14   2    2.24    0.86
  -5  14  -2   15.22    0.97
  -5  14  -2   14.05    0.90
   4  13  -2    9.58    1.11
  -4 -13   2    7.26    1.01
   3  13  -2    1.79    0.52
  -3 -13   2    2.19    0.55
   2  13  -2    0.31    0.31
  -2 -13   2    0.86    0.36
   1  13  -2   -0.16    0.33
   1  13  -2    0.53    0.22
  -1 -13   2    0.56    0.33
   0  13  -2   27.75    1.32
   0  13  -2   24.92    1.10
   0 -13   2   26.02    1.39
  -1  13  -2    0.37    0.20
  -1  13  -2    0.09    0.16
  -2  13  -2   57.91    2.19
  -2  13  -2   55.11    2.32
   2 -13   2   57.01    2.42
  -3  13  -2    2.35    0.31
  -3  13  -2    3.01    0.43
   3 -13   2    2.57    0.42
  -4  13  -2    7.89    0.65
  -4  13  -2    6.20    0.54
   4 -13   2    7.66    0.74
  -5  13  -2    2.76    0.45
  -5  13  -2    2.04    0.36
  -6  13  -2    2.97    0.49
  -6  13  -2    3.10    0.46
   4  12  -2   10.12    1.04
  -4 -12   2    9.40    1.00
   3  12  -2    1.65    0.44
  -3 -12   2    2.42    0.48
   2  12  -2    0.95    0.31
   2  12  -2    0.69    0.26
  -2 -12   2    0.77    0.36
   1  12  -2   11.59    0.63
   1  12  -2   12.94    0.82
  -1 -12   2   12.41    0.88
   0  12  -2    5.37    0.37
   0  12  -2    5.66    0.52
   0 -12   2    5.14    0.56
  -1  12  -2    0.20    0.14
  -1  12  -2    0.47    0.19
   1 -12   2    0.17    0.25
  -2  12  -2    1.48    0.28
  -2  12  -2    2.14    0.27
   2 -12   2    2.02    0.36
  -3  12  -2   -0.02    0.18
  -3  12  -2   -0.04    0.37
   3 -12   2   -0.08    0.26
  -4  12  -2    4.08    0.46
   4 -12   2    2.96    0.44
  -5  12  -2    5.86    0.61
  -5  12  -2    5.40    0.51
   5 -12   2    6.42    0.70
  -6  12  -2   -0.12    0.37
  -6  12  -2    0.07    0.37
   5  11  -2   10.33    1.15
  -5 -11   2   11.89    1.04
   4  11  -2    6.82    0.84
  -4 -11   2    5.58    0.79
   3  11  -2    0.21    0.28
   3  11  -2    0.30    0.34
  -3 -11   2    1.02    0.38
   2  11  -2   18.81    0.87
  -2 -11   2   16.67    1.23
   1  11  -2    1.08    0.19
   1  11  -2    1.02    0.25
  -1 -11   2    1.07    0.30
   0  11  -2    2.09    0.30
   0  11  -2    1.76    0.22
   0 -11   2    1.82    0.33
  -1  11  -2    6.72    0.39
  -1  11  -2    6.47    0.48
   1 -11   2    6.89    0.56
  -2  11  -2    5.47    0.44
  -2  11  -2    5.47    0.38
   2 -11   2    5.47    0.51
  -3  11  -2    3.06    0.34
  -3  11  -2    4.07    0.40
   3 -11   2    3.62    0.46
  -4  11  -2    0.47    0.21
  -4  11  -2    0.61    0.22
   4 -11   2    0.12    0.28
  -5  11  -2    3.08    0.41
  -5  11  -2    4.26    0.51
   5 -11   2    3.69    0.55
  -6  11  -2   -0.04    0.34
  -6  11  -2    0.28    0.32
  -7  11  -2   -0.29    0.45
  -7  11  -2    0.48    0.46
   5  10  -2   20.32    1.40
  -5 -10   2   21.67    1.33
   4  10  -2   17.50    0.97
   4  10  -2   17.95    1.18
  -4 -10   2   17.76    1.14
   3  10  -2    0.16    0.24
   3  10  -2   -0.13    0.41
  -3 -10   2   -0.08    0.30
   2  10  -2    7.86    0.50
   2  10  -2    8.06    0.60
  -2 -10   2    7.32    0.67
   1  10  -2    0.69    0.14
   1  10  -2    0.56    0.18
  -1 -10   2    0.32    0.21
   0  10  -2    1.55    0.20
   0  10  -2    1.95    0.27
   0 -10   2    2.12    0.34
  -1  10  -2   13.18    0.61
  -1  10  -2   13.50    0.71
   1 -10   2   13.69    0.77
  -2  10  -2   38.30    1.58
  -2  10  -2   38.12    1.50
   2 -10   2   37.25    1.64
  -3  10  -2   -0.12    0.15
  -3  10  -2    0.12    0.17
   3 -10   2    0.07    0.21
  -4  10  -2   17.95    0.92
  -4  10  -2   17.54    0.89
   4 -10   2   17.73    0.95
  -5  10  -2    8.30    0.66
  -5  10  -2    8.94    0.64
   5 -10   2    8.60    0.69
  -6  10  -2    0.10    0.33
  -6  10  -2   -0.62    0.31
  -7  10  -2    3.37    0.53
  -7  10  -2    3.08    0.50
   6   9  -2   16.45    1.34
  -6  -9   2   15.69    1.19
  -6  -9   2   18.21    1.36
   5   9  -2    0.16    0.46
   5   9  -2    0.83    0.38
  -5  -9   2    1.07    0.42
   4   9  -2   16.95    1.05
   4   9  -2   18.33    0.95
  -4  -9   2   16.50    1.05
   3   9  -2    0.13    0.28
   3   9  -2    0.00    0.22
  -3  -9   2    0.30    0.24
   2   9  -2   29.39    1.37
   2   9  -2   29.17    1.24
  -2  -9   2   30.90    1.44
   1   9  -2    1.92    0.27
   1   9  -2    1.55    0.20
  -1  -9   2    1.49    0.27
   0   9  -2   93.15    3.44
   0   9  -2   90.36    3.31
   0  -9   2   91.09    3.51
  -1   9  -2    8.43    0.49
  -1   9  -2    8.67    0.44
   1  -9   2    9.02    0.57
  -2   9  -2   13.52    0.68
  -2   9  -2   13.80    0.64
   2  -9   2   13.09    0.73
  -3   9  -2    1.95    0.30
  -3   9  -2    2.41    0.25
   3  -9   2    2.20    0.34
  -4   9  -2   15.64    0.82
  -4   9  -2   15.39    0.79
   4  -9   2   15.76    0.87
  -5   9  -2    6.54    0.74
  -5   9  -2    5.62    0.53
   5  -9   2    5.93    0.56
  -6   9  -2   -0.23    0.28
  -6   9  -2    0.21    0.30
  -7   9  -2    0.69    0.43
  -7   9  -2    0.85    0.43
   6   8  -2   -0.04    0.55
   6   8  -2   -0.33    0.42
  -6  -8   2   -1.33    0.56
  -6  -8   2    0.34    0.43
  -6  -8   2    0.35    0.43
   5   8  -2   11.12    0.84
   5   8  -2   13.80    1.04
  -5  -8   2   12.86    0.92
   4   8  -2   17.20    1.08
   4   8  -2   17.93    0.94
  -4  -8   2   19.20    1.06
   3   8  -2  235.35    8.43
   3   8  -2  223.30    8.27
  -3  -8   2  232.52    8.44
   2   8  -2   29.59    1.33
   2   8  -2   28.63    1.20
  -2  -8   2   29.94    1.36
   1   8  -2    8.17    0.42
   1   8  -2    8.40    0.52
  -1  -8   2    8.43    0.43
  -1  -8   2    8.10    0.55
   0   8  -2    9.84    0.46
   0   8  -2   10.11    0.54
   0  -8   2   10.92    0.50
   0  -8   2   10.00    0.60
  -1   8  -2   68.13    2.60
  -1   8  -2   69.47    2.67
   1  -8   2   78.36    2.73
   1  -8   2   68.45    2.73
  -2   8  -2   63.24    2.29
  -2   8  -2   58.93    2.32
   2  -8   2   60.09    2.37
  -3   8  -2    0.79    0.16
  -3   8  -2    0.30    0.13
   3  -8   2    0.34    0.18
  -4   8  -2    0.26    0.18
  -4   8  -2    0.25    0.17
   4  -8   2    0.50    0.20
  -5   8  -2   -0.12    0.21
  -5   8  -2   -0.15    0.19
   5  -8   2    0.22    0.24
  -6   8  -2   37.37    1.66
  -6   8  -2   37.48    1.69
   6  -8   2   35.31    1.67
  -7   8  -2    4.01    0.57
  -7   8  -2    6.06    0.66
   6   7  -2    0.28    0.41
   6   7  -2    0.88    0.51
  -6  -7   2    1.83    0.42
  -6  -7   2    1.86    0.55
  -6  -7   2    1.11    0.40
   5   7  -2    0.21    0.29
   5   7  -2   -0.72    0.44
  -5  -7   2    0.22    0.44
  -5  -7   2    0.35    0.29
   4   7  -2    1.75    0.30
   4   7  -2    1.60    0.33
  -4  -7   2    1.74    0.34
   3   7  -2    3.84    0.36
   3   7  -2    4.54    0.45
  -3  -7   2    4.05    0.44
   2   7  -2   24.28    1.12
   2   7  -2   24.72    1.03
  -2  -7   2   24.90    1.16
  -2  -7   2   24.84    0.99
   1   7  -2   15.83    0.78
   1   7  -2   17.16    0.73
  -1  -7   2   17.88    0.70
  -1  -7   2   16.48    0.84
   0   7  -2   15.59    0.63
   0   7  -2   14.44    0.68
   0  -7   2   15.98    0.64
   0  -7   2   13.51    0.72
  -1   7  -2    1.62    0.18
  -1   7  -2    2.10    0.17
  -1   7  -2    1.86    0.30
   1  -7   2    2.08    0.23
   1  -7   2    1.60    0.23
  -2   7  -2    1.16    0.22
  -2   7  -2    1.30    0.19
  -2   7  -2    1.20    0.17
   2  -7   2    1.52    0.24
  -3   7  -2   17.04    0.79
  -3   7  -2   16.56    0.77
  -3   7  -2   16.55    0.78
   3  -7   2   14.95    0.79
  -4   7  -2    2.18    0.30
  -4   7  -2    2.12    0.31
   4  -7   2    1.78    0.26
  -5   7  -2    1.27    0.26
  -5   7  -2    0.88    0.22
   5  -7   2    0.80    0.25
  -6   7  -2   67.12    2.72
  -6   7  -2   67.81    2.71
   6  -7   2   64.19    2.63
  -7   7  -2    6.66    0.71
  -7   7  -2    7.60    0.66
   7   6  -2    1.65    0.54
  -7  -6   2    2.29    0.52
  -7  -6   2    1.67    0.63
  -7  -6   2    1.85    0.52
   6   6  -2    0.40    0.45
   6   6  -2    0.45    0.48
  -6  -6   2    0.66    0.56
  -6  -6   2    0.68    0.42
  -6  -6   2    1.06    0.50
   5   6  -2    6.76    0.60
   5   6  -2    7.92    0.72
  -5  -6   2    6.58    0.69
  -5  -6   2    5.71    0.60
   4   6  -2    0.33    0.22
   4   6  -2   -0.22    0.25
  -4  -6   2    0.12    0.20
   3   6  -2   11.64    0.70
   3   6  -2   11.14    0.62
  -3  -6   2   11.52    0.69
   2   6  -2   50.05    1.93
   2   6  -2   49.05    2.01
  -2  -6   2   54.49    1.89
  -2  -6   2   49.00    2.03
   1   6  -2  192.38    6.55
   1   6  -2  176.79    6.62
  -1  -6   2  196.85    6.53
  -1  -6   2  173.47    6.66
   0   6  -2   53.50    1.89
   0   6  -2   49.85    1.94
   0   6  -2   53.48    2.03
   0  -6   2   50.42    1.94
   0  -6   2   48.73    2.00
   0  -6   2   54.14    1.90
  -1   6  -2   30.08    1.13
  -1   6  -2   27.23    1.15
  -1   6  -2   29.48    1.22
   1  -6   2   30.80    1.16
   1  -6   2   28.56    1.18
  -2   6  -2   13.76    0.64
  -2   6  -2   13.67    0.65
  -2   6  -2   14.71    0.69
   2  -6   2   15.28    0.72
   2  -6   2   15.46    0.71
   2  -6   2   13.30    0.67
  -3   6  -2   77.15    2.92
  -3   6  -2   77.30    2.92
  -3   6  -2   79.28    2.91
  -4   6  -2   17.63    0.84
  -4   6  -2   16.76    0.83
  -4   6  -2   17.12    0.83
   4  -6   2   17.23    0.85
  -5   6  -2    9.84    0.62
  -5   6  -2    8.98    0.61
   5  -6   2    9.30    0.61
  -6   6  -2    1.98    0.34
  -6   6  -2    1.40    0.34
   6  -6   2    1.97    0.35
  -7   6  -2    1.20    0.41
  -7   6  -2    1.97    0.39
  -8   6  -2    0.17    0.47
  -8   6  -2    0.45    0.43
   7   5  -2    5.11    0.75
  -7  -5   2    6.51    0.74
  -7  -5   2    5.22    0.80
  -7  -5   2    6.45    0.78
   6   5  -2    7.71    0.89
   6   5  -2    9.16    0.87
  -6  -5   2    9.03    0.85
  -6  -5   2    6.39    0.89
  -6  -5   2    7.15    0.70
   5   5  -2    5.60    0.54
   5   5  -2    4.66    0.61
  -5  -5   2    4.32    0.60
  -5  -5   2    4.53    0.51
  -5  -5   2    5.20    0.54
   4   5  -2   48.65    2.00
   4   5  -2   49.23    2.10
  -4  -5   2   49.33    2.04
   3   5  -2   31.33    1.33
   3   5  -2   31.94    1.41
  -3  -5   2   32.27    1.39
   2   5  -2    1.64    0.24
   2   5  -2    2.03    0.22
  -2  -5   2    1.90    0.20
  -2  -5   2    1.79    0.22
   1   5  -2   58.52    2.07
   1   5  -2   57.06    2.18
   1   5  -2   52.54    2.14
  -1  -5   2   57.73    2.05
  -1  -5   2   56.51    2.10
   0   5  -2    0.41    0.15
   0   5  -2    0.42    0.10
   0   5  -2    0.41    0.08
   0  -5   2    0.44    0.11
   0  -5   2    0.43    0.09
   0  -5   2    0.30    0.11
  -1   5  -2   76.25    2.75
  -1   5  -2   70.50    2.70
  -1   5  -2   73.46    2.69
   1  -5   2   72.68    2.75
   1  -5   2   77.16    2.73
   1  -5   2   75.38    2.70
  -2   5  -2   10.99    0.55
  -2   5  -2   11.94    0.58
  -2   5  -2   13.04    0.58
   2  -5   2   13.05    0.61
   2  -5   2   12.66    0.61
   2  -5   2   12.55    0.61
  -3   5  -2    0.01    0.10
  -3   5  -2    0.10    0.14
  -3   5  -2    0.12    0.09
   3  -5   2    0.06    0.13
   3  -5   2    0.22    0.18
  -4   5  -2    4.37    0.40
  -4   5  -2    4.06    0.34
  -4   5  -2    3.70    0.34
   4  -5   2    4.19    0.37
  -5   5  -2   94.49    3.67
  -5   5  -2  100.02    3.72
   5  -5   2   96.14    3.66
  -6   5  -2    0.58    0.31
  -6   5  -2   -0.18    0.26
   6  -5   2   -0.19    0.26
  -7   5  -2    1.87    0.44
  -7   5  -2    1.59    0.39
  -8   5  -2    3.60    0.55
  -8   5  -2    2.44    0.54
   7   4  -2   32.97    1.72
  -7  -4   2   32.50    1.60
  -7  -4   2   31.49    1.77
  -7  -4   2   33.12    1.63
   6   4  -2    2.97    0.47
  -6  -4   2    3.30    0.46
  -6  -4   2    3.34    0.50
   5   4  -2    8.81    0.65
   5   4  -2    8.20    0.72
  -5  -4   2    8.55    0.68
  -5  -4   2    8.51    0.61
  -5  -4   2    8.35    0.61
   4   4  -2    9.56    0.65
   4   4  -2    9.03    0.58
  -4  -4   2    8.68    0.66
  -4  -4   2    9.19    0.58
   3   4  -2    1.93    0.27
   3   4  -2    1.95    0.25
  -3  -4   2    1.68    0.26
   2   4  -2   28.51    1.15
   2   4  -2   26.00    1.18
  -2  -4   2   29.08    1.17
  -2  -4   2   28.95    1.21
  -2  -4   2   30.21    1.12
   1   4  -2   73.47    2.68
   1   4  -2   73.17    2.73
   1   4  -2   75.59    2.77
  -1  -4   2   78.49    2.67
  -1  -4   2   72.73    2.75
  -1  -4   2   72.99    2.71
   0   4  -2   34.28    1.27
   0   4  -2   34.10    1.30
   0   4  -2   35.46    1.35
   0  -4   2   32.49    1.33
   0  -4   2   35.04    1.27
   0  -4   2   35.21    1.29
  -1   4  -2    0.31    0.09
  -1   4  -2    0.44    0.08
  -1   4  -2    0.29    0.07
   1  -4   2    0.23    0.07
   1  -4   2    0.29    0.08
   1  -4   2    0.40    0.09
  -2   4  -2  172.45    6.17
  -2   4  -2  177.41    6.20
  -2   4  -2  168.49    6.18
   2  -4   2  174.21    6.19
   2  -4   2  169.25    6.21
   2  -4   2  180.50    6.21
  -3   4  -2   82.40    3.20
  -3   4  -2   90.24    3.20
  -3   4  -2   85.70    3.28
   3  -4   2   86.31    3.23
   3  -4   2   87.62    3.22
  -4   4  -2    6.38    0.45
  -4   4  -2    6.23    0.43
  -4   4  -2    6.85    0.49
  -5   4  -2   31.23    1.40
  -5   4  -2   33.13    1.43
   5  -4   2   30.98    1.39
  -6   4  -2   25.25    1.39
  -6   4  -2   25.86    1.25
   6  -4   2   25.72    1.22
  -7   4  -2    0.48    0.35
  -7   4  -2   -0.28    0.37
  -8   4  -2    0.80    0.49
  -8   4  -2   -0.81    0.49
   7   3  -2    4.14    0.58
  -7  -3   2    4.49    0.63
  -7  -3   2    5.52    0.71
  -7  -3   2    5.45    0.82
   6   3  -2   25.51    1.32
  -6  -3   2   24.22    1.20
  -6  -3   2   23.94    1.26
  -6  -3   2   24.60    1.37
   5   3  -2    0.93    0.26
   5   3  -2    0.20    0.23
  -5  -3   2    0.39    0.22
  -5  -3   2    0.34    0.23
  -5  -3   2    0.48    0.24
   4   3  -2    2.34    0.33
   4   3  -2    2.23    0.30
  -4  -3   2    2.69    0.37
   3   3  -2   32.35    1.31
   3   3  -2   30.92    1.35
  -3  -3   2   28.80    1.37
  -3  -3   2   32.55    1.29
  -3  -3   2   32.64    1.32
  -3  -3   2   30.01    1.35
   2   3  -2   26.14    1.09
   2   3  -2   26.55    1.07
   2   3  -2   25.50    1.11
  -2  -3   2   25.19    1.08
  -2  -3   2   27.51    1.05
  -2  -3   2   26.92    1.09
  -2  -3   2   26.55    1.08
   1   3  -2   -0.29    0.07
   1   3  -2   -0.17    0.05
   1   3  -2   -0.14    0.08
  -1  -3   2   -0.11    0.05
  -1  -3   2   -0.14    0.06
  -1  -3   2   -0.23    0.07
   0   3  -2  211.33    7.59
   0   3  -2  203.28    7.60
   0   3  -2  229.37    7.65
   0  -3   2  216.72    7.59
   0  -3   2  221.00    7.60
   0  -3   2  217.67    7.65
  -1   3  -2  153.20    5.53
  -1   3  -2  155.53    5.54
  -1   3  -2  160.37    5.58
   1  -3   2  155.70    5.54
   1  -3   2  159.64    5.55
   1  -3   2  156.75    5.58
  -2   3  -2    8.97    0.44
  -2   3  -2    7.99    0.40
  -2   3  -2    8.40    0.42
   2  -3   2    8.50    0.44
   2  -3   2    8.45    0.43
  -3   3  -2   36.74    1.44
  -3   3  -2   38.26    1.48
  -3   3  -2   32.54    1.44
   3  -3   2   36.69    1.48
   3  -3   2   37.79    1.48
  -4   3  -2    7.92    0.54
  -4   3  -2    7.33    0.59
  -4   3  -2    7.43    0.48
  -4   3  -2    6.92    0.47
   4  -3   2    7.07    0.54
   4  -3   2    7.43    0.55
  -5   3  -2   44.74    1.83
  -5   3  -2   43.84    1.81
   5  -3   2   40.99    1.78
  -6   3  -2    4.09    0.52
  -6   3  -2    4.53    0.54
   6  -3   2    4.58    0.51
  -7   3  -2    3.62    0.53
  -7   3  -2    4.43    0.61
   7  -3   2    4.38    0.60
  -8   3  -2    0.73    0.43
  -8   3  -2    0.97    0.51
  -8  -2   2    1.49    0.65
  -8  -2   2    0.53    0.53
   7   2  -2   16.44    1.10
  -7  -2   2   17.11    1.06
  -7  -2   2   15.32    1.05
  -7  -2   2   14.77    1.17
   6   2  -2    8.14    0.71
  -6  -2   2    8.31    0.68
  -6  -2   2    7.45    0.60
  -6  -2   2    9.08    0.78
   5   2  -2    6.15    0.52
  -5  -2   2    4.69    0.50
  -5  -2   2    4.72    0.43
  -5  -2   2    5.41    0.51
   4   2  -2   20.08    1.02
   4   2  -2   20.86    0.99
  -4  -2   2   20.68    1.04
  -4  -2   2   21.41    0.99
  -4  -2   2   20.20    0.92
   3   2  -2   11.87    0.65
   3   2  -2   12.68    0.64
  -3  -2   2   12.34    0.67
  -3  -2   2   12.67    0.60
  -3  -2   2   12.21    0.62
  -3  -2   2   13.16    0.63
  -3  -2   2   11.73    0.65
   2   2  -2   53.96    1.99
   2   2  -2   51.02    1.99
   2   2  -2   51.26    2.03
  -2  -2   2   55.04    1.98
  -2  -2   2   51.90    1.97
  -2  -2   2   53.47    2.01
  -2  -2   2   53.45    1.98
   1   2  -2   12.27    0.56
   1   2  -2   13.36    0.56
   1   2  -2   12.77    0.54
  -1  -2   2   13.16    0.55
  -1  -2   2   14.30    0.57
   0   2  -2  273.80    9.32
   0   2  -2  262.60    9.39
   0   2  -2  258.37    9.33
   0  -2   2  258.49    9.28
   0  -2   2  266.43    9.29
   0  -2   2  270.86    9.32
  -1   2  -2  455.48   15.35
  -1   2  -2  432.86   15.41
  -1   2  -2  426.37   15.38
   1  -2   2  447.89   15.37
   1  -2   2  434.37   15.44
   1  -2   2  430.09   15.39
  -2   2  -2   56.43    2.09
  -2   2  -2   54.73    2.11
  -2   2  -2   58.92    2.14
   2  -2   2   56.14    2.12
   2  -2   2   58.90    2.11
   2  -2   2   56.22    2.14
  -3   2  -2    0.49    0.20
  -3   2  -2    0.61    0.17
  -3   2  -2    0.42    0.14
  -3   2  -2    0.38    0.12
  -3   2  -2    0.69    0.18
   3  -2   2    0.40    0.15
   3  -2   2    0.51    0.17
   3  -2   2    0.31    0.17
  -4   2  -2   11.15    0.65
  -4   2  -2    9.90    0.63
  -4   2  -2   10.28    0.58
  -4   2  -2   10.15    0.59
   4  -2   2   10.19    0.63
   4  -2   2   10.22    0.58
  -5   2  -2   42.27    1.79
  -5   2  -2   44.65    1.82
   5  -2   2   41.20    1.78
  -6   2  -2    8.85    0.69
  -6   2  -2    8.76    0.69
   6  -2   2   10.08    0.70
  -7   2  -2   -0.06    0.33
  -7   2  -2    1.09    0.40
  -7   2  -2    0.88    0.39
   7  -2   2   -0.30    0.36
  -8   2  -2    1.63    0.55
  -8   2  -2    1.64    0.49
  -8  -1   2    0.83    0.62
  -8  -1   2    0.61    0.50
   7   1  -2   16.38    1.08
  -7  -1   2   14.77    1.13
  -7  -1   2   16.37    1.03
   6   1  -2    5.36    0.60
  -6  -1   2    5.94    0.58
  -6  -1   2    4.30    0.48
  -6  -1   2    6.19    0.68
   5   1  -2    0.51    0.23
  -5  -1   2    0.69    0.26
  -5  -1   2    0.27    0.28
  -5  -1   2    0.62    0.17
  -5  -1   2    0.47    0.23
   4   1  -2    0.41    0.17
  -4  -1   2    0.22    0.15
  -4  -1   2    0.53    0.20
  -4  -1   2    0.41    0.19
  -4  -1   2    0.83    0.17
   3   1  -2    8.64    0.50
   3   1  -2    8.29    0.51
  -3  -1   2    8.07    0.51
  -3  -1   2    9.25    0.48
  -3  -1   2    9.06    0.53
  -3  -1   2    9.19    0.45
  -3  -1   2    9.51    0.53
   2   1  -2  180.69    6.52
   2   1  -2  184.38    6.47
   2   1  -2  172.72    6.54
  -2  -1   2  182.01    6.55
  -2  -1   2  187.26    6.47
  -2  -1   2  179.88    6.46
  -2  -1   2  192.23    6.51
  -2  -1   2  185.03    6.54
   1   1  -2    0.07    0.06
   1   1  -2    0.08    0.04
   1   1  -2    0.08    0.05
  -1  -1   2    0.02    0.04
  -1  -1   2    0.12    0.06
  -1  -1   2    0.10    0.04
  -1  -1   2    0.09    0.07
   0   1  -2  106.99    3.74
   0  -1   2  103.71    3.71
   0  -1   2  106.10    3.71
  -1   1  -2   -0.01    0.03
  -1   1  -2   -0.04    0.03
  -1   1  -2    0.07    0.07
   1  -1   2   -0.01    0.03
   1  -1   2    0.02    0.05
   1  -1   2   -0.14    0.06
  -2   1  -2   78.22    2.90
  -2   1  -2   82.52    2.89
  -2   1  -2   80.07    2.89
  -2   1  -2   76.99    2.91
  -2   1  -2   84.12    2.95
   2  -1   2   79.97    2.89
   2  -1   2   77.58    2.94
  -3   1  -2   37.93    1.53
  -3   1  -2   38.86    1.51
  -3   1  -2   39.22    1.56
  -3   1  -2   34.81    1.50
  -3   1  -2   38.90    1.51
   3  -1   2   38.40    1.51
   3  -1   2   38.68    1.55
   3  -1   2   39.33    1.54
  -4   1  -2   11.80    0.64
  -4   1  -2   11.52    0.62
  -4   1  -2   11.79    0.70
  -4   1  -2   11.81    0.68
   4  -1   2   11.66    0.65
  -5   1  -2    1.67    0.28
  -5   1  -2    1.64    0.27
   5  -1   2    1.65    0.30
  -6   1  -2    3.69    0.54
  -6   1  -2    3.57    0.49
   6  -1   2    3.82    0.50
  -7   1  -2   19.03    1.14
  -7   1  -2   19.74    1.18
  -7   1  -2   20.56    1.15
   7  -1   2   19.68    1.14
  -8   1  -2    0.66    0.42
  -8   1  -2    0.30    0.53
  -8   0   2   -0.22    0.55
  -8   0   2    0.41    0.49
  -7   0   2    5.50    0.70
  -7   0   2    7.52    0.81
   6   0  -2    1.02    0.34
  -6   0   2    1.05    0.33
  -6   0   2    1.69    0.26
  -6   0   2    1.54    0.43
   5   0  -2   26.90    1.28
  -5   0   2   27.73    1.14
  -5   0   2   24.28    1.29
  -5   0   2   28.27    1.20
  -5   0   2   26.22    1.25
   4   0  -2   42.23    1.56
   4   0  -2   38.79    1.67
  -4   0   2   37.12    1.69
  -4   0   2   40.52    1.55
  -4   0   2   43.74    1.59
  -4   0   2   37.44    1.65
   3   0  -2   13.96    0.69
   3   0  -2   14.00    0.59
   3   0  -2   13.72    0.72
  -3   0   2   13.76    0.58
  -3   0   2   13.85    0.69
  -3   0   2   12.90    0.67
  -3   0   2   11.72    0.67
  -3   0   2   14.52    0.74
  -3   0   2   14.25    0.61
   2   0  -2    8.42    0.44
   2   0  -2    8.90    0.47
  -2   0   2    8.97    0.44
  -2   0   2    8.97    0.37
  -2   0   2    8.57    0.46
   1   0  -2  272.89    9.31
   1   0  -2  263.54    9.28
   1   0  -2  258.03    9.25
  -1   0   2  269.21    9.31
  -1   0   2  278.65    9.31
  -1   0   2  261.75    9.28
  -1   0   2  247.54    9.27
  -1   0  -2  111.82    3.90
  -1   0  -2  107.01    3.82
  -1   0  -2  107.53    3.83
  -1   0  -2  109.57    3.81
   1   0   2  109.16    3.84
   1   0   2  104.97    3.82
   1   0   2  109.02    3.90
  -2   0  -2   23.86    0.95
  -2   0  -2   25.20    1.02
  -2   0  -2   24.32    0.97
  -2   0  -2   23.67    0.95
  -2   0  -2   25.00    0.94
   2   0   2   23.53    1.01
   2   0   2   24.33    0.97
   2   0   2   23.07    0.95
  -3   0  -2    1.10    0.20
  -3   0  -2    1.07    0.26
  -3   0  -2    1.02    0.17
  -3   0  -2    0.99    0.20
  -3   0  -2    0.90    0.18
   3   0   2    0.93    0.18
  -4   0  -2    7.35    0.51
  -4   0  -2    7.22    0.47
  -4   0  -2    7.59    0.50
   4   0   2    7.79    0.52
  -5   0  -2    5.67    0.51
  -5   0  -2    6.09    0.49
   5   0   2    6.22    0.50
  -6   0  -2   17.30    0.98
  -6   0  -2   16.71    0.96
  -6   0  -2   17.23    0.94
   6   0   2   14.98    0.96
  -7   0  -2    3.62    0.49
  -7   0  -2    3.76    0.57
  -7   0  -2    3.75    0.52
   7   0   2    3.82    0.56
  -8   0  -2   10.70    0.96
  -8   1   2   -0.08    0.57
  -8   1   2    0.35    0.50
  -7   1   2    0.79    0.44
  -7   1   2    1.15    0.39
   6  -1  -2    3.98    0.51
  -6   1   2    2.75    0.42
  -6   1   2    2.99    0.45
   5  -1  -2    2.10    0.33
   5  -1  -2    2.60    0.30
  -5   1   2    2.41    0.34
  -5   1   2    2.31    0.36
  -5   1   2    2.20    0.28
  -5   1   2    3.12    0.43
   4  -1  -2    0.47    0.16
   4  -1  -2    0.25    0.11
  -4   1   2    0.01    0.18
  -4   1   2    0.07    0.10
  -4   1   2   -0.10    0.14
  -4   1   2   -0.01    0.13
   3  -1  -2   82.20    3.18
   3  -1  -2   87.33    3.04
   3  -1  -2   87.61    3.22
  -3   1   2   85.21    3.17
  -3   1   2   90.53    3.05
  -3   1   2   81.40    3.17
  -3   1   2   86.37    3.22
  -3   1   2   85.82    3.04
  -3   1   2   78.50    3.19
   2  -1  -2  155.74    5.59
   2  -1  -2  154.38    5.57
  -2   1   2  156.15    5.56
  -2   1   2  154.72    5.56
  -2   1   2  156.14    5.59
   1  -1  -2   -0.01    0.06
   1  -1  -2    0.02    0.05
  -1   1   2    0.07    0.02
  -1   1   2   -0.01    0.05
  -1   1   2    0.16    0.07
   0  -1  -2  131.14    4.39
   0  -1  -2  122.46    4.32
   0  -1  -2  119.66    4.37
   0   1   2  126.84    4.39
   0   1   2  122.53    4.35
   0   1   2  119.23    4.31
  -1  -1  -2  278.62    9.64
  -1  -1  -2  262.56    9.64
  -1  -1  -2  293.98    9.71
  -1  -1  -2  273.06    9.60
   1   1   2  281.49    9.70
   1   1   2  264.18    9.63
   1   1   2  269.24    9.64
  -2  -1  -2    0.11    0.07
  -2  -1  -2    0.12    0.07
  -2  -1  -2    0.22    0.14
  -2  -1  -2   -0.05    0.09
   2   1   2   -0.03    0.10
   2   1   2    0.10    0.08
  -3  -1  -2    6.20    0.39
  -3  -1  -2    6.22    0.38
  -3  -1  -2    5.55    0.36
  -3  -1  -2    5.73    0.40
  -3  -1  -2    5.48    0.45
   3   1   2    5.43    0.40
   3   1   2    5.97    0.40
  -4  -1  -2    8.31    0.52
  -4  -1  -2    9.34    0.61
  -4  -1  -2    8.82    0.54
   4   1   2    9.18    0.58
  -5  -1  -2    0.55    0.26
  -5  -1  -2    0.73    0.23
  -5  -1  -2    0.06    0.22
   5   1   2    1.04    0.27
  -6  -1  -2   13.98    0.90
  -6  -1  -2   14.30    0.88
  -6  -1  -2   13.64    0.84
   6   1   2   13.83    0.90
  -7  -1  -2    1.70    0.47
  -7  -1  -2    1.10    0.45
  -7  -1  -2    0.60    0.37
   7   1   2    0.48    0.41
  -8   2   2    2.56    0.49
  -8   2   2    2.01    0.57
  -7   2   2    7.28    0.79
  -7   2   2    8.23    0.79
  -6   2   2    0.58    0.30
  -6   2   2   -0.36    0.29
  -6   2   2    0.31    0.18
   5  -2  -2    2.68    0.37
   5  -2  -2    2.95    0.27
  -5   2   2    2.74    0.32
  -5   2   2    2.70    0.27
  -5   2   2    2.05    0.32
  -5   2   2    2.05    0.35
   4  -2  -2    2.64    0.21
   4  -2  -2    2.55    0.33
  -4   2   2    2.55    0.22
  -4   2   2    2.40    0.31
  -4   2   2    2.50    0.32
  -4   2   2    2.57    0.21
   3  -2  -2   25.03    1.10
   3  -2  -2   22.57    1.03
   3  -2  -2   25.15    0.89
  -3   2   2   22.86    1.04
  -3   2   2   24.87    0.89
  -3   2   2   23.94    1.04
  -3   2   2   23.48    1.07
   2  -2  -2    0.17    0.10
   2  -2  -2    0.20    0.12
  -2   2   2    0.21    0.12
  -2   2   2    0.19    0.12
  -2   2   2    0.18    0.09
   1  -2  -2    2.43    0.15
   1  -2  -2    2.66    0.20
   1  -2  -2    2.53    0.18
   1  -2  -2    2.08    0.16
  -1   2   2    2.46    0.17
  -1   2   2    2.51    0.19
  -1   2   2    2.55    0.17
   0  -2  -2  811.74   28.07
   0  -2  -2  801.14   27.95
   0  -2  -2  824.58   28.03
   0   2   2  743.56   27.96
   0   2   2  787.36   27.99
  -1  -2  -2  577.83   21.16
  -1  -2  -2  586.76   21.16
  -1  -2  -2  606.89   21.16
  -1  -2  -2  658.59   21.20
   1   2   2  617.81   21.18
   1   2   2  592.35   21.27
   1   2   2  587.74   21.15
  -2  -2  -2    5.02    0.29
  -2  -2  -2    4.76    0.30
  -2  -2  -2    5.53    0.29
  -2  -2  -2    5.27    0.40
   2   2   2    5.58    0.30
   2   2   2    4.84    0.31
   2   2   2    4.97    0.37
  -3  -2  -2    3.68    0.30
  -3  -2  -2    4.38    0.34
  -3  -2  -2    4.46    0.35
  -3  -2  -2    3.44    0.31
   3   2   2    4.12    0.35
   3   2   2    3.56    0.36
   3   2   2    3.89    0.32
  -4  -2  -2    7.69    0.55
  -4  -2  -2    8.27    0.50
  -4  -2  -2    7.22    0.53
   4   2   2    7.38    0.52
   4   2   2    7.99    0.56
  -5  -2  -2   39.43    1.75
  -5  -2  -2   39.89    1.69
  -5  -2  -2   40.35    1.79
   5   2   2   40.02    1.77
  -6  -2  -2   36.90    1.73
  -6  -2  -2   35.99    1.73
  -6  -2  -2   36.44    1.64
   6   2   2   37.41    1.73
  -7  -2  -2   -0.02    0.36
  -7  -2  -2    0.23    0.42
   7   2   2   -0.09    0.41
  -8   3   2    4.02    0.58
  -8   3   2    2.70    0.62
  -7   3   2    0.93    0.40
  -7   3   2    0.36    0.42
  -6   3   2    5.04    0.51
  -6   3   2    4.50    0.59
  -6   3   2    5.04    0.36
  -5   3   2    1.39    0.28
  -5   3   2    1.64    0.32
  -5   3   2    1.42    0.22
   4  -3  -2   49.96    2.08
   4  -3  -2   53.52    1.87
  -4   3   2   50.37    2.07
  -4   3   2   53.18    1.86
  -4   3   2   49.06    2.09
   3  -3  -2   21.10    0.75
   3  -3  -2   18.55    0.88
  -3   3   2   20.31    0.73
  -3   3   2   19.36    0.89
  -3   3   2   19.12    0.92
   2  -3  -2   62.60    2.23
   2  -3  -2   62.70    2.38
   2  -3  -2   63.82    2.34
  -2   3   2   62.86    2.37
  -2   3   2   61.91    2.34
  -2   3   2   61.78    2.33
   1  -3  -2   44.44    1.65
   1  -3  -2   45.39    1.66
   1  -3  -2   46.07    1.66
   1  -3  -2   45.67    1.70
  -1   3   2   44.53    1.65
  -1   3   2   45.00    1.66
  -1   3   2   45.35    1.66
  -1   3   2   43.12    1.69
   0  -3  -2    0.07    0.07
   0  -3  -2    0.02    0.06
   0  -3  -2    0.01    0.03
   0  -3  -2    0.14    0.09
   0   3   2    0.03    0.02
   0   3   2    0.07    0.05
   0   3   2    0.08    0.08
  -1  -3  -2  123.96    4.39
  -1  -3  -2  118.66    4.26
  -1  -3  -2  112.66    4.21
  -1  -3  -2  122.93    4.39
   1   3   2  121.80    4.22
   1   3   2  114.73    4.27
   1   3   2  126.13    4.39
  -2  -3  -2   68.20    2.54
  -2  -3  -2   70.70    2.54
  -2  -3  -2   66.10    2.67
  -2  -3  -2   68.70    2.69
  -2  -3  -2   71.39    2.52
   2   3   2   67.61    2.68
   2   3   2   71.78    2.59
   2   3   2   72.63    2.54
  -3  -3  -2   24.03    1.00
  -3  -3  -2   24.91    1.00
  -3  -3  -2   22.22    1.11
  -3  -3  -2   24.43    0.99
   3   3   2   22.20    1.03
   3   3   2   22.19    1.10
   3   3   2   24.81    1.01
  -4  -3  -2    3.22    0.38
  -4  -3  -2    3.06    0.32
  -4  -3  -2    3.11    0.41
   4   3   2    3.80    0.39
   4   3   2    3.51    0.41
   4   3   2    3.69    0.34
  -5  -3  -2    0.47    0.22
  -5  -3  -2    0.92    0.27
  -5  -3  -2    0.68    0.27
   5   3   2    0.80    0.31
   5   3   2    0.39    0.29
  -6  -3  -2   -0.11    0.34
  -6  -3  -2    0.19    0.36
  -6  -3  -2   -0.14    0.29
   6   3   2    0.15    0.30
  -7  -3  -2    4.95    0.65
  -7  -3  -2    6.82    0.86
  -7  -3  -2    6.30    0.69
   7   3   2    5.83    0.81
  -8   4   2    0.38    0.45
  -8   4   2    1.52    0.56
  -7   4   2   -0.17    0.39
  -7   4   2    0.51    0.37
  -6   4   2    5.10    0.61
   5  -4  -2   44.95    1.62
  -5   4   2   44.94    1.60
  -5   4   2   43.34    1.91
  -5   4   2   41.66    1.87
   4  -4  -2   14.38    0.57
  -4   4   2   14.50    0.56
  -4   4   2   13.76    0.77
  -4   4   2   12.84    0.72
   3  -4  -2   14.53    0.59
  -3   4   2   14.40    0.73
  -3   4   2   14.38    0.71
  -3   4   2   15.07    0.58
   2  -4  -2   29.19    1.20
   2  -4  -2   30.23    1.25
   2  -4  -2   29.73    1.12
  -2   4   2   27.37    1.21
  -2   4   2   31.36    1.20
  -2   4   2   30.64    1.21
  -2   4   2   29.77    1.13
   1  -4  -2   10.41    0.49
   1  -4  -2    9.98    0.46
   1  -4  -2   10.16    0.48
   1  -4  -2   10.95    0.52
  -1   4   2   10.02    0.44
  -1   4   2   10.79    0.49
  -1   4   2   10.31    0.50
  -1   4   2   10.09    0.46
   0  -4  -2   21.40    0.84
   0  -4  -2   23.31    0.97
   0  -4  -2   23.84    0.92
   0  -4  -2   21.37    0.95
   0   4   2   22.20    0.89
   0   4   2   22.64    0.81
   0   4   2   23.10    0.95
   0   4   2   22.93    0.97
  -1  -4  -2   35.56    1.34
  -1  -4  -2   36.86    1.47
   1   4   2   37.36    1.28
   1   4   2   31.05    1.44
   1   4   2   34.96    1.35
  -2  -4  -2    2.43    0.23
  -2  -4  -2    2.92    0.19
  -2  -4  -2    2.42    0.21
  -2  -4  -2    2.55    0.32
   2   4   2    2.86    0.32
   2   4   2    2.86    0.22
  -3  -4  -2   12.87    0.61
  -3  -4  -2   12.05    0.72
  -3  -4  -2   12.11    0.59
   3   4   2   12.26    0.62
   3   4   2   12.49    0.74
   3   4   2   11.85    0.65
  -4  -4  -2   12.56    0.78
  -4  -4  -2   10.99    0.62
   4   4   2   11.76    0.76
   4   4   2   11.95    0.72
   4   4   2   11.81    0.64
  -5  -4  -2    6.34    0.59
  -5  -4  -2    5.27    0.58
  -5  -4  -2    4.56    0.45
   5   4   2    5.27    0.54
   5   4   2    4.81    0.55
  -6  -4  -2    1.17    0.43
  -6  -4  -2    0.82    0.38
  -6  -4  -2    0.45    0.30
   6   4   2    1.13    0.44
   6   4   2    0.33    0.38
  -7  -4  -2    1.24    0.58
  -7  -4  -2    1.82    0.52
  -7  -4  -2    2.09    0.47
  -8   5   2    4.33    0.65
  -8   5   2    4.91    0.73
  -7   5   2    1.58    0.45
  -7   5   2    0.48    0.40
  -6   5   2    4.43    0.56
  -6   5   2    3.36    0.51
   5  -5  -2   18.13    0.70
  -5   5   2   16.50    0.91
  -5   5   2   16.88    0.96
  -5   5   2   17.20    0.68
   4  -5  -2   70.87    2.48
  -4   5   2   69.17    2.46
  -4   5   2   67.51    2.67
  -4   5   2   65.43    2.70
   3  -5  -2   24.31    0.93
  -3   5   2   22.41    1.06
  -3   5   2   22.60    1.02
  -3   5   2   24.64    0.93
   2  -5  -2    1.13    0.16
   2  -5  -2    1.45    0.20
   2  -5  -2    1.07    0.19
  -2   5   2    1.48    0.22
  -2   5   2    1.12    0.17
  -2   5   2    1.62    0.19
  -2   5   2    1.52    0.20
   1  -5  -2    0.57    0.12
   1  -5  -2    0.43    0.12
   1  -5  -2    0.51    0.17
   1  -5  -2    0.60    0.14
  -1   5   2    0.47    0.11
  -1   5   2    0.38    0.12
  -1   5   2    0.58    0.11
  -1   5   2    0.56    0.09
   0  -5  -2    5.30    0.34
   0  -5  -2    5.84    0.26
   0  -5  -2    5.89    0.41
   0  -5  -2    5.47    0.44
   0   5   2    5.64    0.24
   0   5   2    5.69    0.41
  -1  -5  -2   30.58    1.19
  -1  -5  -2   29.36    1.30
  -1  -5  -2   31.11    1.09
   1   5   2   30.92    1.11
   1   5   2   29.10    1.29
   1   5   2   29.57    1.19
  -2  -5  -2   21.86    1.07
  -2  -5  -2   23.51    0.85
   2   5   2   23.19    0.90
   2   5   2   21.42    1.07
   2   5   2   21.11    0.96
  -3  -5  -2   -0.07    0.19
  -3  -5  -2    0.17    0.14
  -3  -5  -2    0.14    0.14
   3   5   2    0.00    0.18
   3   5   2    0.25    0.16
   3   5   2    0.30    0.17
  -4  -5  -2   39.50    1.78
  -4  -5  -2   38.00    1.59
   4   5   2   40.77    1.73
   4   5   2   39.52    1.79
   4   5   2   38.70    1.59
  -5  -5  -2    6.33    0.64
  -5  -5  -2    5.91    0.50
  -5  -5  -2    6.41    0.64
   5   5   2    5.33    0.62
   5   5   2    5.81    0.62
  -6  -5  -2    0.70    0.42
  -6  -5  -2    1.37    0.48
  -6  -5  -2    0.93    0.33
   6   5   2    1.92    0.47
  -7  -5  -2    3.56    0.65
  -7  -5  -2    5.50    0.75
  -8   6   2   20.15    1.32
  -8   6   2   22.29    1.38
  -7   6   2    0.55    0.39
  -7   6   2    0.13    0.39
  -6   6   2    0.11    0.30
   5  -6  -2    7.07    0.38
  -5   6   2    7.05    0.37
  -5   6   2    6.80    0.57
  -5   6   2    6.09    0.51
   4  -6  -2   37.90    1.44
  -4   6   2   36.19    1.62
  -4   6   2   39.33    1.43
  -4   6   2   36.29    1.58
   3  -6  -2    2.83    0.25
  -3   6   2    3.28    0.27
  -3   6   2    2.87    0.31
  -3   6   2    3.11    0.30
   2  -6  -2   26.87    1.10
   2  -6  -2   26.01    1.07
   2  -6  -2   27.59    1.10
  -2   6   2   25.34    1.12
  -2   6   2   25.78    1.08
  -2   6   2   25.98    1.11
   1  -6  -2    5.30    0.37
   1  -6  -2    5.56    0.40
   1  -6  -2    5.81    0.32
  -1   6   2    5.73    0.29
  -1   6   2    5.60    0.39
  -1   6   2    4.72    0.33
   0  -6  -2    4.46    0.37
   0  -6  -2    5.62    0.27
   0  -6  -2    5.79    0.49
   0   6   2    4.79    0.31
   0   6   2    5.25    0.23
  -1  -6  -2   32.86    1.48
  -1  -6  -2   36.97    1.26
   1   6   2   35.29    1.28
   1   6   2   33.76    1.38
  -2  -6  -2  110.44    3.82
  -2  -6  -2  105.11    4.11
   2   6   2  110.88    3.87
   2   6   2  104.51    3.98
  -3  -6  -2   18.60    1.07
  -3  -6  -2   21.42    0.90
  -3  -6  -2   20.71    0.84
   3   6   2   19.74    1.08
   3   6   2   22.64    0.92
   3   6   2   19.61    0.99
  -4  -6  -2    8.69    0.53
  -4  -6  -2    8.04    0.66
   4   6   2    8.90    0.54
   4   6   2    8.88    0.66
  -5  -6  -2   -0.23    0.24
  -5  -6  -2    0.23    0.35
   5   6   2   -0.63    0.36
  -6  -6  -2    1.23    0.56
  -6  -6  -2    3.05    0.52
  -6  -6  -2    2.39    0.41
   6   6   2    2.14    0.55
  -7   7   2    9.48    0.79
  -7   7   2    9.52    0.89
  -6   7   2   -0.32    0.26
  -6   7   2   -0.36    0.32
   5  -7  -2    1.11    0.20
  -5   7   2    0.82    0.26
  -5   7   2    1.52    0.29
   4  -7  -2   52.50    1.96
  -4   7   2   50.77    2.13
  -4   7   2   51.45    1.94
  -4   7   2   51.26    2.08
   3  -7  -2   19.68    0.85
   3  -7  -2   19.23    0.87
  -3   7   2   18.26    0.87
  -3   7   2   19.79    0.95
  -3   7   2   19.54    0.86
   2  -7  -2   19.90    0.89
   2  -7  -2   20.80    0.91
  -2   7   2   19.57    0.83
  -2   7   2   18.39    0.90
  -2   7   2   19.61    0.90
  -2   7   2   19.70    0.90
   1  -7  -2   18.78    0.94
   1  -7  -2   17.34    0.74
   1  -7  -2   16.48    0.80
  -1   7   2   17.52    0.69
  -1   7   2   17.03    0.92
  -1   7   2   15.67    0.77
   0  -7  -2   12.09    0.49
   0  -7  -2   11.31    0.64
   0   7   2   11.38    0.46
   0   7   2   10.46    0.55
  -1  -7  -2   15.84    0.86
  -1  -7  -2   16.76    0.63
   1   7   2   17.04    0.65
   1   7   2   15.50    0.76
  -2  -7  -2   63.41    2.16
  -2  -7  -2   56.26    2.45
   2   7   2   62.87    2.21
   2   7   2   56.60    2.34
  -3  -7  -2    3.03    0.32
  -3  -7  -2    2.88    0.26
  -3  -7  -2    2.48    0.39
   3   7   2    3.49    0.35
   3   7   2    2.62    0.39
  -4  -7  -2    0.87    0.29
  -4  -7  -2    0.75    0.22
   4   7   2    0.71    0.23
   4   7   2    0.64    0.31
  -5  -7  -2    2.51    0.49
  -5  -7  -2    2.76    0.35
   5   7   2    3.24    0.55
  -6  -7  -2    5.73    0.76
  -6  -7  -2    6.20    0.92
   6   7   2    6.82    1.00
  -7   8   2    0.26    0.43
  -7   8   2    0.24    0.44
  -6   8   2    6.78    0.71
  -6   8   2    6.47    0.65
  -5   8   2    2.77    0.39
  -5   8   2    3.10    0.43
   4  -8  -2    1.38    0.23
   4  -8  -2    1.38    0.27
  -4   8   2    1.50    0.25
  -4   8   2    1.33    0.28
  -4   8   2    1.07    0.24
   3  -8  -2   63.24    2.36
   3  -8  -2   60.56    2.34
  -3   8   2   61.05    2.35
  -3   8   2   59.20    2.35
  -3   8   2   62.24    2.44
   2  -8  -2    8.79    0.51
   2  -8  -2    8.83    0.54
  -2   8   2    9.27    0.46
  -2   8   2    9.29    0.57
  -2   8   2    7.92    0.51
   1  -8  -2    0.10    0.16
   1  -8  -2    0.27    0.15
  -1   8   2    0.35    0.10
  -1   8   2    0.34    0.12
   0  -8  -2    1.94    0.21
   0  -8  -2    1.49    0.27
   0   8   2    1.18    0.18
   0   8   2    1.69    0.15
  -1  -8  -2    2.93    0.38
  -1  -8  -2    3.84    0.23
   1   8   2    3.16    0.32
   1   8   2    3.71    0.24
  -2  -8  -2    0.27    0.26
   2   8   2    0.84    0.19
   2   8   2    0.37    0.15
  -3  -8  -2    0.11    0.18
  -3  -8  -2    0.02    0.24
   3   8   2   -0.06    0.23
   3   8   2    0.25    0.20
  -4  -8  -2    0.10    0.21
  -4  -8  -2   -0.81    0.34
   4   8   2   -0.06    0.23
   4   8   2    0.02    0.32
  -5  -8  -2    9.76    0.96
   5   8   2   11.16    0.95
  -6  -8  -2    7.95    1.13
  -6  -8  -2    4.98    0.71
   6   8   2    5.35    0.81
  -7   9   2   17.31    1.09
  -7   9   2   16.64    1.11
  -6   9   2    7.88    0.71
  -6   9   2    7.79    0.74
  -5   9   2    1.74    0.35
  -5   9   2    1.98    0.34
   4  -9  -2   37.16    1.58
  -4   9   2   39.39    1.71
  -4   9   2   40.29    1.65
   3  -9  -2   31.14    1.34
  -3   9   2   32.00    1.43
  -3   9   2   32.84    1.34
   2  -9  -2    1.41    0.23
  -2   9   2    1.72    0.21
  -2   9   2    2.11    0.29
   1  -9  -2   46.96    1.77
   1  -9  -2   43.51    1.88
  -1   9   2   44.04    1.83
  -1   9   2   47.62    1.69
   0  -9  -2   12.07    0.76
   0  -9  -2   13.00    0.59
   0   9   2   12.88    0.68
   0   9   2   13.31    0.54
  -1  -9  -2   28.12    1.05
  -1  -9  -2   26.61    1.34
   1   9   2   28.54    1.06
   1   9   2   25.76    1.21
  -2  -9  -2   43.98    2.00
   2   9   2   46.30    1.69
   2   9   2   43.69    1.88
  -3  -9  -2   23.55    0.99
  -3  -9  -2   23.08    1.31
   3   9   2   21.91    1.16
  -4  -9  -2   11.15    0.95
   4   9   2   11.61    0.98
  -5  -9  -2    3.30    0.62
   5   9   2    3.24    0.60
  -7  10   2    9.54    0.92
  -7  10   2   13.78    1.01
  -6  10   2   -0.05    0.35
  -6  10   2   -0.28    0.35
  -5  10   2   10.04    0.75
  -5  10   2   11.65    0.75
   4 -10  -2    0.33    0.23
  -4  10   2    0.89    0.27
  -4  10   2    0.70    0.22
   3 -10  -2    9.96    0.61
  -3  10   2    9.86    0.54
  -3  10   2    9.21    0.61
   2 -10  -2    1.95    0.31
  -2  10   2    2.10    0.25
  -2  10   2    2.71    0.32
   1 -10  -2   47.35    1.84
   1 -10  -2   47.84    2.01
  -1  10   2   46.53    1.76
  -1  10   2   48.29    1.94
   0 -10  -2    3.18    0.33
   0 -10  -2    3.53    0.45
   0  10   2    3.26    0.24
   0  10   2    2.65    0.31
  -1 -10  -2    0.48    0.29
   1  10   2    0.42    0.19
   1  10   2    0.24    0.14
  -2 -10  -2   25.23    1.83
   2  10   2   25.13    1.25
  -3 -10  -2    6.55    0.75
  -4 -10  -2    1.50    0.47
   4  10   2    2.29    0.48
  -5 -10  -2    0.14    0.53
   5  10   2   -0.29    0.56
  -6  11   2    3.26    0.47
  -6  11   2    3.08    0.55
  -5  11   2    1.53    0.36
  -5  11   2    1.66    0.35
  -4  11   2    0.15    0.24
  -4  11   2   -0.31    0.20
   3 -11  -2   17.11    0.93
  -3  11   2   17.41    0.83
  -3  11   2   19.21    0.96
   2 -11  -2   22.30    1.08
  -2  11   2   20.32    0.88
  -2  11   2   20.58    1.02
   1 -11  -2    3.63    0.48
  -1  11   2    3.62    0.40
  -1  11   2    4.28    0.27
   0 -11  -2   16.37    0.99
   0  11   2   17.09    0.71
   0  11   2   17.03    0.89
   1  11   2    0.92    0.28
  -2 -11  -2    4.25    0.57
   2  11   2    3.69    0.53
  -3 -11  -2   28.40    1.60
   3  11   2   29.59    1.51
  -4 -11  -2    1.36    0.52
   4  11   2    3.05    0.57
  -6  12   2    3.31    0.56
  -6  12   2    2.99    0.47
  -5  12   2    8.35    0.67
  -5  12   2    8.53    0.72
   4 -12  -2   11.28    0.89
  -4  12   2   13.00    0.84
  -4  12   2   13.00    0.75
   3 -12  -2   28.66    1.37
  -3  12   2   28.57    1.36
  -3  12   2   29.16    1.23
   2 -12  -2   13.38    0.89
  -2  12   2   13.90    0.80
  -2  12   2   14.02    0.65
   1 -12  -2    0.44    0.30
  -1  12   2    0.47    0.14
  -1  12   2   -0.07    0.21
   0 -12  -2   -0.24    0.36
   0  12   2    0.20    0.25
  -1 -12  -2    2.13    0.47
   1  12   2    2.53    0.39
  -2 -12  -2   18.40    1.18
   2  12   2   18.14    1.07
  -3 -12  -2    1.46    0.51
   3  12   2    1.62    0.44
  -4 -12  -2   11.96    1.14
   4  12   2   14.46    1.16
  -5  13   2    2.06    0.42
  -5  13   2    1.87    0.45
  -4  13   2    2.00    0.58
  -4  13   2    1.54    0.35
   3 -13  -2    2.23    0.40
  -3  13   2    1.98    0.36
  -3  13   2    2.30    0.29
   2 -13  -2    0.61    0.35
  -2  13   2    0.59    0.24
   1 -13  -2    1.56    0.41
  -1  13   2    1.15    0.26
   0 -13  -2   23.45    1.33
   0  13   2   21.35    1.16
  -1 -13  -2   28.71    1.56
   1  13   2   28.78    1.45
  -2 -13  -2    9.79    0.99
   2  13   2    9.77    0.83
  -3 -13  -2   19.12    1.39
   3  13   2   19.73    1.28
  -4  14   2    5.95    0.75
  -4  14   2    6.97    0.65
  -3  14   2    3.20    0.47
   2 -14  -2    3.52    0.55
  -2  14   2    3.82    0.50
   1 -14  -2    3.71    0.55
  -1  14   2    3.68    0.56
   0 -14  -2    3.11    0.58
   0  14   2    2.12    0.38
  -1 -14  -2    0.93    0.51
   1  14   2    0.22    0.36
  -2 -14  -2    5.55    0.82
   2  14   2    5.77    0.80
  -3  15   2    2.24    0.46
   2 -15  -2    0.12    0.46
  -2  15   2    0.02    0.36
   1 -15  -2    0.62    0.49
  -1  15   2    1.11    0.38
   0 -15  -2   10.03    1.06
   0  15   2   11.90    0.94
   1  16  -3    6.50    0.71
  -1 -16   3    4.41    0.74
   0  16  -3    1.81    0.49
   0 -16   3    2.34    0.61
  -1  16  -3    0.95    0.36
   1 -16   3   -0.55    0.50
  -2  16  -3    0.10    0.38
  -2  16  -3   -0.10    0.28
   2 -16   3    0.33    0.50
  -3  16  -3    8.63    0.79
  -3  16  -3    7.96    0.66
   3 -16   3   10.63    1.03
   2  15  -3   11.55    0.98
  -2 -15   3   12.00    1.13
   1  15  -3   15.46    1.12
  -1 -15   3   17.18    1.25
   0  15  -3   30.88    1.58
   0 -15   3   30.80    1.68
  -1  15  -3    8.56    0.57
  -1  15  -3    9.68    0.76
   1 -15   3    8.22    0.85
  -2  15  -3    0.78    0.30
   2 -15   3    1.31    0.48
  -3  15  -3   13.89    0.88
  -3  15  -3   15.06    0.81
   3 -15   3   14.60    1.07
  -4  15  -3   -0.23    0.35
  -4  15  -3    0.14    0.31
   4 -15   3    0.37    0.51
   3  14  -3    6.80    0.95
  -3 -14   3    9.75    1.02
   2  14  -3   10.48    0.96
  -2 -14   3   12.55    1.04
   1  14  -3   18.02    0.93
   1  14  -3   17.87    1.13
  -1 -14   3   19.22    1.23
   0  14  -3    9.65    0.60
   0  14  -3   11.47    0.83
   0 -14   3   11.62    0.86
  -1  14  -3    5.60    0.43
  -1  14  -3    5.67    0.59
   1 -14   3    5.21    0.67
  -2  14  -3   53.64    2.12
  -2  14  -3   56.47    2.29
   2 -14   3   52.45    2.39
  -3  14  -3    2.64    0.41
  -3  14  -3    1.94    0.30
   3 -14   3    2.56    0.48
  -4  14  -3   21.45    1.04
  -4  14  -3   19.55    1.06
   4 -14   3   19.34    1.23
  -5  14  -3    4.89    0.61
  -5  14  -3    5.67    0.66
   4  13  -3    1.06    0.62
  -4 -13   3    0.02    0.50
   3  13  -3    1.56    0.52
  -3 -13   3    2.29    0.54
   2  13  -3    0.37    0.28
   2  13  -3   -0.03    0.38
  -2 -13   3    0.72    0.41
   1  13  -3   27.18    1.38
   1  13  -3   25.57    1.16
  -1 -13   3   26.79    1.44
   0  13  -3    4.43    0.37
   0  13  -3    5.40    0.57
   0 -13   3    4.33    0.61
  -1  13  -3    2.51    0.34
  -1  13  -3    2.36    0.30
  -2  13  -3    3.07    0.34
  -2  13  -3    3.06    0.43
   2 -13   3    2.72    0.43
  -3  13  -3   14.13    0.82
  -3  13  -3   13.66    0.75
   3 -13   3   14.50    0.93
  -4  13  -3    2.38    0.37
  -4  13  -3    3.34    0.43
   4 -13   3    2.15    0.45
  -5  13  -3    0.07    0.28
  -5  13  -3    0.75    0.34
   5 -13   3    0.24    0.57
  -6  13  -3    0.40    0.37
  -6  13  -3    0.02    0.38
   4  12  -3   19.13    1.35
  -4 -12   3   18.76    1.29
   3  12  -3   12.69    0.99
   3  12  -3   13.19    0.81
  -3 -12   3   13.09    1.00
   2  12  -3    2.41    0.42
  -2 -12   3    2.42    0.42
   1  12  -3    2.02    0.33
   1  12  -3    2.95    0.33
  -1 -12   3    2.62    0.41
   0  12  -3   23.07    1.01
   0  12  -3   24.44    1.17
   0 -12   3   24.32    1.27
  -1  12  -3    8.93    0.58
  -1  12  -3    7.56    0.45
   1 -12   3    7.47    0.64
  -2  12  -3    7.58    0.47
  -2  12  -3    7.41    0.55
   2 -12   3    7.46    0.65
  -3  12  -3    0.58    0.18
  -3  12  -3    0.14    0.22
   3 -12   3    0.33    0.30
  -4  12  -3   18.10    0.91
  -4  12  -3   18.46    0.96
   4 -12   3   16.54    1.05
  -5  12  -3    5.98    0.57
  -5  12  -3    6.58    0.59
   5 -12   3    6.19    0.74
  -6  12  -3    1.02    0.38
  -6  12  -3    1.06    0.40
   5  11  -3    1.90    0.62
  -5 -11   3    1.73    0.53
   4  11  -3    1.24    0.47
   4  11  -3    1.31    0.40
  -4 -11   3    2.18    0.45
   3  11  -3   16.69    0.90
   3  11  -3   17.33    1.06
  -3 -11   3   15.81    1.05
   2  11  -3    0.30    0.20
   2  11  -3    0.16    0.30
   1  11  -3   20.17    0.92
   1  11  -3   21.33    1.07
  -1 -11   3   21.69    1.13
   0  11  -3    4.24    0.42
   0  11  -3    3.84    0.30
   0 -11   3    3.11    0.46
  -1  11  -3   36.34    1.43
  -1  11  -3   36.29    1.53
   1 -11   3   35.14    1.62
  -2  11  -3   15.48    0.74
  -2  11  -3   16.04    0.82
   2 -11   3   15.25    0.88
  -3  11  -3   10.98    0.64
  -3  11  -3   10.58    0.61
   3 -11   3   10.87    0.73
  -4  11  -3    0.22    0.21
  -4  11  -3    0.52    0.24
   4 -11   3    0.28    0.29
  -5  11  -3    4.89    0.52
  -5  11  -3    5.01    0.53
   5 -11   3    4.60    0.60
  -6  11  -3   10.09    0.79
  -6  11  -3   10.30    0.78
  -7  11  -3    5.98    0.65
   5  10  -3   16.71    1.06
   5  10  -3   17.21    1.20
  -5 -10   3   15.51    1.15
   4  10  -3   12.79    0.91
   4  10  -3   11.87    0.81
  -4 -10   3   10.99    0.91
   3  10  -3   36.54    1.53
  -3 -10   3   33.30    2.07
   2  10  -3   11.69    0.64
   2  10  -3   11.25    0.78
  -2 -10   3   13.13    0.84
   1  10  -3    1.85    0.25
   1  10  -3    1.24    0.25
  -1 -10   3    2.20    0.35
   0  10  -3    0.97    0.23
   0  10  -3    0.94    0.15
   0 -10   3    1.14    0.26
  -1  10  -3   96.79    3.62
  -1  10  -3   97.27    3.52
   1 -10   3   95.67    3.71
  -2  10  -3    6.93    0.42
  -2  10  -3    6.75    0.44
   2 -10   3    7.27    0.54
  -3  10  -3    6.15    0.46
  -3  10  -3    6.48    0.43
   3 -10   3    6.01    0.53
  -4  10  -3    1.25    0.23
  -4  10  -3    0.89    0.23
   4 -10   3    1.11    0.30
  -5  10  -3    4.33    0.46
  -5  10  -3    4.43    0.47
   5 -10   3    5.31    0.58
  -6  10  -3   -0.15    0.31
  -6  10  -3    0.74    0.32
  -7  10  -3    4.56    0.57
  -7  10  -3    6.77    0.76
   6   9  -3    0.51    0.51
   6   9  -3    0.47    0.66
  -6  -9   3    1.04    0.50
  -6  -9   3    0.60    0.48
  -6  -9   3    2.52    0.71
   5   9  -3   21.92    1.20
   5   9  -3   20.10    1.29
  -5  -9   3   21.86    1.29
   4   9  -3    6.00    0.58
   4   9  -3    4.80    0.69
  -4  -9   3    4.37    0.87
   3   9  -3    1.20    0.30
   3   9  -3    1.02    0.24
  -3  -9   3    1.44    0.31
   2   9  -3    7.70    0.60
   2   9  -3    8.51    0.50
  -2  -9   3    8.81    0.64
   1   9  -3   16.09    0.82
   1   9  -3   16.34    0.72
  -1  -9   3   15.96    0.88
   0   9  -3   12.63    0.57
   0   9  -3   13.19    0.67
   0  -9   3   11.66    0.70
  -1   9  -3    3.28    0.31
  -1   9  -3    3.87    0.26
   1  -9   3    3.70    0.37
  -2   9  -3    5.01    0.33
  -2   9  -3    4.73    0.36
   2  -9   3    4.55    0.43
  -3   9  -3   14.79    0.71
  -3   9  -3   14.15    0.72
   3  -9   3   14.08    0.80
  -4   9  -3    1.34    0.24
  -4   9  -3    1.51    0.24
   4  -9   3    1.59    0.31
  -5   9  -3   16.23    0.85
  -5   9  -3   13.49    0.93
   5  -9   3   15.30    0.89
  -6   9  -3   -0.46    0.28
   6  -9   3    0.07    0.36
  -7   9  -3   31.29    1.58
  -7   9  -3   30.82    1.54
   6   8  -3    2.11    0.48
   6   8  -3    1.98    0.56
  -6  -8   3    2.24    0.48
  -6  -8   3    2.82    0.59
  -6  -8   3    1.25    0.46
   5   8  -3    5.91    0.67
   5   8  -3    7.28    0.82
  -5  -8   3    7.34    0.71
  -5  -8   3    4.85    0.71
   4   8  -3    2.40    0.35
   4   8  -3    2.57    0.42
  -4  -8   3    2.21    0.37
   3   8  -3    1.24    0.23
   3   8  -3    1.12    0.26
  -3  -8   3    1.10    0.28
   2   8  -3   12.90    0.70
   2   8  -3   12.01    0.62
  -2  -8   3   11.93    0.73
   1   8  -3   24.41    0.97
   1   8  -3   23.03    1.05
  -1  -8   3   22.90    1.10
   0   8  -3   16.08    0.70
   0   8  -3   16.55    0.78
   0  -8   3   16.30    0.83
   0  -8   3   17.50    0.74
  -1   8  -3   92.41    3.27
  -1   8  -3   88.98    3.32
   1  -8   3   88.09    3.40
  -2   8  -3   34.37    1.39
  -2   8  -3   35.92    1.37
   2  -8   3   32.78    1.46
  -3   8  -3    1.06    0.18
  -3   8  -3    1.33    0.21
   3  -8   3    1.20    0.25
  -4   8  -3    3.95    0.37
  -4   8  -3    4.55    0.39
   4  -8   3    4.33    0.44
  -5   8  -3   12.15    0.73
  -5   8  -3   13.54    0.75
   5  -8   3   13.19    0.78
  -6   8  -3   11.13    0.73
  -6   8  -3    9.70    0.69
   6  -8   3    9.00    0.76
  -7   8  -3   18.54    1.11
  -7   8  -3   18.55    1.12
   6   7  -3   -0.19    0.41
   6   7  -3    0.48    0.50
  -6  -7   3    0.27    0.37
  -6  -7   3   -0.60    0.36
  -6  -7   3   -0.67    0.53
   5   7  -3   45.14    2.07
   5   7  -3   42.00    1.88
  -5  -7   3   41.39    2.02
  -5  -7   3   42.72    1.92
   4   7  -3   37.63    1.77
   4   7  -3   39.24    1.66
  -4  -7   3   37.94    1.71
   3   7  -3    0.81    0.20
   3   7  -3    1.09    0.26
  -3  -7   3    1.08    0.24
   2   7  -3    7.24    0.48
   2   7  -3    7.01    0.42
  -2  -7   3    7.21    0.51
   1   7  -3   31.89    1.36
   1   7  -3   32.79    1.28
  -1  -7   3   31.28    1.40
  -1  -7   3   34.97    1.27
   0   7  -3    0.32    0.10
   0  -7   3    0.33    0.11
   0  -7   3    0.27    0.12
  -1   7  -3    3.86    0.28
  -1   7  -3    4.07    0.26
   1  -7   3    3.74    0.31
   1  -7   3    4.33    0.31
  -2   7  -3    9.07    0.48
  -2   7  -3    9.85    0.48
   2  -7   3    9.41    0.55
  -3   7  -3   12.10    0.61
  -3   7  -3   12.33    0.62
   3  -7   3   11.97    0.67
  -4   7  -3    1.16    0.23
  -4   7  -3    0.99    0.21
   4  -7   3    1.32    0.25
  -5   7  -3   29.85    1.38
  -5   7  -3   32.81    1.39
   5  -7   3   30.89    1.42
  -6   7  -3    0.46    0.29
  -6   7  -3    0.25    0.28
   6  -7   3    0.48    0.31
  -7   7  -3    3.91    0.55
  -7   7  -3    3.88    0.52
   7   6  -3    0.78    0.54
  -7  -6   3    0.99    0.50
  -7  -6   3   -0.77    0.59
  -7  -6   3    0.45    0.47
   6   6  -3    0.05    0.36
   6   6  -3   -0.15    0.46
  -6  -6   3    0.73    0.50
  -6  -6   3   -0.12    0.36
  -6  -6   3    0.69    0.34
   5   6  -3    0.68    0.32
   5   6  -3    1.00    0.31
  -5  -6   3    1.37    0.36
  -5  -6   3    1.43    0.31
   4   6  -3   31.77    1.52
   4   6  -3   32.22    1.41
  -4  -6   3   30.60    1.42
   3   6  -3   26.22    1.16
   3   6  -3   26.70    1.26
  -3  -6   3   26.85    1.22
   2   6  -3    0.58    0.16
   2   6  -3    0.83    0.14
  -2  -6   3    0.73    0.14
  -2  -6   3    0.54    0.16
   1   6  -3   57.45    2.08
   1   6  -3   53.24    2.13
  -1  -6   3   52.18    2.16
  -1  -6   3   59.52    2.05
   0   6  -3   88.89    3.17
   0   6  -3   78.34    3.08
   0   6  -3   85.85    3.04
   0  -6   3   79.88    3.14
   0  -6   3   86.09    3.08
   0  -6   3   86.77    3.04
  -1   6  -3   42.75    1.60
  -1   6  -3   35.02    1.53
  -1   6  -3   35.89    1.57
   1  -6   3   42.62    1.55
   1  -6   3   38.82    1.59
   1  -6   3   42.93    1.53
  -2   6  -3  147.40    5.51
  -2   6  -3  161.88    5.57
  -2   6  -3  149.39    5.51
   2  -6   3  161.08    5.55
   2  -6   3  150.29    5.59
  -3   6  -3    6.18    0.38
  -3   6  -3    6.08    0.43
  -3   6  -3    5.29    0.36
   3  -6   3    6.09    0.43
  -4   6  -3    0.13    0.13
  -4   6  -3    0.08    0.13
   4  -6   3   -0.13    0.17
  -5   6  -3   16.00    0.86
  -5   6  -3   16.93    0.86
   5  -6   3   16.43    0.89
  -6   6  -3   22.53    1.15
  -6   6  -3   22.30    1.13
   6  -6   3   21.03    1.14
  -7   6  -3   11.49    0.87
  -7   6  -3   10.64    0.76
  -8   6  -3    7.07    1.00
  -8   6  -3    5.26    0.70
   7   5  -3    3.58    0.59
  -7  -5   3    3.52    0.73
  -7  -5   3    3.68    0.55
  -7  -5   3    3.42    0.53
   6   5  -3    1.55    0.49
   6   5  -3    0.69    0.40
  -6  -5   3    0.79    0.35
  -6  -5   3    0.68    0.30
  -6  -5   3    1.29    0.46
   5   5  -3    0.77    0.34
   5   5  -3    1.03    0.30
  -5  -5   3    1.10    0.26
  -5  -5   3    1.09    0.36
   4   5  -3    6.84    0.51
   4   5  -3    6.11    0.54
  -4  -5   3    6.64    0.50
  -4  -5   3    6.24    0.56
   3   5  -3   13.14    0.69
   3   5  -3   14.03    0.75
  -3  -5   3   13.53    0.71
   2   5  -3    0.05    0.09
   2   5  -3    0.09    0.16
   2   5  -3    0.04    0.12
  -2  -5   3   -0.12    0.11
  -2  -5   3    0.08    0.16
  -2  -5   3    0.00    0.10
   1   5  -3    0.36    0.10
   1   5  -3    0.49    0.10
   1   5  -3    0.73    0.16
  -1  -5   3    0.32    0.13
  -1  -5   3    0.68    0.14
  -1  -5   3    0.40    0.09
   0   5  -3   26.58    1.07
   0   5  -3   25.12    0.96
   0   5  -3   24.12    1.00
   0  -5   3   25.17    1.06
   0  -5   3   25.01    0.97
   0  -5   3   25.19    0.99
  -1   5  -3    3.76    0.23
  -1   5  -3    3.72    0.29
  -1   5  -3    3.65    0.22
   1  -5   3    3.46    0.24
   1  -5   3    3.32    0.23
   1  -5   3    3.79    0.30
  -2   5  -3   92.98    3.36
  -2   5  -3   93.82    3.42
  -2   5  -3   84.75    3.37
   2  -5   3   97.02    3.46
   2  -5   3   93.93    3.39
   2  -5   3   94.60    3.41
  -3   5  -3    8.75    0.49
  -3   5  -3    9.68    0.53
  -3   5  -3    9.06    0.47
   3  -5   3    9.84    0.55
   3  -5   3    7.96    0.52
  -4   5  -3    0.18    0.13
  -4   5  -3    0.32    0.15
  -4   5  -3    0.32    0.24
   4  -5   3   -0.07    0.17
  -5   5  -3    0.50    0.21
  -5   5  -3    0.44    0.19
   5  -5   3    0.46    0.23
  -6   5  -3   68.80    2.73
  -6   5  -3   67.98    2.66
   6  -5   3   62.88    2.67
  -7   5  -3    5.51    0.64
  -7   5  -3    5.04    0.64
  -8   5  -3    0.32    0.42
   7   4  -3   -0.23    0.42
  -7  -4   3   -0.92    0.52
  -7  -4   3    0.17    0.41
  -7  -4   3    0.70    0.39
  -6  -4   3    9.13    0.67
  -6  -4   3    9.98    0.90
   5   4  -3   19.73    1.17
   5   4  -3   20.52    1.07
  -5  -4   3   19.46    1.00
  -5  -4   3   20.65    1.14
   4   4  -3    4.53    0.42
   4   4  -3    3.77    0.47
  -4  -4   3    4.56    0.48
  -4  -4   3    4.42    0.39
   3   4  -3    6.04    0.40
   3   4  -3    6.50    0.48
   3   4  -3    5.89    0.44
  -3  -4   3    5.56    0.40
  -3  -4   3    6.32    0.48
   2   4  -3  104.49    4.27
   2   4  -3  120.31    4.28
  -2  -4   3  119.15    4.26
  -2  -4   3  119.24    4.27
  -2  -4   3  118.71    4.28
  -2  -4   3  119.61    4.20
   1   4  -3    0.56    0.10
   1   4  -3    0.76    0.15
   1   4  -3    0.52    0.13
  -1  -4   3    0.43    0.08
  -1  -4   3    0.50    0.11
  -1  -4   3    0.65    0.13
   0   4  -3   87.48    3.27
   0   4  -3   95.54    3.34
   0   4  -3   89.14    3.25
   0  -4   3   90.30    3.25
   0  -4   3   93.43    3.34
   0  -4   3   91.75    3.27
  -1   4  -3    0.08    0.06
  -1   4  -3    0.06    0.10
  -1   4  -3    0.11    0.07
   1  -4   3    0.12    0.08
   1  -4   3    0.15    0.09
   1  -4   3    0.21    0.08
  -2   4  -3  430.82   15.38
  -2   4  -3  441.76   15.45
   2  -4   3  427.12   15.46
   2  -4   3  438.99   15.40
   2  -4   3  455.37   15.43
  -3   4  -3    0.05    0.09
  -3   4  -3    0.02    0.12
  -3   4  -3    0.04    0.16
   3  -4   3    0.11    0.14
   3  -4   3    0.16    0.16
  -4   4  -3   62.02    2.49
  -4   4  -3   67.31    2.53
  -4   4  -3   62.68    2.45
   4  -4   3   61.82    2.51
   4  -4   3   67.85    2.54
  -5   4  -3    0.40    0.21
  -5   4  -3    0.16    0.21
   5  -4   3    0.52    0.24
  -6   4  -3    0.93    0.41
  -6   4  -3    0.22    0.27
   6  -4   3    1.06    0.32
  -7   4  -3   11.10    0.86
  -7   4  -3   12.87    0.84
   7  -4   3   12.65    0.92
  -8   4  -3    5.53    0.77
   7   3  -3    1.52    0.44
  -7  -3   3    1.01    0.43
  -7  -3   3    0.16    0.48
   6   3  -3    3.67    0.54
  -6  -3   3    2.62    0.52
  -6  -3   3    3.14    0.44
  -6  -3   3    3.15    0.52
   5   3  -3    2.29    0.36
   5   3  -3    2.40    0.35
  -5  -3   3    2.22    0.32
  -5  -3   3    2.29    0.33
  -5  -3   3    2.17    0.35
   4   3  -3    5.47    0.44
   4   3  -3    5.35    0.46
  -4  -3   3    5.55    0.55
  -4  -3   3    4.53    0.36
  -4  -3   3    4.27    0.46
   3   3  -3    1.79    0.26
   3   3  -3    1.94    0.29
   3   3  -3    2.04    0.26
  -3  -3   3    2.16    0.28
  -3  -3   3    2.23    0.25
  -3  -3   3    1.85    0.27
   2   3  -3    4.90    0.33
   2   3  -3    4.85    0.32
  -2  -3   3    5.24    0.32
  -2  -3   3    5.07    0.31
   1   3  -3   48.20    1.81
   1   3  -3   50.23    1.85
   1   3  -3   48.80    1.86
  -1  -3   3   51.37    1.80
  -1  -3   3   50.43    1.84
  -1  -3   3   46.07    1.84
   0   3  -3  322.49   10.78
   0   3  -3  287.81   10.73
   0   3  -3  294.05   10.71
   0  -3   3  315.41   10.79
   0  -3   3  313.25   10.72
   0  -3   3  304.07   10.72
  -1   3  -3   91.87    3.45
  -1   3  -3   90.74    3.37
  -1   3  -3   96.79    3.40
   1  -3   3   96.04    3.47
   1  -3   3   95.92    3.38
   1  -3   3   99.58    3.41
  -2   3  -3  119.06    4.35
  -2   3  -3  120.45    4.38
  -2   3  -3  126.32    4.44
   2  -3   3  122.43    4.37
   2  -3   3  117.35    4.45
   2  -3   3  127.34    4.41
  -3   3  -3   35.17    1.52
  -3   3  -3   39.70    1.59
  -3   3  -3   39.50    1.51
   3  -3   3   39.87    1.59
   3  -3   3   39.76    1.54
  -4   3  -3    8.22    0.58
  -4   3  -3    8.48    0.61
  -4   3  -3    8.28    0.50
  -4   3  -3    7.84    0.48
   4  -3   3    7.78    0.52
   4  -3   3    8.37    0.55
  -5   3  -3   48.43    2.00
  -5   3  -3   48.35    1.98
   5  -3   3   48.68    2.02
  -6   3  -3   38.95    1.68
  -6   3  -3   36.78    1.65
   6  -3   3   35.29    1.65
  -7   3  -3    3.71    0.52
  -7   3  -3    6.23    0.64
   7  -3   3    5.46    0.70
  -8   3  -3    0.52    0.47
  -8  -2   3   -0.15    0.63
  -8  -2   3    0.34    0.51
   7   2  -3    1.08    0.43
  -7  -2   3    2.07    0.42
  -7  -2   3    0.77    0.51
   6   2  -3    0.31    0.32
  -6  -2   3   -0.16    0.28
  -6  -2   3    0.70    0.38
  -6  -2   3    0.56    0.23
   5   2  -3   10.17    0.70
  -5  -2   3    9.73    0.58
  -5  -2   3   10.30    0.68
  -5  -2   3   10.78    0.76
   4   2  -3   35.09    1.59
   4   2  -3   35.45    1.54
  -4  -2   3   36.09    1.52
  -4  -2   3   36.69    1.49
  -4  -2   3   35.78    1.60
   3   2  -3    7.69    0.52
   3   2  -3    7.26    0.45
  -3  -2   3    7.74    0.53
  -3  -2   3    8.68    0.43
  -3  -2   3    8.05    0.46
   2   2  -3    0.97    0.15
   2   2  -3    1.03    0.15
   2   2  -3    1.03    0.19
  -2  -2   3    1.00    0.13
  -2  -2   3    0.87    0.17
  -2  -2   3    0.87    0.17
  -2  -2   3    1.09    0.16
   1   2  -3    6.69    0.33
   1   2  -3    6.72    0.33
   1   2  -3    6.51    0.35
  -1  -2   3    6.53    0.33
  -1  -2   3    6.86    0.34
  -1  -2   3    7.12    0.32
   0   2  -3  323.94   11.81
   0   2  -3  343.63   11.74
   0   2  -3  323.39   11.77
   0  -2   3  340.42   11.72
   0  -2   3  333.16   11.78
   0  -2   3  342.05   11.75
  -1   2  -3   48.38    1.73
  -1   2  -3   44.96    1.66
  -1   2  -3   43.55    1.62
   1  -2   3   44.17    1.73
   1  -2   3   46.94    1.67
  -2   2  -3    2.67    0.17
  -2   2  -3    2.29    0.25
  -2   2  -3    2.35    0.19
   2  -2   3    2.41    0.21
   2  -2   3    2.11    0.23
   2  -2   3    2.56    0.20
  -3   2  -3  114.61    4.06
  -3   2  -3  102.36    4.07
  -3   2  -3  115.52    4.08
  -3   2  -3  119.26    4.16
  -3   2  -3  104.23    4.10
   3  -2   3  113.09    4.07
   3  -2   3  116.09    4.16
  -4   2  -3    2.81    0.29
  -4   2  -3    3.28    0.32
  -4   2  -3    4.08    0.39
   4  -2   3    3.01    0.37
   4  -2   3    2.72    0.38
  -5   2  -3    7.94    0.55
  -5   2  -3    6.84    0.53
   5  -2   3    7.46    0.57
  -6   2  -3    1.93    0.37
  -6   2  -3    1.71    0.33
   6  -2   3    1.82    0.37
  -7   2  -3    8.87    0.76
  -7   2  -3    9.27    0.81
   7  -2   3   10.06    0.81
  -8   2  -3    7.80    0.83
  -8  -1   3   12.36    1.21
  -8  -1   3   11.10    1.03
   7   1  -3    0.03    0.42
  -7  -1   3    0.04    0.37
  -7  -1   3   -0.29    0.45
   6   1  -3    0.09    0.30
  -6  -1   3    0.05    0.37
  -6  -1   3    0.04    0.29
  -6  -1   3    0.33    0.20
   5   1  -3    1.21    0.29
  -5  -1   3    0.86    0.26
  -5  -1   3    0.99    0.26
  -5  -1   3    1.11    0.32
  -5  -1   3    0.87    0.22
   4   1  -3   24.94    1.15
  -4  -1   3   25.46    1.03
  -4  -1   3   22.67    1.16
  -4  -1   3   26.38    1.08
   3   1  -3   22.84    1.04
   3   1  -3   22.31    1.07
  -3  -1   3   23.43    1.10
  -3  -1   3   21.61    1.07
  -3  -1   3   25.48    0.98
  -3  -1   3   27.36    1.14
  -3  -1   3   24.36    0.95
   2   1  -3   56.68    2.04
   2   1  -3   55.13    2.14
   2   1  -3   56.71    2.11
  -2  -1   3   56.75    2.03
  -2  -1   3   56.37    2.15
  -2  -1   3   57.86    2.09
  -2  -1   3   53.48    2.12
  -2  -1   3   54.66    2.03
   1   1  -3   97.40    3.58
   1   1  -3   99.04    3.62
   1   1  -3  101.54    3.56
  -1  -1   3   99.23    3.62
  -1  -1   3  104.19    3.58
  -1  -1   3  104.11    3.62
  -1  -1   3   97.88    3.57
   0   1  -3  408.32   14.45
   0   1  -3  444.72   14.44
   0   1  -3  386.03   14.44
   0  -1   3  400.07   14.42
   0  -1   3  405.60   14.41
   0  -1   3  422.46   14.44
  -1   1  -3   40.74    1.49
  -1   1  -3   41.42    1.54
  -1   1  -3   44.86    1.63
   1  -1   3   41.20    1.55
   1  -1   3   46.54    1.52
   1  -1   3   39.34    1.61
  -2   1  -3    4.69    0.28
  -2   1  -3    4.95    0.35
  -2   1  -3    4.61    0.25
  -2   1  -3    4.87    0.26
   2  -1   3    4.44    0.25
   2  -1   3    5.11    0.30
   2  -1   3    5.17    0.34
  -3   1  -3   16.90    0.78
  -3   1  -3   17.08    0.87
  -3   1  -3   18.83    0.78
  -3   1  -3   19.59    0.79
  -3   1  -3   18.02    0.83
   3  -1   3   16.11    0.93
   3  -1   3   18.78    0.83
  -4   1  -3    0.48    0.19
  -4   1  -3    0.50    0.21
  -4   1  -3    0.11    0.14
   4  -1   3    0.54    0.19
  -5   1  -3    7.62    0.55
  -5   1  -3    7.33    0.54
   5  -1   3    8.19    0.59
  -6   1  -3   16.94    0.99
  -6   1  -3   18.08    0.98
   6  -1   3   18.13    1.02
  -7   1  -3    9.09    0.73
  -7   1  -3    6.94    0.78
   7  -1   3    6.51    0.81
  -8   1  -3    0.76    0.42
  -8   0   3   -1.07    0.48
  -8   0   3    0.26    0.60
   7   0  -3    0.28    0.40
  -7   0   3    0.03    0.38
  -7   0   3    0.47    0.44
   6   0  -3   -0.05    0.29
  -6   0   3    0.69    0.33
  -6   0   3    0.18    0.18
  -6   0   3   -0.14    0.28
   5   0  -3    9.28    0.68
  -5   0   3    9.30    0.69
  -5   0   3   10.04    0.65
  -5   0   3   10.82    0.54
  -5   0   3   10.90    0.60
   4   0  -3    2.71    0.31
  -4   0   3    3.12    0.32
  -4   0   3    3.00    0.35
  -4   0   3    3.06    0.29
  -4   0   3    3.07    0.24
   3   0  -3   40.32    1.66
   3   0  -3   38.80    1.62
  -3   0   3   40.60    1.62
  -3   0   3   40.01    1.67
  -3   0   3   39.91    1.48
  -3   0   3   39.33    1.66
  -3   0   3   42.48    1.50
   2   0  -3   37.00    1.45
   2   0  -3   38.20    1.48
   2   0  -3   37.73    1.34
  -2   0   3   36.63    1.34
  -2   0   3   36.77    1.33
  -2   0   3   38.19    1.44
  -2   0   3   36.67    1.48
  -2   0   3   34.58    1.46
   1   0  -3  240.15    8.59
   1   0  -3  255.54    8.64
   1   0  -3  231.32    8.55
  -1   0   3  246.51    8.63
  -1   0   3  248.73    8.59
  -1   0   3  251.43    8.63
  -1   0   3  237.89    8.56
   0   0  -3    1.53    0.09
   0   0  -3    1.74    0.15
   0   0  -3    1.88    0.12
   0   0   3    1.80    0.15
   0   0   3    1.80    0.11
   0   0   3    1.45    0.09
  -1   0  -3   79.54    2.86
  -1   0  -3   77.41    2.83
   1   0   3   82.60    2.97
   1   0   3   83.59    2.87
  -2   0  -3    3.14    0.23
  -2   0  -3    2.49    0.18
  -2   0  -3    2.31    0.27
  -2   0  -3    2.85    0.18
  -2   0  -3    2.41    0.19
   2   0   3    2.66    0.27
   2   0   3    2.41    0.19
   2   0   3    2.43    0.21
  -3   0  -3    0.48    0.13
  -3   0  -3    0.93    0.21
  -3   0  -3    0.70    0.18
  -3   0  -3    0.70    0.15
   3   0   3    0.60    0.17
  -4   0  -3    2.46    0.31
  -4   0  -3    2.75    0.29
  -4   0  -3    2.82    0.34
   4   0   3    2.95    0.34
  -5   0  -3    4.33    0.43
  -5   0  -3    5.01    0.47
   5   0   3    4.92    0.50
  -6   0  -3   26.69    1.33
  -6   0  -3   27.28    1.31
   6   0   3   27.44    1.35
  -7   0  -3    4.91    0.71
  -7   0  -3    4.38    0.61
  -7   0  -3    3.96    0.48
   7   0   3    3.89    0.57
  -8   1   3    3.93    0.63
  -8   1   3    4.04    0.70
  -7   1   3   -0.05    0.41
  -7   1   3   -0.32    0.36
   6  -1  -3    2.82    0.42
  -6   1   3    2.13    0.38
  -6   1   3    2.75    0.32
  -6   1   3    2.46    0.41
   5  -1  -3   33.64    1.54
  -5   1   3   33.40    1.29
  -5   1   3   37.56    1.35
  -5   1   3   30.44    1.52
  -5   1   3   32.02    1.52
   4  -1  -3    3.12    0.34
  -4   1   3    3.49    0.22
  -4   1   3    4.26    0.26
  -4   1   3    3.06    0.38
  -4   1   3    3.11    0.33
   3  -1  -3   30.35    1.34
   3  -1  -3   32.83    1.41
  -3   1   3   30.78    1.34
  -3   1   3   36.15    1.18
  -3   1   3   32.42    1.16
  -3   1   3   32.53    1.41
  -3   1   3   33.10    1.37
  -3   1   3   30.83    1.37
   2  -1  -3  165.26    5.82
   2  -1  -3  157.12    5.78
  -2   1   3  160.69    5.82
  -2   1   3  162.41    5.77
   1  -1  -3   19.92    0.79
   1  -1  -3   19.86    0.83
   1  -1  -3   20.78    0.76
  -1   1   3   21.07    0.79
  -1   1   3   19.14    0.76
  -1   1   3   20.31    0.83
   0  -1  -3   60.89    2.19
   0  -1  -3   62.18    2.23
   0  -1  -3   64.76    2.28
   0   1   3   61.22    2.18
   0   1   3   63.28    2.28
   0   1   3   60.55    2.22
  -1  -1  -3  374.17   13.40
  -1  -1  -3  403.08   13.48
  -1  -1  -3  367.98   13.40
   1   1   3  369.16   13.42
   1   1   3  382.63   13.38
   1   1   3  397.46   13.49
  -2  -1  -3    1.93    0.25
  -2  -1  -3    2.19    0.20
  -2  -1  -3    1.65    0.16
  -2  -1  -3    1.68    0.15
   2   1   3    1.61    0.16
   2   1   3    1.56    0.22
   2   1   3    1.87    0.19
  -3  -1  -3   12.19    0.59
  -3  -1  -3   11.80    0.61
  -3  -1  -3   11.30    0.59
  -3  -1  -3   12.46    0.56
   3   1   3   12.25    0.60
   3   1   3   11.16    0.66
  -4  -1  -3    1.17    0.19
  -4  -1  -3    1.39    0.23
  -4  -1  -3    1.26    0.23
   4   1   3    1.22    0.25
  -5  -1  -3    6.78    0.49
  -5  -1  -3    5.70    0.52
   5   1   3    6.58    0.56
  -6  -1  -3    6.06    0.60
  -6  -1  -3    7.00    0.67
  -6  -1  -3    7.90    0.73
   6   1   3    6.67    0.67
  -7  -1  -3    1.63    0.39
  -7  -1  -3    1.43    0.46
  -7  -1  -3    1.60    0.46
   7   1   3    2.10    0.52
  -8   2   3    8.24    1.01
  -8   2   3    8.04    0.83
  -7   2   3    3.40    0.54
  -7   2   3    3.38    0.52
   6  -2  -3    8.07    0.72
  -6   2   3    8.34    0.73
  -6   2   3    7.90    0.67
  -6   2   3    8.58    0.57
   5  -2  -3   19.55    1.06
  -5   2   3   20.44    1.05
  -5   2   3   20.16    0.79
  -5   2   3   18.90    1.07
  -5   2   3   21.78    0.81
   4  -2  -3   14.98    0.79
  -4   2   3   14.37    0.84
  -4   2   3   15.93    0.80
   3  -2  -3   11.76    0.63
  -3   2   3   13.24    0.72
  -3   2   3   11.50    0.65
  -3   2   3   11.77    0.62
   2  -2  -3   35.09    1.37
   2  -2  -3   34.02    1.41
  -2   2   3   34.83    1.37
  -2   2   3   33.98    1.40
  -2   2   3   35.29    1.37
   1  -2  -3  429.95   15.07
   1  -2  -3  422.40   15.07
   1  -2  -3  425.35   15.12
   1  -2  -3  424.13   15.08
  -1   2   3  433.01   15.06
  -1   2   3  423.90   15.12
  -1   2   3  440.88   15.08
  -1   2   3  446.93   15.08
   0  -2  -3  669.93   23.91
   0  -2  -3  693.23   24.16
   0  -2  -3  728.60   23.96
   0   2   3  646.62   23.88
   0   2   3  700.06   24.23
   0   2   3  669.41   24.09
  -1  -2  -3   38.36    1.52
  -1  -2  -3   37.39    1.35
  -1  -2  -3   39.23    1.36
  -1  -2  -3   37.69    1.38
   1   2   3   37.80    1.39
   1   2   3   36.40    1.51
  -2  -2  -3  139.15    5.00
  -2  -2  -3  134.46    4.81
  -2  -2  -3  137.91    4.83
  -2  -2  -3  134.37    4.82
   2   2   3  133.17    4.85
  -3  -2  -3    2.39    0.31
  -3  -2  -3    2.55    0.25
  -3  -2  -3    2.50    0.25
   3   2   3    2.83    0.31
   3   2   3    2.33    0.29
  -4  -2  -3   13.68    0.75
  -4  -2  -3   14.25    0.70
   4   2   3   13.55    0.80
   4   2   3   14.50    0.75
  -5  -2  -3    0.97    0.25
  -5  -2  -3    1.40    0.30
  -5  -2  -3    0.98    0.29
   5   2   3    0.60    0.31
  -6  -2  -3    0.55    0.29
  -6  -2  -3    0.77    0.36
  -6  -2  -3    1.00    0.37
   6   2   3    0.76    0.35
  -7  -2  -3   -0.20    0.35
  -7  -2  -3    0.41    0.47
  -7  -2  -3   -0.44    0.48
   7   2   3    0.11    0.47
  -8   3   3    3.95    0.69
  -7   3   3    3.57    0.51
  -7   3   3    3.42    0.53
  -6   3   3    0.35    0.33
   5  -3  -3    0.17    0.22
  -5   3   3    0.18    0.26
  -5   3   3    0.25    0.21
   4  -3  -3  175.52    6.36
  -4   3   3  170.99    6.39
  -4   3   3  174.42    6.35
   3  -3  -3  103.72    3.92
  -3   3   3  105.38    3.92
  -3   3   3  108.86    3.97
   2  -3  -3   76.52    2.80
   2  -3  -3   71.03    2.62
   2  -3  -3   75.54    2.75
  -2   3   3   74.05    2.74
  -2   3   3   73.53    2.74
   1  -3  -3   70.20    2.56
   1  -3  -3   68.99    2.61
   1  -3  -3   70.77    2.55
   1  -3  -3   71.69    2.57
  -1   3   3   71.88    2.55
  -1   3   3   70.67    2.56
  -1   3   3   70.08    2.54
  -1   3   3   69.18    2.59
   0  -3  -3    2.32    0.22
   0  -3  -3    2.33    0.23
   0  -3  -3    2.20    0.19
   0   3   3    2.34    0.17
   0   3   3    2.51    0.23
  -1  -3  -3  188.99    6.56
  -1  -3  -3  180.80    6.41
  -1  -3  -3  177.14    6.34
  -1  -3  -3  174.75    6.34
  -1  -3  -3  189.31    6.57
   1   3   3  177.15    6.41
   1   3   3  183.30    6.55
  -2  -3  -3  160.20    5.40
  -2  -3  -3  150.98    5.39
  -2  -3  -3  152.01    5.41
   2   3   3  153.96    5.45
   2   3   3  144.30    5.57
  -3  -3  -3    0.68    0.15
  -3  -3  -3    0.30    0.16
  -3  -3  -3    0.73    0.20
  -3  -3  -3    0.45    0.14
   3   3   3    0.42    0.13
   3   3   3    0.50    0.18
  -4  -3  -3    0.93    0.21
  -4  -3  -3    0.96    0.23
  -4  -3  -3    1.16    0.21
   4   3   3    0.84    0.23
   4   3   3    0.82    0.26
  -5  -3  -3   58.90    2.52
  -5  -3  -3   56.64    2.41
  -5  -3  -3   60.95    2.35
   5   3   3   58.46    2.51
   5   3   3   60.90    2.44
  -6  -3  -3    6.87    0.58
  -6  -3  -3    6.96    0.73
   6   3   3    5.76    0.99
  -7  -3  -3    0.99    0.41
  -7  -3  -3    1.67    0.49
  -7  -3  -3    0.80    0.52
   7   3   3    1.06    0.49
  -8   4   3   -0.82    0.50
  -8   4   3    0.29    0.53
  -7   4   3    2.61    0.46
  -7   4   3    2.48    0.45
  -6   4   3    2.68    0.42
  -6   4   3    2.79    0.50
  -5   4   3    0.05    0.22
  -5   4   3    0.04    0.25
  -4   4   3    9.80    0.59
  -4   4   3   10.85    0.65
   3  -4  -3   29.58    1.04
   3  -4  -3   28.12    1.03
  -3   4   3   27.47    1.20
  -3   4   3   27.40    1.24
   2  -4  -3    8.90    0.41
   2  -4  -3    8.89    0.39
   2  -4  -3    8.21    0.51
  -2   4   3    8.89    0.47
  -2   4   3    8.87    0.46
  -2   4   3    8.15    0.48
   1  -4  -3    6.25    0.39
   1  -4  -3    6.17    0.36
   1  -4  -3    6.46    0.36
  -1   4   3    6.41    0.36
  -1   4   3    6.69    0.32
  -1   4   3    6.51    0.33
   0  -4  -3   20.73    0.90
   0  -4  -3   21.63    0.84
   0  -4  -3   19.77    0.88
   0   4   3   19.38    0.80
   0   4   3   20.49    0.72
   0   4   3   16.89    0.70
   0   4   3   19.75    0.88
  -1  -4  -3  268.28    9.14
  -1  -4  -3  263.35    8.99
  -1  -4  -3  249.82    9.13
   1   4   3  245.08    9.12
   1   4   3  247.41    8.98
  -2  -4  -3   71.59    2.59
  -2  -4  -3   74.76    2.54
  -2  -4  -3   64.14    2.75
  -2  -4  -3   73.03    2.55
   2   4   3   67.65    2.76
   2   4   3   72.69    2.55
  -3  -4  -3    6.20    0.53
  -3  -4  -3    7.13    0.40
  -3  -4  -3    7.12    0.40
   3   4   3    6.77    0.45
   3   4   3    6.89    0.54
  -4  -4  -3   82.81    3.14
  -4  -4  -3   81.16    3.34
   4   4   3   84.52    3.36
   4   4   3   87.61    3.27
  -5  -4  -3    9.72    0.78
  -5  -4  -3   10.35    0.75
  -5  -4  -3   10.53    0.63
   5   4   3    9.78    0.73
   5   4   3   10.14    0.79
  -6  -4  -3    8.25    0.80
  -6  -4  -3    8.04    0.65
  -6  -4  -3    7.23    0.80
   6   4   3    8.02    0.82
   6   4   3    8.26    0.85
  -7  -4  -3   -0.35    0.39
  -7  -4  -3   -0.58    0.50
  -8   5   3   -1.18    0.50
  -8   5   3   -0.48    0.51
  -7   5   3    0.41    0.39
  -7   5   3   -0.63    0.35
  -6   5   3   23.56    1.26
  -5   5   3   17.36    1.00
  -5   5   3   18.57    0.98
  -4   5   3   33.31    1.41
  -4   5   3   30.96    1.44
   3  -5  -3    4.20    0.25
   3  -5  -3    4.28    0.27
  -3   5   3    3.89    0.34
  -3   5   3    4.35    0.26
  -3   5   3    3.64    0.33
   2  -5  -3    1.28    0.18
   2  -5  -3    1.88    0.22
  -2   5   3    1.91    0.22
  -2   5   3    1.35    0.21
  -2   5   3    1.54    0.22
  -2   5   3    1.62    0.22
   1  -5  -3   24.40    1.07
   1  -5  -3   24.74    1.06
   1  -5  -3   25.27    0.99
   1  -5  -3   25.51    1.05
  -1   5   3   25.64    0.96
  -1   5   3   26.16    0.99
  -1   5   3   23.00    1.03
   0  -5  -3    0.12    0.17
   0  -5  -3    0.14    0.13
   0  -5  -3    0.14    0.12
   0  -5  -3    0.28    0.06
   0   5   3    0.12    0.08
   0   5   3    0.12    0.04
   0   5   3    0.18    0.12
   0   5   3    0.09    0.06
  -1  -5  -3    4.39    0.31
  -1  -5  -3    4.11    0.39
   1   5   3    4.41    0.28
   1   5   3    4.18    0.36
  -2  -5  -3   29.43    1.03
  -2  -5  -3   26.34    1.28
  -2  -5  -3   27.56    1.05
   2   5   3   28.15    1.05
   2   5   3   27.81    1.16
   2   5   3   26.29    1.28
  -3  -5  -3  121.09    4.31
  -3  -5  -3  123.76    4.28
  -3  -5  -3  115.14    4.55
   3   5   3  114.38    4.41
   3   5   3  122.42    4.31
   3   5   3  119.26    4.57
  -4  -5  -3    1.63    0.35
  -4  -5  -3    1.90    0.25
   4   5   3    1.82    0.33
   4   5   3    2.50    0.42
  -5  -5  -3    0.77    0.32
  -5  -5  -3    0.45    0.23
   5   5   3    0.26    0.33
  -6  -5  -3    0.71    0.32
  -6  -5  -3    1.05    0.47
   6   5   3    0.24    0.42
   6   5   3    1.61    0.47
  -8   6   3   -0.46    0.50
  -7   6   3    7.99    0.81
  -7   6   3    7.53    0.79
  -6   6   3    5.01    0.53
  -6   6   3    4.21    0.56
  -5   6   3    0.57    0.27
  -5   6   3    0.38    0.27
   4  -6  -3   59.23    2.09
   4  -6  -3   57.87    2.09
  -4   6   3   56.40    2.29
  -4   6   3   57.01    2.09
  -4   6   3   55.78    2.34
   3  -6  -3    0.97    0.17
   3  -6  -3    0.85    0.14
  -3   6   3    1.28    0.22
  -3   6   3    0.78    0.16
  -3   6   3    0.97    0.17
   2  -6  -3   14.19    0.65
   2  -6  -3   14.47    0.69
   2  -6  -3   14.04    0.69
  -2   6   3   14.46    0.69
  -2   6   3   13.30    0.69
  -2   6   3   14.90    0.70
  -2   6   3   13.89    0.71
   1  -6  -3   18.92    0.91
   1  -6  -3   21.06    0.84
   1  -6  -3   19.55    0.93
  -1   6   3   19.62    0.89
  -1   6   3   20.79    0.84
  -1   6   3   21.44    0.95
  -1   6   3   21.09    0.80
   0  -6  -3   11.25    0.62
   0  -6  -3   11.62    0.46
   0   6   3   11.41    0.46
   0   6   3   11.38    0.43
   0   6   3   10.23    0.53
  -1  -6  -3   36.14    1.55
   1   6   3   36.31    1.54
   1   6   3   33.75    1.40
  -2  -6  -3   39.73    1.37
  -2  -6  -3   35.98    1.66
  -2  -6  -3   38.86    1.40
   2   6   3   38.96    1.40
   2   6   3   36.78    1.54
   2   6   3   35.30    1.65
  -3  -6  -3    6.55    0.36
  -3  -6  -3    6.75    0.58
  -3  -6  -3    6.52    0.40
   3   6   3    6.54    0.40
   3   6   3    6.40    0.57
   3   6   3    6.27    0.50
  -4  -6  -3    0.56    0.28
  -4  -6  -3    0.34    0.17
   4   6   3    0.34    0.28
   4   6   3    0.53    0.29
  -5  -6  -3   12.19    0.70
  -5  -6  -3   12.50    0.88
  -5  -6  -3   10.71    0.87
   5   6   3   11.44    0.89
   5   6   3   12.73    0.95
  -6  -6  -3   -0.03    0.49
  -6  -6  -3   -0.33    0.44
   6   6   3    0.16    0.53
  -7   7   3    5.75    0.82
  -7   7   3    7.71    0.78
  -6   7   3   28.63    1.47
  -6   7   3   28.41    1.43
  -5   7   3   26.83    1.34
  -5   7   3   27.03    1.29
   4  -7  -3    2.37    0.28
   4  -7  -3    2.95    0.32
  -4   7   3    3.01    0.36
  -4   7   3    3.46    0.31
  -4   7   3    2.95    0.37
   3  -7  -3    6.27    0.41
   3  -7  -3    6.86    0.46
  -3   7   3    6.58    0.48
  -3   7   3    7.57    0.46
  -3   7   3    7.26    0.45
   2  -7  -3    6.30    0.48
   2  -7  -3    6.24    0.44
   2  -7  -3    5.57    0.38
  -2   7   3    6.33    0.44
  -2   7   3    5.52    0.46
  -2   7   3    5.53    0.40
  -2   7   3    5.56    0.34
   1  -7  -3    8.41    0.43
   1  -7  -3    8.33    0.50
  -1   7   3    7.94    0.46
  -1   7   3    8.22    0.38
  -1   7   3    7.53    0.43
   0  -7  -3   26.79    1.00
   0  -7  -3   26.30    1.22
   0   7   3   26.44    0.96
   0   7   3   27.33    1.00
   0   7   3   25.23    1.10
  -1  -7  -3   52.55    2.18
   1   7   3   53.17    2.05
  -2  -7  -3   63.87    2.27
  -2  -7  -3   65.58    2.24
  -2  -7  -3   60.76    2.60
   2   7   3   63.55    2.27
   2   7   3   60.40    2.44
  -3  -7  -3    7.22    0.42
  -3  -7  -3    6.19    0.59
  -3  -7  -3    7.23    0.36
   3   7   3    6.30    0.54
   3   7   3    6.94    0.42
  -4  -7  -3    0.40    0.21
  -4  -7  -3    0.26    0.34
   4   7   3    0.22    0.32
  -5  -7  -3    1.81    0.49
   5   7   3    1.85    0.46
  -6  -7  -3    3.37    0.66
  -6  -7  -3    4.83    0.70
   6   7   3    4.79    0.71
  -7   8   3    8.20    0.84
  -7   8   3    9.45    0.91
  -6   8   3   -0.15    0.36
  -6   8   3   -0.17    0.29
  -5   8   3    2.58    0.45
  -5   8   3    2.50    0.35
   4  -8  -3   53.24    2.09
  -4   8   3   54.82    2.22
  -4   8   3   56.48    2.30
  -4   8   3   55.32    2.21
   3  -8  -3   10.50    0.58
   3  -8  -3   10.36    0.66
  -3   8   3   10.06    0.66
  -3   8   3   12.15    0.60
  -3   8   3   11.17    0.66
   2  -8  -3   12.59    0.66
   2  -8  -3   13.87    0.69
  -2   8   3   11.97    0.67
  -2   8   3   12.32    0.60
  -2   8   3   13.43    0.70
   1  -8  -3   10.25    0.52
   1  -8  -3    9.97    0.60
  -1   8   3    9.47    0.56
  -1   8   3   10.39    0.53
  -1   8   3   10.71    0.46
   0  -8  -3   22.57    1.11
   0  -8  -3   23.73    0.89
   0   8   3   21.61    1.00
   0   8   3   23.65    0.90
   0   8   3   23.32    0.86
  -1  -8  -3    2.66    0.40
   1   8   3    3.63    0.33
  -2  -8  -3    0.12    0.22
  -2  -8  -3    0.39    0.11
  -2  -8  -3    0.36    0.09
   2   8   3    0.04    0.19
   2   8   3    0.15    0.12
  -3  -8  -3    1.74    0.38
  -3  -8  -3    1.80    0.22
   3   8   3    1.83    0.31
   3   8   3    1.31    0.21
  -4  -8  -3    5.39    0.69
   4   8   3    6.03    0.67
  -5  -8  -3    0.29    0.44
   5   8   3    1.11    0.51
  -7   9   3    1.54    0.46
  -7   9   3    2.67    0.51
  -6   9   3   12.20    0.89
  -6   9   3   12.65    0.92
  -5   9   3    0.09    0.27
  -5   9   3   -0.31    0.25
   4  -9  -3   19.98    1.01
  -4   9   3   23.41    1.14
  -4   9   3   22.43    1.05
   3  -9  -3   12.44    0.67
  -3   9   3   12.51    0.73
  -3   9   3   13.51    0.66
   2  -9  -3   15.95    0.84
  -2   9   3   16.57    0.72
  -2   9   3   16.96    0.85
   1  -9  -3    0.11    0.17
   1  -9  -3   -0.01    0.19
  -1   9   3    0.28    0.15
  -1   9   3   -0.09    0.10
  -1   9   3   -0.36    0.18
   0  -9  -3   93.63    3.32
   0  -9  -3   91.35    3.61
   0   9   3   91.35    3.48
   0   9   3   92.02    3.29
   0   9   3   94.80    3.32
  -1  -9  -3   11.72    0.78
   1   9   3   12.02    0.67
  -2  -9  -3   -0.17    0.24
   2   9   3   -0.11    0.18
  -3  -9  -3   28.54    1.54
   3   9   3   29.17    1.40
  -4  -9  -3   -0.90    0.41
   4   9   3    0.57    0.42
  -5  -9  -3    0.69    0.49
   5   9   3    0.79    0.55
  -7  10   3    2.97    0.55
  -7  10   3    3.13    0.54
  -6  10   3    1.96    0.44
  -6  10   3    1.69    0.42
  -5  10   3    7.88    0.68
  -5  10   3    7.54    0.72
   4 -10  -3   28.71    1.32
  -4  10   3   32.57    1.48
  -4  10   3   31.29    1.36
   3 -10  -3    5.52    0.46
  -3  10   3    6.17    0.53
  -3  10   3    6.43    0.43
   2 -10  -3   63.74    2.58
  -2  10   3   65.63    2.42
  -2  10   3   65.82    2.58
   1 -10  -3    7.56    0.49
   1 -10  -3    6.96    0.57
  -1  10   3    6.58    0.75
  -1  10   3    5.99    0.48
  -1  10   3    7.00    0.36
   0 -10  -3    3.82    0.48
   0  10   3    3.81    0.25
   0  10   3    3.64    0.34
  -1 -10  -3   43.74    1.97
   1  10   3   41.60    1.78
  -2 -10  -3    3.13    0.50
   2  10   3    2.49    0.35
  -3 -10  -3   -0.21    0.40
   3  10   3    0.62    0.35
  -4 -10  -3    8.49    0.92
   4  10   3    8.87    0.89
  -5 -10  -3   -0.02    0.54
   5  10   3    0.03    0.59
  -6  11   3    1.46    0.42
  -6  11   3    1.36    0.46
  -5  11   3   11.17    0.78
  -5  11   3   12.95    0.86
   4 -11  -3   -0.22    0.29
  -4  11   3   -0.10    0.23
  -4  11   3    0.00    0.26
   3 -11  -3    0.47    0.26
  -3  11   3    0.30    0.19
  -3  11   3    0.78    0.26
   2 -11  -3   54.51    2.26
  -2  11   3   55.58    2.07
   1 -11  -3    6.38    0.58
  -1  11   3    5.96    0.50
   0 -11  -3   13.29    0.89
   0  11   3   12.79    0.75
  -1 -11  -3    9.77    0.80
   1  11   3    8.12    0.96
  -2 -11  -3   30.59    1.63
   2  11   3   32.13    1.52
  -3 -11  -3    1.22    0.47
   3  11   3    0.20    0.38
  -4 -11  -3    7.33    0.98
   4  11   3    9.36    0.94
  -6  12   3    1.25    0.50
  -6  12   3    0.23    0.41
  -5  12   3    6.58    0.64
  -5  12   3    4.77    0.71
  -4  12   3    2.24    0.41
  -4  12   3    1.93    0.33
   3 -12  -3    0.13    0.28
  -3  12   3   -0.06    0.20
  -3  12   3    0.15    0.27
   2 -12  -3    3.56    0.51
  -2  12   3    3.78    0.31
  -2  12   3    3.19    0.47
   1 -12  -3    0.81    0.33
  -1  12   3    0.95    0.27
   0 -12  -3    4.13    0.63
   0  12   3    4.36    0.47
  -1 -12  -3    0.42    0.40
   1  12   3    0.36    0.30
  -2 -12  -3    9.89    0.88
   2  12   3   10.01    0.82
  -3 -12  -3    6.22    0.86
   3  12   3    5.51    0.76
  -5  13   3   -0.12    0.35
  -5  13   3    0.17    0.43
  -4  13   3    5.70    0.55
  -4  13   3    5.84    0.60
   3 -13  -3    5.32    0.69
  -3  13   3    6.07    0.64
   2 -13  -3    1.29    0.39
  -2  13   3    1.43    0.26
   1 -13  -3   10.10    0.84
  -1  13   3   10.50    0.69
   0 -13  -3    2.41    0.51
  -1 -13  -3    0.13    0.45
   1  13   3   -0.54    0.36
  -2 -13  -3    8.00    0.95
   2  13   3    6.81    0.78
  -4  14   3    0.68    0.36
   3 -14  -3    0.07    0.44
  -3  14   3   -0.51    0.35
   2 -14  -3    0.82    0.44
  -2  14   3    0.74    0.30
   1 -14  -3    0.77    0.46
  -1  14   3    0.54    0.33
   0 -14  -3    7.05    0.89
   0  14   3    6.70    0.63
  -1 -14  -3   13.09    1.14
   1  14   3   13.61    0.97
   2 -15  -3    2.12    0.53
  -2  15   3    0.94    0.42
   1 -15  -3    3.69    0.61
  -1  15   3    5.07    0.67
   0 -15  -3    3.34    0.63
   0  15   3    3.69    0.57
   1  16  -4    1.09    0.51
  -1 -16   4    0.37    0.55
   0  16  -4    3.06    0.56
   0 -16   4    2.87    0.61
  -1  16  -4    0.45    0.32
  -1  16  -4   -0.18    0.36
   1 -16   4    0.53    0.48
  -2  16  -4    9.35    0.64
  -2  16  -4   10.73    0.84
   2 -16   4    9.92    1.03
  -3  16  -4    1.77    0.42
  -3  16  -4    1.16    0.33
   3 -16   4    0.86    0.56
   2  15  -4    0.20    0.50
  -2 -15   4    0.62    0.49
   1  15  -4    1.55    0.43
  -1 -15   4    1.74    0.50
   0  15  -4    1.72    0.47
   0  15  -4    1.82    0.29
   0 -15   4    1.25    0.49
  -1  15  -4   17.22    0.90
  -1  15  -4   20.88    1.11
   1 -15   4   18.18    1.19
  -2  15  -4    0.92    0.29
  -2  15  -4    0.82    0.25
   2 -15   4    1.23    0.49
  -3  15  -4   22.16    1.16
  -3  15  -4   19.21    1.00
   3 -15   4   20.68    1.29
  -4  15  -4    2.34    0.42
  -4  15  -4    2.76    0.40
   4 -15   4    2.60    0.61
   3  14  -4    0.56    0.48
  -3 -14   4    0.14    0.44
   2  14  -4    6.25    0.69
  -2 -14   4    4.85    0.76
   1  14  -4   22.74    1.27
   1  14  -4   27.33    1.40
  -1 -14   4   25.74    1.42
   0  14  -4    3.25    0.51
   0  14  -4    3.03    0.39
   0 -14   4    4.16    0.65
  -1  14  -4    0.56    0.20
  -1  14  -4    0.94    0.33
   1 -14   4    0.85    0.40
  -2  14  -4    7.32    0.48
  -2  14  -4    6.35    0.60
   2 -14   4    6.27    0.75
  -3  14  -4    0.68    0.24
  -3  14  -4   -0.03    0.28
   3 -14   4    0.91    0.40
  -4  14  -4    5.98    0.59
  -4  14  -4    6.85    0.63
   4 -14   4    6.84    0.82
  -5  14  -4   -0.15    0.32
  -5  14  -4   -0.54    0.36
   4  13  -4    1.63    0.61
  -4 -13   4    2.12    0.64
   3  13  -4    3.17    0.62
   3  13  -4    2.74    0.51
  -3 -13   4    3.21    0.59
   2  13  -4   30.01    1.38
   2  13  -4   31.58    1.61
  -2 -13   4   31.52    1.64
   1  13  -4    0.19    0.29
   1  13  -4    0.46    0.22
  -1 -13   4    0.08    0.36
   0  13  -4    3.09    0.35
   0  13  -4    2.99    0.43
   0 -13   4    3.23    0.50
  -1  13  -4   12.03    0.74
  -1  13  -4   10.67    0.59
  -2  13  -4   12.85    0.66
  -2  13  -4   12.15    0.76
   2 -13   4   12.25    0.90
  -3  13  -4    9.68    0.65
   3 -13   4   11.00    0.80
  -4  13  -4   -0.03    0.27
  -4  13  -4    0.12    0.23
   4 -13   4   -0.72    0.39
  -5  13  -4    0.85    0.30
  -5  13  -4    1.45    0.36
   5 -13   4    0.70    0.49
  -6  13  -4    4.82    0.60
  -6  13  -4    6.86    0.70
   4  12  -4   12.25    0.95
   4  12  -4   13.30    1.08
  -4 -12   4   12.34    1.06
   3  12  -4    5.92    0.73
   3  12  -4    6.02    0.62
  -3 -12   4    5.73    0.75
   2  12  -4    4.71    0.48
   2  12  -4    5.53    0.59
  -2 -12   4    5.89    0.59
   1  12  -4    1.50    0.22
   1  12  -4    1.73    0.34
  -1 -12   4    1.45    0.37
   0  12  -4    0.06    0.20
   0  12  -4    0.08    0.14
   0 -12   4    0.26    0.25
  -1  12  -4    6.62    0.49
  -1  12  -4    5.83    0.40
   1 -12   4    6.85    0.61
  -2  12  -4   34.82    1.41
  -2  12  -4   34.11    1.49
   2 -12   4   33.25    1.61
  -3  12  -4   36.75    1.59
  -3  12  -4   37.47    1.54
   3 -12   4   36.85    1.72
  -4  12  -4    0.36    0.23
  -4  12  -4    0.87    0.27
   4 -12   4    0.29    0.35
  -5  12  -4    2.51    0.37
  -5  12  -4    2.26    0.36
   5 -12   4    2.74    0.53
  -6  12  -4    0.46    0.36
  -6  12  -4   -0.17    0.30
   5  11  -4   19.49    1.37
   5  11  -4   20.45    1.42
  -5 -11   4   16.50    1.28
   4  11  -4    2.81    0.57
   4  11  -4    2.64    0.45
  -4 -11   4    2.84    0.50
   3  11  -4   28.79    1.47
   3  11  -4   25.67    1.27
  -3 -11   4   27.89    1.46
   2  11  -4    7.30    0.52
   2  11  -4    6.73    0.85
  -2 -11   4    6.92    0.73
   1  11  -4   -0.13    0.19
   1  11  -4   -0.07    0.15
  -1 -11   4    0.16    0.21
   0  11  -4   27.98    1.28
   0  11  -4   28.03    1.15
   0 -11   4   27.45    1.35
  -1  11  -4    0.18    0.12
  -1  11  -4   -0.09    0.17
   1 -11   4   -0.22    0.22
  -2  11  -4   22.57    1.05
  -2  11  -4   22.82    0.98
   2 -11   4   21.98    1.15
  -3  11  -4    0.70    0.17
  -3  11  -4    0.80    0.19
   3 -11   4    0.71    0.30
  -4  11  -4    4.99    0.51
  -4  11  -4    5.16    0.46
   4 -11   4    4.83    0.57
  -5  11  -4    3.24    0.49
  -5  11  -4    2.60    0.36
   5 -11   4    3.03    0.47
  -6  11  -4    8.42    0.72
  -6  11  -4    9.48    0.76
   5  10  -4    0.12    0.47
   5  10  -4    0.00    0.40
  -5 -10   4    0.00    0.40
   4  10  -4    2.04    0.45
   4  10  -4    0.99    0.33
  -4 -10   4    0.67    0.33
   3  10  -4    2.31    0.32
  -3 -10   4    2.27    0.41
   2  10  -4    1.21    0.23
   2  10  -4    1.77    0.34
  -2 -10   4    1.33    0.28
   1  10  -4    6.18    0.50
   1  10  -4    5.42    0.38
  -1 -10   4    5.92    0.53
   0  10  -4   47.47    1.89
   0  10  -4   45.25    1.76
   0 -10   4   45.34    1.95
  -1  10  -4   69.95    2.63
  -1  10  -4   72.07    2.72
   1 -10   4   70.10    2.82
  -2  10  -4   18.02    0.81
  -2  10  -4   17.30    0.85
   2 -10   4   17.76    0.95
  -3  10  -4   13.15    0.68
  -3  10  -4   13.70    0.70
   3 -10   4   12.25    0.78
  -4  10  -4    2.24    0.33
  -4  10  -4    2.35    0.31
   4 -10   4    2.39    0.37
  -5  10  -4    0.56    0.26
  -5  10  -4    0.02    0.23
   5 -10   4    0.47    0.35
  -6  10  -4   12.45    0.83
  -6  10  -4   14.30    0.86
   6 -10   4   11.56    1.02
  -7  10  -4    7.95    0.80
  -7  10  -4    7.20    0.75
   6   9  -4   11.07    0.97
   6   9  -4    9.67    1.05
  -6  -9   4    8.80    1.00
  -6  -9   4   10.13    1.15
   5   9  -4    1.42    0.45
   5   9  -4    1.53    0.46
  -5  -9   4    1.36    0.40
   4   9  -4    0.14    0.34
   4   9  -4   -0.18    0.28
  -4  -9   4    0.91    0.33
   3   9  -4   15.85    0.94
   3   9  -4   15.32    0.81
  -3  -9   4   14.58    0.89
   2   9  -4    2.42    0.31
   2   9  -4    2.75    0.34
  -2  -9   4    2.82    0.37
   1   9  -4    1.68    0.22
   1   9  -4    2.21    0.32
  -1  -9   4    1.81    0.30
   0   9  -4    9.74    0.56
   0   9  -4    9.10    0.46
   0  -9   4    9.31    0.58
  -1   9  -4   -0.01    0.13
  -1   9  -4    0.10    0.10
   1  -9   4    0.12    0.18
  -2   9  -4    1.56    0.21
  -2   9  -4    1.42    0.21
   2  -9   4    1.46    0.26
  -3   9  -4    8.18    0.49
  -3   9  -4    8.14    0.49
   3  -9   4    7.55    0.58
  -4   9  -4    0.89    0.22
  -4   9  -4    1.13    0.23
   4  -9   4    1.38    0.29
  -5   9  -4    0.11    0.19
  -5   9  -4    0.26    0.23
   5  -9   4    0.52    0.29
  -6   9  -4    3.72    0.52
  -6   9  -4    3.32    0.46
   6  -9   4    3.23    0.48
  -7   9  -4   -0.44    0.37
  -7   9  -4    0.55    0.39
   6   8  -4    4.03    0.72
   6   8  -4    5.58    0.75
  -6  -8   4    3.62    0.55
  -6  -8   4    5.05    0.76
   5   8  -4    2.45    0.42
   5   8  -4    1.19    0.44
  -5  -8   4    1.64    0.45
   4   8  -4    3.81    0.57
   4   8  -4    2.95    0.41
  -4  -8   4    2.94    0.43
   3   8  -4    5.78    0.46
   3   8  -4    6.34    0.52
  -3  -8   4    5.65    0.53
   2   8  -4   22.23    0.96
   2   8  -4   21.33    1.05
  -2  -8   4   20.92    1.06
   1   8  -4   27.34    1.18
   1   8  -4   26.94    1.09
  -1  -8   4   25.52    1.20
   0   8  -4   47.53    1.86
   0   8  -4   47.40    1.78
   0  -8   4   47.05    1.93
  -1   8  -4   34.82    1.35
  -1   8  -4   34.71    1.39
   1  -8   4   33.98    1.48
  -2   8  -4    1.64    0.18
  -2   8  -4    1.44    0.19
   2  -8   4    1.45    0.24
  -3   8  -4    1.80    0.22
  -3   8  -4    1.97    0.22
   3  -8   4    1.79    0.28
  -4   8  -4    2.11    0.28
  -4   8  -4    2.12    0.26
   4  -8   4    2.57    0.40
  -5   8  -4    1.12    0.25
  -5   8  -4    1.03    0.25
   5  -8   4    1.33    0.34
  -6   8  -4   50.81    2.06
  -6   8  -4   48.60    2.10
   6  -8   4   47.13    2.13
  -7   8  -4    0.79    0.39
  -7   8  -4    0.72    0.38
   6   7  -4   19.77    1.34
   6   7  -4   18.56    1.18
  -6  -7   4   18.63    1.27
  -6  -7   4   16.87    1.08
  -6  -7   4   17.28    1.12
   5   7  -4   14.30    1.05
   5   7  -4   15.03    0.91
  -5  -7   4   14.09    1.05
  -5  -7   4   14.16    0.89
   4   7  -4   32.70    1.44
   4   7  -4   31.40    1.54
  -4  -7   4   31.43    1.46
   3   7  -4   36.71    1.58
   3   7  -4   38.50    1.69
  -3  -7   4   39.39    1.67
   2   7  -4    8.76    0.56
   2   7  -4    8.85    0.49
  -2  -7   4    8.52    0.54
   1   7  -4    1.34    0.17
   1   7  -4    1.09    0.16
  -1  -7   4    1.19    0.20
   0   7  -4    0.26    0.11
   0   7  -4    0.21    0.08
   0  -7   4    0.26    0.12
   0  -7   4    0.32    0.12
  -1   7  -4   12.26    0.58
  -1   7  -4   12.02    0.55
   1  -7   4   12.79    0.68
  -2   7  -4   13.48    0.62
  -2   7  -4   13.16    0.62
   2  -7   4   13.36    0.71
  -3   7  -4   13.39    0.66
  -3   7  -4   13.55    0.65
   3  -7   4   13.55    0.74
  -4   7  -4    4.45    0.36
  -4   7  -4    4.31    0.36
   4  -7   4    3.91    0.43
  -5   7  -4   21.09    1.00
  -5   7  -4   21.32    1.05
   5  -7   4   20.81    1.09
  -6   7  -4    2.38    0.37
  -6   7  -4    2.13    0.33
   6  -7   4    1.90    0.37
  -7   7  -4   -0.28    0.35
  -7   7  -4    0.88    0.41
   7   6  -4    0.34    0.55
  -7  -6   4    1.58    0.52
  -7  -6   4    0.31    0.64
  -7  -6   4    0.86    0.77
   6   6  -4    1.58    0.44
   6   6  -4    3.00    0.60
  -6  -6   4    2.76    0.42
  -6  -6   4    3.12    0.57
  -6  -6   4    3.06    0.45
   5   6  -4    3.06    0.41
   5   6  -4    4.05    0.59
  -5  -6   4    3.41    0.49
  -5  -6   4    3.28    0.54
   4   6  -4   11.42    0.77
   4   6  -4   10.58    0.69
  -4  -6   4   11.47    0.70
   3   6  -4    2.28    0.30
   3   6  -4    1.78    0.28
  -3  -6   4    1.90    0.28
   2   6  -4  139.60    5.05
   2   6  -4  138.27    5.14
  -2  -6   4  140.96    5.13
   1   6  -4    0.19    0.08
   1   6  -4    0.14    0.10
  -1  -6   4    0.26    0.12
  -1  -6   4    0.18    0.11
   0   6  -4   28.14    1.16
   0   6  -4   25.90    1.08
   0   6  -4   25.38    1.03
   0  -6   4   27.82    1.07
   0  -6   4   25.91    1.14
  -1   6  -4   12.30    0.63
  -1   6  -4   11.72    0.54
   1  -6   4   13.23    0.59
   1  -6   4   12.65    0.58
   1  -6   4   11.79    0.64
  -2   6  -4    6.00    0.42
  -2   6  -4    5.52    0.40
  -2   6  -4    5.89    0.34
   2  -6   4    5.62    0.39
   2  -6   4    5.84    0.41
  -3   6  -4   14.50    0.69
  -3   6  -4   14.71    0.67
   3  -6   4   13.84    0.76
   3  -6   4   14.88    0.74
  -4   6  -4    0.19    0.14
  -4   6  -4    0.12    0.14
   4  -6   4   -0.24    0.19
  -5   6  -4   -0.08    0.16
  -5   6  -4    0.16    0.19
   5  -6   4    0.35    0.24
  -6   6  -4    2.26    0.34
  -6   6  -4    1.91    0.33
   6  -6   4    2.27    0.42
  -7   6  -4   10.92    0.84
  -7   6  -4   12.20    0.84
   7   5  -4    2.81    0.58
  -7  -5   4    4.69    0.72
  -7  -5   4    3.32    0.59
   6   5  -4    1.32    0.38
   6   5  -4    1.93    0.51
  -6  -5   4    0.86    0.32
  -6  -5   4    0.78    0.37
  -6  -5   4    0.40    0.43
   5   5  -4    4.26    0.54
   5   5  -4    5.70    0.60
  -5  -5   4    5.36    0.62
  -5  -5   4    4.49    0.49
   4   5  -4    4.74    0.52
   4   5  -4    4.57    0.44
  -4  -5   4    4.12    0.39
  -4  -5   4    3.70    0.48
   3   5  -4    6.19    0.42
   3   5  -4    6.00    0.46
  -3  -5   4    6.14    0.43
   2   5  -4    0.06    0.13
   2   5  -4    0.06    0.16
   2   5  -4   -0.05    0.09
  -2  -5   4    0.04    0.09
  -2  -5   4   -0.05    0.11
   1   5  -4  189.77    6.49
   1   5  -4  182.62    6.41
   1   5  -4  167.53    6.44
  -1  -5   4  188.03    6.42
  -1  -5   4  163.80    6.46
  -1  -5   4  189.01    6.38
   0   5  -4   40.09    1.53
   0   5  -4   42.53    1.63
   0   5  -4   39.23    1.56
   0  -5   4   41.91    1.54
   0  -5   4   41.19    1.53
   0  -5   4   41.09    1.63
  -1   5  -4    2.45    0.19
  -1   5  -4    2.67    0.27
  -1   5  -4    2.42    0.22
   1  -5   4    2.42    0.20
   1  -5   4    2.56    0.26
   1  -5   4    2.40    0.20
  -2   5  -4   19.53    0.79
  -2   5  -4   20.06    0.90
  -2   5  -4   17.88    0.81
   2  -5   4   20.88    0.83
   2  -5   4   18.22    0.90
  -3   5  -4    7.90    0.53
  -3   5  -4    6.94    0.42
  -3   5  -4    8.35    0.43
   3  -5   4    7.82    0.48
   3  -5   4    6.89    0.48
  -4   5  -4    5.05    0.37
  -4   5  -4    4.94    0.39
   4  -5   4    4.79    0.46
  -5   5  -4    2.92    0.37
  -5   5  -4    3.55    0.36
   5  -5   4    3.69    0.46
  -6   5  -4    0.67    0.26
  -6   5  -4    0.09    0.26
   6  -5   4    0.15    0.33
  -7   5  -4    0.13    0.35
  -7   5  -4    1.13    0.35
   7  -5   4    0.27    0.42
  -8   5  -4    2.36    0.47
   7   4  -4    0.83    0.51
  -7  -4   4    0.17    0.55
  -7  -4   4   -0.34    0.43
   6   4  -4    1.53    0.43
  -6  -4   4    1.80    0.34
  -6  -4   4    1.19    0.42
  -6  -4   4    1.42    0.35
   5   4  -4    4.43    0.60
   5   4  -4    3.95    0.52
  -5  -4   4    3.92    0.42
  -5  -4   4    5.23    0.60
   4   4  -4   49.87    2.10
   4   4  -4   49.20    2.00
  -4  -4   4   46.31    1.92
  -4  -4   4   47.84    2.08
   3   4  -4   79.79    3.02
   3   4  -4   75.20    3.08
   3   4  -4   84.06    3.03
  -3  -4   4   82.27    3.02
  -3  -4   4   76.38    2.97
   2   4  -4   63.07    2.26
   2   4  -4   56.95    2.22
   2   4  -4   55.31    2.28
  -2  -4   4   57.19    2.23
  -2  -4   4   61.71    2.19
   1   4  -4    0.12    0.07
   1   4  -4    0.12    0.12
   1   4  -4    0.11    0.11
  -1  -4   4    0.09    0.07
  -1  -4   4    0.21    0.10
  -1  -4   4    0.18    0.06
   0   4  -4  217.01    7.89
   0   4  -4  232.29    7.97
   0   4  -4  219.74    7.91
   0  -4   4  225.90    7.98
   0  -4   4  227.98    7.90
   0  -4   4  223.14    7.89
  -1   4  -4  152.54    5.58
  -1   4  -4  155.86    5.61
   1  -4   4  163.48    5.62
   1  -4   4  159.26    5.70
   1  -4   4  159.79    5.59
  -2   4  -4   59.26    2.33
  -2   4  -4   63.72    2.30
  -2   4  -4   65.87    2.42
   2  -4   4   62.31    2.37
   2  -4   4   61.92    2.42
   2  -4   4   66.12    2.33
  -3   4  -4   29.35    1.12
  -3   4  -4   25.07    1.13
  -3   4  -4   28.60    1.24
   3  -4   4   27.23    1.22
   3  -4   4   28.31    1.16
  -4   4  -4   99.04    3.94
  -4   4  -4  107.25    3.91
   4  -4   4  109.39    4.04
   4  -4   4  111.15    3.98
  -5   4  -4   58.73    2.34
  -5   4  -4   59.18    2.29
   5  -4   4   56.83    2.38
  -6   4  -4   10.82    0.71
   6  -4   4   10.69    0.80
  -7   4  -4    6.46    0.65
  -7   4  -4    7.52    0.71
   7  -4   4    6.07    0.79
  -8   4  -4    1.11    0.42
   7   3  -4   26.03    1.45
  -7  -3   4   25.32    1.54
  -7  -3   4   24.77    1.41
   6   3  -4    0.46    0.38
  -6  -3   4    0.67    0.38
  -6  -3   4    0.89    0.42
  -6  -3   4    0.90    0.26
   5   3  -4    1.64    0.38
   5   3  -4    2.21    0.35
  -5  -3   4    2.11    0.40
  -5  -3   4    1.74    0.24
   4   3  -4    0.20    0.18
   4   3  -4   -0.24    0.21
  -4  -3   4   -0.04    0.12
  -4  -3   4   -0.28    0.22
  -4  -3   4    0.17    0.21
   3   3  -4   34.56    1.48
   3   3  -4   35.52    1.55
   3   3  -4   38.33    1.47
  -3  -3   4   34.43    1.55
  -3  -3   4   36.45    1.46
  -3  -3   4   37.74    1.44
   2   3  -4    1.75    0.22
   2   3  -4    2.49    0.25
   2   3  -4    1.64    0.24
  -2  -3   4    2.12    0.21
  -2  -3   4    2.29    0.22
  -2  -3   4    2.37    0.25
   1   3  -4   20.42    0.83
   1   3  -4   19.94    0.80
   1   3  -4   19.02    0.83
  -1  -3   4   19.16    0.82
  -1  -3   4   20.30    0.78
  -1  -3   4   19.75    0.82
   0   3  -4   75.77    2.79
   0   3  -4   75.12    2.81
   0   3  -4   80.41    2.86
   0  -3   4   78.49    2.79
   0  -3   4   80.28    2.88
   0  -3   4   78.71    2.79
  -1   3  -4  318.04   11.40
  -1   3  -4  323.90   11.44
  -1   3  -4  349.55   11.54
   1  -3   4  329.61   11.41
   1  -3   4  328.66   11.45
   1  -3   4  308.30   11.52
  -2   3  -4   16.61    0.80
  -2   3  -4   16.81    0.72
  -2   3  -4   16.85    0.67
   2  -3   4   16.55    0.74
   2  -3   4   17.16    0.81
   2  -3   4   17.41    0.69
  -3   3  -4    0.65    0.13
  -3   3  -4    0.92    0.14
  -3   3  -4    1.10    0.23
   3  -3   4    1.08    0.18
   3  -3   4    0.69    0.18
  -4   3  -4    0.67    0.23
  -4   3  -4    0.32    0.16
   4  -3   4    0.16    0.21
   4  -3   4    0.45    0.20
  -5   3  -4   40.93    1.68
  -5   3  -4   39.69    1.71
   5  -3   4   40.97    1.78
  -6   3  -4   44.01    1.90
  -6   3  -4   44.54    1.85
   6  -3   4   42.58    1.94
  -7   3  -4    0.61    0.36
  -7   3  -4    0.86    0.38
   7  -3   4    0.92    0.47
  -8   3  -4    1.97    0.49
   8   2  -4    0.40    0.58
  -8  -2   4   -0.36    0.55
  -8  -2   4    0.78    0.64
   7   2  -4    3.99    0.60
  -7  -2   4    4.19    0.60
  -7  -2   4    3.41    0.66
  -6  -2   4   12.42    0.98
  -6  -2   4   11.78    0.66
   5   2  -4   11.10    0.72
  -5  -2   4   12.12    0.80
  -5  -2   4   10.77    0.60
  -5  -2   4   12.74    0.74
   4   2  -4    0.21    0.15
   4   2  -4   -0.02    0.17
  -4  -2   4    0.18    0.19
  -4  -2   4    0.00    0.12
  -4  -2   4    0.20    0.18
   3   2  -4    4.64    0.32
   3   2  -4    3.58    0.32
   3   2  -4    3.79    0.36
  -3  -2   4    4.16    0.28
  -3  -2   4    4.00    0.36
  -3  -2   4    4.59    0.33
   2   2  -4   16.66    0.79
   2   2  -4   16.48    0.69
   2   2  -4   16.23    0.74
  -2  -2   4   17.11    0.72
  -2  -2   4   16.25    0.78
  -2  -2   4   15.70    0.68
   1   2  -4   34.67    1.27
   1   2  -4   32.44    1.26
   1   2  -4   33.23    1.30
  -1  -2   4   33.08    1.27
  -1  -2   4   33.16    1.28
  -1  -2   4   32.33    1.24
   0   2  -4   18.65    0.76
   0   2  -4   17.49    0.70
   0   2  -4   17.67    0.69
   0  -2   4   18.24    0.69
   0  -2   4   18.55    0.69
   0  -2   4   17.38    0.75
  -1   2  -4   64.26    2.44
  -1   2  -4   68.70    2.49
  -1   2  -4   69.51    2.58
   1  -2   4   70.71    2.60
   1  -2   4   70.47    2.45
   1  -2   4   72.54    2.51
  -2   2  -4   23.96    1.04
  -2   2  -4   23.21    0.88
  -2   2  -4   22.70    0.94
   2  -2   4   23.78    0.91
   2  -2   4   23.27    1.04
   2  -2   4   24.59    0.97
  -3   2  -4   13.50    0.61
  -3   2  -4   12.58    0.61
  -3   2  -4   12.09    0.71
  -3   2  -4   13.55    0.59
  -3   2  -4   13.33    0.69
   3  -2   4   12.93    0.60
   3  -2   4   12.13    0.69
   3  -2   4   13.20    0.68
  -4   2  -4    7.18    0.47
  -4   2  -4    8.56    0.49
  -4   2  -4    8.64    0.52
   4  -2   4    7.66    0.56
  -5   2  -4    6.42    0.49
  -5   2  -4    6.83    0.50
   5  -2   4    6.93    0.59
  -6   2  -4    0.92    0.30
  -6   2  -4    1.56    0.27
   6  -2   4    1.45    0.35
  -7   2  -4   -0.62    0.36
  -7   2  -4    0.48    0.33
   7  -2   4   -0.09    0.41
  -8   2  -4    0.70    0.44
  -8  -1   4    1.89    0.64
  -8  -1   4    2.03    0.52
   7   1  -4    7.03    0.80
  -7  -1   4    6.66    0.79
  -7  -1   4    7.43    0.78
   6   1  -4    0.42    0.41
  -6  -1   4    0.73    0.49
  -6  -1   4    0.49    0.37
  -6  -1   4    0.69    0.19
   5   1  -4   31.34    1.48
  -5  -1   4   33.10    1.35
  -5  -1   4   31.44    1.55
  -5  -1   4   30.48    1.45
  -5  -1   4   32.94    1.29
   4   1  -4   14.09    0.78
  -4  -1   4   15.09    0.68
  -4  -1   4   14.22    0.63
  -4  -1   4   13.32    0.82
   3   1  -4   16.32    0.81
   3   1  -4   19.14    0.75
  -3  -1   4   17.67    0.71
  -3  -1   4   17.62    0.73
  -3  -1   4   16.15    0.86
   2   1  -4  100.08    3.81
   2   1  -4  105.97    3.81
   2   1  -4  102.49    3.68
   2   1  -4  102.51    3.77
  -2  -1   4  102.54    3.68
  -2  -1   4  104.06    3.82
  -2  -1   4  106.00    3.75
   1   1  -4   61.50    2.27
   1   1  -4   65.46    2.31
   1   1  -4   61.32    2.31
   1   1  -4   63.49    2.26
  -1  -1   4   60.10    2.30
  -1  -1   4   60.69    2.26
  -1  -1   4   63.50    2.26
  -1  -1   4   62.93    2.31
   0   1  -4   23.08    0.86
   0   1  -4   22.46    0.88
   0   1  -4   23.72    0.94
   0  -1   4   24.08    0.94
   0  -1   4   22.66    0.88
   0  -1   4   23.10    0.87
   0  -1   4   23.46    0.86
  -1   1  -4  158.34    5.44
  -1   1  -4  143.05    5.32
   1  -1   4  153.25    5.33
   1  -1   4  149.68    5.44
  -2   1  -4   16.84    0.65
  -2   1  -4   16.42    0.69
  -2   1  -4   17.48    0.81
  -2   1  -4   16.41    0.65
   2  -1   4   17.77    0.82
   2  -1   4   16.05    0.71
  -3   1  -4    4.29    0.36
  -3   1  -4    3.96    0.29
  -3   1  -4    4.14    0.28
  -3   1  -4    3.84    0.28
  -3   1  -4    4.12    0.42
   3  -1   4    3.99    0.34
   3  -1   4    3.59    0.36
  -4   1  -4    9.35    0.53
  -4   1  -4    8.90    0.53
  -4   1  -4    9.87    0.55
   4  -1   4    9.21    0.61
  -5   1  -4    2.90    0.34
  -5   1  -4    2.75    0.39
   5  -1   4    2.09    0.33
  -6   1  -4   24.57    1.24
  -6   1  -4   27.31    1.27
   6  -1   4   25.43    1.34
  -7   1  -4   -0.49    0.39
  -7   1  -4    0.26    0.34
  -7   1  -4   -0.93    0.43
   7  -1   4   -0.07    0.40
  -8   0   4    1.19    0.50
  -8   0   4    0.84    0.58
   7   0  -4    4.24    0.62
  -7   0   4    4.01    0.62
  -7   0   4    3.39    0.56
   6   0  -4   23.16    1.43
  -6   0   4   24.46    0.98
  -6   0   4   23.83    1.29
  -6   0   4   20.69    1.35
   5   0  -4   15.24    0.87
  -5   0   4   16.46    0.74
  -5   0   4   15.71    0.67
  -5   0   4   14.16    0.84
  -5   0   4   14.81    0.94
   4   0  -4   14.28    0.77
  -4   0   4   14.49    0.85
  -4   0   4   15.01    0.61
  -4   0   4   15.15    0.65
   3   0  -4    1.70    0.25
  -3   0   4    1.66    0.26
  -3   0   4    1.63    0.13
  -3   0   4    1.61    0.16
   2   0  -4    0.65    0.17
   2   0  -4    0.60    0.10
   2   0  -4    0.52    0.12
  -2   0   4    0.61    0.15
  -2   0   4    0.60    0.20
  -2   0   4    0.67    0.09
  -2   0   4    0.85    0.14
   1   0  -4   15.42    0.67
   1   0  -4   15.39    0.61
  -1   0   4   15.08    0.61
  -1   0   4   14.11    0.65
  -1   0   4   15.71    0.62
  -1   0   4   14.97    0.66
   0   0  -4    8.88    0.44
   0   0  -4    9.15    0.37
   0   0  -4    9.47    0.40
   0   0   4    9.21    0.39
   0   0   4    9.71    0.46
   0   0   4    9.17    0.37
  -1   0  -4  186.30    6.41
  -1   0  -4  172.28    6.23
  -1   0  -4  169.72    6.26
   1   0   4  178.97    6.27
   1   0   4  185.26    6.41
  -2   0  -4   94.11    3.25
  -2   0  -4   89.40    3.27
  -2   0  -4   89.90    3.29
  -2   0  -4   94.94    3.44
   2   0   4   93.23    3.32
   2   0   4   90.60    3.47
   2   0   4   89.27    3.27
  -3   0  -4    0.46    0.13
  -3   0  -4    0.30    0.11
  -3   0  -4    0.31    0.11
  -3   0  -4    0.60    0.18
   3   0   4    0.43    0.18
   3   0   4    0.12    0.14
  -4   0  -4    9.90    0.56
  -4   0  -4   11.17    0.61
  -4   0  -4   10.94    0.57
   4   0   4   10.99    0.68
  -5   0  -4    7.08    0.50
  -5   0  -4    6.79    0.54
   5   0   4    6.54    0.59
  -6   0  -4    0.11    0.26
  -6   0  -4    0.13    0.28
   6   0   4    0.20    0.32
  -7   0  -4    2.09    0.53
  -7   0  -4    1.78    0.46
  -7   0  -4    1.18    0.35
   7   0   4    1.30    0.50
  -8   1   4    1.88    0.68
  -8   1   4    1.36    0.58
   7  -1  -4    2.32    0.47
  -7   1   4    1.98    0.46
  -7   1   4    1.57    0.53
   6  -1  -4    1.64    0.53
  -6   1   4    1.65    0.51
  -6   1   4    1.01    0.35
   5  -1  -4   66.36    2.69
  -5   1   4   64.07    2.72
  -5   1   4   65.50    2.37
  -5   1   4   70.43    2.40
  -5   1   4   62.89    2.66
   4  -1  -4    7.59    0.52
  -4   1   4    8.76    0.62
  -4   1   4    7.76    0.52
   3  -1  -4  170.81    6.18
  -3   1   4  170.37    6.23
   2  -1  -4   43.52    1.71
   2  -1  -4   45.21    1.77
  -2   1   4   45.19    1.71
  -2   1   4   43.65    1.75
   1  -1  -4  401.05   13.95
   1  -1  -4  406.07   14.01
   1  -1  -4  389.88   13.96
  -1   1   4  406.19   14.00
  -1   1   4  382.44   13.94
  -1   1   4  404.56   13.95
   0  -1  -4  133.87    4.78
   0  -1  -4  136.39    4.82
   0  -1  -4  142.86    4.89
   0   1   4  130.45    4.77
   0   1   4  142.50    4.89
   0   1   4  130.92    4.80
  -1  -1  -4    0.32    0.05
  -1  -1  -4    0.33    0.14
  -1  -1  -4    0.21    0.05
   1   1   4    0.25    0.06
   1   1   4    0.23    0.11
   1   1   4    0.24    0.05
  -2  -1  -4    9.19    0.38
  -2  -1  -4    8.98    0.44
  -2  -1  -4    9.00    0.41
  -2  -1  -4    8.95    0.57
   2   1   4    9.19    0.43
   2   1   4    9.08    0.41
   2   1   4    8.31    0.51
  -3  -1  -4    7.24    0.46
  -3  -1  -4    6.65    0.41
  -3  -1  -4    7.67    0.41
  -3  -1  -4    7.69    0.38
   3   1   4    6.35    0.50
   3   1   4    7.40    0.42
  -4  -1  -4    5.31    0.38
  -4  -1  -4    5.62    0.39
  -4  -1  -4    5.48    0.42
   4   1   4    6.54    0.53
  -5  -1  -4   11.44    0.64
  -5  -1  -4   10.44    0.68
   5   1   4   10.57    0.76
  -6  -1  -4    3.61    0.49
  -6  -1  -4    3.60    0.46
  -6  -1  -4    4.89    0.66
   6   1   4    3.69    0.52
  -7  -1  -4    0.20    0.35
  -7  -1  -4    0.63    0.49
   7   1   4    0.25    0.47
  -8   2   4    7.66    0.98
  -8   2   4    9.16    1.09
  -7   2   4    2.25    0.46
  -7   2   4    1.89    0.48
  -6   2   4    0.63    0.30
   5  -2  -4   11.25    0.73
  -5   2   4   11.99    0.78
  -5   2   4   12.18    0.76
   4  -2  -4   24.38    1.15
  -4   2   4   25.13    1.20
  -4   2   4   24.65    1.14
   3  -2  -4    5.74    0.40
  -3   2   4    5.41    0.41
  -3   2   4    6.13    0.41
   2  -2  -4   18.03    0.85
   2  -2  -4   17.28    0.79
  -2   2   4   18.36    0.79
   1  -2  -4  142.69    5.08
   1  -2  -4  144.28    5.08
   1  -2  -4  138.88    5.13
  -1   2   4  144.46    5.12
  -1   2   4  141.52    5.08
  -1   2   4  145.79    5.07
   0  -2  -4    3.49    0.27
   0  -2  -4    3.36    0.22
   0  -2  -4    3.33    0.16
   0   2   4    3.25    0.25
   0   2   4    3.23    0.14
   0   2   4    3.09    0.20
  -1  -2  -4  369.77   12.14
  -1  -2  -4  318.87   11.93
  -1  -2  -4  342.49   11.93
  -1  -2  -4  348.32   11.96
   1   2   4  338.07   12.11
   1   2   4  349.16   11.93
   1   2   4  325.31   11.95
  -2  -2  -4    0.92    0.13
  -2  -2  -4    1.02    0.14
  -2  -2  -4    1.18    0.14
   2   2   4    0.93    0.14
   2   2   4    1.02    0.22
  -3  -2  -4    9.81    0.47
  -3  -2  -4   10.11    0.49
  -3  -2  -4    9.34    0.53
   3   2   4    9.17    0.62
   3   2   4   10.25    0.55
  -4  -2  -4    2.04    0.27
  -4  -2  -4    2.60    0.32
  -4  -2  -4    1.86    0.27
   4   2   4    2.76    0.34
   4   2   4    2.79    0.41
  -5  -2  -4   18.22    0.92
  -5  -2  -4   19.53    1.12
  -5  -2  -4   19.14    0.99
   5   2   4   19.97    1.10
  -6  -2  -4    0.42    0.41
  -6  -2  -4    1.30    0.36
  -6  -2  -4    0.69    0.29
   6   2   4    1.05    0.44
  -7  -2  -4    9.07    0.94
  -7  -2  -4    9.65    0.78
   7   2   4    8.30    1.00
  -8   3   4    5.21    0.80
  -8   3   4    6.75    0.92
  -7   3   4    0.45    0.41
  -7   3   4    0.57    0.38
  -6   3   4    6.34    0.73
  -6   3   4    6.44    0.63
   5  -3  -4   51.99    2.17
  -5   3   4   48.73    2.18
  -5   3   4   51.84    2.15
   4  -3  -4   47.46    1.96
  -4   3   4   46.42    2.00
  -4   3   4   48.31    1.96
   3  -3  -4   97.25    3.68
  -3   3   4   97.98    3.68
  -3   3   4  101.47    3.75
   2  -3  -4  320.26   11.76
   2  -3  -4  328.25   11.77
   2  -3  -4  348.74   11.88
   2  -3  -4  336.51   11.94
  -2   3   4  342.65   11.88
  -2   3   4  320.94   11.92
  -2   3   4  357.20   11.88
   1  -3  -4    2.31    0.22
   1  -3  -4    2.24    0.21
   1  -3  -4    2.28    0.25
   1  -3  -4    2.30    0.18
  -1   3   4    2.04    0.20
  -1   3   4    1.89    0.21
  -1   3   4    2.33    0.18
  -1   3   4    2.29    0.18
   0  -3  -4    1.61    0.23
   0  -3  -4    1.13    0.18
   0   3   4    1.47    0.20
   0   3   4    1.40    0.15
  -1  -3  -4   23.15    0.87
   1   3   4   20.44    0.99
   1   3   4   22.05    0.86
  -2  -3  -4  202.08    7.15
  -2  -3  -4  199.23    7.17
  -2  -3  -4  212.54    7.16
   2   3   4  208.73    7.21
   2   3   4  192.73    7.37
  -3  -3  -4    0.62    0.18
  -3  -3  -4    0.60    0.16
  -3  -3  -4    0.62    0.14
   3   3   4    1.02    0.24
  -4  -3  -4    5.98    0.46
  -4  -3  -4    5.96    0.58
  -4  -3  -4    5.25    0.39
   4   3   4    5.92    0.47
   4   3   4    5.44    0.56
  -5  -3  -4   11.63    0.87
  -5  -3  -4   10.63    0.65
  -5  -3  -4   11.44    0.75
   5   3   4   10.51    0.82
   5   3   4   12.69    0.76
  -6  -3  -4    6.56    0.71
  -6  -3  -4    6.55    0.59
  -6  -3  -4    6.61    0.77
   6   3   4    7.26    0.78
  -7  -3  -4    8.07    0.73
  -7  -3  -4    7.29    1.04
   7   3   4    8.99    1.00
  -8   4   4   15.82    1.16
  -8   4   4   16.09    1.23
  -7   4   4    1.88    0.44
  -7   4   4    2.48    0.47
  -6   4   4    4.48    0.59
  -5   4   4   20.49    1.09
  -5   4   4   21.32    1.15
   4  -4  -4   23.64    1.10
  -4   4   4   22.73    1.12
  -4   4   4   22.70    1.09
   3  -4  -4   33.73    1.40
  -3   4   4   33.33    1.45
  -3   4   4   33.17    1.39
   2  -4  -4  140.77    5.03
   2  -4  -4  136.26    4.95
   2  -4  -4  142.13    4.97
  -2   4   4  143.50    5.03
  -2   4   4  132.74    5.08
  -2   4   4  141.64    5.03
   1  -4  -4   12.04    0.58
   1  -4  -4   12.74    0.61
   1  -4  -4   12.51    0.63
  -1   4   4   12.84    0.53
  -1   4   4   12.91    0.54
  -1   4   4   10.58    0.61
  -1   4   4   12.30    0.58
   0  -4  -4   23.98    1.04
   0  -4  -4   22.97    1.03
   0  -4  -4   22.85    0.97
   0   4   4   23.26    1.02
   0   4   4   22.80    0.93
  -1  -4  -4  311.67   10.67
   1   4   4  306.86   10.66
   1   4   4  289.36   10.81
  -2  -4  -4    1.37    0.21
  -2  -4  -4    1.77    0.15
  -2  -4  -4    1.92    0.28
  -2  -4  -4    1.69    0.15
   2   4   4    1.02    0.22
  -3  -4  -4   51.06    1.80
  -3  -4  -4   47.58    1.79
   3   4   4   46.17    1.88
   3   4   4   45.50    2.04
  -4  -4  -4   78.16    3.16
  -4  -4  -4   75.45    2.87
   4   4   4   77.72    3.15
   4   4   4   76.82    3.00
  -5  -4  -4    4.21    0.57
  -5  -4  -4    4.24    0.44
  -5  -4  -4    3.80    0.56
   5   4   4    3.81    0.58
   5   4   4    5.54    0.57
  -6  -4  -4   12.88    0.79
  -6  -4  -4   13.29    1.05
  -6  -4  -4   13.37    0.96
   6   4   4   11.93    1.00
  -7  -4  -4    9.09    1.05
   7   4   4    9.47    1.02
  -8   5   4    0.99    0.51
  -8   5   4    1.27    0.59
  -7   5   4    6.86    0.78
  -7   5   4    4.89    0.70
  -6   5   4    2.62    0.43
  -6   5   4    3.11    0.46
  -5   5   4   23.96    1.17
  -5   5   4   23.62    1.24
  -4   5   4   35.31    1.57
  -4   5   4   34.23    1.50
   3  -5  -4   11.22    0.47
   3  -5  -4   11.55    0.49
  -3   5   4   10.29    0.62
  -3   5   4   10.47    0.58
   2  -5  -4   18.25    0.79
   2  -5  -4   19.88    0.84
  -2   5   4   17.90    0.87
  -2   5   4   18.96    0.84
  -2   5   4   20.41    0.84
   1  -5  -4   13.06    0.66
   1  -5  -4   12.84    0.63
  -1   5   4   12.16    0.54
  -1   5   4   12.81    0.53
  -1   5   4   10.99    0.58
   0  -5  -4   43.84    1.66
   0  -5  -4   42.18    1.73
   0  -5  -4   42.30    1.72
   0   5   4   40.36    1.60
   0   5   4   41.42    1.70
  -1  -5  -4   28.24    1.13
  -1  -5  -4   27.30    1.26
   1   5   4   27.44    1.25
   1   5   4   27.36    1.11
  -2  -5  -4  233.18    8.82
  -2  -5  -4  246.58    8.50
  -2  -5  -4  252.02    8.49
   2   5   4  242.43    8.65
   2   5   4  239.77    8.83
  -3  -5  -4   53.76    1.86
  -3  -5  -4   48.45    2.16
  -3  -5  -4   51.67    1.87
   3   5   4   47.10    2.15
   3   5   4   49.13    2.00
  -4  -5  -4    3.40    0.47
  -4  -5  -4    2.99    0.30
   4   5   4    3.44    0.46
   4   5   4    2.76    0.42
  -5  -5  -4    0.57    0.23
  -5  -5  -4    1.22    0.34
  -5  -5  -4    0.20    0.35
   5   5   4    0.55    0.38
   5   5   4    0.26    0.35
  -6  -5  -4    1.61    0.50
  -6  -5  -4    1.59    0.51
   6   5   4    1.18    0.49
   6   5   4    2.90    0.52
  -7   6   4    0.28    0.45
  -7   6   4   -0.31    0.42
  -6   6   4   -0.21    0.32
  -6   6   4    0.19    0.33
  -5   6   4    3.69    0.45
  -5   6   4    2.34    0.40
  -4   6   4    0.21    0.18
  -4   6   4   -0.11    0.21
   3  -6  -4   20.51    0.82
   3  -6  -4   20.24    0.84
  -3   6   4   18.62    0.96
  -3   6   4   19.18    0.90
   2  -6  -4    1.71    0.25
   2  -6  -4    1.83    0.24
  -2   6   4    1.46    0.24
  -2   6   4    2.16    0.25
  -2   6   4    1.60    0.24
   1  -6  -4    1.27    0.23
   1  -6  -4    1.43    0.26
  -1   6   4    1.52    0.15
  -1   6   4    1.25    0.19
  -1   6   4    1.38    0.21
   0  -6  -4    4.12    0.38
   0   6   4    3.94    0.28
  -1  -6  -4    0.09    0.15
   1   6   4   -0.14    0.16
   1   6   4    0.26    0.11
  -2  -6  -4    3.21    0.44
   2   6   4    3.44    0.31
   2   6   4    3.63    0.43
  -3  -6  -4   -0.19    0.12
  -3  -6  -4   -0.06    0.11
  -3  -6  -4   -0.47    0.25
   3   6   4   -0.10    0.20
   3   6   4   -0.05    0.25
  -4  -6  -4    0.63    0.18
  -4  -6  -4    0.53    0.29
   4   6   4    0.24    0.26
   4   6   4    0.55    0.28
  -5  -6  -4    0.27    0.36
  -5  -6  -4   -0.16    0.36
   5   6   4    0.06    0.38
   5   6   4    0.24    0.39
  -6  -6  -4    6.85    0.92
  -6  -6  -4    8.30    0.94
   6   6   4    7.66    1.10
  -7   7   4   34.99    1.74
  -7   7   4   34.01    1.76
  -6   7   4    0.03    0.31
  -6   7   4    0.10    0.34
  -5   7   4    2.09    0.39
  -5   7   4    2.23    0.40
   4  -7  -4    8.28    0.44
   4  -7  -4    9.04    0.47
  -4   7   4    8.19    0.58
  -4   7   4    9.11    0.66
   3  -7  -4    1.08    0.18
   3  -7  -4    0.82    0.23
  -3   7   4    1.04    0.19
  -3   7   4    0.88    0.19
   2  -7  -4   13.87    0.76
   2  -7  -4   13.96    0.70
  -2   7   4   16.03    0.74
  -2   7   4   14.66    0.75
  -2   7   4   14.17    0.66
   1  -7  -4   12.77    0.70
  -1   7   4   13.70    0.61
  -1   7   4   12.42    0.66
  -1   7   4   14.32    0.56
   0  -7  -4   14.46    0.77
   0   7   4   13.16    0.66
  -1  -7  -4   40.79    1.76
   1   7   4   38.67    1.58
  -2  -7  -4   67.98    2.82
   2   7   4   68.95    2.81
   2   7   4   67.75    2.63
  -3  -7  -4    3.39    0.26
  -3  -7  -4    3.41    0.53
   3   7   4    2.74    0.45
   3   7   4    3.17    0.42
  -4  -7  -4    0.14    0.37
   4   7   4    0.09    0.31
   4   7   4    0.32    0.36
  -5  -7  -4    0.59    0.41
   5   7   4    1.23    0.43
  -6  -7  -4    0.23    0.54
  -7   8   4   23.41    1.40
  -7   8   4   21.09    1.33
  -6   8   4    0.11    0.32
  -6   8   4   -0.06    0.31
  -5   8   4    9.49    0.76
  -5   8   4    9.15    0.68
   4  -8  -4    5.16    0.40
  -4   8   4    5.70    0.54
  -4   8   4    5.55    0.47
   3  -8  -4   74.25    2.88
   3  -8  -4   78.44    2.93
  -3   8   4   77.18    2.91
  -3   8   4   78.42    3.03
   2  -8  -4    0.08    0.17
  -2   8   4    0.03    0.16
  -2   8   4    0.22    0.24
  -2   8   4    0.13    0.12
   1  -8  -4   33.05    1.50
  -1   8   4   36.43    1.36
  -1   8   4   32.62    1.43
  -1   8   4   36.72    1.30
   0  -8  -4    1.54    0.31
   0   8   4    0.89    0.18
  -1  -8  -4    0.14    0.23
   1   8   4    0.20    0.16
  -2  -8  -4    0.62    0.30
   2   8   4    0.25    0.19
  -3  -8  -4    4.14    0.57
   3   8   4    4.96    0.50
  -4  -8  -4    1.15    0.43
   4   8   4    1.51    0.40
  -5  -8  -4    3.91    0.63
   5   8   4    5.53    0.80
  -7   9   4   15.11    1.11
  -7   9   4   16.71    1.18
  -6   9   4    1.85    0.41
  -6   9   4    3.17    0.50
  -5   9   4    3.88    0.53
  -5   9   4    4.60    0.57
   4  -9  -4   27.26    1.34
  -4   9   4   28.98    1.27
   3  -9  -4    0.31    0.18
  -3   9   4    0.80    0.22
  -3   9   4    0.64    0.19
   2  -9  -4    0.89    0.23
  -2   9   4    0.94    0.16
  -2   9   4    1.11    0.23
  -2   9   4    1.08    0.32
   1  -9  -4  159.52    6.06
  -1   9   4  155.54    5.99
  -1   9   4  171.81    5.81
  -1   9   4  171.33    5.87
   0  -9  -4    0.61    0.25
   0   9   4    0.42    0.18
  -1  -9  -4    3.54    0.48
   1   9   4    3.90    0.38
  -2  -9  -4   -0.09    0.36
   2   9   4    0.18    0.22
  -3  -9  -4    2.69    0.53
   3   9   4    2.83    0.40
  -4  -9  -4    0.76    0.44
   4   9   4    2.14    0.45
  -5  -9  -4    3.36    0.75
   5   9   4    4.13    0.67
  -6  10   4    2.70    0.49
  -6  10   4    3.51    0.48
  -5  10   4    3.95    0.52
  -5  10   4    3.44    0.53
   4 -10  -4    3.78    0.54
  -4  10   4    3.71    0.52
  -4  10   4    3.87    0.44
   3 -10  -4   71.96    2.84
  -3  10   4   75.39    2.79
   2 -10  -4    0.56    0.22
  -2  10   4    0.56    0.21
  -2  10   4    0.56    0.15
   1 -10  -4    8.62    0.67
  -1  10   4    7.78    0.54
  -1  10   4    9.44    0.41
   0 -10  -4   18.89    1.06
   0  10   4   18.29    0.91
  -1 -10  -4    8.70    0.73
   1  10   4    9.43    0.61
  -2 -10  -4   14.36    1.03
   2  10   4   15.01    0.86
  -3 -10  -4   26.52    1.51
   3  10   4   27.91    1.39
  -4 -10  -4    1.42    0.54
   4  10   4    1.56    0.49
  -6  11   4    0.16    0.40
  -6  11   4    0.34    0.40
  -5  11   4    1.30    0.41
  -5  11   4    0.07    0.32
  -4  11   4   -0.22    0.25
  -4  11   4   -0.02    0.26
   3 -11  -4   15.72    0.89
  -3  11   4   16.31    0.79
  -3  11   4   17.03    0.95
   2 -11  -4    3.74    0.48
  -2  11   4    3.00    0.29
  -2  11   4    3.93    0.45
   1 -11  -4   30.57    1.47
   0 -11  -4    9.07    0.76
  -1 -11  -4    3.28    0.56
   1  11   4    4.43    0.50
  -2 -11  -4   11.38    0.92
   2  11   4    8.66    0.75
  -3 -11  -4   10.32    1.03
   3  11   4   10.32    0.88
  -4 -11  -4    2.78    0.66
   4  11   4    3.60    0.59
  -5  12   4   -0.17    0.36
  -5  12   4   -0.54    0.35
  -4  12   4    1.00    0.30
  -4  12   4    1.44    0.37
   3 -12  -4    4.46    0.56
  -3  12   4    5.00    0.51
  -3  12   4    4.68    0.43
   2 -12  -4    1.48    0.36
  -2  12   4    1.23    0.33
   1 -12  -4    1.51    0.40
  -1  12   4    1.50    0.30
   0 -12  -4    6.31    0.73
   0  12   4    6.01    0.54
  -1 -12  -4    1.92    0.45
   1  12   4    1.95    0.38
  -2 -12  -4    0.03    0.47
   2  12   4    0.43    0.37
  -3 -12  -4    3.56    0.68
   3  12   4    3.99    0.59
  -5  13   4    3.29    0.56
  -5  13   4    4.40    0.63
  -4  13   4    9.53    0.80
   3 -13  -4    2.79    0.46
  -3  13   4    2.32    0.40
  -2  13   4    9.33    0.68
   1 -13  -4    0.19    0.37
  -1  13   4    0.13    0.27
   0 -13  -4   12.70    0.97
   0  13   4   11.54    0.81
  -1 -13  -4    0.81    0.49
   1  13   4    1.02    0.40
  -2 -13  -4   11.23    1.08
   2  13   4   10.48    0.90
  -4  14   4    8.17    0.82
  -3  14   4   -0.34    0.38
   2 -14  -4    0.88    0.46
  -2  14   4    0.56    0.35
   1 -14  -4    4.87    0.77
  -1  14   4    6.77    0.67
   0 -14  -4    0.91    0.53
   0  14   4    1.08    0.39
  -1 -14  -4    5.31    0.75
   1  14   4    4.33    0.63
   1  16  -5    0.17    0.42
  -1 -16   5   -0.13    0.54
   0  16  -5    3.89    0.57
   0 -16   5    3.81    0.63
  -1  16  -5    2.68    0.35
  -1  16  -5    2.72    0.47
   1 -16   5    2.68    0.57
  -2  16  -5    0.09    0.28
  -2  16  -5   -0.68    0.36
   2 -16   5   -0.52    0.49
  -3  16  -5    1.50    0.41
  -3  16  -5    0.58    0.31
   3 -16   5    1.01    0.56
   2  15  -5    0.28    0.45
  -2 -15   5    0.73    0.50
   1  15  -5    4.96    0.70
   1  15  -5    2.98    0.43
  -1 -15   5    3.30    0.54
   0  15  -5    0.89    0.44
   0  15  -5    1.05    0.29
   0 -15   5    0.89    0.40
  -1  15  -5    2.34    0.45
  -1  15  -5    1.58    0.27
   1 -15   5    1.36    0.47
  -2  15  -5    3.13    0.44
  -2  15  -5    4.58    0.58
   2 -15   5    2.94    0.57
  -3  15  -5    5.57    0.57
  -3  15  -5    5.54    0.51
   3 -15   5    5.45    0.85
  -4  15  -5   -0.37    0.33
  -4  15  -5    0.71    0.29
   3  14  -5   20.73    1.49
  -3 -14   5   25.58    1.50
   2  14  -5    4.18    0.63
   2  14  -5    3.85    0.46
  -2 -14   5    3.74    0.63
   1  14  -5    0.31    0.27
   1  14  -5    0.56    0.37
  -1 -14   5    0.33    0.40
   0  14  -5   55.66    2.26
   0  14  -5   59.35    2.48
   0 -14   5   57.93    2.58
  -1  14  -5    8.48    0.70
  -1  14  -5    9.23    0.54
   1 -14   5    8.07    0.82
  -2  14  -5   12.27    0.91
  -2  14  -5   13.26    0.81
   2 -14   5   11.90    0.95
  -3  14  -5   26.30    1.27
  -3  14  -5   25.45    1.18
   3 -14   5   25.13    1.44
  -4  14  -5    3.58    0.48
  -4  14  -5    3.54    0.45
   4 -14   5    3.70    0.60
  -5  14  -5    0.30    0.32
  -5  14  -5   -0.73    0.33
   5 -14   5   -0.08    0.55
   4  13  -5    0.95    0.58
  -4 -13   5    0.20    0.49
   3  13  -5    0.92    0.58
   3  13  -5    1.28    0.37
  -3 -13   5    0.50    0.42
   2  13  -5   21.37    1.27
   2  13  -5   22.10    1.09
  -2 -13   5   21.44    1.31
   1  13  -5   20.55    1.13
   1  13  -5   18.91    0.93
  -1 -13   5   19.45    1.18
   0  13  -5    0.31    0.25
   0  13  -5    0.09    0.18
   0 -13   5   -0.19    0.27
  -1  13  -5    3.23    0.47
  -1  13  -5    3.39    0.34
   1 -13   5    2.89    0.45
  -2  13  -5   11.94    0.64
  -2  13  -5   11.38    0.72
   2 -13   5   11.68    1.06
  -3  13  -5   12.68    0.79
  -3  13  -5   14.46    0.74
   3 -13   5   12.22    0.95
  -4  13  -5    0.39    0.26
  -4  13  -5    0.39    0.24
  -5  13  -5   -0.60    0.29
  -5  13  -5    0.14    0.31
   5 -13   5    0.54    0.48
  -6  13  -5    3.25    0.47
  -6  13  -5    1.92    0.42
   4  12  -5    7.99    0.80
   4  12  -5    8.55    0.98
  -4 -12   5    7.89    0.88
   3  12  -5    2.40    0.37
   3  12  -5    1.50    0.45
  -3 -12   5    1.16    0.44
   2  12  -5    6.59    0.66
   2  12  -5    6.08    0.52
  -2 -12   5    6.49    0.69
   1  12  -5    8.80    0.79
   1  12  -5    9.37    0.57
  -1 -12   5    9.47    0.73
   0  12  -5   33.55    1.51
   0  12  -5   32.72    1.34
   0 -12   5   31.59    1.55
  -1  12  -5    4.12    0.33
  -1  12  -5    4.40    0.45
   1 -12   5    4.61    0.56
  -2  12  -5    4.22    0.42
  -2  12  -5    3.72    0.34
   2 -12   5    4.13    0.53
  -3  12  -5    1.66    0.28
  -3  12  -5    1.04    0.23
   3 -12   5    1.26    0.34
  -4  12  -5   19.21    0.94
   4 -12   5   17.86    1.11
  -5  12  -5    6.12    0.56
  -5  12  -5    7.72    0.60
   5 -12   5    7.19    0.80
  -6  12  -5    5.43    0.62
  -6  12  -5    4.67    0.62
   5  11  -5    5.65    0.65
   5  11  -5    5.79    0.84
  -5 -11   5    6.77    0.83
   4  11  -5   17.87    1.22
   4  11  -5   20.73    1.10
  -4 -11   5   19.00    1.21
   3  11  -5    9.42    0.82
   3  11  -5    9.79    0.67
  -3 -11   5    9.54    0.81
   2  11  -5   20.11    0.96
   2  11  -5   19.05    1.40
  -2 -11   5   19.38    1.14
   1  11  -5    1.80    0.31
   1  11  -5    1.81    0.24
  -1 -11   5    1.94    0.36
   0  11  -5    3.59    0.38
   0  11  -5    3.27    0.30
   0 -11   5    3.32    0.45
  -1  11  -5   22.66    1.05
  -1  11  -5   22.79    0.96
   1 -11   5   20.96    1.12
  -2  11  -5   12.68    0.64
  -2  11  -5   12.44    0.68
   2 -11   5   11.97    0.80
  -3  11  -5    5.67    0.41
  -3  11  -5    5.63    0.44
   3 -11   5    5.23    0.58
  -4  11  -5   37.54    1.56
  -4  11  -5   36.04    1.58
   4 -11   5   35.31    1.70
  -5  11  -5   14.71    0.85
  -5  11  -5   14.69    0.85
   5 -11   5   15.47    1.02
  -6  11  -5    0.64    0.30
  -6  11  -5    0.06    0.33
   5  10  -5    0.03    0.40
   5  10  -5    0.54    0.55
  -5 -10   5    0.23    0.41
   4  10  -5   13.73    1.04
   4  10  -5   13.51    0.87
  -4 -10   5   13.26    0.92
   3  10  -5    2.23    0.46
   3  10  -5    1.99    0.30
  -3 -10   5    1.58    0.32
   2  10  -5    3.57    0.36
   2  10  -5    4.20    0.50
  -2 -10   5    3.41    0.46
   1  10  -5    5.18    0.38
   1  10  -5    6.05    0.49
  -1 -10   5    6.37    0.54
   0  10  -5   54.87    2.10
   0  10  -5   54.63    2.21
   0 -10   5   56.16    2.30
  -1  10  -5   17.09    0.77
  -1  10  -5   16.90    0.82
   1 -10   5   16.76    0.92
  -2  10  -5   32.32    1.31
  -2  10  -5   31.96    1.35
   2 -10   5   30.98    1.47
  -3  10  -5    0.61    0.17
  -3  10  -5    0.57    0.20
   3 -10   5    0.94    0.30
  -4  10  -5    4.46    0.41
  -4  10  -5    4.54    0.40
   4 -10   5    4.34    0.53
  -5  10  -5    9.59    0.64
  -5  10  -5    9.54    0.66
   5 -10   5    7.62    0.76
  -6  10  -5    2.50    0.42
   6 -10   5    3.10    0.49
  -7  10  -5   26.59    1.36
  -7  10  -5   25.65    1.38
   6   9  -5    1.22    0.51
   6   9  -5    2.23    0.65
  -6  -9   5   -0.13    0.66
  -6  -9   5    0.28    0.46
   5   9  -5   15.45    0.99
   5   9  -5   13.44    1.15
  -5  -9   5   15.46    1.20
  -5  -9   5   14.89    1.02
   4   9  -5    5.04    0.67
   4   9  -5    3.96    0.53
  -4  -9   5    4.81    0.56
   3   9  -5    0.18    0.21
   3   9  -5    0.97    0.28
  -3  -9   5    0.15    0.24
   2   9  -5    1.13    0.26
   2   9  -5    0.84    0.20
  -2  -9   5    1.21    0.28
   1   9  -5    2.31    0.23
   1   9  -5    2.48    0.29
  -1  -9   5    2.33    0.36
   0   9  -5    9.77    0.56
   0   9  -5    9.73    0.49
   0  -9   5    9.43    0.63
  -1   9  -5    0.62    0.14
  -1   9  -5    0.29    0.11
   1  -9   5    0.49    0.22
  -2   9  -5   10.60    0.57
  -2   9  -5   10.80    0.55
   2  -9   5   11.09    0.69
  -3   9  -5    4.69    0.35
  -3   9  -5    4.72    0.37
   3  -9   5    3.89    0.47
  -4   9  -5    6.48    0.44
  -4   9  -5    6.28    0.47
   4  -9   5    6.05    0.56
  -5   9  -5   -0.12    0.20
  -5   9  -5    0.01    0.21
   5  -9   5   -0.03    0.32
  -6   9  -5   14.12    0.86
  -6   9  -5   14.16    0.85
   6  -9   5   13.65    0.97
  -7   9  -5   -0.06    0.32
  -7   9  -5    0.08    0.37
   6   8  -5    0.86    0.48
   6   8  -5    1.06    0.54
  -6  -8   5    0.22    0.56
  -6  -8   5   -0.32    0.38
   5   8  -5    0.61    0.42
   5   8  -5    0.33    0.38
  -5  -8   5   -0.09    0.42
  -5  -8   5    0.18    0.33
   4   8  -5    4.24    0.63
   4   8  -5    5.65    0.52
  -4  -8   5    4.04    0.50
   3   8  -5    9.46    0.59
   3   8  -5    9.52    0.70
  -3  -8   5    9.87    0.66
   2   8  -5    0.06    0.14
   2   8  -5    0.18    0.20
  -2  -8   5    0.22    0.14
   1   8  -5   -0.03    0.10
   1   8  -5    0.03    0.15
  -1  -8   5    0.32    0.17
   0   8  -5   20.20    0.85
   0   8  -5   20.53    0.93
   0  -8   5   20.62    1.01
  -1   8  -5    2.88    0.24
  -1   8  -5    2.97    0.26
   1  -8   5    2.91    0.32
  -2   8  -5   18.55    0.80
  -2   8  -5   17.53    0.79
   2  -8   5   16.78    0.90
  -3   8  -5    0.25    0.14
  -3   8  -5    0.23    0.12
   3  -8   5    0.04    0.19
  -4   8  -5    0.04    0.14
  -4   8  -5    0.10    0.14
   4  -8   5    0.29    0.23
  -5   8  -5    0.44    0.22
   5  -8   5    0.26    0.28
  -6   8  -5   16.41    0.91
  -6   8  -5   17.68    0.97
   6  -8   5   16.44    1.08
  -7   8  -5   23.12    1.24
  -7   8  -5   19.38    1.61
   6   7  -5    5.88    0.87
   6   7  -5    8.64    0.81
  -6  -7   5    6.00    0.80
  -6  -7   5    5.86    0.81
   5   7  -5   15.52    0.96
   5   7  -5   13.89    1.08
  -5  -7   5   16.40    1.08
  -5  -7   5   15.08    0.93
   4   7  -5   16.00    1.02
   4   7  -5   17.53    0.92
  -4  -7   5   16.10    0.91
   3   7  -5   17.62    0.87
   3   7  -5   19.11    1.00
  -3  -7   5   17.81    0.93
   2   7  -5   24.83    1.06
   2   7  -5   24.24    1.13
  -2  -7   5   23.74    1.11
   1   7  -5    0.92    0.17
   1   7  -5    0.85    0.14
  -1  -7   5    0.64    0.15
   0   7  -5    1.16    0.14
   0   7  -5    1.18    0.18
   0  -7   5    1.17    0.21
  -1   7  -5   68.10    2.60
  -1   7  -5   69.10    2.61
   1  -7   5   70.38    2.74
   1  -7   5   74.75    2.65
  -2   7  -5    3.03    0.24
  -2   7  -5    3.39    0.26
   2  -7   5    2.83    0.33
   2  -7   5    3.12    0.32
  -3   7  -5    0.75    0.13
  -3   7  -5    0.69    0.15
   3  -7   5    0.68    0.23
  -4   7  -5    0.32    0.14
  -4   7  -5    0.38    0.15
   4  -7   5    0.30    0.21
  -5   7  -5   -0.03    0.19
  -5   7  -5   -0.27    0.20
   5  -7   5    0.39    0.28
  -6   7  -5   -0.20    0.26
  -6   7  -5   -0.09    0.25
   6  -7   5    0.39    0.35
  -7   7  -5    1.11    0.40
  -7   7  -5    0.72    0.37
   7   6  -5    0.61    0.56
  -7  -6   5    1.04    0.50
  -7  -6   5   -0.29    0.60
   6   6  -5    0.95    0.50
   6   6  -5    0.63    0.40
  -6  -6   5    0.09    0.49
  -6  -6   5   -0.41    0.31
   5   6  -5    0.68    0.29
  -5  -6   5    0.63    0.26
   4   6  -5   97.89    3.79
   4   6  -5   99.02    3.92
  -4  -6   5  100.28    3.93
  -4  -6   5   98.98    3.77
   3   6  -5   32.94    1.53
   3   6  -5   35.34    1.45
  -3  -6   5   33.89    1.46
   2   6  -5    9.54    0.56
   2   6  -5    9.30    0.52
  -2  -6   5    9.51    0.55
   1   6  -5   48.24    1.90
   1   6  -5   48.98    1.83
  -1  -6   5   47.87    1.92
   0   6  -5    3.65    0.24
   0   6  -5    3.88    0.27
   0  -6   5    4.64    0.30
   0  -6   5    3.87    0.34
  -1   6  -5   94.64    3.59
  -1   6  -5  102.21    3.60
   1  -6   5  107.39    3.61
   1  -6   5   93.13    3.71
  -2   6  -5    1.53    0.18
  -2   6  -5    1.90    0.19
   2  -6   5    1.90    0.28
   2  -6   5    1.79    0.26
  -3   6  -5    3.77    0.30
  -3   6  -5    4.28    0.28
   3  -6   5    4.11    0.40
   3  -6   5    4.23    0.39
  -4   6  -5    1.73    0.25
  -4   6  -5    2.05    0.28
   4  -6   5    2.63    0.36
  -5   6  -5   14.11    0.72
  -5   6  -5   13.63    0.77
   5  -6   5   13.76    0.87
  -6   6  -5    7.56    0.57
  -6   6  -5    7.39    0.61
   6  -6   5    7.20    0.69
  -7   6  -5    6.58    0.69
  -7   6  -5    7.04    0.71
   7  -6   5    6.20    0.82
   7   5  -5   10.67    1.04
  -7  -5   5   10.48    0.96
  -7  -5   5   10.73    1.08
   6   5  -5    2.17    0.40
   6   5  -5    2.14    0.53
  -6  -5   5    3.36    0.56
  -6  -5   5    2.41    0.39
   5   5  -5   22.39    1.15
   5   5  -5   22.10    1.26
  -5  -5   5   20.81    1.24
  -5  -5   5   20.80    1.05
   4   5  -5    1.10    0.24
   4   5  -5    1.67    0.34
  -4  -5   5    1.27    0.32
  -4  -5   5    0.94    0.20
   3   5  -5   12.15    0.70
   3   5  -5   11.10    0.62
  -3  -5   5   10.97    0.61
   2   5  -5   97.25    3.70
   2   5  -5  105.01    3.68
   2   5  -5   96.35    3.62
  -2  -5   5   95.29    3.64
   1   5  -5  118.22    4.47
   1   5  -5  135.04    4.57
   1   5  -5  116.07    4.53
  -1  -5   5  120.77    4.55
  -1  -5   5  128.42    4.46
  -1  -5   5  129.76    4.51
   0   5  -5   30.24    1.20
   0   5  -5   23.90    1.12
   0   5  -5   28.18    1.12
   0  -5   5   29.51    1.10
   0  -5   5   29.16    1.10
  -1   5  -5    8.72    0.43
  -1   5  -5    9.14    0.42
  -1   5  -5    8.67    0.52
   1  -5   5    8.71    0.53
   1  -5   5    9.65    0.43
   1  -5   5    9.01    0.46
  -2   5  -5  100.49    3.72
  -2   5  -5   95.43    3.62
  -2   5  -5  103.76    3.58
   2  -5   5  108.33    3.62
   2  -5   5   90.38    3.72
  -3   5  -5    0.11    0.10
  -3   5  -5    0.14    0.10
   3  -5   5   -0.06    0.16
   3  -5   5   -0.18    0.14
  -4   5  -5    2.31    0.25
  -4   5  -5    2.20    0.28
   4  -5   5    2.39    0.34
   4  -5   5    2.02    0.31
  -5   5  -5    0.04    0.17
  -5   5  -5    0.07    0.19
   5  -5   5   -0.15    0.25
  -6   5  -5    5.60    0.56
  -6   5  -5    7.67    0.55
   6  -5   5    6.53    0.70
  -7   5  -5    3.02    0.42
  -7   5  -5    3.90    0.57
   7  -5   5    2.69    0.52
   7   4  -5    0.27    0.47
  -7  -4   5    0.35    0.46
  -7  -4   5    0.29    0.50
   6   4  -5    6.21    0.72
  -6  -4   5    4.81    0.71
  -6  -4   5    5.42    0.54
  -6  -4   5    5.93    0.67
   5   4  -5    2.31    0.42
   5   4  -5    1.55    0.32
  -5  -4   5    1.36    0.25
  -5  -4   5    1.76    0.41
   4   4  -5    0.34    0.22
   4   4  -5    0.16    0.17
  -4  -4   5    0.11    0.15
  -4  -4   5    0.31    0.21
   3   4  -5   55.23    2.18
   3   4  -5   55.82    2.27
   3   4  -5   55.91    2.16
  -3  -4   5   54.07    2.13
  -3  -4   5   56.30    2.16
  -3  -4   5   54.63    2.26
   2   4  -5  102.37    4.04
   2   4  -5  104.68    4.11
   2   4  -5  116.28    4.06
  -2  -4   5  111.00    4.07
  -2  -4   5  120.30    4.08
   1   4  -5    3.03    0.27
   1   4  -5    3.31    0.28
   1   4  -5    3.33    0.26
  -1  -4   5    3.54    0.27
  -1  -4   5    3.17    0.22
  -1  -4   5    3.39    0.28
   0   4  -5    0.06    0.07
   0   4  -5    0.03    0.07
   0   4  -5    0.00    0.12
   0  -4   5    0.02    0.08
   0  -4   5    0.03    0.10
  -1   4  -5   96.25    3.61
  -1   4  -5  100.83    3.64
  -1   4  -5  104.98    3.75
   1  -4   5  101.43    3.76
   1  -4   5  104.26    3.62
   1  -4   5  101.47    3.66
  -2   4  -5    6.90    0.48
  -2   4  -5    6.25    0.35
  -2   4  -5    6.49    0.31
   2  -4   5    6.07    0.44
   2  -4   5    6.61    0.34
   2  -4   5    6.29    0.40
  -3   4  -5  282.08    9.68
  -3   4  -5  257.41    9.74
   3  -4   5  261.17    9.86
   3  -4   5  298.22    9.74
  -4   4  -5    0.04    0.14
  -4   4  -5   -0.09    0.16
   4  -4   5   -0.22    0.17
   4  -4   5   -0.01    0.22
  -5   4  -5    0.37    0.19
  -5   4  -5    0.65    0.21
   5  -4   5    0.34    0.27
  -6   4  -5    3.98    0.45
  -6   4  -5    3.78    0.43
   6  -4   5    3.25    0.49
  -7   4  -5    2.85    0.56
  -7   4  -5    2.58    0.40
   7  -4   5    1.87    0.46
   7   3  -5   -0.37    0.47
  -7  -3   5   -0.28    0.50
  -7  -3   5    0.52    0.41
   6   3  -5    3.12    0.49
  -6  -3   5    2.18    0.50
  -6  -3   5    2.47    0.42
  -6  -3   5    1.93    0.29
   5   3  -5   48.32    2.04
  -5  -3   5   46.58    2.11
  -5  -3   5   45.36    1.85
   4   3  -5   44.37    1.88
   4   3  -5   44.73    1.96
  -4  -3   5   46.42    1.82
  -4  -3   5   44.85    1.96
  -4  -3   5   44.73    1.77
   3   3  -5   61.13    2.50
   3   3  -5   61.09    2.42
   3   3  -5   65.07    2.37
  -3  -3   5   62.72    2.34
  -3  -3   5   63.14    2.36
  -3  -3   5   60.90    2.50
   2   3  -5  108.32    4.10
   2   3  -5  116.40    4.02
   2   3  -5  102.48    4.02
  -2  -3   5  113.76    4.01
  -2  -3   5  114.49    4.00
  -2  -3   5  108.28    4.10
   1   3  -5    0.17    0.09
   1   3  -5    0.15    0.09
   1   3  -5    0.12    0.06
  -1  -3   5    0.17    0.08
  -1  -3   5    0.05    0.08
  -1  -3   5    0.26    0.09
   0   3  -5   43.03    1.61
   0   3  -5   42.80    1.62
   0   3  -5   44.94    1.69
   0  -3   5   43.20    1.60
   0  -3   5   43.44    1.70
   0  -3   5   44.63    1.61
  -1   3  -5   24.23    1.05
  -1   3  -5   24.69    0.95
  -1   3  -5   23.21    0.90
   1  -3   5   24.40    0.90
   1  -3   5   24.97    0.96
  -2   3  -5   46.72    1.82
  -2   3  -5   41.27    1.70
  -2   3  -5   45.64    1.62
   2  -3   5   47.41    1.73
   2  -3   5   45.33    1.65
   2  -3   5   43.00    1.81
  -3   3  -5   72.14    2.79
  -3   3  -5   78.34    2.73
   3  -3   5   70.53    2.91
   3  -3   5   79.76    2.77
  -4   3  -5   52.82    2.15
  -4   3  -5   56.72    2.14
  -4   3  -5   56.51    2.10
   4  -3   5   56.47    2.14
   4  -3   5   53.78    2.27
  -5   3  -5    7.50    0.50
  -5   3  -5    8.06    0.53
   5  -3   5    8.57    0.67
  -6   3  -5    5.55    0.53
  -6   3  -5    3.89    0.51
   6  -3   5    6.28    0.67
  -7   3  -5    4.42    0.54
   7  -3   5    2.67    0.54
   7   2  -5   12.44    0.98
  -7  -2   5   10.74    1.09
  -7  -2   5   11.74    0.95
   6   2  -5    3.33    0.48
  -6  -2   5    3.04    0.45
  -6  -2   5    2.93    0.37
  -6  -2   5    3.99    0.59
   5   2  -5   21.37    1.10
  -5  -2   5   20.96    1.20
  -5  -2   5   21.78    1.02
  -5  -2   5   20.31    0.92
   4   2  -5    7.52    0.53
  -4  -2   5    7.51    0.61
  -4  -2   5    7.28    0.48
  -4  -2   5    7.99    0.43
   3   2  -5    1.30    0.19
   3   2  -5    1.58    0.24
   3   2  -5    1.93    0.27
  -3  -2   5    1.50    0.19
  -3  -2   5    1.59    0.19
  -3  -2   5    1.15    0.23
   2   2  -5    9.67    0.52
   2   2  -5   11.32    0.51
   2   2  -5    9.99    0.59
  -2  -2   5   11.13    0.54
  -2  -2   5   10.89    0.51
  -2  -2   5   10.54    0.62
  -2  -2   5   11.45    0.58
   1   2  -5   11.39    0.49
   1   2  -5   10.20    0.51
   1   2  -5   10.13    0.47
  -1  -2   5    9.61    0.51
  -1  -2   5   10.80    0.49
  -1  -2   5   10.54    0.46
  -1  -2   5    9.75    0.49
   0   2  -5  119.31    4.03
   0   2  -5  105.67    3.93
   0   2  -5  107.32    3.94
   0  -2   5  111.61    3.93
   0  -2   5  108.75    4.02
   0  -2   5  111.70    3.93
  -1   2  -5   33.12    1.22
  -1   2  -5   34.31    1.39
  -1   2  -5   33.43    1.27
   1  -2   5   34.44    1.40
   1  -2   5   35.14    1.29
   1  -2   5   34.41    1.22
  -2   2  -5   43.57    1.51
  -2   2  -5   43.56    1.72
  -2   2  -5   41.55    1.59
   2  -2   5   43.31    1.62
   2  -2   5   38.30    1.72
  -3   2  -5  187.79    6.47
  -3   2  -5  186.93    6.48
  -3   2  -5  169.75    6.53
   3  -2   5  181.45    6.69
   3  -2   5  188.92    6.49
  -4   2  -5   15.78    0.79
  -4   2  -5   17.76    0.79
  -4   2  -5   18.31    0.79
   4  -2   5   16.43    0.93
  -5   2  -5   13.48    0.73
  -5   2  -5   12.68    0.69
  -5   2  -5   12.19    0.79
   5  -2   5   13.25    0.83
  -6   2  -5    1.58    0.32
  -6   2  -5    1.82    0.32
   6  -2   5    1.47    0.40
  -7   2  -5    9.72    0.76
   8   1  -5    2.50    0.64
  -8  -1   5    1.81    0.65
  -8  -1   5    1.36    0.58
   7   1  -5    0.97    0.42
  -7  -1   5    0.45    0.42
  -7  -1   5    0.91    0.48
   6   1  -5    7.26    0.71
  -6  -1   5    6.60    0.66
  -6  -1   5    6.78    0.47
   5   1  -5    0.64    0.28
  -5  -1   5    0.99    0.28
  -5  -1   5    1.09    0.24
  -5  -1   5    0.28    0.23
  -5  -1   5    0.59    0.16
   4   1  -5   18.79    0.97
  -4  -1   5   17.98    1.01
  -4  -1   5   21.04    0.85
  -4  -1   5   20.29    0.81
   3   1  -5   22.09    1.09
   3   1  -5   26.31    1.00
  -3  -1   5   26.08    1.00
  -3  -1   5   24.01    1.16
  -3  -1   5   27.20    1.00
   2   1  -5   94.72    3.32
   2   1  -5   95.97    3.45
  -2  -1   5   88.53    3.32
  -2  -1   5   96.04    3.38
  -2  -1   5   88.99    3.47
  -2  -1   5   91.31    3.44
   1   1  -5  109.19    4.02
   1   1  -5  112.67    4.01
   1   1  -5  115.78    4.06
  -1  -1   5  113.72    4.00
  -1  -1   5  113.05    4.05
  -1  -1   5  111.32    4.06
  -1  -1   5  109.47    4.02
   0   1  -5   96.15    3.51
   0   1  -5  103.58    3.62
   0  -1   5   99.03    3.53
   0  -1   5   98.21    3.51
   0  -1   5  100.99    3.62
   0  -1   5   96.82    3.52
  -1   1  -5    6.24    0.29
  -1   1  -5    5.95    0.41
   1  -1   5    6.11    0.39
   1  -1   5    6.05    0.30
  -2   1  -5    3.71    0.16
  -2   1  -5    3.56    0.23
  -2   1  -5    3.23    0.37
  -2   1  -5    3.63    0.17
   2  -1   5    3.80    0.27
   2  -1   5    3.29    0.33
  -3   1  -5   12.95    0.55
  -3   1  -5   12.69    0.54
  -3   1  -5   11.21    0.57
  -3   1  -5   12.42    0.65
   3  -1   5   12.50    0.64
   3  -1   5   12.05    0.71
  -4   1  -5   14.73    0.70
  -4   1  -5   14.44    0.71
  -4   1  -5   15.26    0.69
   4  -1   5   14.20    0.85
  -5   1  -5   11.54    0.67
  -5   1  -5   12.31    0.83
  -5   1  -5   12.16    0.66
   5  -1   5   11.23    0.78
  -6   1  -5    9.81    0.71
  -6   1  -5   10.06    0.69
   6  -1   5   10.23    0.82
  -7   1  -5   19.13    1.07
   7  -1   5   18.56    1.23
   8   0  -5    1.82    0.60
  -8   0   5    0.93    0.65
  -8   0   5    0.78    0.55
   7   0  -5   20.55    1.26
  -7   0   5   20.22    1.27
  -7   0   5   20.35    1.26
   6   0  -5    1.15    0.35
  -6   0   5    0.57    0.32
  -6   0   5    0.85    0.46
   5   0  -5    0.40    0.24
  -5   0   5    0.60    0.29
  -5   0   5    0.86    0.19
  -5   0   5    0.92    0.14
  -5   0   5    0.48    0.23
   4   0  -5    8.38    0.59
  -4   0   5    8.92    0.39
  -4   0   5    9.72    0.43
  -4   0   5    7.78    0.60
   3   0  -5    4.36    0.36
  -3   0   5    4.56    0.23
  -3   0   5    4.36    0.25
  -3   0   5    4.85    0.41
   2   0  -5   27.78    1.03
   2   0  -5   28.07    1.15
   2   0  -5   28.17    1.20
  -2   0   5   28.08    1.20
  -2   0   5   27.90    1.12
  -2   0   5   27.00    1.21
  -2   0   5   28.01    1.05
   1   0  -5   40.04    1.52
   1   0  -5   36.26    1.47
   1   0  -5   39.81    1.48
  -1   0   5   40.19    1.49
  -1   0   5   38.58    1.52
  -1   0   5   39.65    1.46
  -1   0   5   39.83    1.53
   0   0  -5   43.58    1.64
   0   0  -5   42.79    1.56
   0   0  -5   41.24    1.53
   0   0   5   41.87    1.64
   0   0   5   41.37    1.52
   0   0   5   42.03    1.55
  -1   0  -5   38.23    1.40
  -1   0  -5   37.99    1.37
   1   0   5   39.71    1.42
   1   0   5   37.98    1.56
  -2   0  -5   51.78    1.87
  -2   0  -5   52.96    1.91
  -2   0  -5   52.51    2.09
   2   0   5   51.83    1.88
   2   0   5   52.92    1.94
   2   0   5   50.30    2.09
  -3   0  -5   11.80    0.49
  -3   0  -5   11.54    0.53
  -3   0  -5   10.86    0.61
  -3   0  -5   10.51    0.52
   3   0   5   11.38    0.60
   3   0   5   10.58    0.68
  -4   0  -5    1.01    0.19
  -4   0  -5    1.36    0.22
  -4   0  -5    1.35    0.20
   4   0   5    1.43    0.30
  -5   0  -5    1.80    0.28
  -5   0  -5    2.11    0.29
   5   0   5    1.67    0.34
  -6   0  -5    2.50    0.37
  -6   0  -5    2.27    0.37
   6   0   5    2.51    0.45
  -7   0  -5    0.24    0.35
  -7   0  -5    0.62    0.49
   7   0   5   -0.41    0.46
  -8   1   5    3.39    0.57
  -8   1   5    4.54    0.75
   7  -1  -5   16.73    1.05
  -7   1   5   14.24    1.01
  -7   1   5   15.07    1.16
   6  -1  -5   11.13    0.86
  -6   1   5   10.97    0.98
  -6   1   5   11.04    0.84
   5  -1  -5    5.56    0.55
  -5   1   5    5.01    0.53
  -5   1   5    5.60    0.55
   4  -1  -5   28.20    1.31
  -4   1   5   29.90    1.38
  -4   1   5   29.10    1.31
   3  -1  -5   15.16    0.76
  -3   1   5   14.88    0.80
   2  -1  -5  421.55   14.60
   2  -1  -5  368.70   14.47
   2  -1  -5  444.39   14.67
  -2   1   5  435.65   14.58
  -2   1   5  402.76   14.47
   1  -1  -5    6.70    0.39
   1  -1  -5    6.19    0.33
   1  -1  -5    6.23    0.39
  -1   1   5    6.63    0.32
  -1   1   5    5.88    0.33
  -1   1   5    6.48    0.37
   0  -1  -5   22.03    0.88
   0  -1  -5   21.96    0.83
   0  -1  -5   23.57    0.96
   0   1   5   21.19    0.86
   0   1   5   21.99    0.82
   0   1   5   22.71    0.96
  -1  -1  -5  241.97    8.30
  -1  -1  -5  219.69    8.09
  -1  -1  -5  232.59    8.11
   1   1   5  223.09    8.09
   1   1   5  232.34    8.11
   1   1   5  238.64    8.30
  -2  -1  -5   36.72    1.37
  -2  -1  -5   36.29    1.30
  -2  -1  -5   37.08    1.33
   2   1   5   31.79    1.50
   2   1   5   36.23    1.36
   2   1   5   34.90    1.33
  -3  -1  -5    0.89    0.20
  -3  -1  -5    0.81    0.12
  -3  -1  -5    0.83    0.15
  -3  -1  -5    0.60    0.15
   3   1   5    0.66    0.19
   3   1   5    0.76    0.16
   3   1   5    0.64    0.21
  -4  -1  -5   22.57    1.01
  -4  -1  -5   24.41    0.97
  -4  -1  -5   24.19    1.05
   4   1   5   22.37    1.19
  -5  -1  -5    5.98    0.50
  -5  -1  -5    5.62    0.46
   5   1   5    6.18    0.62
  -6  -1  -5    0.51    0.29
  -6  -1  -5   -0.33    0.32
   6   1   5    0.40    0.38
  -7  -1  -5    7.12    0.97
  -7  -1  -5    6.82    0.71
   7   1   5    7.30    0.89
  -8   2   5    1.05    0.50
  -8   2   5    1.58    0.59
   7  -2  -5    4.15    0.60
  -7   2   5    4.22    0.58
  -7   2   5    5.40    0.71
   6  -2  -5    8.74    0.75
  -6   2   5    9.92    0.75
   5  -2  -5   17.30    0.94
  -5   2   5   14.94    0.96
  -5   2   5   14.72    0.88
   4  -2  -5   16.05    0.83
  -4   2   5   15.14    0.81
  -4   2   5   16.06    0.90
   3  -2  -5    0.27    0.14
  -3   2   5    0.37    0.16
  -3   2   5    0.18    0.16
   2  -2  -5  114.25    3.95
   2  -2  -5  112.62    4.07
   2  -2  -5  102.62    4.03
   2  -2  -5  112.04    4.13
  -2   2   5  114.00    3.95
  -2   2   5  118.03    4.05
  -2   2   5  106.79    4.11
   1  -2  -5   29.23    1.16
   1  -2  -5   28.58    1.19
   1  -2  -5   28.52    1.13
  -1   2   5   29.83    1.18
  -1   2   5   28.83    1.15
  -1   2   5   30.05    1.11
   0  -2  -5   41.24    1.53
   0  -2  -5   41.12    1.60
   0  -2  -5   39.26    1.45
   0   2   5   39.94    1.43
   0   2   5   39.70    1.50
   0   2   5   40.40    1.60
  -1  -2  -5    2.65    0.18
  -1  -2  -5    2.34    0.11
  -1  -2  -5    2.20    0.33
   1   2   5    2.21    0.15
   1   2   5    1.60    0.23
  -2  -2  -5   13.71    0.56
  -2  -2  -5   13.70    0.60
  -2  -2  -5   13.40    0.57
   2   2   5   14.41    0.61
   2   2   5   14.84    0.61
  -3  -2  -5    3.54    0.34
  -3  -2  -5    3.84    0.28
  -3  -2  -5    3.94    0.26
   3   2   5    3.20    0.39
   3   2   5    4.09    0.34
  -4  -2  -5   46.93    1.94
  -4  -2  -5   50.09    1.86
  -4  -2  -5   48.53    1.90
   4   2   5   49.13    1.95
   4   2   5   50.76    2.15
  -5  -2  -5    2.16    0.30
  -5  -2  -5    1.92    0.33
   5   2   5    2.13    0.42
  -6  -2  -5    1.77    0.37
  -6  -2  -5    1.01    0.45
  -6  -2  -5    1.37    0.31
   6   2   5    1.07    0.44
  -7  -2  -5   18.34    1.32
  -7  -2  -5   17.09    1.04
   7   2   5   19.55    1.33
  -8   3   5   -0.25    0.57
  -8   3   5   -0.47    0.52
  -7   3   5    3.37    0.53
  -7   3   5    3.79    0.57
   6  -3  -5    3.85    0.53
  -6   3   5    4.47    0.54
  -6   3   5    4.19    0.58
   5  -3  -5   82.45    3.29
  -5   3   5   84.33    3.35
  -5   3   5   81.69    3.27
   4  -3  -5    9.81    0.62
  -4   3   5    8.92    0.63
  -4   3   5    8.69    0.60
   3  -3  -5    3.38    0.32
  -3   3   5    4.04    0.34
  -3   3   5    3.31    0.36
   2  -3  -5  161.83    5.64
   2  -3  -5  158.60    5.73
   2  -3  -5  160.31    5.65
   2  -3  -5  154.69    5.82
  -2   3   5  165.60    5.72
  -2   3   5  162.97    5.73
  -2   3   5  151.72    5.78
   1  -3  -5   67.97    2.53
   1  -3  -5   68.19    2.56
   1  -3  -5   67.93    2.53
   1  -3  -5   68.69    2.48
  -1   3   5   65.76    2.51
  -1   3   5   69.69    2.46
  -1   3   5   66.23    2.53
  -1   3   5   68.36    2.47
   0  -3  -5   62.39    2.35
   0  -3  -5   65.89    2.45
   0  -3  -5   64.16    2.24
   0   3   5   61.71    2.22
   0   3   5   66.20    2.24
   0   3   5   61.03    2.32
   0   3   5   62.04    2.42
  -1  -3  -5   66.85    2.58
  -1  -3  -5   64.10    2.26
   1   3   5   54.11    2.39
   1   3   5   61.11    2.24
  -2  -3  -5    0.52    0.11
  -2  -3  -5    0.29    0.10
  -2  -3  -5    0.47    0.08
   2   3   5    0.38    0.12
   2   3   5    0.21    0.15
  -3  -3  -5   15.17    0.66
  -3  -3  -5   15.67    0.71
  -3  -3  -5   15.58    0.66
   3   3   5   14.01    0.87
   3   3   5   14.95    0.74
  -4  -3  -5  138.42    5.27
  -4  -3  -5  142.31    5.19
   4   3   5  147.35    5.49
   4   3   5  147.68    5.29
  -5  -3  -5    0.22    0.19
  -5  -3  -5    0.77    0.34
  -5  -3  -5    0.44    0.28
   5   3   5    0.77    0.29
   5   3   5   -0.16    0.30
  -6  -3  -5    5.32    0.53
  -6  -3  -5    4.81    0.76
  -6  -3  -5    4.53    0.54
   6   3   5    3.66    0.59
  -7  -3  -5   12.52    1.11
   7   3   5   11.00    1.10
  -8   4   5    0.12    0.57
  -8   4   5   -0.49    0.55
  -7   4   5    0.00    0.42
  -7   4   5   -0.73    0.41
  -6   4   5   -0.46    0.34
  -6   4   5   -0.13    0.33
   5  -4  -5    0.50    0.28
  -5   4   5   -0.01    0.24
  -5   4   5   -0.51    0.26
   4  -4  -5    6.00    0.50
  -4   4   5    6.65    0.51
  -4   4   5    6.22    0.50
   3  -4  -5   -0.01    0.14
  -3   4   5   -0.01    0.15
  -3   4   5    0.02    0.14
   2  -4  -5    5.66    0.36
   2  -4  -5    5.23    0.31
   2  -4  -5    5.34    0.33
  -2   4   5    4.59    0.37
  -2   4   5    4.92    0.34
  -2   4   5    4.34    0.38
   1  -4  -5  162.86    5.82
   1  -4  -5  163.19    5.84
   1  -4  -5  161.70    5.72
   1  -4  -5  163.09    5.81
  -1   4   5  165.67    5.72
  -1   4   5  162.30    5.80
  -1   4   5  149.51    5.79
  -1   4   5  163.24    5.72
   0  -4  -5    0.01    0.13
   0  -4  -5    0.16    0.12
   0  -4  -5   -0.02    0.18
   0   4   5   -0.15    0.11
   0   4   5   -0.04    0.08
  -1  -4  -5   22.98    1.15
  -1  -4  -5   26.25    1.03
   1   4   5   24.30    1.14
   1   4   5   25.96    1.00
  -2  -4  -5   60.25    2.01
  -2  -4  -5   52.85    2.30
  -2  -4  -5   56.00    2.09
  -2  -4  -5   57.02    1.99
   2   4   5   53.59    2.29
  -3  -4  -5    1.02    0.18
  -3  -4  -5    0.66    0.23
  -3  -4  -5    0.84    0.14
  -3  -4  -5    0.98    0.19
   3   4   5    0.93    0.18
   3   4   5    0.39    0.23
  -4  -4  -5    0.83    0.17
  -4  -4  -5    1.05    0.34
  -4  -4  -5    0.67    0.27
   4   4   5    0.52    0.31
   4   4   5    0.63    0.25
  -5  -4  -5   34.92    1.48
  -5  -4  -5   35.52    1.79
  -5  -4  -5   35.68    1.61
   5   4   5   35.96    1.77
   5   4   5   36.66    1.62
  -6  -4  -5   -0.48    0.56
  -6  -4  -5    0.64    0.31
  -6  -4  -5    0.31    0.43
   6   4   5   -0.24    0.46
  -7   5   5   -0.65    0.44
  -6   5   5    3.75    0.54
  -6   5   5    3.50    0.49
  -5   5   5    5.02    0.51
  -5   5   5    4.62    0.53
  -4   5   5    4.04    0.43
  -4   5   5    4.01    0.42
   3  -5  -5   17.38    0.69
   3  -5  -5   16.81    0.66
  -3   5   5   15.56    0.85
  -3   5   5   15.99    0.80
   2  -5  -5    9.57    0.48
   2  -5  -5    9.70    0.53
  -2   5   5    9.73    0.54
  -2   5   5   10.04    0.51
  -2   5   5    8.53    0.55
   1  -5  -5    2.35    0.35
   1  -5  -5    2.54    0.32
  -1   5   5    2.12    0.25
  -1   5   5    2.81    0.23
  -1   5   5    2.75    0.34
  -1   5   5    2.64    0.20
   0  -5  -5    5.56    0.43
   0  -5  -5    6.65    0.45
   0   5   5    6.14    0.36
   0   5   5    6.76    0.46
  -1  -5  -5   85.45    3.08
  -1  -5  -5   83.70    3.25
   1   5   5   81.36    3.05
   1   5   5   82.71    3.23
  -2  -5  -5    0.05    0.20
   2   5   5    0.13    0.12
   2   5   5   -0.16    0.18
  -3  -5  -5   26.26    1.35
  -3  -5  -5   26.39    1.01
  -3  -5  -5   27.72    1.01
   3   5   5   25.16    1.15
   3   5   5   24.73    1.32
  -4  -5  -5    1.31    0.38
  -4  -5  -5    1.43    0.20
   4   5   5    1.50    0.30
   4   5   5    1.32    0.38
  -5  -5  -5    3.59    0.58
  -5  -5  -5    4.84    0.64
  -5  -5  -5    4.03    0.41
   5   5   5    3.51    0.62
   5   5   5    4.00    0.50
  -6  -5  -5    2.02    0.49
   6   5   5    0.42    0.49
  -7   6   5    1.22    0.45
  -7   6   5    0.11    0.46
  -6   6   5    9.66    0.80
  -6   6   5    9.02    0.80
  -5   6   5    2.00    0.33
  -5   6   5    1.43    0.33
  -4   6   5    6.83    0.54
  -4   6   5    6.83    0.59
   3  -6  -5   32.52    1.25
   3  -6  -5   33.35    1.29
  -3   6   5   32.26    1.45
  -3   6   5   31.59    1.36
   2  -6  -5    6.77    0.42
   2  -6  -5    6.63    0.48
  -2   6   5    6.76    0.47
  -2   6   5    7.17    0.43
  -2   6   5    6.26    0.44
   1  -6  -5    0.28    0.14
   1  -6  -5    0.11    0.24
  -1   6   5    0.31    0.13
  -1   6   5    0.23    0.09
  -1   6   5    0.00    0.11
   0  -6  -5    2.29    0.30
   0   6   5    1.64    0.20
   0   6   5    1.30    0.23
  -1  -6  -5   19.41    1.00
   1   6   5   19.00    0.99
   1   6   5   18.19    0.82
  -2  -6  -5    0.66    0.23
   2   6   5    0.96    0.26
   2   6   5    0.93    0.18
  -3  -6  -5   10.26    0.77
  -3  -6  -5    9.93    0.43
   3   6   5    9.57    0.63
   3   6   5   10.17    0.79
  -4  -6  -5   -0.62    0.35
   4   6   5   -0.20    0.29
   4   6   5   -0.64    0.32
  -5  -6  -5   12.28    0.90
  -5  -6  -5   13.44    1.01
   5   6   5   11.54    0.94
   5   6   5   12.42    0.97
  -6  -6  -5    2.00    0.57
   6   6   5    1.17    0.57
  -7   7   5    0.65    0.50
  -7   7   5    1.44    0.49
  -6   7   5    4.79    0.65
  -6   7   5    4.08    0.55
  -5   7   5    1.01    0.31
  -5   7   5    1.25    0.35
   4  -7  -5    3.64    0.27
  -4   7   5    3.12    0.42
  -4   7   5    2.91    0.40
   3  -7  -5    0.66    0.17
   3  -7  -5    0.73    0.24
  -3   7   5    0.54    0.19
  -3   7   5    0.68    0.22
   2  -7  -5   18.89    0.92
   2  -7  -5   18.27    0.85
  -2   7   5   17.19    0.85
  -2   7   5   19.28    0.87
  -2   7   5   18.17    0.90
   1  -7  -5    6.29    0.50
  -1   7   5    6.30    0.43
  -1   7   5    6.77    0.32
  -1   7   5    7.30    0.38
   0  -7  -5   27.41    1.26
   0   7   5   25.58    1.12
  -1  -7  -5   30.18    1.41
   1   7   5   29.25    1.23
   1   7   5   29.38    1.39
  -2  -7  -5   12.70    0.81
   2   7   5   12.46    0.67
   2   7   5   11.44    0.79
  -3  -7  -5    5.10    0.56
   3   7   5    4.63    0.46
   3   7   5    4.06    0.51
  -4  -7  -5    7.02    0.70
   4   7   5    7.22    0.66
   4   7   5    7.64    0.72
  -5  -7  -5    0.40    0.47
   5   7   5   -0.15    0.44
   5   7   5    0.67    0.46
  -7   8   5    0.30    0.46
  -7   8   5    0.68    0.46
  -6   8   5    5.11    0.65
  -6   8   5    4.99    0.66
  -5   8   5    3.37    0.50
  -5   8   5    2.59    0.36
   4  -8  -5    8.68    0.48
  -4   8   5    8.75    0.66
  -4   8   5    8.29    0.59
   3  -8  -5   14.55    0.77
   3  -8  -5   13.68    0.68
  -3   8   5   13.36    0.77
  -3   8   5   12.94    0.70
   2  -8  -5    3.13    0.35
  -2   8   5    3.10    0.41
  -2   8   5    2.90    0.36
  -2   8   5    2.95    0.27
   1  -8  -5    7.85    0.58
  -1   8   5    8.36    0.50
  -1   8   5    8.86    0.46
  -1   8   5    8.41    0.38
   0  -8  -5    1.78    0.31
   0   8   5    2.06    0.28
  -1  -8  -5   12.58    0.80
   1   8   5   12.18    0.65
  -2  -8  -5    9.29    0.76
   2   8   5    8.92    0.60
  -3  -8  -5    1.84    0.45
   3   8   5    2.58    0.38
  -4  -8  -5   13.46    1.09
   4   8   5   16.20    1.02
  -5  -8  -5    0.95    0.52
   5   8   5    0.87    0.53
  -7   9   5    2.08    0.53
  -7   9   5    3.05    0.59
  -6   9   5    3.85    0.52
  -6   9   5    3.87    0.57
  -5   9   5    1.83    0.38
  -5   9   5    1.72    0.36
  -4   9   5    0.17    0.23
  -4   9   5    0.01    0.26
   3  -9  -5   -0.18    0.19
  -3   9   5    0.02    0.23
  -3   9   5    0.05    0.18
   2  -9  -5   47.35    1.98
  -2   9   5   50.35    1.85
  -2   9   5   48.75    2.02
   1  -9  -5   16.81    0.91
  -1   9   5   16.42    0.84
  -1   9   5   17.21    0.66
   0  -9  -5   28.58    1.37
   0   9   5   26.88    1.21
  -1  -9  -5    4.82    0.62
   1   9   5    5.33    0.44
  -2  -9  -5    7.93    0.68
   2   9   5    6.84    0.58
  -3  -9  -5    1.11    0.35
   3   9   5    1.51    0.34
  -4  -9  -5    2.93    0.51
   4   9   5    3.37    0.52
  -5  -9  -5    2.11    0.67
  -6  10   5    1.04    0.48
  -6  10   5    1.86    0.44
  -5  10   5    5.87    0.58
  -5  10   5    5.63    0.70
  -4  10   5    0.38    0.25
  -4  10   5    0.87    0.33
   3 -10  -5   22.71    1.11
  -3  10   5   23.62    1.05
  -3  10   5   25.50    1.21
   2 -10  -5    6.62    0.55
  -2  10   5    6.05    0.52
  -2  10   5    5.87    0.37
   1 -10  -5   -0.09    0.27
  -1  10   5   -0.11    0.19
   0 -10  -5    2.05    0.37
   0  10   5    1.93    0.30
  -1 -10  -5    0.22    0.36
   1  10   5    0.45    0.23
  -2 -10  -5    1.46    0.45
   2  10   5    1.75    0.32
  -3 -10  -5   -0.70    0.39
   3  10   5   -0.73    0.34
  -4 -10  -5    1.59    0.62
   4  10   5    3.54    0.56
  -6  11   5   -0.34    0.46
  -6  11   5    0.51    0.46
  -5  11   5   10.31    0.83
  -5  11   5   10.98    0.78
  -4  11   5   10.75    0.69
  -4  11   5   10.55    0.82
   3 -11  -5    2.53    0.36
  -3  11   5    1.95    0.33
  -3  11   5    2.30    0.28
   2 -11  -5    0.07    0.28
  -2  11   5    0.11    0.22
   1 -11  -5    1.89    0.41
  -1  11   5    2.13    0.33
   0  11   5   11.79    0.74
  -1 -11  -5   18.19    1.13
   1  11   5   18.88    1.00
  -2 -11  -5    3.53    0.53
   2  11   5    3.04    0.44
  -3 -11  -5    0.98    0.55
   3  11   5    0.87    0.44
  -5  12   5    0.75    0.39
  -5  12   5    0.79    0.46
  -4  12   5    0.10    0.39
  -4  12   5   -0.16    0.35
   3 -12  -5   12.94    0.87
  -3  12   5   14.60    0.91
   2 -12  -5    0.88    0.37
  -2  12   5    0.81    0.28
   1 -12  -5    9.36    0.97
  -1  12   5   10.73    0.72
   0 -12  -5   -0.39    0.37
   0  12   5    0.14    0.26
  -1 -12  -5   34.63    1.80
   1  12   5   35.04    1.62
  -2 -12  -5    5.01    0.69
   2  12   5    4.57    0.67
  -3 -12  -5    0.52    0.54
   3  12   5    0.90    0.51
  -4  13   5    5.86    0.65
  -3  13   5    0.33    0.36
   2 -13  -5    1.40    0.43
  -2  13   5    0.93    0.36
   1 -13  -5    6.28    0.82
  -1  13   5    7.15    0.67
   0 -13  -5   -0.05    0.43
   0  13   5    0.16    0.33
  -1 -13  -5    1.98    0.56
   1  13   5    2.78    0.48
  -2 -13  -5    0.33    0.49
   2  13   5   -0.49    0.44
  -3  14   5   -0.11    0.42
   2 -14  -5    1.47    0.48
  -2  14   5    0.52    0.40
   1 -14  -5    8.12    0.99
  -1  14   5    8.14    0.74
   0 -14  -5   -0.32    0.54
   0  14   5    0.71    0.39
   1  16  -6   -0.27    0.46
  -1 -16   6   -0.38    0.57
   0  16  -6    7.05    0.86
   0  16  -6    6.58    0.64
   0 -16   6    9.05    0.89
  -1  16  -6    3.95    0.60
  -1  16  -6    3.50    0.47
   1 -16   6    4.40    0.69
  -2  16  -6    2.56    0.36
  -2  16  -6    3.59    0.52
   2 -16   6    2.58    0.55
  -3  16  -6   10.69    0.84
  -3  16  -6    9.35    0.71
   3 -16   6   10.25    1.04
   2  15  -6    2.50    0.68
   2  15  -6    2.29    0.49
  -2 -15   6    2.13    0.56
   1  15  -6    0.58    0.47
   1  15  -6    1.07    0.33
  -1 -15   6    1.18    0.52
   0  15  -6    2.09    0.32
   0  15  -6    2.01    0.44
   0 -15   6    1.70    0.49
  -1  15  -6    1.38    0.41
  -1  15  -6    0.80    0.25
   1 -15   6    0.83    0.42
  -2  15  -6   -0.02    0.25
  -2  15  -6    0.46    0.33
   2 -15   6    1.07    0.46
  -3  15  -6    0.90    0.29
  -3  15  -6    1.48    0.34
   3 -15   6    1.55    0.48
  -4  15  -6   -0.06    0.34
  -4  15  -6   -0.52    0.30
   4 -15   6    0.12    0.50
   3  14  -6    1.21    0.42
   3  14  -6    0.63    0.55
  -3 -14   6    0.01    0.50
   2  14  -6    0.05    0.44
   2  14  -6    0.11    0.39
  -2 -14   6    0.29    0.38
   1  14  -6   25.24    1.20
   1  14  -6   25.51    1.36
  -1 -14   6   27.38    1.49
   0  14  -6    2.17    0.41
   0  14  -6    3.06    0.38
   0 -14   6    2.41    0.48
  -1  14  -6    0.93    0.34
  -1  14  -6    1.05    0.25
   1 -14   6    1.31    0.39
  -2  14  -6    1.31    0.27
  -2  14  -6    1.38    0.31
   2 -14   6    1.87    0.41
  -3  14  -6    8.03    0.58
  -3  14  -6    8.92    0.68
   3 -14   6    8.73    0.84
  -4  14  -6    0.28    0.29
  -4  14  -6    0.59    0.29
   4 -14   6    1.28    0.50
  -5  14  -6    0.42    0.34
  -5  14  -6   -0.18    0.31
   5 -14   6    0.90    0.56
   4  13  -6    5.79    0.79
   4  13  -6    5.90    0.85
  -4 -13   6    4.31    0.65
   3  13  -6   46.79    2.22
   3  13  -6   43.36    1.96
  -3 -13   6   44.82    2.18
   2  13  -6    0.33    0.31
   2  13  -6    1.06    0.36
  -2 -13   6    0.92    0.34
   1  13  -6   14.89    0.93
   1  13  -6   13.60    0.75
  -1 -13   6   13.30    0.96
   0  13  -6   14.34    0.90
   0  13  -6   13.22    0.71
   0 -13   6   13.05    0.93
  -1  13  -6    3.71    0.46
  -1  13  -6    2.71    0.35
   1 -13   6    4.00    0.58
  -2  13  -6    8.00    0.67
  -2  13  -6    8.53    0.54
   2 -13   6    8.47    0.78
  -3  13  -6    3.60    0.43
  -3  13  -6    2.83    0.35
   3 -13   6    2.77    0.49
  -4  13  -6    0.20    0.26
  -4  13  -6   -0.07    0.25
   4 -13   6    0.42    0.43
  -5  13  -6    3.44    0.45
  -5  13  -6    2.97    0.45
   5 -13   6    3.92    0.63
  -6  13  -6    1.11    0.40
  -6  13  -6    2.32    0.44
   4  12  -6    2.29    0.48
   4  12  -6    1.44    0.50
  -4 -12   6    2.95    0.54
   3  12  -6   83.02    3.44
   3  12  -6   78.64    3.20
  -3 -12   6   83.37    3.42
   2  12  -6    0.86    0.28
   2  12  -6    0.83    0.35
  -2 -12   6    1.11    0.37
   1  12  -6   35.13    1.51
   1  12  -6   36.13    1.70
  -1 -12   6   37.01    1.74
   0  12  -6   28.40    1.32
   0  12  -6   26.82    1.16
   0 -12   6   25.98    1.36
  -1  12  -6   82.51    3.11
  -1  12  -6   84.07    3.22
   1 -12   6   81.77    3.34
  -2  12  -6   29.14    1.24
  -2  12  -6   29.03    1.29
   2 -12   6   28.15    1.44
  -3  12  -6    3.06    0.39
  -3  12  -6    3.27    0.54
   3 -12   6    4.20    0.63
  -4  12  -6   -0.03    0.22
  -4  12  -6    0.12    0.21
   4 -12   6   -0.45    0.36
  -5  12  -6    5.11    0.55
  -5  12  -6    6.28    0.61
  -6  12  -6   25.24    1.27
  -6  12  -6   26.40    1.32
   5  11  -6    0.96    0.48
   5  11  -6    1.19    0.60
  -5 -11   6    0.85    0.49
   4  11  -6    1.48    0.44
   4  11  -6    1.86    0.42
  -4 -11   6    1.87    0.43
   3  11  -6    0.50    0.31
   3  11  -6    0.07    0.28
  -3 -11   6    0.50    0.35
   2  11  -6    9.20    0.60
  -2 -11   6    8.69    0.75
   1  11  -6    1.64    0.29
   1  11  -6    2.24    0.28
  -1 -11   6    1.31    0.29
   0  11  -6    1.24    0.20
   0  11  -6    0.81    0.25
   0 -11   6    1.03    0.29
  -1  11  -6   10.80    0.64
  -1  11  -6   11.08    0.57
   1 -11   6    9.75    0.75
  -2  11  -6    1.02    0.21
  -2  11  -6    0.69    0.16
   2 -11   6    0.75    0.29
  -3  11  -6   83.08    3.13
  -3  11  -6   83.77    3.12
   3 -11   6   79.08    3.31
  -4  11  -6   -0.13    0.20
  -4  11  -6   -0.17    0.19
   4 -11   6   -0.50    0.33
  -5  11  -6    0.38    0.27
  -5  11  -6    0.52    0.26
   5 -11   6    0.47    0.41
  -6  11  -6   10.13    0.72
  -6  11  -6   10.05    0.76
   5  10  -6    3.85    0.53
   5  10  -6    4.51    0.69
  -5 -10   6    4.64    0.67
  -5 -10   6    2.81    0.67
   4  10  -6   11.37    0.80
   4  10  -6   12.39    1.00
  -4 -10   6   11.70    0.86
   3  10  -6   18.78    1.00
   3  10  -6   21.35    1.17
  -3 -10   6   19.37    1.10
   2  10  -6    0.04    0.24
   2  10  -6   -0.18    0.18
  -2 -10   6    0.09    0.21
   1  10  -6    3.88    0.38
   1  10  -6    3.86    0.34
  -1 -10   6    4.29    0.44
   0  10  -6    3.27    0.28
   0  10  -6    3.63    0.37
   0 -10   6    3.13    0.43
  -1  10  -6   11.25    0.56
  -1  10  -6   10.90    0.60
   1 -10   6   10.60    0.70
  -2  10  -6    1.05    0.19
  -2  10  -6    0.89    0.20
   2 -10   6    1.36    0.28
  -3  10  -6   18.95    0.89
  -3  10  -6   19.70    0.89
   3 -10   6   17.92    1.05
  -4  10  -6   11.48    0.64
  -4  10  -6   11.85    0.69
   4 -10   6   11.25    0.84
  -5  10  -6    0.32    0.22
  -5  10  -6   -0.18    0.20
   5 -10   6    0.54    0.37
  -6  10  -6    0.22    0.28
  -6  10  -6    0.34    0.29
   6 -10   6    0.15    0.46
  -7  10  -6    2.71    0.46
   6   9  -6   11.15    1.08
   6   9  -6   12.40    1.23
  -6  -9   6   12.98    1.29
  -6  -9   6   12.64    1.02
   5   9  -6    0.59    0.45
   5   9  -6    0.59    0.40
  -5  -9   6    1.00    0.40
  -5  -9   6    1.08    0.39
   4   9  -6    5.26    0.57
   4   9  -6    4.89    0.62
  -4  -9   6    5.04    0.58
   3   9  -6    1.73    0.36
   3   9  -6    0.98    0.25
  -3  -9   6    1.05    0.27
   2   9  -6    8.63    0.53
   2   9  -6    9.02    0.63
  -2  -9   6    8.84    0.65
   1   9  -6    2.60    0.26
   1   9  -6    2.12    0.29
  -1  -9   6    2.19    0.31
   0   9  -6    3.14    0.25
   0   9  -6    3.79    0.32
   0  -9   6    3.81    0.40
  -1   9  -6   56.54    2.12
  -1   9  -6   54.08    2.15
   1  -9   6   56.53    2.31
  -2   9  -6    1.23    0.19
  -2   9  -6    0.87    0.17
   2  -9   6    1.02    0.25
  -3   9  -6   15.28    0.72
  -3   9  -6   15.35    0.75
   3  -9   6   14.24    0.88
  -4   9  -6    1.54    0.25
   4  -9   6    1.61    0.33
  -5   9  -6    1.63    0.28
  -5   9  -6    2.03    0.29
   5  -9   6    1.80    0.41
  -6   9  -6    9.64    0.68
  -6   9  -6    9.66    0.75
   6  -9   6    9.90    0.89
  -7   9  -6    3.04    0.48
   6   8  -6    1.98    0.52
   6   8  -6    1.77    0.63
  -6  -8   6    1.40    0.64
  -6  -8   6    1.90    0.43
   5   8  -6    9.42    0.80
   5   8  -6    9.58    0.92
  -5  -8   6   10.77    0.79
  -5  -8   6    9.59    0.93
   4   8  -6    0.73    0.48
   4   8  -6    0.25    0.26
  -4  -8   6    0.57    0.26
   3   8  -6    7.11    0.58
   3   8  -6    6.16    0.50
  -3  -8   6    6.12    0.52
   2   8  -6   27.87    1.21
   2   8  -6   28.24    1.31
  -2  -8   6   28.51    1.30
   1   8  -6   12.06    0.66
   1   8  -6   11.80    0.59
  -1  -8   6   11.87    0.70
   0   8  -6    5.91    0.35
   0   8  -6    5.67    0.41
   0  -8   6    5.76    0.45
  -1   8  -6    4.86    0.32
  -1   8  -6    5.04    0.34
   1  -8   6    5.30    0.45
  -2   8  -6   30.12    1.22
  -2   8  -6   29.46    1.20
   2  -8   6   28.98    1.35
  -3   8  -6    5.69    0.40
  -3   8  -6    5.50    0.36
   3  -8   6    4.75    0.49
  -4   8  -6    2.29    0.33
  -4   8  -6    3.01    0.30
   4  -8   6    2.94    0.41
  -5   8  -6    2.74    0.36
  -5   8  -6    2.71    0.37
   5  -8   6    3.03    0.45
  -6   8  -6    5.40    0.49
  -6   8  -6    5.14    0.53
   6  -8   6    4.19    0.61
  -7   8  -6    0.80    0.39
   6   7  -6    3.73    0.56
   6   7  -6    3.45    0.67
  -6  -7   6    4.28    0.69
  -6  -7   6    4.02    0.62
   5   7  -6    7.09    0.85
  -5  -7   6    8.71    0.87
  -5  -7   6    8.73    0.69
   4   7  -6    0.29    0.30
   4   7  -6    0.15    0.25
  -4  -7   6    0.58    0.25
   3   7  -6   31.68    1.37
   3   7  -6   31.58    1.49
  -3  -7   6   30.79    1.39
   2   7  -6    0.31    0.17
   2   7  -6    0.07    0.12
  -2  -7   6    0.11    0.16
   1   7  -6   33.66    1.42
   1   7  -6   34.07    1.36
  -1  -7   6   34.17    1.47
   0   7  -6   13.83    0.67
   0   7  -6   13.82    0.62
   0  -7   6   13.23    0.72
  -1   7  -6   36.06    1.43
  -1   7  -6   35.17    1.43
   1  -7   6   39.38    1.45
   1  -7   6   36.03    1.57
  -2   7  -6   25.30    1.04
  -2   7  -6   25.63    1.07
   2  -7   6   27.05    1.09
   2  -7   6   25.28    1.22
  -3   7  -6    0.78    0.14
  -3   7  -6    0.57    0.16
   3  -7   6    0.91    0.23
  -4   7  -6    0.11    0.14
  -4   7  -6    0.09    0.15
   4  -7   6   -0.02    0.24
  -5   7  -6    0.34    0.21
  -5   7  -6    0.21    0.19
   5  -7   6    0.37    0.30
  -6   7  -6   12.91    0.74
  -6   7  -6   12.51    0.81
   6  -7   6   12.35    0.94
  -7   7  -6    3.20    0.49
   7  -7   6    3.88    0.67
   7   6  -6    5.57    0.72
  -7  -6   6    4.64    0.65
  -7  -6   6    6.58    0.88
   6   6  -6    1.05    0.51
   6   6  -6   -0.17    0.40
  -6  -6   6    0.63    0.49
  -6  -6   6    0.35    0.33
   5   6  -6    0.80    0.36
   5   6  -6    1.00    0.33
  -5  -6   6    0.90    0.27
  -5  -6   6    1.37    0.41
   4   6  -6    8.45    0.69
   4   6  -6    7.98    0.60
  -4  -6   6    8.13    0.56
  -4  -6   6    7.61    0.67
   3   6  -6   37.99    1.59
   3   6  -6   38.67    1.70
  -3  -6   6   36.87    1.58
   2   6  -6  117.87    4.28
   2   6  -6  114.63    4.36
  -2  -6   6  116.70    4.32
   1   6  -6   11.58    0.61
   1   6  -6   12.05    0.56
  -1  -6   6   11.57    0.64
   0   6  -6   51.65    2.00
   0   6  -6   52.30    1.96
   0  -6   6   55.78    1.98
   0  -6   6   49.77    2.08
  -1   6  -6   55.84    2.19
  -1   6  -6   60.74    2.19
   1  -6   6   57.43    2.34
   1  -6   6   61.77    2.19
  -2   6  -6    0.01    0.09
  -2   6  -6    0.23    0.10
   2  -6   6    0.17    0.14
   2  -6   6    0.34    0.15
  -3   6  -6   15.42    0.74
   3  -6   6   16.26    0.76
   3  -6   6   15.25    0.85
  -4   6  -6   24.86    1.10
  -4   6  -6   24.07    1.02
   4  -6   6   24.77    1.14
   4  -6   6   24.25    1.22
  -5   6  -6   26.05    1.20
  -5   6  -6   26.62    1.13
   5  -6   6   25.50    1.33
  -6   6  -6    4.50    0.47
  -6   6  -6    3.92    0.45
   6  -6   6    5.03    0.62
  -7   6  -6   -0.26    0.33
   7  -6   6   -0.14    0.47
   7   5  -6    0.77    0.49
  -7  -5   6   -0.03    0.48
  -7  -5   6    0.64    0.67
   6   5  -6    1.67    0.54
   6   5  -6    1.48    0.41
  -6  -5   6    1.56    0.32
  -6  -5   6    1.63    0.51
   5   5  -6   73.67    3.02
   5   5  -6   75.93    3.18
  -5  -5   6   75.69    3.16
  -5  -5   6   73.36    2.90
   4   5  -6    0.06    0.26
   4   5  -6    0.29    0.22
  -4  -5   6    0.21    0.25
   3   5  -6   64.68    2.58
   3   5  -6   68.28    2.70
  -3  -5   6   66.44    2.56
   2   5  -6  103.41    3.76
   2   5  -6  101.18    3.83
  -2  -5   6  100.75    3.77
   1   5  -6   38.58    1.61
   1   5  -6   38.82    1.56
   1   5  -6   41.88    1.63
  -1  -5   6   39.89    1.64
  -1  -5   6   43.12    1.59
   0   5  -6  110.79    4.16
   0   5  -6  118.90    4.20
   0   5  -6  115.33    4.27
   0  -5   6  117.94    4.17
   0  -5   6  123.34    4.17
   0  -5   6  111.28    4.28
  -1   5  -6   11.23    0.50
  -1   5  -6   11.37    0.63
  -1   5  -6   11.31    0.52
   1  -5   6   11.83    0.50
   1  -5   6   11.68    0.54
   1  -5   6   10.60    0.63
  -2   5  -6    4.38    0.25
  -2   5  -6    4.19    0.28
   2  -5   6    4.05    0.40
   2  -5   6    5.04    0.31
  -3   5  -6    0.13    0.09
  -3   5  -6    0.20    0.11
   3  -5   6    0.19    0.17
   3  -5   6    0.03    0.16
  -4   5  -6   22.56    1.03
   4  -5   6   21.96    1.15
   4  -5   6   24.05    1.06
  -5   5  -6    3.23    0.32
  -5   5  -6    2.37    0.32
   5  -5   6    2.75    0.40
  -6   5  -6   -0.05    0.23
  -6   5  -6    0.04    0.25
   6  -5   6    0.14    0.37
  -7   5  -6   17.16    1.02
   7   4  -6   10.77    0.98
  -7  -4   6   10.42    0.94
  -7  -4   6   10.12    1.13
   6   4  -6    3.87    0.56
  -6  -4   6    4.86    0.48
  -6  -4   6    5.03    0.71
   5   4  -6   19.77    1.19
   5   4  -6   19.74    1.09
  -5  -4   6   18.98    0.93
  -5  -4   6   19.16    1.18
   4   4  -6    0.08    0.22
   4   4  -6   -0.22    0.19
  -4  -4   6   -0.02    0.14
  -4  -4   6    0.34    0.25
   3   4  -6   -0.12    0.14
   3   4  -6    0.05    0.20
   3   4  -6    0.20    0.17
  -3  -4   6    0.25    0.16
  -3  -4   6    0.06    0.11
   2   4  -6   30.36    1.31
   2   4  -6   34.65    1.33
   2   4  -6   31.61    1.39
   1   4  -6  125.50    4.58
   1   4  -6  129.11    4.57
   1   4  -6  111.57    4.50
  -1  -4   6  127.02    4.54
  -1  -4   6  127.97    4.49
  -1  -4   6  133.37    4.60
   0   4  -6   15.98    0.69
   0   4  -6   15.95    0.75
   0  -4   6   14.44    0.82
   0  -4   6   16.18    0.66
   0  -4   6   16.05    0.66
  -1   4  -6  106.73    3.73
  -1   4  -6   96.47    3.59
  -1   4  -6   98.76    3.56
   1  -4   6   92.11    3.71
   1  -4   6  104.43    3.56
   1  -4   6  101.15    3.61
  -2   4  -6   10.55    0.43
  -2   4  -6    9.83    0.49
   2  -4   6    9.29    0.59
   2  -4   6   10.78    0.46
  -3   4  -6   25.59    1.08
  -3   4  -6   26.44    1.00
   3  -4   6   27.27    1.07
   3  -4   6   24.14    1.20
  -4   4  -6   16.54    0.80
  -4   4  -6   16.54    0.82
  -4   4  -6   17.59    0.74
   4  -4   6   16.83    0.80
   4  -4   6   15.91    0.93
  -5   4  -6    1.59    0.25
  -5   4  -6    2.21    0.36
  -5   4  -6    2.32    0.30
   5  -4   6    1.39    0.33
  -6   4  -6    4.25    0.47
  -6   4  -6    4.40    0.47
   6  -4   6    4.78    0.64
  -7   4  -6    6.28    0.65
   7  -4   6    4.73    0.74
   7   3  -6    0.29    0.47
  -7  -3   6    0.11    0.48
  -7  -3   6    0.49    0.46
   6   3  -6    0.87    0.40
  -6  -3   6    0.35    0.44
  -6  -3   6    0.33    0.21
  -6  -3   6    0.74    0.37
   5   3  -6    0.44    0.24
  -5  -3   6    0.23    0.27
  -5  -3   6    0.46    0.16
   4   3  -6   17.33    0.97
   4   3  -6   18.44    0.94
   4   3  -6   16.57    0.86
  -4  -3   6   16.91    0.96
  -4  -3   6   18.59    0.86
  -4  -3   6   15.83    0.78
   3   3  -6   33.96    1.34
   3   3  -6   31.40    1.46
   3   3  -6   32.15    1.40
  -3  -3   6   31.91    1.47
  -3  -3   6   34.99    1.33
   2   3  -6   32.80    1.43
   2   3  -6   31.57    1.36
   2   3  -6   35.94    1.35
  -2  -3   6   33.98    1.41
  -2  -3   6   36.12    1.36
  -2  -3   6   32.48    1.43
   1   3  -6  128.97    4.71
   1   3  -6  131.30    4.69
  -1  -3   6  133.34    4.63
  -1  -3   6  129.01    4.68
  -1  -3   6  126.82    4.70
   0   3  -6    9.58    0.51
   0   3  -6    9.16    0.45
   0   3  -6    9.85    0.43
   0  -3   6    9.43    0.43
   0  -3   6    8.88    0.50
   0  -3   6   10.26    0.43
  -1   3  -6    1.89    0.28
  -1   3  -6    2.39    0.18
  -1   3  -6    1.92    0.14
   1  -3   6    1.98    0.13
   1  -3   6    1.86    0.19
  -2   3  -6  120.84    4.38
  -2   3  -6  116.28    4.11
  -2   3  -6  109.24    4.19
   2  -3   6  112.57    4.36
   2  -3   6  120.48    4.24
   2  -3   6  121.79    4.14
  -3   3  -6   36.10    1.26
  -3   3  -6   35.37    1.30
  -3   3  -6   30.90    1.34
   3  -3   6   31.68    1.49
   3  -3   6   34.44    1.29
  -4   3  -6    6.94    0.38
  -4   3  -6    6.33    0.42
  -4   3  -6    5.53    0.39
   4  -3   6    5.73    0.53
  -5   3  -6   20.55    1.01
  -5   3  -6   20.65    1.00
  -5   3  -6   22.07    0.95
   5  -3   6   21.10    1.17
  -6   3  -6    1.42    0.29
   6  -3   6    2.34    0.45
  -7   3  -6   10.97    0.78
   7  -3   6   10.36    0.99
   7   2  -6    0.18    0.46
  -7  -2   6    1.33    0.51
  -7  -2   6    1.00    0.48
   6   2  -6    3.52    0.54
  -6  -2   6    3.97    0.55
  -6  -2   6    3.61    0.37
  -6  -2   6    3.83    0.60
   5   2  -6   -0.25    0.24
  -5  -2   6    0.06    0.26
  -5  -2   6   -0.18    0.30
  -5  -2   6    0.09    0.15
   4   2  -6    0.25    0.17
  -4  -2   6   -0.10    0.24
  -4  -2   6    0.01    0.16
  -4  -2   6    0.27    0.13
   3   2  -6   32.30    1.46
   3   2  -6   31.09    1.38
   3   2  -6   34.36    1.30
  -3  -2   6   32.35    1.47
  -3  -2   6   33.63    1.29
   2   2  -6    5.97    0.38
   2   2  -6    6.65    0.36
   2   2  -6    6.16    0.43
  -2  -2   6    6.45    0.36
  -2  -2   6    6.08    0.42
  -2  -2   6    6.62    0.45
  -2  -2   6    5.99    0.35
   1   2  -6    0.26    0.11
   1   2  -6    0.18    0.08
   1   2  -6    0.15    0.10
  -1  -2   6    0.24    0.10
  -1  -2   6    0.38    0.13
  -1  -2   6    0.10    0.11
  -1  -2   6    0.19    0.07
   0   2  -6    4.56    0.33
   0   2  -6    4.86    0.25
   0   2  -6    5.17    0.28
   0  -2   6    5.15    0.27
   0  -2   6    4.50    0.32
   0  -2   6    4.60    0.28
   0  -2   6    5.39    0.26
  -1   2  -6   39.57    1.52
  -1   2  -6   40.60    1.47
  -1   2  -6   44.17    1.69
   1  -2   6   40.80    1.54
   1  -2   6   40.46    1.69
   1  -2   6   41.85    1.46
  -2   2  -6   76.73    2.93
   2  -2   6   78.67    2.78
   2  -2   6   70.06    2.90
  -3   2  -6    9.52    0.51
  -3   2  -6   10.23    0.45
  -3   2  -6   11.34    0.45
   3  -2   6    9.97    0.67
  -4   2  -6   35.50    1.50
  -4   2  -6   36.55    1.43
  -4   2  -6   40.03    1.45
   4  -2   6   35.93    1.67
  -5   2  -6    7.41    0.49
  -5   2  -6    6.70    0.49
   5  -2   6    6.89    0.67
  -6   2  -6    0.23    0.25
  -6   2  -6    0.54    0.27
   6  -2   6    0.06    0.35
  -7   2  -6   10.88    0.75
   7  -2   6    8.73    1.02
   7   1  -6    0.77    0.42
  -7  -1   6    0.23    0.37
  -7  -1   6   -0.02    0.52
   6   1  -6   37.01    1.77
  -6  -1   6   35.58    1.74
  -6  -1   6   37.50    1.84
   5   1  -6   56.06    2.44
  -5  -1   6   59.56    2.18
  -5  -1   6   58.08    2.54
  -5  -1   6   60.43    2.22
   4   1  -6    0.39    0.19
  -4  -1   6    0.33    0.15
  -4  -1   6    0.01    0.11
  -4  -1   6    0.00    0.22
   3   1  -6   13.66    0.57
   3   1  -6   11.43    0.66
  -3  -1   6   12.95    0.56
  -3  -1   6   12.36    0.74
   2   1  -6   72.20    2.88
   2   1  -6   80.40    2.81
   2   1  -6   80.13    2.94
  -2  -1   6   77.05    2.82
  -2  -1   6   78.78    2.86
  -2  -1   6   74.25    2.94
  -2  -1   6   79.87    2.94
   1   1  -6  122.89    4.32
   1   1  -6  116.20    4.31
   1   1  -6  120.69    4.35
  -1  -1   6  119.32    4.28
  -1  -1   6  118.49    4.33
  -1  -1   6  120.71    4.35
  -1  -1   6  122.60    4.36
   0   1  -6   34.70    1.36
   0   1  -6   32.02    1.24
   0  -1   6   32.31    1.25
   0  -1   6   33.10    1.23
   0  -1   6   33.25    1.26
   0  -1   6   34.86    1.37
  -1   1  -6  108.24    3.86
  -1   1  -6   99.96    3.69
   1  -1   6  104.14    3.70
   1  -1   6  102.67    3.89
  -2   1  -6   46.72    1.69
   2  -1   6   43.22    1.87
   2  -1   6   46.16    1.73
  -3   1  -6   28.00    1.01
  -3   1  -6   25.21    1.07
  -3   1  -6   28.50    0.99
   3  -1   6   25.59    1.14
   3  -1   6   24.20    1.23
  -4   1  -6    0.76    0.17
  -4   1  -6    1.22    0.17
  -4   1  -6    1.05    0.19
   4  -1   6    1.04    0.27
  -5   1  -6    0.15    0.18
  -5   1  -6   -0.25    0.20
   5  -1   6   -0.26    0.27
  -6   1  -6   24.33    1.14
  -6   1  -6   23.81    1.13
   6  -1   6   21.69    1.32
  -7   1  -6    9.26    0.72
   7  -1   6    9.07    0.92
   8   0  -6    4.83    0.70
  -8   0   6    3.91    0.68
  -8   0   6    4.61    0.80
   7   0  -6   -0.04    0.38
  -7   0   6    0.11    0.37
  -7   0   6    0.27    0.49
   6   0  -6   28.92    1.50
  -6   0   6   29.55    1.56
  -6   0   6   30.11    1.50
   5   0  -6   34.21    1.57
  -5   0   6   34.90    1.66
  -5   0   6   32.87    1.56
   4   0  -6    2.85    0.35
  -4   0   6    3.38    0.41
  -4   0   6    3.51    0.20
   3   0  -6    0.80    0.13
   3   0  -6    0.44    0.18
  -3   0   6    0.62    0.20
  -3   0   6    0.84    0.13
   2   0  -6   -0.17    0.15
   2   0  -6    0.01    0.07
   2   0  -6   -0.06    0.09
  -2   0   6   -0.01    0.12
  -2   0   6    0.02    0.16
  -2   0   6   -0.01    0.08
  -2   0   6    0.04    0.13
   1   0  -6   46.90    1.81
   1   0  -6   46.53    1.76
   1   0  -6   47.57    1.78
  -1   0   6   46.95    1.74
  -1   0   6   46.01    1.81
  -1   0   6   46.53    1.81
  -1   0   6   49.14    1.80
   0   0  -6   43.57    1.64
   0   0  -6   45.02    1.68
   0   0  -6   45.71    1.77
   0   0   6   45.88    1.67
   0   0   6   44.98    1.63
   0   0   6   45.78    1.78
  -1   0  -6   20.91    0.79
  -1   0  -6   21.45    0.76
  -1   0  -6   19.70    0.95
   1   0   6   17.93    1.02
   1   0   6   21.20    0.74
   1   0   6   21.96    0.81
  -2   0  -6    3.13    0.21
  -2   0  -6    2.97    0.16
  -2   0  -6    3.11    0.14
   2   0   6    3.32    0.26
   2   0   6    2.66    0.36
  -3   0  -6    1.72    0.25
  -3   0  -6    1.64    0.19
  -3   0  -6    1.58    0.18
  -3   0  -6    1.66    0.15
   3   0   6    1.35    0.27
   3   0   6    1.08    0.22
  -4   0  -6    1.51    0.21
  -4   0  -6    2.19    0.30
  -4   0  -6    1.79    0.24
   4   0   6    1.91    0.35
  -5   0  -6    1.08    0.23
  -5   0  -6    0.91    0.23
   5   0   6    0.54    0.31
  -6   0  -6    2.89    0.42
  -6   0  -6    3.70    0.44
  -7   0  -6   18.07    1.06
  -7   0  -6   17.58    1.36
   7   0   6   20.45    1.27
   8  -1  -6    2.49    0.59
  -8   1   6    2.68    0.56
  -8   1   6    3.50    0.75
   7  -1  -6    0.32    0.42
  -7   1   6    0.67    0.50
  -7   1   6    1.43    0.43
   6  -1  -6    7.72    0.67
  -6   1   6    8.57    0.84
  -6   1   6    7.54    0.65
   5  -1  -6    0.87    0.30
  -5   1   6    1.19    0.29
  -5   1   6    1.22    0.32
   4  -1  -6   12.41    0.73
  -4   1   6   12.47    0.79
   3  -1  -6   17.47    0.87
  -3   1   6   19.34    0.95
   2  -1  -6    5.27    0.27
   2  -1  -6    5.14    0.41
  -2   1   6    5.84    0.36
  -2   1   6    4.50    0.37
  -2   1   6    5.32    0.28
   1  -1  -6   18.22    0.77
   1  -1  -6   18.46    0.81
   1  -1  -6   16.63    0.73
  -1   1   6   17.06    0.76
  -1   1   6   18.47    0.79
  -1   1   6   17.50    0.71
   0  -1  -6   29.18    1.25
   0  -1  -6   30.28    1.17
   0  -1  -6   30.35    1.12
   0   1   6   31.14    1.27
   0   1   6   30.60    1.10
   0   1   6   29.23    1.14
  -1  -1  -6  235.34    8.04
  -1  -1  -6  232.88    8.25
  -1  -1  -6  223.66    8.02
   1   1   6  225.07    8.02
   1   1   6  239.95    8.04
   1   1   6  216.93    8.23
  -2  -1  -6    4.00    0.23
  -2  -1  -6    3.98    0.21
   2   1   6    3.86    0.28
   2   1   6    3.45    0.39
   2   1   6    3.79    0.23
  -3  -1  -6   16.71    0.82
  -3  -1  -6   16.86    0.80
  -3  -1  -6   17.44    0.68
  -3  -1  -6   16.91    0.73
   3   1   6   17.82    0.80
   3   1   6   17.25    0.74
   3   1   6   15.87    0.90
  -4  -1  -6    0.61    0.19
  -4  -1  -6    0.23    0.14
  -4  -1  -6    0.47    0.14
   4   1   6    0.52    0.26
  -5  -1  -6   46.47    1.89
  -5  -1  -6   46.13    1.91
   5   1   6   50.47    2.20
  -6  -1  -6    0.65    0.25
   6   1   6    1.06    0.44
  -7  -1  -6   14.56    1.32
  -7  -1  -6   14.66    0.91
   7   1   6   13.16    1.14
  -8   2   6    2.94    0.72
  -8   2   6    2.34    0.57
   7  -2  -6    0.93    0.45
  -7   2   6    1.65    0.47
  -7   2   6    0.56    0.47
   6  -2  -6   14.95    0.97
  -6   2   6   16.39    0.98
  -6   2   6   15.02    1.04
   5  -2  -6    6.15    0.54
  -5   2   6    5.09    0.54
  -5   2   6    5.33    0.50
   4  -2  -6   19.97    1.00
  -4   2   6   19.06    0.99
  -4   2   6   20.93    1.08
   3  -2  -6   44.59    1.81
  -3   2   6   45.02    1.88
   2  -2  -6   25.67    1.18
   2  -2  -6   27.09    1.14
   2  -2  -6   27.73    1.03
  -2   2   6   24.82    1.16
  -2   2   6   27.61    1.11
  -2   2   6   26.91    1.03
   1  -2  -6   46.83    1.79
   1  -2  -6   47.11    1.87
   1  -2  -6   49.43    1.85
  -1   2   6   49.40    1.85
  -1   2   6   46.53    1.83
  -1   2   6   48.88    1.77
   0  -2  -6   24.78    0.98
   0  -2  -6   23.10    0.89
   0  -2  -6   24.91    1.07
   0   2   6   23.64    0.87
   0   2   6   23.15    0.94
   0   2   6   23.75    1.05
  -1  -2  -6   19.36    0.77
  -1  -2  -6   18.82    0.70
   1   2   6   19.12    0.74
   1   2   6   19.51    0.72
   1   2   6   17.30    0.90
  -2  -2  -6   25.45    0.99
  -2  -2  -6   24.93    0.94
  -2  -2  -6   25.36    0.96
   2   2   6   25.74    0.99
   2   2   6   22.17    1.16
   2   2   6   25.54    0.98
  -3  -2  -6    0.47    0.12
  -3  -2  -6    0.30    0.18
  -3  -2  -6    0.23    0.11
   3   2   6    0.20    0.16
   3   2   6    0.38    0.21
  -4  -2  -6    4.69    0.35
  -4  -2  -6    4.71    0.36
   4   2   6    4.43    0.51
  -5  -2  -6   19.64    0.92
  -5  -2  -6   18.96    0.97
   5   2   6   21.06    1.23
  -6  -2  -6   13.42    0.77
  -6  -2  -6   14.48    1.07
   6   2   6   12.65    1.03
  -7  -2  -6    6.02    0.81
   7   2   6    5.57    0.78
  -8   3   6    1.15    0.66
  -8   3   6    2.32    0.61
  -7   3   6   -0.15    0.43
  -7   3   6   -0.26    0.46
   6  -3  -6   14.59    0.94
  -6   3   6   13.08    0.92
  -6   3   6   13.45    0.99
   5  -3  -6   14.04    0.87
  -5   3   6   15.33    0.95
  -5   3   6   13.26    0.84
   4  -3  -6   13.90    0.79
  -4   3   6   14.10    0.78
  -4   3   6   14.13    0.86
   3  -3  -6    7.89    0.50
  -3   3   6    7.43    0.56
  -3   3   6    7.54    0.48
   2  -3  -6   23.76    1.03
   2  -3  -6   24.42    0.97
   2  -3  -6   24.47    0.96
  -2   3   6   23.62    1.01
  -2   3   6   22.74    1.07
  -2   3   6   25.39    1.04
  -2   3   6   23.97    0.95
   1  -3  -6   78.22    2.93
   1  -3  -6   80.51    2.92
   1  -3  -6   79.19    2.84
  -1   3   6   79.72    2.90
  -1   3   6   81.16    2.81
  -1   3   6   68.71    2.95
   0  -3  -6    2.85    0.36
   0  -3  -6    2.98    0.17
   0  -3  -6    3.37    0.28
   0   3   6    2.76    0.29
   0   3   6    3.01    0.23
  -1  -3  -6   43.71    1.58
   1   3   6   37.72    1.71
   1   3   6   41.88    1.54
  -2  -3  -6   73.58    2.64
  -2  -3  -6   76.94    2.68
  -2  -3  -6   76.27    2.72
   2   3   6   76.24    2.73
   2   3   6   69.25    2.95
  -3  -3  -6   67.10    2.44
  -3  -3  -6   64.72    2.45
  -3  -3  -6   69.95    2.49
   3   3   6   68.63    2.53
   3   3   6   64.09    2.75
  -4  -3  -6    5.67    0.37
  -4  -3  -6    6.88    0.48
  -4  -3  -6    6.24    0.47
   4   3   6    5.90    0.49
   4   3   6    5.49    0.64
  -5  -3  -6    2.25    0.34
  -5  -3  -6    2.22    0.46
  -5  -3  -6    2.43    0.28
   5   3   6    2.53    0.38
   5   3   6    1.46    0.43
  -6  -3  -6   18.24    0.92
  -6  -3  -6   16.32    1.23
   6   3   6   18.04    1.25
  -7   4   6    5.73    0.82
  -7   4   6    4.67    0.65
   6  -4  -6    1.79    0.40
  -6   4   6    1.50    0.35
  -6   4   6    1.39    0.43
   5  -4  -6    0.72    0.29
  -5   4   6    0.47    0.27
  -5   4   6    0.68    0.24
   4  -4  -6    1.03    0.27
  -4   4   6    0.94    0.24
  -4   4   6    0.99    0.26
   3  -4  -6   15.74    0.79
  -3   4   6   16.55    0.80
  -3   4   6   15.82    0.84
   2  -4  -6    9.15    0.46
   2  -4  -6    9.02    0.49
   2  -4  -6    8.28    0.48
  -2   4   6    9.58    0.51
  -2   4   6    8.99    0.51
  -2   4   6    7.86    0.51
   1  -4  -6   63.96    2.44
   1  -4  -6   64.74    2.32
   1  -4  -6   65.20    2.43
   1  -4  -6   59.47    2.45
  -1   4   6   65.15    2.43
  -1   4   6   65.24    2.32
  -1   4   6   65.68    2.30
  -1   4   6   57.43    2.38
   0  -4  -6   10.06    0.53
   0  -4  -6    8.94    0.56
   0   4   6    8.17    0.45
   0   4   6    8.60    0.53
  -1  -4  -6    5.55    0.36
   1   4   6    5.71    0.33
   1   4   6    5.21    0.45
  -2  -4  -6   27.42    1.10
   2   4   6   26.62    1.32
  -3  -4  -6   34.62    1.71
  -3  -4  -6   38.90    1.39
  -3  -4  -6   35.14    1.42
  -3  -4  -6   37.81    1.36
   3   4   6   35.55    1.48
   3   4   6   35.22    1.68
  -4  -4  -6    1.55    0.36
  -4  -4  -6    1.81    0.23
   4   4   6    1.51    0.37
   4   4   6    1.24    0.26
  -5  -4  -6    1.91    0.24
  -5  -4  -6    1.37    0.36
  -5  -4  -6    1.28    0.40
   5   4   6    0.97    0.41
   5   4   6    1.27    0.35
  -6  -4  -6    1.10    0.50
   6   4   6    0.09    0.52
  -7   5   6    5.42    0.78
  -7   5   6    4.64    0.70
  -6   5   6    7.30    0.73
  -6   5   6    5.82    0.67
  -5   5   6    1.32    0.32
  -5   5   6    0.52    0.27
   4  -5  -6    1.86    0.29
  -4   5   6    1.17    0.28
  -4   5   6    1.72    0.29
   3  -5  -6   27.80    1.06
   3  -5  -6   29.01    1.09
   3  -5  -6   27.54    1.21
  -3   5   6   26.79    1.27
  -3   5   6   27.43    1.21
   2  -5  -6  146.13    5.18
   2  -5  -6  146.01    5.16
  -2   5   6  147.22    5.18
  -2   5   6  131.37    5.23
  -2   5   6  144.23    5.15
   1  -5  -6    4.47    0.39
   1  -5  -6    5.01    0.45
  -1   5   6    5.63    0.30
  -1   5   6    5.11    0.29
  -1   5   6    4.68    0.37
  -1   5   6    4.90    0.35
   0  -5  -6   -0.15    0.15
   0   5   6    0.10    0.15
   0   5   6    0.10    0.09
  -1  -5  -6   56.75    2.40
  -1  -5  -6   64.54    2.34
   1   5   6   57.07    2.20
   1   5   6   56.84    2.39
  -2  -5  -6  189.59    6.98
   2   5   6  181.69    6.71
   2   5   6  191.16    6.98
  -3  -5  -6   22.19    1.25
  -3  -5  -6   23.64    0.87
  -3  -5  -6   22.90    0.86
   3   5   6   22.55    1.04
   3   5   6   21.39    1.25
  -4  -5  -6    3.44    0.67
  -4  -5  -6    3.89    0.48
   4   5   6    3.31    0.64
   4   5   6    3.39    0.48
  -5  -5  -6    1.26    0.45
  -5  -5  -6    2.13    0.42
   5   5   6    1.78    0.41
   5   5   6    0.87    0.48
  -6  -5  -6   -0.34    0.55
   6   5   6    0.89    0.53
  -7   6   6   14.18    1.12
  -7   6   6   16.74    1.12
  -6   6   6    2.42    0.43
  -6   6   6    1.93    0.44
  -5   6   6    3.61    0.52
  -5   6   6    3.72    0.49
  -4   6   6    4.66    0.48
  -4   6   6    4.71    0.46
   3  -6  -6    2.88    0.26
   3  -6  -6    2.91    0.34
  -3   6   6    3.10    0.32
  -3   6   6    2.93    0.35
   2  -6  -6   17.57    0.87
   2  -6  -6   16.12    1.01
  -2   6   6   16.47    0.85
  -2   6   6   18.65    0.82
  -2   6   6   17.40    0.98
   1  -6  -6    5.01    0.42
  -1   6   6    5.48    0.28
  -1   6   6    4.80    0.36
  -1   6   6    5.25    0.30
   0  -6  -6   19.62    1.00
   0   6   6   19.42    0.87
   0   6   6   20.55    1.00
  -1  -6  -6   15.12    0.87
   1   6   6   15.64    0.72
   1   6   6   16.05    0.89
  -2  -6  -6   43.24    1.98
   2   6   6   45.76    2.00
   2   6   6   44.03    1.77
  -3  -6  -6    4.43    0.59
   3   6   6    4.39    0.45
   3   6   6    4.51    0.57
  -4  -6  -6   22.90    1.35
   4   6   6   22.76    1.15
   4   6   6   21.61    1.35
  -5  -6  -6    0.73    0.46
  -5  -6  -6    0.74    0.41
   5   6   6    1.09    0.46
  -6  -6  -6   11.75    1.10
   6   6   6   10.67    1.12
  -7   7   6   -0.57    0.44
  -7   7   6   -0.54    0.47
  -6   7   6    2.90    0.52
  -6   7   6    3.16    0.50
  -5   7   6    0.59    0.32
  -5   7   6    1.01    0.30
  -4   7   6    7.38    0.57
  -4   7   6    7.60    0.64
   3  -7  -6    0.76    0.26
   3  -7  -6    0.82    0.19
  -3   7   6    0.65    0.21
  -3   7   6    0.99    0.23
   2  -7  -6    8.92    0.54
  -2   7   6    8.76    0.58
  -2   7   6    8.88    0.55
   1  -7  -6   19.33    0.99
  -1   7   6   20.81    0.82
  -1   7   6   20.02    0.95
  -1   7   6   22.10    0.80
   0  -7  -6    5.98    0.51
   0   7   6    5.76    0.50
   0   7   6    5.75    0.40
  -1  -7  -6   16.30    0.94
   1   7   6   16.97    0.79
   1   7   6   16.18    0.95
  -2  -7  -6    0.24    0.29
   2   7   6    0.54    0.31
   2   7   6    0.44    0.20
  -3  -7  -6   29.91    1.57
   3   7   6   29.63    1.55
   3   7   6   29.84    1.36
  -4  -7  -6    1.95    0.45
   4   7   6    1.31    0.44
   4   7   6    2.18    0.41
  -5  -7  -6    3.24    0.61
   5   7   6    3.06    0.55
  -7   8   6   11.40    1.06
  -7   8   6    9.72    0.95
  -6   8   6    0.71    0.39
  -6   8   6    0.51    0.38
  -5   8   6    2.57    0.40
  -5   8   6    2.69    0.49
  -4   8   6    3.83    0.44
  -4   8   6    3.52    0.55
   3  -8  -6    0.15    0.17
  -3   8   6    0.20    0.20
  -3   8   6    0.20    0.19
   2  -8  -6    2.81    0.35
  -2   8   6    2.96    0.27
  -2   8   6    2.92    0.36
  -2   8   6    2.64    0.33
   1  -8  -6   49.65    2.10
  -1   8   6   47.37    2.00
  -1   8   6   52.27    1.82
  -1   8   6   52.25    1.85
   0  -8  -6    8.95    0.65
   0   8   6    8.27    0.51
  -1  -8  -6   13.58    0.88
   1   8   6   13.08    0.69
  -2  -8  -6   -0.07    0.30
   2   8   6   -0.21    0.33
   2   8   6    0.35    0.23
  -3  -8  -6    0.33    0.38
   3   8   6    1.04    0.31
   3   8   6    0.79    0.39
  -4  -8  -6   -0.75    0.42
   4   8   6    0.60    0.41
   4   8   6   -0.43    0.43
  -5  -8  -6    0.03    0.54
  -6   9   6   22.05    1.27
  -6   9   6   23.59    1.37
  -5   9   6    0.76    0.38
  -4   9   6   -0.05    0.25
  -4   9   6    0.08    0.29
   3  -9  -6    1.42    0.26
  -3   9   6    1.25    0.32
  -3   9   6    2.02    0.26
   2  -9  -6  100.64    3.83
  -2   9   6   99.50    3.84
  -2   9   6  102.59    3.65
   1  -9  -6    3.05    0.47
  -1   9   6    3.06    0.35
  -1   9   6    2.82    0.18
   0  -9  -6    4.45    0.60
   0   9   6    5.59    0.44
  -1  -9  -6    1.59    0.33
   1   9   6    1.63    0.27
  -2  -9  -6    0.19    0.37
   2   9   6   -0.04    0.26
  -3  -9  -6   10.94    0.95
   3   9   6   11.34    0.81
  -4  -9  -6   -0.16    0.50
   4   9   6    0.65    0.47
  -6  10   6    0.59    0.42
  -6  10   6    0.07    0.44
  -5  10   6    0.03    0.38
  -5  10   6    0.78    0.34
  -4  10   6    5.99    0.65
  -4  10   6    5.55    0.54
   3 -10  -6    3.32    0.44
  -3  10   6    3.51    0.51
  -3  10   6    2.50    0.30
   2 -10  -6   74.55    2.90
  -2  10   6   70.37    2.99
  -2  10   6   73.47    2.66
   1 -10  -6    8.35    0.67
  -1  10   6    8.62    0.61
   0 -10  -6    1.92    0.40
   0  10   6    1.40    0.25
  -1 -10  -6   -0.50    0.36
   1  10   6    0.24    0.24
  -2 -10  -6    0.12    0.45
   2  10   6    0.82    0.35
  -3 -10  -6    1.56    0.54
   3  10   6    1.88    0.44
  -4 -10  -6   -0.04    0.59
  -5  11   6    0.65    0.38
  -5  11   6    0.68    0.38
  -4  11   6    2.75    0.48
  -4  11   6    2.61    0.36
   3 -11  -6    7.16    0.63
  -3  11   6    6.33    0.63
   2 -11  -6   23.90    1.22
  -2  11   6   23.30    1.18
   1 -11  -6    0.99    0.36
  -1  11   6    1.14    0.26
   0 -11  -6    7.03    0.77
   0  11   6    8.19    0.61
  -1 -11  -6    2.19    0.50
   1  11   6    1.87    0.33
  -2 -11  -6    0.29    0.47
   2  11   6    0.39    0.37
  -3 -11  -6    1.46    0.51
   3  11   6    2.03    0.50
  -5  12   6    9.13    0.93
  -4  12   6    0.93    0.41
  -3  12   6    1.61    0.37
   2 -12  -6   21.15    1.22
  -2  12   6   22.90    1.19
   1 -12  -6    1.51    0.46
  -1  12   6    1.70    0.35
   0 -12  -6    3.61    0.56
   0  12   6    3.49    0.50
  -1 -12  -6   17.04    1.24
   1  12   6   17.08    1.03
  -2 -12  -6    1.22    0.54
   2  12   6    1.25    0.43
  -4  13   6    0.00    0.42
  -3  13   6    5.29    0.70
   2 -13  -6    0.70    0.45
  -2  13   6    0.46    0.36
   1 -13  -6    2.57    0.50
  -1  13   6    2.29    0.43
   0 -13  -6   10.49    1.00
   0  13   6    9.42    0.77
  -1 -13  -6    7.31    0.94
   1  13   6    6.47    0.78
   2 -14  -6   11.40    1.23
  -2  14   6    9.15    0.84
   1 -14  -6    0.03    0.54
  -1  14   6    0.11    0.37
   1  16  -7    8.35    0.95
   1  16  -7    6.70    0.69
  -1 -16   7    8.34    1.01
   0  16  -7    4.33    0.59
   0  16  -7    4.43    0.61
   0 -16   7    4.82    0.73
  -1  16  -7    6.33    0.78
  -1  16  -7    6.10    0.54
   1 -16   7    5.00    0.71
  -2  16  -7    2.14    0.46
  -2  16  -7    1.76    0.34
   2 -16   7    2.73    0.63
  -3  16  -7    8.68    0.79
  -3  16  -7    7.24    0.67
   3 -16   7    9.10    1.03
   2  15  -7    3.80    0.63
   2  15  -7    5.53    0.68
  -2 -15   7    5.12    0.73
   1  15  -7    0.78    0.43
   1  15  -7    1.46    0.35
  -1 -15   7    1.55    0.50
   0  15  -7   -0.14    0.36
   0  15  -7    0.23    0.26
   0 -15   7   -0.11    0.41
  -1  15  -7    2.86    0.35
  -1  15  -7    2.30    0.47
   1 -15   7    2.22    0.54
  -2  15  -7    0.35    0.27
  -2  15  -7    0.23    0.33
   2 -15   7   -0.05    0.46
  -3  15  -7    6.91    0.59
  -3  15  -7    8.28    0.70
   3 -15   7    8.21    0.94
  -4  15  -7    0.24    0.30
  -4  15  -7    0.77    0.37
   4 -15   7    0.75    0.57
   3  14  -7    1.78    0.57
   3  14  -7    1.21    0.44
  -3 -14   7    0.53    0.53
   2  14  -7   55.50    2.48
   2  14  -7   50.58    2.22
  -2 -14   7   52.55    2.46
   1  14  -7    2.34    0.33
   1  14  -7    2.15    0.43
  -1 -14   7    2.32    0.51
   0  14  -7    1.15    0.31
   0  14  -7    1.58    0.43
   0 -14   7    1.41    0.39
  -1  14  -7    0.66    0.21
  -1  14  -7    0.11    0.29
   1 -14   7    0.06    0.40
  -2  14  -7    0.76    0.28
  -2  14  -7    0.82    0.22
   2 -14   7    0.16    0.41
  -3  14  -7    1.63    0.28
  -3  14  -7    1.85    0.33
   3 -14   7    1.56    0.47
  -4  14  -7    0.24    0.30
  -4  14  -7    0.26    0.28
   4 -14   7   -0.05    0.47
  -5  14  -7    6.47    0.66
  -5  14  -7    8.39    0.69
   5 -14   7    8.16    1.06
   4  13  -7   -0.30    0.49
   4  13  -7    1.19    0.63
  -4 -13   7    0.13    0.48
   3  13  -7    0.46    0.36
   3  13  -7    1.95    0.46
  -3 -13   7    1.23    0.47
   2  13  -7    3.26    0.51
  -2 -13   7    3.62    0.50
   1  13  -7    0.19    0.24
   1  13  -7    0.04    0.34
  -1 -13   7   -0.34    0.35
   0  13  -7    1.18    0.34
   0  13  -7    1.52    0.25
   0 -13   7    1.30    0.38
  -1  13  -7    1.00    0.22
  -1  13  -7    1.05    0.29
   1 -13   7    1.10    0.38
  -2  13  -7   14.68    0.78
   2 -13   7   13.59    0.93
  -3  13  -7    7.11    0.53
  -3  13  -7    6.79    0.61
   3 -13   7    6.52    0.78
  -4  13  -7    3.83    0.50
  -4  13  -7    3.67    0.48
   4 -13   7    4.07    0.59
  -5  13  -7    0.70    0.30
  -5  13  -7    0.53    0.28
   5 -13   7    0.51    0.54
   4  12  -7   23.14    1.30
   4  12  -7   22.95    1.43
  -4 -12   7   22.57    1.36
   3  12  -7    0.11    0.34
   3  12  -7    1.45    0.44
  -3 -12   7    0.65    0.37
   2  12  -7    2.74    0.48
   2  12  -7    3.14    0.39
  -2 -12   7    3.40    0.52
   1  12  -7   -0.13    0.30
   1  12  -7    0.17    0.20
  -1 -12   7   -0.30    0.28
   0  12  -7   70.26    2.66
   0  12  -7   70.61    2.81
   0 -12   7   67.26    2.93
  -1  12  -7   15.81    0.76
  -1  12  -7   16.29    0.88
   1 -12   7   14.45    0.94
  -2  12  -7    0.34    0.20
  -2  12  -7    0.66    0.21
   2 -12   7    0.66    0.31
  -3  12  -7    6.94    0.47
  -3  12  -7    7.44    0.52
   3 -12   7    6.29    0.75
  -4  12  -7   14.58    0.84
  -4  12  -7   16.13    0.85
  -5  12  -7    1.09    0.31
  -5  12  -7    1.24    0.30
   5 -12   7    2.00    0.52
  -6  12  -7    4.69    0.61
  -6  12  -7    2.77    0.44
   6 -12   7    3.62    0.69
   5  11  -7    1.82    0.55
   5  11  -7    1.32    0.61
  -5 -11   7    1.19    0.48
   4  11  -7    8.62    0.78
   4  11  -7    9.01    0.86
  -4 -11   7    7.81    0.80
   3  11  -7    6.15    0.58
   3  11  -7    7.20    0.70
  -3 -11   7    6.80    0.69
   2  11  -7    0.00    0.31
   2  11  -7   -0.12    0.20
  -2 -11   7    0.07    0.39
   1  11  -7   -0.45    0.23
   1  11  -7   -0.22    0.16
  -1 -11   7   -0.28    0.22
   0  11  -7   53.23    2.15
   0  11  -7   51.59    2.02
   0 -11   7   49.62    2.21
  -1  11  -7   26.13    1.19
  -1  11  -7   26.01    1.11
   1 -11   7   25.03    1.29
  -2  11  -7    6.31    0.46
  -2  11  -7    6.42    0.45
   2 -11   7    6.21    0.62
  -3  11  -7   -0.16    0.17
  -3  11  -7    0.01    0.19
   3 -11   7   -0.42    0.30
  -4  11  -7    1.60    0.26
   4 -11   7    1.93    0.44
  -5  11  -7    9.49    0.66
  -5  11  -7    8.91    0.60
   5 -11   7    6.92    0.95
  -6  11  -7    0.42    0.31
  -6  11  -7   -0.37    0.31
   6 -11   7    0.04    0.49
   5  10  -7    5.98    0.87
   5  10  -7    5.60    0.80
  -5 -10   7    6.64    0.80
  -5 -10   7    6.00    0.82
   4  10  -7   14.20    1.00
   4  10  -7   13.86    0.91
  -4 -10   7   12.38    0.92
   3  10  -7    3.96    0.47
   3  10  -7    5.10    0.65
  -3 -10   7    4.93    0.54
   2  10  -7    9.20    0.58
   2  10  -7    8.66    0.65
  -2 -10   7    9.31    0.70
   1  10  -7    0.83    0.22
   1  10  -7    0.85    0.19
  -1 -10   7    0.60    0.24
   0  10  -7   80.16    3.18
   0  10  -7   85.76    3.10
   0 -10   7   82.07    3.29
  -1  10  -7   34.88    1.45
  -1  10  -7   33.84    1.38
   1 -10   7   33.17    1.56
  -2  10  -7   45.68    1.79
  -2  10  -7   44.04    1.79
   2 -10   7   44.49    2.00
  -3  10  -7   11.12    0.63
  -3  10  -7   11.77    0.62
   3 -10   7   11.06    0.80
  -4  10  -7    0.17    0.19
  -4  10  -7    0.57    0.18
   4 -10   7    0.26    0.33
  -5  10  -7    4.31    0.42
  -5  10  -7    4.76    0.44
   5 -10   7    3.66    0.56
  -6  10  -7   21.31    1.03
  -6  10  -7   20.08    1.09
   6 -10   7   18.33    1.30
   6   9  -7    1.42    0.54
   6   9  -7    1.44    0.59
  -6  -9   7    0.93    0.60
  -6  -9   7    0.58    0.47
   5   9  -7    1.12    0.44
   5   9  -7    2.14    0.46
  -5  -9   7    2.18    0.41
  -5  -9   7    1.33    0.48
   4   9  -7    9.05    0.71
   4   9  -7    9.96    0.87
  -4  -9   7    9.53    0.75
   3   9  -7   13.08    0.85
   3   9  -7   12.40    0.75
  -3  -9   7   13.30    0.82
   2   9  -7    0.10    0.15
   2   9  -7    0.62    0.25
  -2  -9   7    0.18    0.20
   1   9  -7   13.20    0.77
   1   9  -7   13.92    0.68
  -1  -9   7   13.25    0.80
   0   9  -7   27.89    1.21
   0   9  -7   26.72    1.13
   0  -9   7   26.39    1.29
  -1   9  -7    0.46    0.15
  -1   9  -7    0.52    0.12
   1  -9   7    0.53    0.22
  -2   9  -7    1.69    0.23
  -2   9  -7    0.97    0.16
   2  -9   7    0.80    0.24
  -3   9  -7    2.18    0.26
  -3   9  -7    1.90    0.25
   3  -9   7    1.57    0.35
  -4   9  -7   14.65    0.72
  -4   9  -7   15.23    0.78
   4  -9   7   15.16    0.96
  -5   9  -7   -0.31    0.22
  -5   9  -7   -0.20    0.19
   5  -9   7    0.84    0.39
  -6   9  -7    7.63    0.67
  -6   9  -7    8.93    0.63
   6  -9   7    9.57    0.91
  -7   9  -7    2.92    0.49
   6   8  -7    7.55    0.98
   6   8  -7    7.22    0.88
  -6  -8   7    9.63    0.84
  -6  -8   7    8.53    0.97
   5   8  -7    1.05    0.46
   5   8  -7    0.98    0.41
  -5  -8   7    1.76    0.35
  -5  -8   7    2.12    0.50
   4   8  -7    9.00    0.70
   4   8  -7    9.74    0.80
  -4  -8   7    9.23    0.68
   3   8  -7    3.11    0.40
   3   8  -7    3.32    0.50
  -3  -8   7    3.49    0.43
   2   8  -7    0.52    0.16
   2   8  -7    0.70    0.21
  -2  -8   7    0.41    0.20
   1   8  -7   33.27    1.44
   1   8  -7   33.73    1.35
  -1  -8   7   31.94    1.46
   0   8  -7    1.81    0.21
   0   8  -7    1.55    0.22
   0  -8   7    1.30    0.23
  -1   8  -7   37.15    1.48
  -1   8  -7   37.55    1.46
   1  -8   7   35.62    1.61
  -2   8  -7   36.47    1.43
  -2   8  -7   37.09    1.46
   2  -8   7   34.69    1.62
  -3   8  -7   17.72    0.78
  -3   8  -7   17.65    0.83
   3  -8   7   17.54    0.98
  -4   8  -7    0.35    0.14
  -4   8  -7    0.20    0.20
   4  -8   7   -0.08    0.29
  -5   8  -7    9.66    0.61
  -5   8  -7    9.85    0.57
   5  -8   7    8.10    0.79
  -6   8  -7    1.12    0.27
  -6   8  -7    0.59    0.30
   6  -8   7    0.48    0.44
  -7   8  -7    5.32    0.68
   7  -8   7    5.40    0.88
   6   7  -7    0.85    0.47
   6   7  -7    1.48    0.55
  -6  -7   7    0.85    0.56
  -6  -7   7    0.46    0.36
   5   7  -7   31.35    1.56
   5   7  -7   30.02    1.67
  -5  -7   7   31.37    1.46
  -5  -7   7   30.92    1.69
   4   7  -7   25.20    1.20
   4   7  -7   23.21    1.31
  -4  -7   7   22.82    1.31
  -4  -7   7   23.05    1.15
   3   7  -7   52.16    2.15
   3   7  -7   55.09    2.28
  -3  -7   7   51.86    2.16
   2   7  -7   19.25    0.90
   2   7  -7   20.18    0.99
  -2  -7   7   18.67    0.95
   1   7  -7   20.61    0.89
   1   7  -7   20.50    0.96
  -1  -7   7   19.79    0.98
   0   7  -7   42.17    1.61
   0   7  -7   41.79    1.65
   0  -7   7   40.50    1.75
  -1   7  -7   18.95    0.82
  -1   7  -7   18.44    0.82
   1  -7   7   19.41    0.83
   1  -7   7   19.62    0.98
  -2   7  -7    7.64    0.40
  -2   7  -7    7.58    0.43
   2  -7   7    8.06    0.47
   2  -7   7    7.32    0.57
  -3   7  -7   16.29    0.70
  -3   7  -7   15.59    0.76
   3  -7   7   15.71    0.79
   3  -7   7   16.03    0.90
  -4   7  -7   11.56    0.62
  -4   7  -7   11.53    0.56
   4  -7   7   10.62    0.78
  -5   7  -7    6.52    0.43
   5  -7   7    5.06    0.63
  -6   7  -7    3.89    0.50
  -6   7  -7    4.34    0.46
   6  -7   7    5.07    0.74
  -7   7  -7    0.24    0.33
   7  -7   7    0.24    0.57
   7   6  -7   -0.38    0.57
  -7  -6   7    0.69    0.66
  -7  -6   7    0.14    0.53
   6   6  -7    1.29    0.51
   6   6  -7    1.68    0.48
  -6  -6   7    1.59    0.47
  -6  -6   7    1.93    0.36
   5   6  -7    0.19    0.36
  -5  -6   7   -0.10    0.38
  -5  -6   7    0.26    0.23
   4   6  -7   10.89    0.79
   4   6  -7   10.53    0.72
  -4  -6   7   11.93    0.80
  -4  -6   7   11.77    0.70
   3   6  -7    2.19    0.31
   3   6  -7    2.44    0.37
  -3  -6   7    2.08    0.29
   2   6  -7   21.05    1.05
   2   6  -7   22.34    0.99
  -2  -6   7   21.80    1.02
   1   6  -7   16.53    0.74
   1   6  -7   16.18    0.80
  -1  -6   7   17.03    0.83
   0   6  -7   49.77    1.90
   0   6  -7   48.85    1.94
   0  -6   7   48.53    2.04
   0  -6   7   54.16    1.91
  -1   6  -7   45.36    1.80
  -1   6  -7   48.08    1.79
   1  -6   7   49.98    1.79
   1  -6   7   45.96    1.96
  -2   6  -7   16.10    0.75
  -2   6  -7   17.69    0.72
   2  -6   7   15.61    0.89
   2  -6   7   17.96    0.75
  -3   6  -7    3.78    0.31
  -3   6  -7    4.14    0.27
   3  -6   7    4.26    0.38
   3  -6   7    3.58    0.44
  -4   6  -7   36.95    1.57
  -4   6  -7   38.43    1.48
   4  -6   7   39.78    1.60
   4  -6   7   37.97    1.74
  -5   6  -7    0.36    0.16
  -5   6  -7    0.41    0.22
   5  -6   7    0.00    0.32
  -6   6  -7    0.00    0.22
  -6   6  -7    0.16    0.25
   6  -6   7    0.14    0.36
  -7   6  -7    0.24    0.32
   7  -6   7    0.70    0.53
   7   5  -7    2.26    0.58
  -7  -5   7    2.78    0.70
  -7  -5   7    2.60    0.54
   6   5  -7    2.47    0.43
  -6  -5   7    2.22    0.50
  -6  -5   7    2.30    0.35
   5   5  -7   13.79    0.89
  -5  -5   7   13.20    0.77
   4   5  -7  164.44    6.12
   4   5  -7  167.36    6.25
  -4  -5   7  167.87    6.25
  -4  -5   7  160.35    6.00
   3   5  -7  110.21    4.22
   3   5  -7  108.52    4.11
  -3  -5   7  111.89    4.23
  -3  -5   7  108.67    4.07
   2   5  -7   15.95    0.82
   2   5  -7   15.08    0.74
  -2  -5   7   14.79    0.75
   1   5  -7    7.92    0.43
   1   5  -7    8.78    0.50
  -1  -5   7    8.63    0.52
  -1  -5   7    8.69    0.47
   0   5  -7    0.16    0.11
   0   5  -7    0.13    0.08
   0  -5   7   -0.01    0.11
   0  -5   7   -0.06    0.10
  -1   5  -7  116.17    4.43
  -1   5  -7  126.79    4.41
   1  -5   7  132.48    4.40
   1  -5   7  117.69    4.58
  -2   5  -7   68.79    2.44
  -2   5  -7   65.23    2.50
   2  -5   7   70.78    2.46
   2  -5   7   64.44    2.66
  -3   5  -7   64.30    2.28
  -3   5  -7   59.62    2.37
   3  -5   7   59.88    2.55
   3  -5   7   66.84    2.35
  -4   5  -7   38.84    1.40
  -4   5  -7   34.17    1.49
   4  -5   7   34.24    1.66
   4  -5   7   36.89    1.48
  -5   5  -7    6.64    0.49
  -5   5  -7    6.54    0.42
   5  -5   7    7.02    0.66
  -6   5  -7    9.21    0.66
  -6   5  -7    9.53    0.68
   6  -5   7    8.18    0.88
  -7   5  -7    2.75    0.43
   7  -5   7    3.81    0.60
   7   4  -7    0.26    0.51
  -7  -4   7    0.18    0.62
  -7  -4   7    0.48    0.47
   6   4  -7   -0.03    0.36
  -6  -4   7   -0.11    0.47
  -6  -4   7    0.63    0.24
   5   4  -7    7.36    0.75
   5   4  -7    6.96    0.65
  -5  -4   7    7.82    0.76
  -5  -4   7    7.19    0.49
   4   4  -7   45.83    2.09
   4   4  -7   47.74    1.99
  -4  -4   7   48.35    2.10
  -4  -4   7   45.49    1.85
   3   4  -7   43.83    1.85
   3   4  -7   47.44    1.83
   3   4  -7   45.25    1.95
  -3  -4   7   43.06    1.78
  -3  -4   7   46.57    1.96
   2   4  -7   12.40    0.70
   2   4  -7   11.80    0.63
   2   4  -7   13.91    0.67
  -2  -4   7   13.25    0.72
  -2  -4   7   12.40    0.63
   1   4  -7   21.64    0.92
   1   4  -7   17.80    0.98
   1   4  -7   20.66    0.87
  -1  -4   7   22.22    0.90
  -1  -4   7   19.88    0.92
   0   4  -7   -0.12    0.09
   0   4  -7   -0.33    0.13
   0   4  -7   -0.08    0.06
   0  -4   7   -0.08    0.12
   0  -4   7   -0.09    0.09
   0  -4   7    0.04    0.08
  -1   4  -7   52.04    2.02
  -1   4  -7   57.15    2.00
   1  -4   7   58.31    1.97
   1  -4   7   50.78    2.16
   1  -4   7   53.80    2.03
  -2   4  -7   75.56    2.67
  -2   4  -7   72.72    2.76
   2  -4   7   79.06    2.70
   2  -4   7   72.93    2.94
  -3   4  -7   16.96    0.79
  -3   4  -7   17.93    0.70
   3  -4   7   19.22    0.77
   3  -4   7   17.11    0.95
  -4   4  -7   35.30    1.37
  -4   4  -7   32.01    1.40
  -4   4  -7   35.42    1.31
   4  -4   7   34.63    1.36
   4  -4   7   31.43    1.58
  -5   4  -7    6.75    0.50
  -5   4  -7    7.19    0.47
   5  -4   7    7.92    0.69
  -6   4  -7    9.27    0.65
   6  -4   7    9.76    0.87
  -7   4  -7   -0.14    0.33
   7  -4   7   -0.66    0.51
   7   3  -7    2.86    0.52
  -7  -3   7    1.45    0.48
  -7  -3   7    2.99    0.59
   6   3  -7   10.91    0.81
  -6  -3   7   10.37    0.90
   5   3  -7    0.99    0.32
  -5  -3   7    0.30    0.18
  -5  -3   7    0.60    0.31
   4   3  -7   16.73    0.99
   4   3  -7   19.13    0.86
   4   3  -7   16.31    0.91
  -4  -3   7   17.97    1.02
  -4  -3   7   16.17    0.81
  -4  -3   7   17.84    0.85
   3   3  -7    9.61    0.67
   3   3  -7    9.55    0.58
   3   3  -7   10.71    0.57
  -3  -3   7   10.32    0.68
  -3  -3   7   10.60    0.55
   2   3  -7    1.98    0.26
   2   3  -7    2.21    0.24
   2   3  -7    2.61    0.27
  -2  -3   7    2.24    0.27
  -2  -3   7    2.04    0.25
   1   3  -7   74.69    2.95
   1   3  -7   83.63    3.00
   1   3  -7   80.96    3.02
  -1  -3   7   80.61    3.02
  -1  -3   7   82.70    3.03
  -1  -3   7   80.40    2.93
  -1  -3   7   81.81    2.98
   0   3  -7   63.97    2.41
   0   3  -7   59.42    2.31
   0  -3   7   64.71    2.29
   0  -3   7   61.90    2.29
  -1   3  -7   16.35    0.81
  -1   3  -7   15.36    0.62
  -1   3  -7   14.94    0.65
   1  -3   7   16.48    0.60
   1  -3   7   14.42    0.78
   1  -3   7   16.41    0.68
  -2   3  -7   14.99    0.54
  -2   3  -7   13.78    0.63
   2  -3   7   14.79    0.70
   2  -3   7   15.32    0.56
   2  -3   7   13.61    0.79
  -3   3  -7   71.43    2.51
  -3   3  -7   68.22    2.61
  -3   3  -7   73.16    2.49
   3  -3   7   66.55    2.80
  -4   3  -7    5.66    0.40
  -4   3  -7    5.98    0.37
  -4   3  -7    6.29    0.34
   4  -3   7    5.70    0.55
  -5   3  -7    5.77    0.42
  -5   3  -7    4.80    0.42
   5  -3   7    5.12    0.64
  -6   3  -7   -0.17    0.25
   6  -3   7   -0.01    0.40
  -7   3  -7   -0.01    0.33
   7  -3   7    0.18    0.48
   7   2  -7    1.71    0.51
  -7  -2   7    2.74    0.51
  -7  -2   7    1.27    0.58
   6   2  -7    3.60    0.49
  -6  -2   7    3.12    0.52
  -6  -2   7    3.21    0.50
   5   2  -7    0.16    0.25
  -5  -2   7   -0.14    0.16
  -5  -2   7    0.05    0.35
   4   2  -7   48.88    2.15
   4   2  -7   56.53    2.01
  -4  -2   7   52.18    1.99
  -4  -2   7   50.07    2.23
  -4  -2   7   51.93    1.97
   3   2  -7    6.56    0.38
   3   2  -7    5.59    0.40
  -3  -2   7    5.65    0.35
  -3  -2   7    4.90    0.45
   2   2  -7   63.44    2.56
   2   2  -7   73.24    2.52
   2   2  -7   63.51    2.62
  -2  -2   7   72.00    2.54
  -2  -2   7   68.89    2.62
  -2  -2   7   66.47    2.63
   1   2  -7    3.04    0.26
   1   2  -7    3.86    0.30
   1   2  -7    3.27    0.29
  -1  -2   7    3.25    0.23
  -1  -2   7    4.00    0.31
  -1  -2   7    3.67    0.30
  -1  -2   7    3.61    0.30
   0   2  -7   26.56    1.02
   0   2  -7   27.48    1.14
   0   2  -7   25.30    1.04
   0  -2   7   27.09    1.02
   0  -2   7   26.62    1.04
   0  -2   7   25.04    1.13
   0  -2   7   27.11    1.02
  -1   2  -7    3.47    0.21
  -1   2  -7    3.93    0.39
   1  -2   7    3.60    0.17
   1  -2   7    3.50    0.32
   1  -2   7    3.35    0.15
   1  -2   7    3.36    0.24
  -2   2  -7    3.04    0.22
   2  -2   7    2.72    0.31
   2  -2   7    3.36    0.30
  -3   2  -7   29.24    1.00
  -3   2  -7   26.64    1.12
   3  -2   7   26.52    1.32
  -4   2  -7   64.41    2.58
  -4   2  -7   69.92    2.48
  -4   2  -7   71.96    2.48
   4  -2   7   66.11    2.82
  -5   2  -7    9.61    0.53
  -5   2  -7    7.80    0.54
   5  -2   7    7.68    0.74
  -6   2  -7    4.98    0.57
   6  -2   7    6.60    1.07
  -7   2  -7    4.42    0.57
   7  -2   7    4.13    0.67
   7   1  -7   30.61    1.62
  -7  -1   7   29.01    1.57
  -7  -1   7   30.88    1.71
   6   1  -7   10.17    0.83
  -6  -1   7    9.84    0.80
  -6  -1   7   10.04    0.93
   5   1  -7   28.14    1.43
  -5  -1   7   29.50    1.15
  -5  -1   7   31.16    1.35
  -5  -1   7   29.15    1.50
   4   1  -7   28.11    1.33
  -4  -1   7   30.19    1.14
  -4  -1   7   27.39    1.39
  -4  -1   7   30.88    1.16
   3   1  -7   35.96    1.33
   3   1  -7   33.88    1.47
  -3  -1   7   35.60    1.34
  -3  -1   7   32.92    1.53
   2   1  -7   93.44    3.41
   2   1  -7   83.05    3.34
   2   1  -7   96.46    3.28
  -2  -1   7   83.90    3.40
  -2  -1   7   91.89    3.30
  -2  -1   7   88.66    3.40
  -2  -1   7   95.71    3.37
   1   1  -7    7.43    0.43
   1   1  -7    7.49    0.40
   1   1  -7    7.43    0.43
  -1  -1   7    7.20    0.44
  -1  -1   7    7.84    0.44
  -1  -1   7    7.20    0.44
  -1  -1   7    7.76    0.37
   0   1  -7   32.31    1.32
   0   1  -7   31.38    1.19
   0  -1   7   31.65    1.21
   0  -1   7   30.87    1.18
   0  -1   7   30.50    1.20
   0  -1   7   32.04    1.33
  -1   1  -7   90.56    3.31
  -1   1  -7   87.68    3.11
   1  -1   7   90.33    3.13
   1  -1   7   79.07    3.29
  -2   1  -7   13.66    0.58
   2  -1   7   11.98    0.73
   2  -1   7   13.93    0.63
  -3   1  -7   85.38    3.13
   3  -1   7   85.70    3.38
  -4   1  -7  154.16    5.32
  -4   1  -7  142.68    5.44
  -4   1  -7  158.88    5.36
   4  -1   7  145.76    5.70
  -5   1  -7    3.19    0.37
  -5   1  -7    3.82    0.39
   5  -1   7    3.08    0.48
  -6   1  -7    1.59    0.31
   6  -1   7    1.43    0.48
  -7   1  -7    4.24    0.61
   7  -1   7    4.27    0.68
   7   0  -7    4.00    0.57
  -7   0   7    3.38    0.52
  -7   0   7    3.90    0.62
   6   0  -7   22.40    1.25
  -6   0   7   20.72    1.23
  -6   0   7   22.41    1.29
   5   0  -7    3.80    0.49
  -5   0   7    3.50    0.51
   4   0  -7    6.12    0.49
  -4   0   7    5.58    0.56
   3   0  -7    0.05    0.13
   3   0  -7    0.07    0.08
  -3   0   7   -0.03    0.10
  -3   0   7    0.05    0.19
   2   0  -7   61.99    2.20
   2   0  -7   54.02    2.26
   2   0  -7   59.95    2.34
  -2   0   7   62.24    2.23
  -2   0   7   58.21    2.34
  -2   0   7   60.44    2.24
  -2   0   7   60.80    2.35
   1   0  -7    7.74    0.44
   1   0  -7    7.42    0.40
   1   0  -7    7.80    0.46
  -1   0   7    7.41    0.44
  -1   0   7    7.72    0.37
  -1   0   7    7.93    0.45
  -1   0   7    7.20    0.46
   0   0  -7    7.40    0.35
   0   0  -7    7.51    0.40
   0   0  -7    7.56    0.49
   0   0   7    8.20    0.50
   0   0   7    7.34    0.34
   0   0   7    7.78    0.38
  -1   0  -7   51.96    1.90
  -1   0  -7   52.43    2.11
  -1   0  -7   53.51    1.88
   1   0   7   55.09    1.92
   1   0   7   53.19    1.86
   1   0   7   48.39    2.10
  -2   0  -7    7.77    0.36
   2   0   7    7.66    0.42
   2   0   7    6.58    0.54
  -3   0  -7    9.58    0.41
  -3   0  -7    8.59    0.44
  -3   0  -7    9.35    0.37
  -3   0  -7    9.20    0.54
   3   0   7    9.62    0.56
   3   0   7    8.23    0.62
  -4   0  -7   18.54    0.75
  -4   0  -7   18.30    0.83
  -4   0  -7   19.37    0.81
   4   0   7   18.84    1.08
  -5   0  -7    5.42    0.43
  -5   0  -7    5.02    0.53
   5   0   7    4.77    0.64
  -6   0  -7   -0.17    0.24
   6   0   7    0.11    0.41
  -7   0  -7    0.25    0.34
   7   0   7    0.85    0.57
   7  -1  -7    3.54    0.57
  -7   1   7    3.18    0.55
  -7   1   7    2.54    0.59
   6  -1  -7   -0.16    0.38
  -6   1   7   -0.22    0.38
  -6   1   7   -0.23    0.34
   5  -1  -7    8.47    0.66
  -5   1   7    8.75    0.67
  -5   1   7    8.35    0.74
   4  -1  -7    0.55    0.21
  -4   1   7    0.11    0.21
   3  -1  -7    8.21    0.50
  -3   1   7    7.66    0.54
   2  -1  -7   23.71    0.94
   2  -1  -7   25.65    1.21
   2  -1  -7   21.22    1.00
  -2   1   7   22.90    1.07
  -2   1   7   23.82    0.99
  -2   1   7   24.08    0.96
   1  -1  -7   10.37    0.56
   1  -1  -7   10.02    0.50
   1  -1  -7   10.82    0.58
  -1   1   7   11.25    0.56
  -1   1   7   10.94    0.47
  -1   1   7   10.78    0.55
   0  -1  -7   92.12    3.41
   0  -1  -7   93.26    3.31
   0  -1  -7   91.63    3.25
   0   1   7   91.88    3.22
   0   1   7   85.40    3.51
   0   1   7   90.60    3.27
  -1  -1  -7    9.33    0.39
  -1  -1  -7    9.40    0.42
   1   1   7    9.53    0.41
   1   1   7    9.66    0.39
   1   1   7    7.97    0.56
  -2  -1  -7    8.46    0.35
  -2  -1  -7    7.92    0.37
   2   1   7    8.61    0.43
   2   1   7    7.65    0.36
   2   1   7    7.19    0.57
  -3  -1  -7    0.08    0.09
  -3  -1  -7   -0.02    0.14
  -3  -1  -7    0.00    0.11
  -3  -1  -7    0.36    0.22
   3   1   7    0.05    0.19
   3   1   7   -0.02    0.13
   3   1   7   -0.06    0.21
  -4  -1  -7   34.48    1.43
  -4  -1  -7   38.03    1.45
  -4  -1  -7   37.15    1.36
   4   1   7   33.79    1.69
  -5  -1  -7    0.84    0.21
  -5  -1  -7    0.92    0.27
   5   1   7    0.59    0.39
  -6  -1  -7   13.39    0.79
   6   1   7   14.28    1.07
  -7  -1  -7    2.40    0.63
  -7  -1  -7    1.30    0.38
   7   1   7    0.68    0.63
   7  -2  -7    3.93    0.62
  -7   2   7    3.18    0.58
  -7   2   7    3.33    0.59
   6  -2  -7   16.24    1.05
  -6   2   7   17.10    1.04
  -6   2   7   15.69    1.09
   5  -2  -7    3.04    0.44
  -5   2   7    3.99    0.51
  -5   2   7    2.70    0.43
   4  -2  -7    0.97    0.25
  -4   2   7    1.25    0.28
  -4   2   7    1.57    0.26
   3  -2  -7    1.17    0.22
  -3   2   7    0.94    0.23
   2  -2  -7    6.86    0.41
   2  -2  -7    7.16    0.39
  -2   2   7    6.68    0.37
  -2   2   7    6.13    0.46
  -2   2   7    7.42    0.43
   1  -2  -7   13.67    0.70
   1  -2  -7   14.30    0.64
   1  -2  -7   14.27    0.72
  -1   2   7   15.01    0.60
  -1   2   7   14.65    0.70
  -1   2   7   14.69    0.70
   0  -2  -7   18.88    0.91
   0  -2  -7   19.20    0.74
   0  -2  -7   18.53    0.81
   0   2   7   16.94    0.87
   0   2   7   19.25    0.70
   0   2   7   18.83    0.77
  -1  -2  -7    2.97    0.23
  -1  -2  -7    2.69    0.15
   1   2   7    2.78    0.18
   1   2   7    2.24    0.30
   1   2   7    2.69    0.18
  -2  -2  -7    2.75    0.23
  -2  -2  -7    2.97    0.18
  -2  -2  -7    2.76    0.25
   2   2   7    2.70    0.37
   2   2   7    3.10    0.23
   2   2   7    3.09    0.25
  -3  -2  -7    1.44    0.19
  -3  -2  -7    1.39    0.19
  -3  -2  -7    1.36    0.25
   3   2   7    1.72    0.22
   3   2   7    0.74    0.24
  -4  -2  -7   71.12    2.60
  -4  -2  -7   66.56    2.56
  -4  -2  -7   69.64    2.61
   4   2   7   64.03    2.88
   4   2   7   72.57    2.63
  -5  -2  -7    1.26    0.30
  -5  -2  -7    1.81    0.24
   5   2   7    2.24    0.45
  -6  -2  -7    2.79    0.35
  -6  -2  -7    1.91    0.55
   6   2   7    3.03    0.57
   7  -3  -7    0.51    0.40
  -7   3   7   -0.18    0.40
  -7   3   7    0.12    0.49
   6  -3  -7    0.88    0.35
  -6   3   7    1.05    0.38
  -6   3   7    1.71    0.37
   5  -3  -7    0.41    0.28
  -5   3   7   -0.01    0.27
  -5   3   7    0.17    0.28
   4  -3  -7    2.53    0.35
  -4   3   7    2.65    0.38
  -4   3   7    2.51    0.39
   3  -3  -7   27.25    1.24
  -3   3   7   29.48    1.25
  -3   3   7   28.75    1.31
   2  -3  -7   25.81    1.04
   2  -3  -7   23.67    1.09
   2  -3  -7   26.35    1.06
  -2   3   7   25.87    1.04
  -2   3   7   25.57    1.15
  -2   3   7   26.08    1.07
   1  -3  -7   44.48    1.76
   1  -3  -7   42.65    1.76
   1  -3  -7   43.72    1.66
  -1   3   7   45.10    1.62
  -1   3   7   41.27    1.71
  -1   3   7   45.76    1.75
   0  -3  -7    6.74    0.43
   0  -3  -7    6.20    0.30
   0  -3  -7    6.58    0.57
   0   3   7    6.43    0.36
   0   3   7    5.44    0.43
   0   3   7    6.36    0.26
  -1  -3  -7   68.30    2.42
   1   3   7   60.42    2.59
   1   3   7   66.18    2.37
  -2  -3  -7    1.18    0.17
  -2  -3  -7    1.00    0.14
  -2  -3  -7    1.16    0.11
   2   3   7    1.25    0.17
   2   3   7    0.72    0.22
  -3  -3  -7   11.62    0.56
  -3  -3  -7   11.83    0.51
  -3  -3  -7   12.48    0.61
   3   3   7   10.73    0.77
   3   3   7   12.10    0.62
  -4  -3  -7    0.12    0.20
  -4  -3  -7    0.01    0.13
   4   3   7   -0.30    0.22
   4   3   7   -0.06    0.31
  -5  -3  -7    2.32    0.54
  -5  -3  -7    2.55    0.33
  -5  -3  -7    2.75    0.36
   5   3   7    2.55    0.48
  -6  -3  -7    4.78    0.72
   6   3   7    4.96    0.69
  -7   4   7    0.44    0.41
  -7   4   7    0.13    0.48
   6  -4  -7   19.02    1.11
  -6   4   7   17.64    1.18
  -6   4   7   16.93    1.08
   5  -4  -7   11.59    0.82
  -5   4   7   12.11    0.77
  -5   4   7   11.76    0.85
   4  -4  -7    0.51    0.23
  -4   4   7    0.25    0.24
  -4   4   7    0.24    0.21
   3  -4  -7    0.53    0.10
   3  -4  -7    0.22    0.18
   3  -4  -7    0.48    0.12
  -3   4   7    0.71    0.21
  -3   4   7    0.11    0.17
   2  -4  -7   18.63    0.84
   2  -4  -7   15.70    0.88
   2  -4  -7   18.95    0.81
  -2   4   7   17.57    0.88
  -2   4   7   18.81    0.82
  -2   4   7   19.33    0.81
   1  -4  -7   24.58    1.10
   1  -4  -7   23.12    1.06
   1  -4  -7   24.68    0.97
  -1   4   7   24.23    0.93
  -1   4   7   22.93    1.03
  -1   4   7   23.06    1.05
  -1   4   7   25.04    0.97
   0  -4  -7   11.25    0.59
   0   4   7   10.20    0.63
   0   4   7    9.99    0.51
  -1  -4  -7    8.88    0.52
   1   4   7    8.37    0.60
  -2  -4  -7    8.51    0.49
   2   4   7    8.52    0.66
  -3  -4  -7    0.31    0.09
  -3  -4  -7    0.03    0.15
  -3  -4  -7    0.16    0.19
   3   4   7    0.02    0.27
   3   4   7    0.66    0.30
  -4  -4  -7    1.88    0.24
   4   4   7    2.24    0.35
  -5  -4  -7    7.57    0.86
   5   4   7    8.85    0.89
  -6  -4  -7    0.00    0.49
   6   4   7   -0.34    0.52
  -7   5   7    1.28    0.52
  -7   5   7    2.08    0.53
  -6   5   7    0.54    0.39
  -6   5   7   -0.08    0.33
   5  -5  -7    4.62    0.56
  -5   5   7    5.17    0.54
   4  -5  -7    6.97    0.55
  -4   5   7    6.08    0.51
  -4   5   7    6.53    0.56
   3  -5  -7    5.21    0.37
   3  -5  -7    4.94    0.41
   3  -5  -7    5.75    0.32
  -3   5   7    5.88    0.43
  -3   5   7    4.90    0.45
   2  -5  -7   21.16    1.00
   2  -5  -7   23.55    0.98
  -2   5   7   22.98    0.96
  -2   5   7   21.13    1.03
   1  -5  -7   15.59    0.79
  -1   5   7   15.24    0.75
  -1   5   7   14.85    0.78
  -1   5   7   16.33    0.64
  -1   5   7   16.97    0.67
   0  -5  -7    0.09    0.18
   0   5   7    0.21    0.20
   0   5   7    0.25    0.11
  -1  -5  -7    8.88    0.64
   1   5   7    9.58    0.47
   1   5   7    8.91    0.66
  -2  -5  -7   16.33    0.97
   2   5   7   14.61    0.95
   2   5   7   15.63    0.73
  -3  -5  -7    1.06    0.34
   3   5   7    1.07    0.23
   3   5   7    0.86    0.33
  -4  -5  -7    0.54    0.38
   4   5   7    0.76    0.30
   4   5   7    0.64    0.36
  -5  -5  -7    0.93    0.49
   5   5   7    1.53    0.52
  -6  -5  -7    1.97    0.59
   6   5   7    0.79    0.59
  -7   6   7   14.53    1.16
  -7   6   7   16.38    1.15
  -6   6   7    0.40    0.36
  -6   6   7    0.40    0.38
  -5   6   7    1.00    0.31
  -5   6   7    1.00    0.33
  -4   6   7    2.99    0.41
  -4   6   7    2.50    0.38
   3  -6  -7   49.37    1.85
   3  -6  -7   50.72    1.90
  -3   6   7   49.32    2.07
  -3   6   7   46.71    1.95
   2  -6  -7   89.47    3.36
   2  -6  -7   88.34    3.38
  -2   6   7   90.60    3.30
  -2   6   7   90.76    3.43
   1  -6  -7   34.34    1.51
  -1   6   7   34.28    1.50
  -1   6   7   39.04    1.32
  -1   6   7   36.10    1.31
  -1   6   7   32.20    1.44
   0  -6  -7   79.49    3.07
   0   6   7   76.92    3.06
   0   6   7   76.14    2.89
  -1  -6  -7   35.04    1.64
   1   6   7   36.07    1.43
   1   6   7   35.58    1.64
  -2  -6  -7    0.99    0.33
   2   6   7    0.66    0.29
   2   6   7    1.06    0.22
  -3  -6  -7    6.21    0.90
   3   6   7    6.78    0.94
   3   6   7    8.10    0.57
  -4  -6  -7   -0.37    0.34
   4   6   7    0.17    0.33
   4   6   7   -0.16    0.38
  -5  -6  -7   22.74    1.47
   5   6   7   21.58    1.39
  -7   7   7    0.96    0.52
  -7   7   7    0.63    0.56
  -6   7   7    2.42    0.45
  -5   7   7   20.65    1.21
  -5   7   7   21.80    1.14
  -4   7   7    1.16    0.27
  -4   7   7    0.69    0.29
   3  -7  -7   40.66    1.55
  -3   7   7   38.01    1.72
  -3   7   7   38.29    1.71
   2  -7  -7    2.02    0.32
  -2   7   7    1.83    0.26
  -2   7   7    1.91    0.29
   1  -7  -7   71.51    2.93
  -1   7   7   77.50    2.68
  -1   7   7   79.49    2.68
  -1   7   7   71.55    2.86
   0  -7  -7   15.66    0.88
   0   7   7   14.77    0.85
   0   7   7   13.98    0.72
  -1  -7  -7   -0.31    0.27
   1   7   7   -0.17    0.24
   1   7   7    0.10    0.15
  -2  -7  -7   48.25    2.21
   2   7   7   48.70    1.96
   2   7   7   49.87    2.23
  -3  -7  -7    0.65    0.38
   3   7   7    0.14    0.37
   3   7   7    1.07    0.29
  -4  -7  -7   23.53    1.44
   4   7   7   23.86    1.23
   4   7   7   22.32    1.40
  -5  -7  -7    0.70    0.48
   5   7   7    0.63    0.50
  -6   8   7    2.11    0.58
  -6   8   7    1.67    0.44
  -5   8   7   -0.11    0.34
  -5   8   7    0.06    0.30
  -4   8   7    6.28    0.58
  -4   8   7    5.48    0.56
   3  -8  -7   -0.01    0.19
  -3   8   7    0.10    0.19
  -3   8   7   -0.24    0.24
   2  -8  -7   18.41    0.93
  -2   8   7   18.80    0.96
   1  -8  -7   24.41    1.24
  -1   8   7   27.05    0.93
  -1   8   7   24.46    1.13
   0  -8  -7    6.51    0.61
   0   8   7    6.84    0.46
  -1  -8  -7    0.71    0.33
   1   8   7    1.15    0.35
   1   8   7    0.96    0.21
  -2  -8  -7    2.17    0.42
   2   8   7    1.29    0.35
   2   8   7    0.92    0.27
  -3  -8  -7    2.75    0.50
   3   8   7    2.34    0.38
   3   8   7    2.35    0.48
  -4  -8  -7    4.50    0.67
   4   8   7    5.49    0.85
  -6   9   7    0.42    0.40
  -6   9   7   -0.11    0.44
  -5   9   7    4.25    0.58
  -5   9   7    3.56    0.59
  -4   9   7    0.42    0.30
  -4   9   7   -0.21    0.27
   3  -9  -7    4.87    0.47
  -3   9   7    6.20    0.57
  -3   9   7    4.83    0.44
   2  -9  -7    2.58    0.35
  -2   9   7    2.12    0.32
   1  -9  -7    2.23    0.38
  -1   9   7    1.81    0.29
   0  -9  -7    2.25    0.42
   0   9   7    3.16    0.36
  -1  -9  -7    1.62    0.43
   1   9   7    2.20    0.30
  -2  -9  -7    2.58    0.50
   2   9   7    2.77    0.39
  -3  -9  -7   -0.04    0.45
   3   9   7    0.62    0.37
  -4  -9  -7    6.36    0.95
  -6  10   7   -0.58    0.47
  -6  10   7   -0.10    0.47
  -5  10   7    0.47    0.40
  -5  10   7    0.07    0.38
  -4  10   7    1.47    0.39
  -4  10   7    1.64    0.33
   3 -10  -7   64.95    2.65
  -3  10   7   69.38    2.79
  -3  10   7   69.70    2.60
   2 -10  -7    5.18    0.60
  -2  10   7    6.25    0.55
   1 -10  -7   10.55    0.82
   0 -10  -7   -0.22    0.52
   0  10   7   -0.11    0.22
  -1 -10  -7    3.50    0.56
   1  10   7    3.90    0.46
  -2 -10  -7    0.40    0.45
   2  10   7    0.62    0.39
  -3 -10  -7    4.09    0.60
   3  10   7    3.66    0.53
  -5  11   7   18.50    1.37
  -5  11   7   18.87    1.21
  -4  11   7    1.22    0.41
  -3  11   7    0.14    0.29
   2 -11  -7    6.52    0.70
  -2  11   7    8.69    0.65
   1 -11  -7    0.28    0.34
  -1  11   7    0.39    0.26
   0 -11  -7    0.33    0.41
   0  11   7    0.82    0.29
  -1 -11  -7    4.63    0.64
   1  11   7    4.79    0.56
  -2 -11  -7   -0.36    0.50
   2  11   7    0.38    0.37
  -3 -11  -7    3.08    0.67
   3  11   7    3.97    0.62
  -4  12   7   24.63    1.40
  -3  12   7   25.28    1.34
   2 -12  -7    2.33    0.48
  -2  12   7    2.27    0.39
   1 -12  -7   11.56    0.97
  -1  12   7   10.72    0.77
   0 -12  -7    0.01    0.43
   0  12   7    0.72    0.32
  -1 -12  -7    5.73    0.86
   1  12   7    5.64    0.67
  -2 -12  -7   16.86    1.34
   2  12   7   18.39    1.17
  -3  13   7    0.34    0.40
   2 -13  -7    5.05    0.67
  -2  13   7    6.20    0.68
   1 -13  -7    1.57    0.52
  -1  13   7    0.73    0.41
   0  13   7    1.27    0.42
   1  16  -8   16.67    1.02
   1  16  -8   14.97    1.15
  -1 -16   8   16.91    1.33
   0  16  -8    3.01    0.41
   0  16  -8    2.32    0.48
   0 -16   8    2.95    0.68
  -1  16  -8    3.28    0.56
   1 -16   8    3.76    0.65
  -2  16  -8    0.37    0.33
  -2  16  -8    0.76    0.39
   2 -16   8    0.88    0.56
  -3  16  -8    0.96    0.42
  -3  16  -8    0.82    0.34
   3 -16   8    1.23    0.61
   2  15  -8    7.90    0.96
   2  15  -8    7.66    0.78
  -2 -15   8    6.55    0.97
   1  15  -8   22.42    1.13
   1  15  -8   21.72    1.29
  -1 -15   8   20.61    1.40
   0  15  -8    0.69    0.39
   0  15  -8    0.48    0.28
   0 -15   8    0.06    0.49
  -1  15  -8    1.54    0.31
  -1  15  -8    1.62    0.42
   1 -15   8    1.32    0.48
  -2  15  -8   23.60    1.13
  -2  15  -8   24.23    1.27
   2 -15   8   22.99    1.46
  -3  15  -8    1.40    0.31
  -3  15  -8    1.50    0.35
   3 -15   8    0.14    0.54
  -4  15  -8    0.05    0.37
  -4  15  -8   -0.44    0.31
   4 -15   8    0.48    0.57
   3  14  -8   20.59    1.20
   3  14  -8   21.59    1.47
  -3 -14   8   20.47    1.40
   2  14  -8   28.76    1.52
   2  14  -8   23.54    1.28
  -2 -14   8   23.72    1.43
   1  14  -8    5.59    0.74
   1  14  -8    5.68    0.53
  -1 -14   8    6.10    0.80
   0  14  -8    0.41    0.25
   0  14  -8    0.23    0.33
   0 -14   8    0.12    0.39
  -1  14  -8    0.76    0.31
  -1  14  -8    0.09    0.21
   1 -14   8    0.13    0.37
  -2  14  -8    1.85    0.35
  -2  14  -8    1.22    0.25
   2 -14   8    1.06    0.44
  -3  14  -8    5.38    0.57
  -3  14  -8    4.84    0.49
   3 -14   8    5.31    0.80
  -4  14  -8    1.12    0.32
  -4  14  -8    1.87    0.38
   4 -14   8    1.68    0.56
  -5  14  -8   -0.66    0.34
   5 -14   8   -0.14    0.59
   4  13  -8    2.79    0.52
   4  13  -8    1.12    0.67
  -4 -13   8    2.61    0.54
   3  13  -8    6.64    0.67
   3  13  -8    6.34    0.92
  -3 -13   8    5.37    0.71
   2  13  -8    0.61    0.30
   2  13  -8    1.47    0.39
  -2 -13   8    0.83    0.40
   1  13  -8   10.35    0.81
  -1 -13   8    9.13    0.78
   0  13  -8    0.14    0.29
   0  13  -8    0.32    0.24
   0 -13   8    0.34    0.36
  -1  13  -8    1.23    0.40
   1 -13   8    1.61    0.38
  -2  13  -8    0.84    0.20
  -2  13  -8    0.81    0.32
   2 -13   8    0.20    0.34
  -3  13  -8    1.41    0.28
   3 -13   8    0.58    0.43
  -4  13  -8    2.55    0.36
  -4  13  -8    2.28    0.35
   4 -13   8    2.13    0.54
  -5  13  -8    1.51    0.37
  -5  13  -8    2.26    0.38
   5 -13   8    3.04    0.62
   4  12  -8    9.93    0.90
   4  12  -8    8.46    1.04
  -4 -12   8    8.01    0.88
   3  12  -8   10.96    0.92
   3  12  -8    9.30    0.76
  -3 -12   8   11.02    0.88
   2  12  -8    6.93    0.66
   2  12  -8    6.81    0.59
  -2 -12   8    5.80    0.70
   1  12  -8    1.43    0.35
   1  12  -8    1.44    0.25
  -1 -12   8    1.28    0.32
   0  12  -8    7.01    0.48
   0  12  -8    6.84    0.58
   0 -12   8    6.24    0.99
  -1  12  -8    0.67    0.19
  -1  12  -8    0.77    0.26
   1 -12   8    1.29    0.38
  -2  12  -8    4.97    0.46
  -2  12  -8    4.53    0.42
   2 -12   8    5.13    0.73
  -3  12  -8   20.89    1.01
  -3  12  -8   21.25    1.01
   3 -12   8   19.58    1.39
  -4  12  -8   21.50    1.06
  -4  12  -8   21.40    1.05
   4 -12   8   21.34    1.32
  -5  12  -8   19.02    1.11
  -5  12  -8   20.41    1.22
   5 -12   8   17.94    1.31
  -6  12  -8    1.38    0.37
   5  11  -8   -0.86    0.49
   5  11  -8   -0.76    0.59
  -5 -11   8    0.24    0.49
  -5 -11   8   -0.74    0.61
   4  11  -8    2.30    0.54
   4  11  -8    2.17    0.45
  -4 -11   8    1.66    0.43
   3  11  -8   -0.14    0.34
   3  11  -8    0.05    0.47
  -3 -11   8    0.02    0.32
   2  11  -8   44.09    2.01
   2  11  -8   43.93    1.85
   1  11  -8   47.37    1.94
   1  11  -8   48.01    2.06
  -1 -11   8   48.49    2.13
   0  11  -8    3.41    0.34
   0  11  -8    3.26    0.42
   0 -11   8    2.82    0.45
  -1  11  -8    0.41    0.16
  -1  11  -8   -0.20    0.18
   1 -11   8   -0.35    0.25
  -2  11  -8   25.88    1.18
  -2  11  -8   26.69    1.15
   2 -11   8   25.69    1.36
  -3  11  -8    2.81    0.36
   3 -11   8    1.97    0.45
  -4  11  -8    0.38    0.21
  -4  11  -8    0.43    0.21
   4 -11   8    0.49    0.39
  -5  11  -8    2.97    0.42
  -5  11  -8    2.21    0.33
   5 -11   8    2.96    0.55
  -6  11  -8    0.59    0.33
   6 -11   8    0.57    0.56
   5  10  -8    1.19    0.49
   5  10  -8    0.89    0.57
  -5 -10   8    1.37    0.45
  -5 -10   8    2.19    0.61
   4  10  -8    0.21    0.42
   4  10  -8   -0.09    0.33
  -4 -10   8   -0.02    0.31
   3  10  -8    2.58    0.42
   3  10  -8    2.71    0.37
  -3 -10   8    2.33    0.40
   2  10  -8    1.14    0.22
   2  10  -8    1.13    0.33
  -2 -10   8    0.99    0.32
   1  10  -8    5.04    0.45
   1  10  -8    4.96    0.40
  -1 -10   8    5.14    0.50
   0  10  -8   22.97    1.07
   0  10  -8   22.50    0.99
   0 -10   8   21.91    1.18
  -1  10  -8   85.31    3.20
  -1  10  -8   84.73    3.24
   1 -10   8   86.48    3.43
  -2  10  -8    4.37    0.36
  -2  10  -8    4.55    0.35
   2 -10   8    3.23    0.52
  -3  10  -8   31.21    1.30
  -3  10  -8   30.45    1.33
   3 -10   8   30.44    1.54
  -4  10  -8   14.34    0.76
  -4  10  -8   14.08    0.73
   4 -10   8   14.53    1.00
  -5  10  -8    0.09    0.22
  -5  10  -8    0.36    0.26
  -6  10  -8    0.15    0.31
   6 -10   8   -0.41    0.49
   6   9  -8    1.30    0.69
   6   9  -8    1.88    0.56
  -6  -9   8    1.71    0.49
  -6  -9   8    0.68    0.70
   5   9  -8   15.11    1.06
   5   9  -8   15.01    1.20
  -5  -9   8   15.62    1.19
  -5  -9   8   15.55    0.99
   4   9  -8    5.66    0.60
   4   9  -8    6.00    0.75
  -4  -9   8    4.87    0.59
   3   9  -8   10.68    0.70
   3   9  -8   11.81    0.85
  -3  -9   8   11.04    0.75
   2   9  -8   24.93    1.24
   2   9  -8   24.56    1.14
  -2  -9   8   26.30    1.27
   1   9  -8    7.42    0.48
   1   9  -8    7.47    0.57
  -1  -9   8    8.11    0.62
   0   9  -8    5.04    0.42
   0   9  -8    5.21    0.35
   0  -9   8    4.58    0.49
  -1   9  -8   14.36    0.69
  -1   9  -8   14.38    0.72
   1  -9   8   14.69    0.89
  -2   9  -8    1.27    0.19
  -2   9  -8    0.91    0.17
   2  -9   8    0.58    0.26
  -3   9  -8   -0.10    0.13
  -3   9  -8    0.21    0.13
   3  -9   8   -0.16    0.27
  -4   9  -8   31.93    1.56
  -4   9  -8   35.02    1.38
   4  -9   8   33.83    1.68
  -5   9  -8    6.96    0.47
  -5   9  -8    7.12    0.56
   5  -9   8    7.53    0.82
  -6   9  -8    2.72    0.45
   6  -9   8    3.35    0.57
  -7   9  -8    0.76    0.42
   6   8  -8    3.60    0.80
   6   8  -8    5.81    0.83
  -6  -8   8    4.94    0.82
  -6  -8   8    5.05    0.73
   5   8  -8    0.90    0.48
   5   8  -8    0.58    0.34
  -5  -8   8   -0.01    0.47
  -5  -8   8    0.30    0.34
   4   8  -8    1.95    0.37
   4   8  -8    1.38    0.39
  -4  -8   8    0.98    0.38
  -4  -8   8    1.88    0.33
   3   8  -8    0.15    0.29
   3   8  -8    0.76    0.24
  -3  -8   8    0.48    0.24
   2   8  -8    1.13    0.24
   2   8  -8    1.29    0.22
  -2  -8   8    1.64    0.29
   1   8  -8    0.15    0.11
   1   8  -8   -0.26    0.14
  -1  -8   8    0.23    0.18
   0   8  -8   14.40    0.69
   0   8  -8   14.42    0.73
   0  -8   8   15.01    0.84
  -1   8  -8   76.16    2.90
  -1   8  -8   78.14    2.90
   1  -8   8   78.76    3.11
  -2   8  -8   18.25    0.80
  -2   8  -8   16.47    0.76
   2  -8   8   16.28    0.96
  -3   8  -8   12.41    0.64
  -3   8  -8   12.73    0.61
   3  -8   8   12.63    0.83
  -4   8  -8   11.68    0.57
  -4   8  -8   11.06    0.65
   4  -8   8   11.80    0.84
  -5   8  -8    1.81    0.30
  -5   8  -8    2.16    0.30
   5  -8   8    1.98    0.44
  -6   8  -8   -0.21    0.24
   6  -8   8   -0.90    0.44
  -7   8  -8    5.07    0.67
   7  -8   8    5.87    0.80
   6   7  -8    1.08    0.47
   6   7  -8    3.11    0.64
  -6  -7   8    1.34    0.59
  -6  -7   8    0.88    0.38
   5   7  -8   13.04    0.94
   5   7  -8   13.59    1.04
  -5  -7   8   13.07    0.81
  -5  -7   8   13.98    1.10
   4   7  -8   12.51    0.92
   4   7  -8   12.45    0.76
  -4  -7   8   12.81    0.92
  -4  -7   8   11.57    0.75
   3   7  -8    7.16    0.54
   3   7  -8    8.30    0.67
  -3  -7   8    7.09    0.53
   2   7  -8  101.56    3.74
   2   7  -8   98.53    3.83
  -2  -7   8   99.24    3.80
   1   7  -8    2.55    0.33
   1   7  -8    2.65    0.27
  -1  -7   8    3.00    0.36
   0   7  -8   18.18    0.79
   0   7  -8   17.75    0.83
   0  -7   8   17.19    0.91
  -1   7  -8   33.19    1.37
  -1   7  -8   35.43    1.38
   1  -7   8   36.39    1.37
   1  -7   8   33.52    1.55
  -2   7  -8    0.20    0.11
  -2   7  -8   -0.04    0.09
   2  -7   8    0.08    0.16
   2  -7   8    0.09    0.21
  -3   7  -8    0.32    0.12
  -3   7  -8    0.59    0.17
   3  -7   8    0.42    0.23
   3  -7   8    0.41    0.24
  -4   7  -8    9.02    0.55
  -4   7  -8    8.30    0.45
   4  -7   8    8.93    0.72
   4  -7   8    8.98    0.65
  -5   7  -8   11.69    0.58
  -5   7  -8   11.72    0.68
   5  -7   8   10.64    0.87
  -6   7  -8   10.35    0.74
   6  -7   8   10.02    1.08
  -7   7  -8    1.24    0.41
   7  -7   8    1.34    0.63
   7   6  -8   17.05    1.25
  -7  -6   8   14.99    1.41
  -7  -6   8   14.10    1.21
   6   6  -8    2.50    0.53
   6   6  -8    3.64    0.66
  -6  -6   8    2.48    0.38
  -6  -6   8    2.78    0.61
   5   6  -8    5.53    0.80
   5   6  -8    6.97    0.70
  -5  -6   8    6.97    0.77
  -5  -6   8    6.15    0.54
   4   6  -8    4.78    0.61
   4   6  -8    5.36    0.54
  -4  -6   8    4.76    0.62
  -4  -6   8    4.78    0.43
   3   6  -8    5.54    0.47
   3   6  -8    4.96    0.49
  -3  -6   8    5.64    0.44
  -3  -6   8    4.56    0.51
   2   6  -8    2.83    0.39
   2   6  -8    3.28    0.32
  -2  -6   8    3.67    0.36
   1   6  -8   14.01    0.67
   1   6  -8   13.98    0.73
  -1  -6   8   14.32    0.76
   0   6  -8    2.83    0.27
   0   6  -8    2.95    0.24
   0  -6   8    3.76    0.38
   0  -6   8    3.10    0.28
  -1   6  -8    2.12    0.23
  -1   6  -8    2.02    0.21
   1  -6   8    2.36    0.34
   1  -6   8    2.18    0.23
  -2   6  -8    6.83    0.41
  -2   6  -8    7.33    0.37
   2  -6   8    7.24    0.41
   2  -6   8    7.12    0.56
  -3   6  -8   16.32    0.81
  -3   6  -8   18.69    0.74
   3  -6   8   18.30    1.01
   3  -6   8   18.39    0.82
  -4   6  -8   10.33    0.48
  -4   6  -8    9.13    0.54
   4  -6   8    8.88    0.73
   4  -6   8   10.07    0.63
  -5   6  -8    1.12    0.18
  -5   6  -8    0.93    0.27
   5  -6   8    0.55    0.37
  -6   6  -8    0.50    0.28
  -7   6  -8   20.68    1.12
   7  -6   8   18.75    1.34
   7   5  -8   -0.16    0.48
  -7  -5   8    0.32    0.66
  -7  -5   8    0.42    0.54
   6   5  -8    1.48    0.44
  -6  -5   8    0.93    0.51
  -6  -5   8    1.60    0.39
   5   5  -8   14.53    1.02
   5   5  -8   14.31    1.04
  -5  -5   8   14.11    1.06
  -5  -5   8   13.72    0.78
   4   5  -8    4.82    0.53
   4   5  -8    4.22    0.49
  -4  -5   8    4.57    0.57
  -4  -5   8    4.07    0.40
   3   5  -8   13.75    0.80
   3   5  -8   12.60    0.71
  -3  -5   8   12.34    0.68
  -3  -5   8   13.62    0.80
   2   5  -8    8.70    0.51
   2   5  -8    9.56    0.61
  -2  -5   8    9.19    0.56
   1   5  -8    7.75    0.43
   1   5  -8    7.70    0.47
  -1  -5   8    8.25    0.52
   0   5  -8    9.49    0.48
   0   5  -8   10.31    0.53
   0  -5   8   10.29    0.48
   0  -5   8    9.70    0.60
  -1   5  -8    3.84    0.26
  -1   5  -8    3.52    0.26
   1  -5   8    3.75    0.36
   1  -5   8    3.63    0.24
  -2   5  -8   19.15    0.75
  -2   5  -8   18.27    0.81
   2  -5   8   17.86    0.96
   2  -5   8   19.82    0.77
  -3   5  -8   70.05    2.41
  -3   5  -8   62.14    2.52
   3  -5   8   64.50    2.73
   3  -5   8   70.28    2.47
  -4   5  -8    3.02    0.29
  -4   5  -8    2.85    0.31
  -4   5  -8    3.06    0.24
   4  -5   8    3.04    0.47
   4  -5   8    2.78    0.36
  -5   5  -8    4.37    0.44
  -5   5  -8    3.96    0.53
   5  -5   8    4.25    0.63
  -6   5  -8    5.23    0.51
   6  -5   8    3.32    0.92
  -7   5  -8    7.98    0.70
   7  -5   8    8.77    0.94
   7   4  -8    0.92    0.54
  -7  -4   8    1.55    0.52
  -7  -4   8    0.12    0.60
   6   4  -8    1.19    0.46
  -6  -4   8    1.43    0.54
   5   4  -8    7.46    0.70
  -5  -4   8    7.07    0.51
   4   4  -8   22.49    1.14
   4   4  -8   22.18    1.22
  -4  -4   8   21.75    1.00
  -4  -4   8   22.74    1.21
   3   4  -8    1.11    0.25
   3   4  -8    1.23    0.22
   3   4  -8    1.07    0.25
  -3  -4   8    1.24    0.29
  -3  -4   8    1.20    0.21
   2   4  -8   33.47    1.40
   2   4  -8   31.96    1.46
   2   4  -8   35.68    1.41
  -2  -4   8   34.66    1.48
  -2  -4   8   32.22    1.39
   1   4  -8   50.02    2.00
   1   4  -8   55.35    2.07
   1   4  -8   51.31    2.06
  -1  -4   8   50.66    2.07
  -1  -4   8   56.14    2.03
  -1  -4   8   52.10    2.07
   0   4  -8   29.63    1.20
   0   4  -8   32.19    1.24
   0  -4   8   32.71    1.20
   0  -4   8   28.09    1.31
  -1   4  -8    2.70    0.22
  -1   4  -8    2.61    0.21
   1  -4   8    2.77    0.33
   1  -4   8    2.96    0.19
  -2   4  -8    1.45    0.13
  -2   4  -8    1.24    0.17
   2  -4   8    1.24    0.24
   2  -4   8    1.43    0.15
  -3   4  -8    0.58    0.08
  -3   4  -8    0.37    0.13
  -3   4  -8    0.47    0.13
   3  -4   8    0.46    0.23
   3  -4   8    0.46    0.12
  -4   4  -8    0.91    0.13
  -4   4  -8    0.74    0.18
  -4   4  -8    0.81    0.18
   4  -4   8    0.74    0.30
  -5   4  -8    0.15    0.19
  -5   4  -8    0.26    0.16
   5  -4   8    0.24    0.29
  -6   4  -8    4.58    0.48
   6  -4   8    4.07    0.65
  -7   4  -8    6.09    0.65
   7  -4   8    7.85    1.03
   7   3  -8    0.71    0.48
  -7  -3   8    2.09    0.60
  -7  -3   8    0.87    0.48
   6   3  -8   33.54    1.68
  -6  -3   8   33.55    1.82
   5   3  -8   53.51    2.28
  -5  -3   8   52.49    2.40
  -5  -3   8   51.78    2.04
   4   3  -8    0.64    0.24
   4   3  -8    0.45    0.20
  -4  -3   8    0.57    0.22
  -4  -3   8    0.27    0.17
  -4  -3   8    0.28    0.26
   3   3  -8    1.52    0.25
   3   3  -8    1.33    0.26
   3   3  -8    1.75    0.26
  -3  -3   8    1.68    0.26
  -3  -3   8    1.55    0.27
   2   3  -8    1.91    0.23
   2   3  -8    2.18    0.31
   2   3  -8    2.87    0.29
  -2  -3   8    2.10    0.28
  -2  -3   8    2.18    0.29
   1   3  -8   18.69    0.84
   1   3  -8   21.04    0.91
   1   3  -8   19.67    0.92
  -1  -3   8   20.40    0.92
  -1  -3   8   18.70    0.92
  -1  -3   8   20.63    0.88
   0   3  -8   47.36    1.85
   0   3  -8   51.05    1.99
   0   3  -8   50.79    1.89
   0  -3   8   50.60    1.89
   0  -3   8   45.41    1.97
   0  -3   8   50.30    1.85
   0  -3   8   52.94    1.85
  -1   3  -8   24.62    0.93
  -1   3  -8   22.96    0.96
   1  -3   8   26.05    0.90
   1  -3   8   25.12    0.99
   1  -3   8   24.40    0.93
   1  -3   8   23.10    1.13
  -2   3  -8   27.16    1.08
   2  -3   8   26.49    1.27
  -3   3  -8   83.10    3.12
   3  -3   8   86.16    3.38
  -4   3  -8   13.20    0.52
  -4   3  -8   12.36    0.65
  -4   3  -8   12.86    0.54
   4  -3   8   12.31    0.85
  -5   3  -8   -0.15    0.15
  -5   3  -8    0.22    0.19
   5  -3   8   -0.54    0.35
  -6   3  -8    1.98    0.33
   6  -3   8    2.60    0.52
  -7   3  -8    0.73    0.39
   7  -3   8    0.76    0.55
   7   2  -8    1.70    0.51
  -7  -2   8    0.58    0.48
  -7  -2   8    0.59    0.62
   6   2  -8    0.45    0.34
  -6  -2   8    0.13    0.44
   5   2  -8    1.38    0.33
  -5  -2   8    1.15    0.22
  -5  -2   8    2.01    0.43
   4   2  -8   16.91    0.77
   4   2  -8   14.58    0.89
  -4  -2   8   16.46    0.75
  -4  -2   8   16.38    1.00
  -4  -2   8   17.16    0.77
   3   2  -8   21.21    0.87
   3   2  -8   19.37    0.96
  -3  -2   8   20.84    0.89
  -3  -2   8   19.08    1.02
   2   2  -8   26.45    1.09
   2   2  -8   25.44    1.13
  -2  -2   8   28.36    1.12
  -2  -2   8   25.37    1.19
   1   2  -8   46.80    1.89
   1   2  -8   52.12    1.95
  -1  -2   8   50.47    1.87
  -1  -2   8   49.32    1.93
  -1  -2   8   51.82    1.97
  -1  -2   8   49.85    1.96
   0   2  -8   27.91    1.21
   0  -2   8   28.00    1.07
   0  -2   8   27.39    1.07
   0  -2   8   26.29    1.20
   0  -2   8   27.61    1.09
  -1   2  -8   14.79    0.73
   1  -2   8   15.71    0.86
   1  -2   8   18.00    0.61
   1  -2   8   17.78    0.63
   1  -2   8   17.38    0.72
  -2   2  -8    0.61    0.11
   2  -2   8    0.69    0.17
   2  -2   8    0.60    0.20
  -3   2  -8    4.96    0.31
   3  -2   8    4.57    0.47
  -4   2  -8    5.32    0.28
  -4   2  -8    4.87    0.37
  -4   2  -8    5.70    0.26
   4  -2   8    4.44    0.57
  -5   2  -8   23.77    1.01
  -5   2  -8   19.72    0.98
   5  -2   8   20.43    1.21
   6  -2   8    0.39    0.45
  -7   2  -8    2.55    0.44
   7  -2   8    2.55    0.66
   7   1  -8   10.43    0.90
  -7  -1   8    9.79    0.87
  -7  -1   8   10.46    1.00
   6   1  -8    3.56    0.55
  -6  -1   8    3.70    0.54
  -6  -1   8    3.14    0.60
   5   1  -8   52.57    2.35
  -5  -1   8   57.82    2.05
  -5  -1   8   55.68    2.47
   4   1  -8    0.13    0.19
   4   1  -8    0.29    0.16
  -4  -1   8    0.10    0.24
  -4  -1   8   -0.04    0.13
  -4  -1   8    0.23    0.15
   3   1  -8    2.45    0.30
   3   1  -8    3.27    0.27
  -3  -1   8    2.93    0.40
  -3  -1   8    2.81    0.27
   2   1  -8    2.13    0.24
   2   1  -8    2.00    0.23
  -2  -1   8    1.95    0.30
  -2  -1   8    1.97    0.25
   1   1  -8   34.53    1.45
   1   1  -8   37.26    1.50
   1   1  -8   37.85    1.51
  -1  -1   8   37.33    1.51
  -1  -1   8   39.09    1.53
  -1  -1   8   37.74    1.42
  -1  -1   8   38.95    1.52
   0   1  -8   43.67    1.80
   0   1  -8   45.46    1.66
   0  -1   8   41.66    1.80
   0  -1   8   45.83    1.68
   0  -1   8   45.01    1.64
   0  -1   8   44.36    1.67
  -1   1  -8    2.29    0.18
   1  -1   8    2.44    0.33
   1  -1   8    2.73    0.21
  -2   1  -8   59.33    2.23
   2  -1   8   57.27    2.48
   2  -1   8   66.06    2.30
  -3   1  -8    9.84    0.49
   3  -1   8   10.51    0.73
  -4   1  -8   11.15    0.59
  -4   1  -8   12.49    0.49
  -4   1  -8   12.15    0.47
   4  -1   8   10.88    0.79
  -5   1  -8    3.01    0.35
   5  -1   8    3.47    0.53
  -6   1  -8    0.22    0.27
   6  -1   8    0.35    0.47
  -7   1  -8   -0.10    0.34
   7  -1   8    1.28    0.57
   7   0  -8    6.06    0.83
  -7   0   8    7.33    0.98
  -7   0   8    4.43    0.67
   6   0  -8   19.51    1.18
  -6   0   8   18.65    1.18
  -6   0   8   21.41    1.31
   5   0  -8    0.67    0.29
  -5   0   8    0.30    0.34
   4   0  -8   17.54    0.94
  -4   0   8   16.94    0.98
   3   0  -8    9.15    0.57
   3   0  -8   10.11    0.45
  -3   0   8    9.07    0.62
  -3   0   8   10.27    0.48
   2   0  -8    7.49    0.42
   2   0  -8    7.64    0.46
  -2   0   8    7.13    0.50
  -2   0   8    8.43    0.45
   1   0  -8    2.39    0.23
   1   0  -8    2.81    0.31
   1   0  -8    2.72    0.30
  -1   0   8    2.45    0.29
  -1   0   8    2.43    0.28
  -1   0   8    2.51    0.34
  -1   0   8    2.59    0.21
   0   0  -8   11.61    0.51
   0   0  -8   11.41    0.66
   0   0  -8   12.12    0.56
   0   0   8   11.52    0.66
   0   0   8   12.33    0.53
   0   0   8   11.85    0.50
   0   0   8   11.09    0.56
  -1   0  -8    2.68    0.18
   1   0   8    2.69    0.34
   1   0   8    2.37    0.13
   1   0   8    2.27    0.20
  -2   0  -8   21.18    0.84
   2   0   8   21.61    0.89
   2   0   8   19.96    1.08
  -3   0  -8  122.28    4.50
  -3   0  -8  127.96    4.59
   3   0   8  122.27    4.82
   3   0   8  129.60    4.59
  -4   0  -8   33.72    1.42
  -4   0  -8   37.68    1.36
  -4   0  -8   35.98    1.31
   4   0   8   35.21    1.74
  -5   0  -8    7.44    0.49
   5   0   8    7.59    0.92
  -6   0  -8    2.63    0.35
   6   0   8    1.84    0.55
  -7   0  -8   20.17    1.12
   7   0   8   24.35    1.53
   7  -1  -8    2.59    0.50
  -7   1   8    2.51    0.49
  -7   1   8    3.40    0.67
   6  -1  -8    9.37    0.77
  -6   1   8   10.07    0.93
  -6   1   8    9.00    0.76
   5  -1  -8   11.81    0.83
  -5   1   8   12.02    0.83
  -5   1   8   12.38    0.86
   4  -1  -8    1.32    0.28
  -4   1   8    1.27    0.29
   3  -1  -8    3.59    0.23
   3  -1  -8    3.92    0.36
  -3   1   8    4.31    0.25
  -3   1   8    3.72    0.44
   2  -1  -8    2.72    0.27
   2  -1  -8    2.92    0.28
  -2   1   8    2.95    0.27
  -2   1   8    2.21    0.32
  -2   1   8    2.55    0.29
   1  -1  -8   68.24    2.65
   1  -1  -8   67.62    2.59
   1  -1  -8   71.80    2.68
  -1   1   8   71.69    2.68
  -1   1   8   73.04    2.66
  -1   1   8   68.77    2.55
   0  -1  -8  108.72    3.82
   0  -1  -8  105.53    3.76
   0  -1  -8  105.10    3.94
   0   1   8   98.63    3.93
   0   1   8  106.15    3.78
   0   1   8  106.25    3.73
  -1  -1  -8    4.83    0.25
  -1  -1  -8    4.92    0.29
   1   1   8    4.47    0.47
   1   1   8    5.68    0.29
   1   1   8    4.84    0.24
  -2  -1  -8    0.77    0.11
  -2  -1  -8    0.67    0.10
   2   1   8    0.60    0.16
   2   1   8    0.19    0.20
  -3  -1  -8    0.13    0.11
  -3  -1  -8    0.12    0.10
  -3  -1  -8   -0.50    0.20
  -3  -1  -8    0.34    0.10
   3   1   8   -0.25    0.22
   3   1   8    0.35    0.25
  -4  -1  -8   33.21    1.26
  -4  -1  -8   30.32    1.26
   4   1   8   31.17    1.60
  -5  -1  -8    0.73    0.20
   5   1   8    0.83    0.40
   6   1   8    1.53    0.52
   7  -2  -8    4.12    0.62
  -7   2   8    4.69    0.64
  -7   2   8    6.03    0.91
   6  -2  -8    0.00    0.30
  -6   2   8   -0.68    0.34
  -6   2   8   -0.16    0.40
   5  -2  -8   23.09    1.24
  -5   2   8   22.85    1.22
  -5   2   8   24.68    1.33
   4  -2  -8    0.14    0.22
  -4   2   8    0.42    0.28
   3  -2  -8   10.22    0.43
   3  -2  -8    8.50    0.58
   3  -2  -8    9.88    0.44
  -3   2   8    9.94    0.66
  -3   2   8   10.40    0.43
   2  -2  -8    0.33    0.16
   2  -2  -8    0.19    0.13
  -2   2   8    0.24    0.12
  -2   2   8    0.42    0.16
  -2   2   8    0.30    0.17
   1  -2  -8   20.24    0.95
   1  -2  -8   20.34    0.86
   1  -2  -8   20.74    0.94
  -1   2   8   19.91    0.80
  -1   2   8   20.84    0.94
  -1   2   8   19.20    0.88
   0  -2  -8    0.06    0.15
   0  -2  -8    0.18    0.09
   0   2   8    0.14    0.07
   0   2   8    0.19    0.10
   0   2   8    0.13    0.17
  -1  -2  -8    1.54    0.13
  -1  -2  -8    1.17    0.18
   1   2   8    1.50    0.16
   1   2   8    1.02    0.23
   1   2   8    1.45    0.15
  -2  -2  -8    0.11    0.14
  -2  -2  -8    0.25    0.12
  -2  -2  -8    0.03    0.07
   2   2   8    0.24    0.11
   2   2   8    0.03    0.19
   2   2   8   -0.11    0.13
  -3  -2  -8    4.04    0.30
  -3  -2  -8    4.44    0.28
  -3  -2  -8    4.01    0.41
   3   2   8    4.15    0.50
   3   2   8    4.43    0.34
  -4  -2  -8    8.13    0.52
  -4  -2  -8    7.61    0.43
   4   2   8    7.83    0.75
  -5  -2  -8    0.15    0.18
   5   2   8    0.27    0.39
  -6  -2  -8   -0.35    0.55
   6   2   8    1.17    0.48
   7  -3  -8    4.81    0.67
  -7   3   8    2.61    0.56
  -7   3   8    3.91    0.68
   6  -3  -8    4.87    0.63
  -6   3   8    3.71    0.56
  -6   3   8    3.63    0.53
   5  -3  -8    2.05    0.39
  -5   3   8    2.43    0.40
  -5   3   8    2.34    0.40
   4  -3  -8   20.64    1.04
  -4   3   8   19.86    1.03
  -4   3   8   21.03    1.13
   3  -3  -8   12.05    0.69
   3  -3  -8   13.50    0.53
   3  -3  -8   12.87    0.53
  -3   3   8   12.20    0.69
  -3   3   8   12.54    0.75
   2  -3  -8   24.61    1.11
   2  -3  -8   27.23    1.12
  -2   3   8   27.29    1.10
  -2   3   8   26.56    1.09
  -2   3   8   25.95    1.18
   1  -3  -8   16.39    0.83
   1  -3  -8   16.31    0.71
  -1   3   8   15.73    0.75
  -1   3   8   16.50    0.65
  -1   3   8   14.86    0.78
   0  -3  -8    0.05    0.18
   0  -3  -8   -0.05    0.08
   0   3   8    0.02    0.06
   0   3   8    0.03    0.11
   0   3   8    0.00    0.16
  -1  -3  -8    2.26    0.27
  -1  -3  -8    1.30    0.12
   1   3   8    1.22    0.25
   1   3   8    1.58    0.18
  -2  -3  -8    0.54    0.08
  -2  -3  -8    0.57    0.13
  -2  -3  -8    0.68    0.17
   2   3   8    0.29    0.14
   2   3   8    0.46    0.27
  -3  -3  -8    2.73    0.35
  -3  -3  -8    2.66    0.21
  -3  -3  -8    2.89    0.33
   3   3   8    1.91    0.42
   3   3   8    2.64    0.34
  -4  -3  -8    5.46    0.34
  -4  -3  -8    5.53    0.58
  -5  -3  -8    6.83    0.79
   5   3   8    7.70    0.83
  -6  -3  -8    6.55    1.00
   6   3   8    4.80    0.76
  -7   4   8   -0.18    0.46
  -7   4   8    1.05    0.45
   6  -4  -8    8.54    0.80
  -6   4   8    8.23    0.77
  -6   4   8   10.10    0.82
   5  -4  -8    9.29    0.70
  -5   4   8    8.33    0.89
  -5   4   8    9.87    0.74
   4  -4  -8    1.05    0.26
  -4   4   8    0.65    0.25
  -4   4   8    0.28    0.26
   3  -4  -8   22.00    0.86
   3  -4  -8   21.76    0.84
   3  -4  -8   20.18    0.99
  -3   4   8   21.05    1.08
  -3   4   8   19.52    0.99
   2  -4  -8   14.23    0.71
   2  -4  -8   14.36    0.69
   2  -4  -8   12.88    0.67
  -2   4   8   13.33    0.67
  -2   4   8   13.80    0.68
  -2   4   8   13.40    0.72
  -2   4   8   14.51    0.67
   1  -4  -8   71.12    2.84
   1  -4  -8   74.90    2.68
  -1   4   8   68.51    2.78
  -1   4   8   77.43    2.68
  -1   4   8   70.86    2.75
  -1   4   8   74.31    2.62
   0  -4  -8    0.41    0.22
   0   4   8   -0.17    0.10
   0   4   8    0.11    0.19
  -1  -4  -8    5.50    0.44
   1   4   8    5.24    0.33
   1   4   8    5.92    0.51
  -2  -4  -8    5.52    0.43
   2   4   8    4.95    0.40
   2   4   8    5.44    0.55
  -3  -4  -8   11.05    0.44
   3   4   8    9.95    0.85
   3   4   8   10.72    0.59
  -4  -4  -8    0.76    0.28
  -4  -4  -8    1.03    0.46
   4   4   8    1.09    0.30
   4   4   8    1.84    0.41
  -5  -4  -8    0.32    0.42
   5   4   8   -0.18    0.43
  -6  -4  -8   -0.09    0.58
   6   4   8   -0.62    0.57
  -7   5   8    4.32    0.68
  -7   5   8    5.77    0.71
  -6   5   8    6.11    0.76
  -6   5   8    6.26    0.74
   5  -5  -8    1.34    0.33
  -5   5   8    0.78    0.33
  -5   5   8    1.78    0.42
   4  -5  -8   26.81    1.29
  -4   5   8   28.11    1.39
  -4   5   8   28.20    1.31
   3  -5  -8   36.87    1.43
   3  -5  -8   36.75    1.39
   3  -5  -8   35.25    1.53
  -3   5   8   36.07    1.53
  -3   5   8   36.47    1.63
   2  -5  -8   18.27    0.84
   2  -5  -8   17.64    1.06
   2  -5  -8   18.59    0.92
  -2   5   8   19.68    0.85
  -2   5   8   17.76    0.91
  -2   5   8   18.32    0.91
  -2   5   8   18.65    0.83
   1  -5  -8  110.33    4.30
  -1   5   8  108.60    4.28
  -1   5   8  126.08    4.13
  -1   5   8  119.16    4.08
  -1   5   8  111.28    4.24
   0  -5  -8   42.69    1.83
   0   5   8   42.28    1.66
   0   5   8   42.70    1.84
  -1  -5  -8    0.63    0.25
   1   5   8    0.35    0.20
   1   5   8    0.46    0.13
  -2  -5  -8    6.17    0.62
   2   5   8    5.29    0.40
   2   5   8    4.99    0.57
  -3  -5  -8   65.63    3.45
   3   5   8   67.85    3.48
   3   5   8   73.26    2.68
  -4  -5  -8   12.92    1.02
   4   5   8   13.11    1.04
   4   5   8   14.38    1.16
  -5  -5  -8    1.78    0.56
   5   5   8    1.23    0.53
  -7   6   8    0.47    0.53
  -7   6   8    0.14    0.50
  -6   6   8    8.10    0.79
  -6   6   8    6.07    0.76
  -5   6   8    2.29    0.41
  -5   6   8    1.62    0.42
  -4   6   8   10.86    0.75
  -4   6   8   12.03    0.73
   3  -6  -8    0.06    0.16
  -3   6   8   -0.22    0.21
  -3   6   8   -0.28    0.19
   2  -6  -8   26.63    1.18
  -2   6   8   27.66    1.17
  -2   6   8   27.32    1.24
  -2   6   8   26.57    1.12
   1  -6  -8   11.18    0.71
  -1   6   8   12.30    0.49
  -1   6   8   11.36    0.64
  -1   6   8   11.41    0.70
  -1   6   8   13.21    0.52
   0  -6  -8    1.42    0.29
   0   6   8    2.14    0.34
   0   6   8    2.08    0.26
  -1  -6  -8   27.06    1.40
   1   6   8   28.52    1.18
   1   6   8   29.59    1.43
  -2  -6  -8    1.51    0.33
   2   6   8    1.53    0.35
   2   6   8    1.88    0.26
  -3  -6  -8   -0.19    0.39
   3   6   8   -0.17    0.36
   3   6   8    0.47    0.25
  -4  -6  -8    1.47    0.47
   4   6   8    2.27    0.51
  -5  -6  -8   12.02    1.03
   5   6   8   10.28    1.11
  -7   7   8    0.73    0.58
  -7   7   8    3.16    0.62
  -6   7   8    3.03    0.51
  -6   7   8    5.19    0.70
  -5   7   8    3.73    0.50
  -5   7   8    5.69    0.65
  -4   7   8    1.45    0.30
  -4   7   8    1.68    0.37
  -3   7   8    3.61    0.41
  -3   7   8    3.57    0.45
   2  -7  -8   36.66    1.54
  -2   7   8   35.44    1.57
   1  -7  -8    6.21    0.53
  -1   7   8    6.79    0.29
  -1   7   8    5.55    0.45
  -1   7   8    6.41    0.32
   0  -7  -8   -0.34    0.24
   0   7   8   -0.30    0.24
   0   7   8    0.17    0.15
  -1  -7  -8    0.72    0.34
   1   7   8    0.50    0.29
   1   7   8    1.00    0.19
  -2  -7  -8    2.22    0.43
   2   7   8    1.43    0.40
   2   7   8    2.29    0.32
  -3  -7  -8   73.08    3.20
   3   7   8   73.76    3.21
   3   7   8   75.67    2.92
  -4  -7  -8    6.27    0.81
   4   7   8    6.87    0.78
  -5  -7  -8    1.55    0.62
   5   7   8    1.04    0.60
  -6   8   8    1.41    0.49
  -6   8   8    2.59    0.56
  -5   8   8    0.00    0.38
  -4   8   8    7.51    0.62
  -4   8   8    6.14    0.67
   3  -8  -8   21.74    1.01
  -3   8   8   22.56    1.02
   2  -8  -8   37.63    1.60
  -2   8   8   37.23    1.62
  -2   8   8   36.28    1.63
   1  -8  -8   20.30    1.07
  -1   8   8   20.27    0.98
   0  -8  -8    0.50    0.29
   0   8   8    0.76    0.19
  -1  -8  -8    0.34    0.31
   1   8   8    0.94    0.34
   1   8   8    0.38    0.19
  -2  -8  -8    0.17    0.35
   2   8   8   -0.34    0.25
   2   8   8    0.58    0.37
  -3  -8  -8   14.64    1.08
   3   8   8   13.07    1.05
   3   8   8   11.73    0.84
  -4  -8  -8    1.21    0.54
   4   8   8    1.29    0.57
  -6   9   8   23.34    1.34
  -6   9   8   24.55    1.46
  -5   9   8   -0.24    0.38
  -5   9   8    0.12    0.65
  -4   9   8    5.05    0.62
  -4   9   8    4.97    0.56
   3  -9  -8   -0.12    0.25
  -3   9   8    0.10    0.22
  -3   9   8    0.42    0.26
   2  -9  -8    0.12    0.27
   1  -9  -8    0.32    0.29
  -1   9   8    0.28    0.21
   0  -9  -8   11.55    0.85
   0   9   8    9.95    0.63
  -1  -9  -8    2.23    0.45
   1   9   8    3.04    0.43
  -2  -9  -8    4.52    0.69
   2   9   8    5.67    0.60
  -3  -9  -8    5.37    0.74
   3   9   8    6.48    0.70
  -4  -9  -8   -0.51    0.62
  -5  10   8    0.57    0.37
  -5  10   8    1.21    0.42
  -4  10   8    0.08    0.37
  -3  10   8    4.37    0.61
   2 -10  -8   19.46    1.08
  -2  10   8   20.92    1.07
   1 -10  -8    1.10    0.37
  -1  10   8    1.01    0.28
   0 -10  -8   -0.34    0.37
   0  10   8    0.40    0.27
  -1 -10  -8   -0.36    0.42
   1  10   8    0.15    0.33
  -2 -10  -8    1.03    0.49
   2  10   8   -0.64    0.35
  -3 -10  -8   14.56    1.23
  -5  11   8    1.11    0.46
  -4  11   8    2.64    0.50
  -3  11   8    5.61    0.66
   2 -11  -8    0.97    0.39
  -2  11   8    1.38    0.34
   1 -11  -8   15.88    1.07
  -1  11   8   15.86    0.90
   0 -11  -8   30.65    1.60
   0  11   8   28.18    1.37
  -1 -11  -8    0.87    0.51
   1  11   8    1.71    0.36
  -2 -11  -8   -0.57    0.51
   2  11   8   -0.05    0.42
  -4  12   8    3.28    0.55
  -3  12   8    6.59    0.70
   2 -12  -8   34.17    1.66
  -2  12   8   31.63    1.58
   1 -12  -8    0.53    0.46
  -1  12   8    0.04    0.31
   0 -12  -8    0.02    0.52
   0  12   8   -0.08    0.31
  -1 -12  -8    3.77    0.67
   1  12   8    5.36    0.74
  -2  13   8   -0.02    0.39
   1 -13  -8    4.59    0.70
  -1  13   8    3.71    0.50
   1  16  -9   16.45    1.28
   1  16  -9   16.21    1.03
  -1 -16   9   18.50    1.35
   0  16  -9    1.94    0.55
   0  16  -9    3.09    0.42
   0 -16   9    3.00    0.70
  -1  16  -9    6.42    0.79
  -1  16  -9    7.74    0.63
   1 -16   9    6.56    1.02
  -2  16  -9    6.72    0.59
  -2  16  -9    5.52    0.73
   2 -16   9    5.84    0.81
  -3  16  -9    0.78    0.34
  -3  16  -9    0.21    0.42
   3 -16   9   -0.07    0.59
   2  15  -9   50.05    2.19
   2  15  -9   50.43    2.47
  -2 -15   9   49.07    2.44
   1  15  -9    1.32    0.47
   1  15  -9    1.01    0.34
  -1 -15   9    1.48    0.53
   0  15  -9   10.90    0.72
   0  15  -9   10.18    0.89
   0 -15   9   10.53    1.02
  -1  15  -9   -0.79    0.36
  -1  15  -9    0.11    0.27
   1 -15   9   -1.02    0.48
  -2  15  -9    0.65    0.26
  -2  15  -9    0.19    0.36
   2 -15   9    0.92    0.52
  -3  15  -9    5.08    0.53
  -3  15  -9    4.52    0.62
  -4  15  -9    5.88    0.63
  -4  15  -9    6.98    0.75
   4 -15   9    5.26    0.87
   3  14  -9   21.91    1.30
   3  14  -9   23.81    1.57
  -3 -14   9   21.18    1.45
   2  14  -9   -0.36    0.36
   2  14  -9   -0.56    0.46
  -2 -14   9    0.82    0.48
   1  14  -9    5.82    0.56
   1  14  -9    5.98    0.68
  -1 -14   9    5.52    0.79
   0  14  -9    0.67    0.26
   0  14  -9   -0.19    0.34
   0 -14   9    0.11    0.43
  -1  14  -9   -0.31    0.27
  -1  14  -9   -0.22    0.24
   1 -14   9   -0.41    0.39
  -2  14  -9    4.83    0.60
  -2  14  -9    6.12    0.51
   2 -14   9    4.39    0.63
  -3  14  -9    0.07    0.29
  -3  14  -9    0.02    0.26
   3 -14   9    0.71    0.49
  -4  14  -9   11.84    0.79
  -4  14  -9   13.29    0.82
   4 -14   9   11.54    1.14
   4  13  -9   -0.44    0.53
   4  13  -9   -0.17    0.49
  -4 -13   9   -0.86    0.50
   3  13  -9   11.03    1.07
   3  13  -9   10.04    0.85
  -3 -13   9    7.75    0.94
   2  13  -9    5.55    0.59
   2  13  -9    5.53    0.78
  -2 -13   9    7.24    0.78
   1  13  -9   11.69    0.74
   1  13  -9   11.02    0.89
  -1 -13   9   13.59    0.96
   0  13  -9    7.73    0.65
   0  13  -9    9.18    0.59
   0 -13   9    8.80    0.78
  -1  13  -9    0.21    0.31
  -1  13  -9    1.16    0.23
   1 -13   9    0.92    0.40
  -2  13  -9    0.77    0.29
  -2  13  -9    1.09    0.25
   2 -13   9    0.91    0.38
  -3  13  -9   11.08    0.70
  -3  13  -9   11.80    0.76
   3 -13   9   11.50    0.97
  -4  13  -9    2.31    0.43
  -4  13  -9    2.19    0.33
   4 -13   9    2.35    0.57
  -5  13  -9   -0.26    0.31
  -5  13  -9    0.03    0.32
   5 -13   9    0.50    0.61
   4  12  -9    3.76    0.57
   4  12  -9    4.01    0.70
  -4 -12   9    3.75    0.59
   3  12  -9    1.28    0.45
   3  12  -9    1.36    0.37
  -3 -12   9    0.75    0.36
   2  12  -9    2.43    0.35
   2  12  -9    2.07    0.46
  -2 -12   9    2.66    0.48
   1  12  -9    0.19    0.23
   1  12  -9   -0.37    0.29
  -1 -12   9    0.12    0.32
   0  12  -9    1.45    0.24
   0  12  -9    1.43    0.31
   0 -12   9    1.64    0.40
  -1  12  -9    3.78    0.39
  -1  12  -9    3.63    0.46
   1 -12   9    4.25    0.60
  -2  12  -9    6.01    0.51
  -2  12  -9    6.10    0.47
   2 -12   9    6.61    0.72
  -3  12  -9   21.16    1.01
  -3  12  -9   20.96    1.02
   3 -12   9   20.49    1.29
  -4  12  -9    6.93    0.56
  -4  12  -9    6.50    0.55
   4 -12   9    6.90    0.90
  -5  12  -9    2.11    0.33
  -5  12  -9    2.45    0.36
   5 -12   9    2.61    0.59
   5  11  -9    9.94    1.03
   5  11  -9    9.81    1.14
  -5 -11   9    9.71    0.99
  -5 -11   9   10.92    1.19
   4  11  -9   10.93    0.90
   4  11  -9   13.85    1.14
  -4 -11   9   11.96    0.95
   3  11  -9    8.78    0.85
   3  11  -9    9.53    0.72
  -3 -11   9    7.95    0.75
   2  11  -9    1.35    0.32
   2  11  -9    1.05    0.27
  -2 -11   9    0.56    0.31
   1  11  -9   19.17    1.07
   1  11  -9   19.99    0.98
  -1 -11   9   21.31    1.17
   0  11  -9    2.04    0.29
   0  11  -9    1.36    0.31
   0 -11   9    2.13    0.39
  -1  11  -9    2.96    0.32
  -1  11  -9    2.32    0.35
   1 -11   9    2.89    0.47
  -2  11  -9    3.38    0.35
  -2  11  -9    3.72    0.39
   2 -11   9    3.51    0.54
  -3  11  -9    5.98    0.45
  -3  11  -9    6.23    0.45
   3 -11   9    5.63    0.71
  -4  11  -9    5.41    0.45
  -4  11  -9    4.80    0.43
   4 -11   9    5.86    0.75
  -5  11  -9    1.83    0.33
  -5  11  -9    1.99    0.30
   5 -11   9    1.92    0.53
  -6  11  -9    0.56    0.36
   6 -11   9    1.23    0.60
   5  10  -9   22.92    1.35
   5  10  -9   21.54    1.44
  -5 -10   9   22.54    1.45
  -5 -10   9   22.92    1.33
   4  10  -9    0.93    0.33
   4  10  -9    0.84    0.50
  -4 -10   9    1.00    0.37
   3  10  -9    8.88    0.80
  -3 -10   9    7.53    0.79
   2  10  -9    5.14    0.48
   2  10  -9    6.25    0.57
  -2 -10   9    5.71    0.59
   1  10  -9    0.45    0.19
   1  10  -9    0.71    0.26
  -1 -10   9    0.54    0.30
   0  10  -9    5.80    0.40
   0  10  -9    5.49    0.49
   0 -10   9    6.70    0.61
  -1  10  -9   98.45    3.74
  -1  10  -9   99.12    3.69
   1 -10   9  100.44    3.95
  -2  10  -9   25.91    1.16
  -2  10  -9   26.47    1.15
   2 -10   9   26.70    1.39
  -3  10  -9   11.81    0.66
  -3  10  -9   12.20    0.64
   3 -10   9   12.98    0.93
  -4  10  -9    5.87    0.49
  -4  10  -9    5.60    0.42
   4 -10   9    5.96    0.76
  -5  10  -9    0.30    0.25
   5 -10   9   -0.31    0.46
  -6  10  -9    0.34    0.34
   6 -10   9   -0.80    0.52
   6   9  -9   -0.81    0.71
   6   9  -9   -0.19    0.49
  -6  -9   9    0.62    0.65
  -6  -9   9   -0.05    0.47
   5   9  -9   -0.87    0.41
   5   9  -9   -0.60    0.49
  -5  -9   9   -0.23    0.37
  -5  -9   9   -0.28    0.51
   4   9  -9    4.57    0.67
   4   9  -9    5.51    0.59
  -4  -9   9    4.50    0.57
  -4  -9   9    3.71    0.66
   3   9  -9   13.95    1.13
   3   9  -9   16.36    0.89
  -3  -9   9   15.79    0.93
   2   9  -9    0.36    0.20
   2   9  -9    0.64    0.25
  -2  -9   9    0.50    0.27
   1   9  -9   55.44    2.18
   1   9  -9   56.00    2.28
  -1  -9   9   54.61    2.34
   0   9  -9   54.12    2.22
   0   9  -9   57.35    2.17
   0  -9   9   55.34    2.36
  -1   9  -9   48.04    1.85
  -1   9  -9   45.69    1.87
   1  -9   9   46.96    2.08
  -2   9  -9  179.09    6.34
  -2   9  -9  172.13    6.31
   2  -9   9  174.73    6.60
  -3   9  -9    1.60    0.24
  -3   9  -9    1.02    0.22
   3  -9   9    1.26    0.33
  -4   9  -9    0.05    0.17
  -4   9  -9    0.01    0.15
   4  -9   9   -0.17    0.34
  -5   9  -9    7.97    0.49
  -5   9  -9    7.58    0.56
   5  -9   9    8.31    0.88
  -6   9  -9    7.95    0.62
   6  -9   9    6.75    0.97
   6   8  -9    2.80    0.65
   6   8  -9    1.94    0.51
  -6  -8   9    1.94    0.64
  -6  -8   9    1.07    0.46
   5   8  -9    3.87    0.55
   5   8  -9    2.61    0.54
  -5  -8   9    3.13    0.60
  -5  -8   9    3.54    0.47
   4   8  -9    5.77    0.75
   4   8  -9    6.65    0.64
  -4  -8   9    6.35    0.75
  -4  -8   9    5.50    0.57
   3   8  -9    0.29    0.27
   3   8  -9    0.07    0.20
  -3  -8   9    0.20    0.23
   2   8  -9   11.68    0.66
   2   8  -9   12.22    0.78
  -2  -8   9   11.80    0.72
   1   8  -9   18.03    0.85
   1   8  -9   16.89    0.89
  -1  -8   9   18.15    0.97
   0   8  -9    0.55    0.16
   0   8  -9    0.59    0.13
   0  -8   9    0.46    0.19
  -1   8  -9   89.63    3.25
  -1   8  -9   84.11    3.25
   1  -8   9   88.87    3.49
  -2   8  -9   32.25    1.31
  -2   8  -9   32.79    1.34
   2  -8   9   32.50    1.55
  -3   8  -9    1.15    0.19
  -3   8  -9    1.43    0.20
   3  -8   9    1.03    0.32
  -4   8  -9    0.61    0.15
  -4   8  -9    0.55    0.19
   4  -8   9    0.78    0.37
  -5   8  -9   11.86    0.74
  -5   8  -9   12.30    0.61
   5  -8   9   11.98    1.08
  -6   8  -9    0.83    0.32
   6  -8   9    0.35    0.47
  -7   8  -9    0.10    0.38
   6   7  -9    3.66    0.70
   6   7  -9    3.10    0.52
  -6  -7   9    2.19    0.63
   5   7  -9    2.49    0.45
   5   7  -9    2.73    0.55
  -5  -7   9    1.89    0.36
  -5  -7   9    3.30    0.55
   4   7  -9   11.73    0.81
  -4  -7   9   12.07    0.75
   3   7  -9    5.43    0.57
   3   7  -9    6.13    0.51
  -3  -7   9    4.90    0.61
  -3  -7   9    6.19    0.51
   2   7  -9   -0.22    0.20
   2   7  -9    0.04    0.16
  -2  -7   9    0.05    0.20
   1   7  -9    0.09    0.12
   1   7  -9    0.38    0.18
  -1  -7   9    0.03    0.16
   0   7  -9   62.28    2.30
   0   7  -9   59.92    2.34
   0  -7   9   59.14    2.47
  -1   7  -9    2.41    0.25
  -1   7  -9    3.06    0.25
   1  -7   9    2.48    0.37
   1  -7   9    2.51    0.29
  -2   7  -9   26.96    1.14
   2  -7   9   26.92    1.35
   2  -7   9   27.45    1.12
  -3   7  -9    2.29    0.23
  -3   7  -9    2.14    0.24
   3  -7   9    2.56    0.42
   3  -7   9    3.18    0.38
  -4   7  -9   10.28    0.54
  -4   7  -9   11.77    0.64
   4  -7   9    9.76    0.76
  -5   7  -9   11.34    0.70
  -5   7  -9   11.25    0.72
   5  -7   9   12.02    0.94
  -6   7  -9   -0.01    0.29
   6  -7   9    0.81    0.49
  -7   7  -9    1.75    0.41
   7  -7   9    1.28    0.65
   6   6  -9    0.36    0.47
  -6  -6   9   -0.30    0.55
   5   6  -9    1.56    0.38
   5   6  -9    1.69    0.44
  -5  -6   9    1.78    0.32
  -5  -6   9    1.26    0.46
   4   6  -9    2.51    0.42
   4   6  -9    2.88    0.39
  -4  -6   9    4.22    0.53
  -4  -6   9    3.11    0.42
   3   6  -9   14.89    0.81
   3   6  -9   14.81    0.89
  -3  -6   9   14.62    0.80
  -3  -6   9   14.81    0.89
   2   6  -9   17.76    0.95
   2   6  -9   18.78    0.90
  -2  -6   9   18.75    0.93
   1   6  -9    9.69    0.59
   1   6  -9   10.30    0.54
  -1  -6   9   10.32    0.64
   0   6  -9    9.23    0.51
   0   6  -9    9.33    0.48
   0  -6   9    9.10    0.62
   0  -6   9    9.58    0.49
  -1   6  -9   38.90    1.49
  -1   6  -9   36.93    1.49
   1  -6   9   39.92    1.45
   1  -6   9   35.89    1.66
  -2   6  -9    4.48    0.31
  -2   6  -9    4.89    0.30
   2  -6   9    4.93    0.33
   2  -6   9    4.06    0.43
  -3   6  -9    5.30    0.37
  -3   6  -9    5.25    0.29
   3  -6   9    5.11    0.39
   3  -6   9    4.65    0.53
  -4   6  -9    0.91    0.20
   4  -6   9    0.96    0.33
  -5   6  -9    2.64    0.40
   5  -6   9    1.76    0.44
  -6   6  -9   13.63    0.79
   6  -6   9   13.00    1.06
  -7   6  -9    1.06    0.38
   7  -6   9    0.44    0.66
   7   5  -9    7.92    1.00
  -7  -5   9    4.79    0.79
   6   5  -9    0.27    0.41
  -6  -5   9    0.75    0.53
   5   5  -9    1.00    0.35
   5   5  -9    0.40    0.37
  -5  -5   9    0.33    0.24
  -5  -5   9    0.06    0.37
   4   5  -9   35.72    1.76
   4   5  -9   34.62    1.63
  -4  -5   9   37.20    1.76
  -4  -5   9   35.53    1.52
   3   5  -9    7.59    0.64
   3   5  -9    7.27    0.54
  -3  -5   9    7.75    0.61
  -3  -5   9    7.60    0.51
   2   5  -9   15.62    0.85
   2   5  -9   15.36    0.78
  -2  -5   9   15.30    0.79
  -2  -5   9   15.74    0.86
   1   5  -9   28.52    1.18
   1   5  -9   28.18    1.24
  -1  -5   9   28.20    1.27
   0   5  -9    7.56    0.45
   0   5  -9    7.00    0.40
   0  -5   9    6.71    0.52
   0  -5   9    7.88    0.41
  -1   5  -9    1.07    0.16
  -1   5  -9    1.23    0.18
   1  -5   9    1.43    0.17
   1  -5   9    1.24    0.24
  -2   5  -9   16.49    0.65
  -2   5  -9   15.78    0.72
   2  -5   9   14.05    0.87
   2  -5   9   16.93    0.66
  -3   5  -9   24.75    0.92
  -3   5  -9   23.84    1.04
   3  -5   9   25.35    0.97
   3  -5   9   23.43    1.25
  -4   5  -9    1.57    0.17
  -4   5  -9    1.17    0.32
  -4   5  -9    1.32    0.22
   4  -5   9    1.14    0.35
  -5   5  -9    2.24    0.32
   5  -5   9    2.52    0.45
  -6   5  -9    0.84    0.28
   6  -5   9    0.25    0.48
  -7   5  -9   -0.16    0.36
   7  -5   9    0.84    0.63
   7   4  -9   27.67    1.61
  -7  -4   9   25.49    1.57
  -7  -4   9   22.30    1.58
   6   4  -9    5.05    0.66
  -6  -4   9    4.24    0.70
   5   4  -9    0.77    0.30
  -5  -4   9    0.85    0.24
  -5  -4   9    0.34    0.38
   4   4  -9    5.93    0.65
   4   4  -9    5.62    0.51
  -4  -4   9    5.45    0.43
  -4  -4   9    5.31    0.62
   3   4  -9   84.52    3.30
   3   4  -9   85.97    3.40
  -3  -4   9   89.03    3.42
  -3  -4   9   83.94    3.24
   2   4  -9    1.06    0.17
   2   4  -9    1.34    0.25
  -2  -4   9    1.32    0.21
  -2  -4   9    1.33    0.26
   1   4  -9   11.07    0.57
   1   4  -9   11.77    0.64
  -1  -4   9   12.37    0.63
  -1  -4   9   11.32    0.65
  -1  -4   9   12.01    0.64
   0   4  -9    0.71    0.16
   0   4  -9    0.45    0.09
   0  -4   9    0.60    0.18
   0  -4   9    0.71    0.16
   0  -4   9    0.78    0.14
  -1   4  -9    0.93    0.14
  -1   4  -9    0.73    0.14
   1  -4   9    0.62    0.19
  -2   4  -9    0.89    0.13
  -2   4  -9    0.96    0.11
   2  -4   9    0.82    0.22
  -3   4  -9    3.36    0.28
   3  -4   9    3.03    0.44
  -4   4  -9    2.20    0.29
   4  -4   9    2.71    0.44
  -5   4  -9    7.42    0.53
   5  -4   9    7.27    0.77
  -6   4  -9    2.54    0.36
   6  -4   9    2.52    0.56
  -7   4  -9    2.05    0.43
   7  -4   9    1.38    0.63
   7   3  -9    4.25    0.69
  -7  -3   9    4.55    0.67
  -7  -3   9    5.22    0.76
   6   3  -9   -0.57    0.39
  -6  -3   9   -0.02    0.48
  -5  -3   9    0.66    0.20
   4   3  -9   16.98    0.91
   4   3  -9   17.00    0.82
  -4  -3   9   15.75    0.98
  -4  -3   9   14.94    0.77
   3   3  -9   46.92    1.75
   3   3  -9   43.10    1.83
  -3  -3   9   43.52    1.92
  -3  -3   9   42.50    1.75
   2   3  -9   54.65    2.03
   2   3  -9   49.29    2.04
   2   3  -9   53.53    2.13
  -2  -3   9   50.04    2.04
  -2  -3   9   52.25    2.12
   1   3  -9    8.87    0.55
   1   3  -9    8.97    0.52
   1   3  -9    9.07    0.47
  -1  -3   9    9.27    0.53
  -1  -3   9    8.60    0.54
  -1  -3   9    8.90    0.52
   0   3  -9   22.49    0.93
   0   3  -9   20.64    0.90
   0  -3   9   20.70    1.03
   0  -3   9   24.08    0.90
   0  -3   9   22.09    0.93
  -1   3  -9    6.57    0.36
   1  -3   9    6.02    0.49
   1  -3   9    6.83    0.33
   1  -3   9    7.33    0.29
  -2   3  -9   40.23    1.54
   2  -3   9   40.00    1.78
  -3   3  -9    9.43    0.50
   3  -3   9   10.38    0.72
  -4   3  -9    1.87    0.23
   4  -3   9    1.15    0.37
  -5   3  -9    0.07    0.19
   5  -3   9    0.23    0.35
  -6   3  -9    0.12    0.27
   6  -3   9    0.68    0.49
  -7   3  -9    0.14    0.35
   7  -3   9   -0.48    0.58
   7   2  -9   19.02    1.27
  -7  -2   9   19.20    1.25
  -7  -2   9   20.99    1.40
   6   2  -9   27.22    1.49
  -6  -2   9   27.20    1.56
   5   2  -9   50.01    2.23
  -5  -2   9   51.73    1.92
  -5  -2   9   47.06    2.27
   4   2  -9   27.09    1.11
   4   2  -9   25.09    1.27
  -4  -2   9   25.40    1.36
  -4  -2   9   26.97    1.11
   3   2  -9   77.95    3.16
   3   2  -9   85.50    3.04
  -3  -2   9   82.51    3.27
  -3  -2   9   83.14    3.07
   2   2  -9   38.81    1.49
   2   2  -9   35.10    1.51
  -2  -2   9   38.05    1.52
  -2  -2   9   36.09    1.58
   1   2  -9    4.98    0.33
   1   2  -9    5.98    0.43
  -1  -2   9    5.95    0.42
  -1  -2   9    5.40    0.41
  -1  -2   9    4.67    0.38
   0   2  -9    8.38    0.44
   0  -2   9    9.86    0.46
   0  -2   9    9.80    0.45
   0  -2   9    9.41    0.48
   0  -2   9    8.64    0.56
  -1   2  -9   25.69    1.05
   1  -2   9   27.12    1.08
   1  -2   9   26.59    1.27
   1  -2   9   28.32    0.98
  -2   2  -9    0.82    0.13
   2  -2   9    0.51    0.21
  -3   2  -9   34.24    1.37
   3  -2   9   35.81    1.67
  -4   2  -9   11.50    0.59
   4  -2   9   11.17    0.82
  -5   2  -9    3.91    0.39
  -6   2  -9    1.80    0.33
   6  -2   9    1.90    0.54
  -7   2  -9    2.80    0.45
   7  -2   9    2.98    0.70
   7   1  -9    3.01    0.57
  -7  -1   9    2.32    0.55
  -7  -1   9    2.34    0.63
   6   1  -9    7.30    0.69
  -6  -1   9    6.84    0.70
  -6  -1   9    7.40    0.87
   5   1  -9   12.16    0.83
  -5  -1   9   10.68    0.91
   4   1  -9   10.82    0.53
   4   1  -9   10.39    0.71
  -4  -1   9   10.55    0.76
  -4  -1   9   10.89    0.55
  -4  -1   9   11.21    0.54
   3   1  -9    1.29    0.23
   3   1  -9    1.91    0.26
  -3  -1   9    1.31    0.28
  -3  -1   9    1.57    0.22
   2   1  -9   24.39    1.02
   2   1  -9   22.95    1.05
  -2  -1   9   24.95    1.06
  -2  -1   9   23.66    1.11
   1   1  -9  145.80    5.54
   1   1  -9  160.62    5.61
   1   1  -9  157.23    5.59
  -1  -1   9  160.53    5.59
  -1  -1   9  159.14    5.61
  -1  -1   9  152.99    5.49
  -1  -1   9  143.81    5.64
   0   1  -9    5.45    0.37
   0  -1   9    6.87    0.37
   0  -1   9    6.59    0.34
   0  -1   9    6.44    0.47
   0  -1   9    6.97    0.39
   1  -1   9   49.16    2.12
   1  -1   9   53.00    1.91
  -2   1  -9    8.38    0.41
   2  -1   9    9.21    0.51
   2  -1   9    8.03    0.60
  -3   1  -9    3.03    0.25
   3  -1   9    3.50    0.51
  -4   1  -9   50.12    1.98
   4  -1   9   53.34    2.35
  -5   1  -9    0.03    0.20
   5  -1   9    0.30    0.35
   6  -1   9    2.21    0.52
  -7   1  -9    3.16    0.46
   7  -1   9    4.05    0.75
   7   0  -9    0.92    0.47
  -7   0   9    1.86    0.63
  -7   0   9    1.25    0.47
   6   0  -9    2.16    0.42
  -6   0   9    2.75    0.53
  -6   0   9    3.17    0.44
   5   0  -9    4.38    0.56
  -5   0   9    4.05    0.59
   4   0  -9    0.26    0.22
  -4   0   9    0.51    0.27
   3   0  -9    0.76    0.19
   3   0  -9    0.39    0.13
  -3   0   9    0.83    0.24
  -3   0   9    0.80    0.17
   2   0  -9   12.00    0.65
   2   0  -9   13.42    0.64
  -2   0   9   12.33    0.72
  -2   0   9   14.02    0.67
   1   0  -9   13.80    0.73
   1   0  -9   13.55    0.71
   1   0  -9   13.16    0.63
  -1   0   9   13.41    0.77
  -1   0   9   14.39    0.61
  -1   0   9   15.01    0.73
  -1   0   9   13.32    0.81
   0   0  -9    1.61    0.21
   0   0  -9    1.51    0.18
   0   0   9    1.24    0.24
   0   0   9    1.61    0.21
   0   0   9    1.89    0.18
   0   0   9    1.75    0.21
  -1   0  -9   41.89    1.52
  -1   0  -9   41.71    1.54
   1   0   9   43.09    1.52
   1   0   9   40.77    1.49
   1   0   9   42.23    1.56
   1   0   9   39.25    1.78
   2   0   9   18.17    0.80
   2   0   9   17.86    1.02
  -3   0  -9    0.09    0.10
   3   0   9    0.40    0.25
  -4   0  -9   38.26    1.53
   4   0   9   40.22    1.90
  -5   0  -9    5.90    0.43
   5   0   9    4.54    0.64
  -6   0  -9    1.63    0.30
   6   0   9    1.14    0.56
   7  -1  -9    3.64    0.63
  -7   1   9    3.09    0.70
  -7   1   9    3.31    0.55
   6  -1  -9    9.66    0.83
  -6   1   9    7.64    0.79
  -6   1   9   10.78    0.95
   5  -1  -9    9.16    0.69
  -5   1   9    8.84    0.69
  -5   1   9    9.77    0.82
   4  -1  -9    8.74    0.63
  -4   1   9    8.33    0.71
   3  -1  -9    0.79    0.22
   3  -1  -9    0.94    0.14
  -3   1   9    1.33    0.17
  -3   1   9    0.94    0.28
   2  -1  -9   20.65    0.96
   2  -1  -9   22.42    0.95
  -2   1   9   20.55    1.01
  -2   1   9   22.81    0.96
   1  -1  -9   33.82    1.42
   1  -1  -9   34.17    1.42
  -1   1   9   34.02    1.28
  -1   1   9   31.80    1.41
  -1   1   9   34.18    1.38
   0  -1  -9    8.14    0.48
   0  -1  -9    8.15    0.40
   0   1   9    7.87    0.37
   0   1   9    6.76    0.52
   0   1   9    8.54    0.42
  -1  -1  -9    5.51    0.33
  -1  -1  -9    5.34    0.28
   1   1   9    5.74    0.31
   1   1   9    5.46    0.26
   1   1   9    4.32    0.44
  -2  -1  -9   39.11    1.43
   2   1   9   39.10    1.49
   2   1   9   36.83    1.76
  -3  -1  -9   15.32    0.77
  -3  -1  -9   14.63    0.64
   3   1   9   15.14    0.98
   3   1   9   15.27    0.77
  -4  -1  -9    0.00    0.13
   4   1   9    0.21    0.30
  -5  -1  -9   44.45    1.76
   5   1   9   44.34    2.19
   6   1   9   13.27    1.17
   7  -2  -9   22.14    1.29
  -7   2   9   21.28    1.35
  -7   2   9   20.33    1.48
   6  -2  -9   20.03    1.20
  -6   2   9   20.97    1.32
  -6   2   9   20.13    1.17
   5  -2  -9   -0.46    0.28
  -5   2   9   -0.38    0.29
   4  -2  -9    0.76    0.25
  -4   2   9    0.19    0.28
   3  -2  -9    0.50    0.12
   3  -2  -9    0.58    0.20
  -3   2   9    0.11    0.22
  -3   2   9    0.56    0.13
   2  -2  -9    7.19    0.47
   2  -2  -9    6.49    0.44
  -2   2   9    7.50    0.51
  -2   2   9    7.03    0.45
   1  -2  -9   49.43    1.84
   1  -2  -9   47.25    1.93
   1  -2  -9   48.60    1.95
  -1   2   9   46.83    1.87
  -1   2   9   46.86    1.93
  -1   2   9   48.44    1.77
   0  -2  -9   44.50    1.63
   0  -2  -9   43.23    1.72
   0   2   9   44.66    1.66
   0   2   9   44.01    1.58
   0   2   9   40.38    1.82
  -1  -2  -9   -0.16    0.15
  -1  -2  -9    0.19    0.08
   1   2   9    0.14    0.10
   1   2   9    0.13    0.09
   1   2   9    0.14    0.22
  -2  -2  -9    1.57    0.20
  -2  -2  -9    1.76    0.24
  -2  -2  -9    1.50    0.16
   2   2   9    1.94    0.21
   2   2   9    1.72    0.20
   2   2   9    1.37    0.32
  -3  -2  -9    1.80    0.28
  -3  -2  -9    1.23    0.19
  -3  -2  -9    1.36    0.16
  -3  -2  -9    1.22    0.18
   3   2   9    1.19    0.28
   3   2   9    1.53    0.20
   3   2   9    1.02    0.33
  -4  -2  -9    2.66    0.26
   4   2   9    2.24    0.57
  -5  -2  -9    2.65    0.34
   5   2   9    3.48    0.61
   6   2   9    5.26    0.78
   7  -3  -9    2.56    0.59
  -7   3   9    1.98    0.65
  -7   3   9    2.78    0.56
   6  -3  -9    0.84    0.41
  -6   3   9    1.08    0.42
  -6   3   9    0.30    0.43
   5  -3  -9   12.69    0.88
  -5   3   9   14.59    0.90
  -5   3   9   13.09    0.92
   4  -3  -9    0.25    0.23
  -4   3   9    0.32    0.24
  -4   3   9    0.15    0.25
   3  -3  -9   12.18    0.53
   3  -3  -9   10.70    0.64
   3  -3  -9   11.06    0.52
  -3   3   9   10.84    0.69
   2  -3  -9    2.38    0.30
   2  -3  -9    2.02    0.29
  -2   3   9    2.48    0.31
  -2   3   9    2.46    0.34
  -2   3   9    2.26    0.34
   1  -3  -9   11.52    0.56
  -1   3   9   10.55    0.65
  -1   3   9   11.65    0.60
  -1   3   9   11.04    0.49
   0  -3  -9    2.89    0.23
   0  -3  -9    2.50    0.33
   0   3   9    3.08    0.37
   0   3   9    2.96    0.18
   0   3   9    2.79    0.25
  -1  -3  -9    3.49    0.20
  -1  -3  -9    3.19    0.36
   1   3   9    3.61    0.22
   1   3   9    3.10    0.39
   1   3   9    3.69    0.26
  -2  -3  -9    1.32    0.21
  -2  -3  -9    0.82    0.15
  -2  -3  -9    0.83    0.10
   2   3   9    0.74    0.31
   2   3   9    0.68    0.16
  -3  -3  -9    6.30    0.32
   3   3   9    5.46    0.67
   3   3   9    6.96    0.46
  -4  -3  -9    9.95    0.51
   4   3   9   11.15    0.92
   5   3   9   28.56    1.61
  -6  -3  -9    6.46    1.00
   7  -4  -9   15.40    1.18
  -7   4   9   16.46    1.11
  -7   4   9   15.53    1.25
   6  -4  -9    6.78    0.79
  -6   4   9    8.13    0.76
  -6   4   9    7.91    0.79
   5  -4  -9    6.56    0.59
  -5   4   9    8.18    0.69
  -5   4   9    7.04    0.71
   4  -4  -9    1.25    0.27
  -4   4   9    0.79    0.30
  -4   4   9    1.22    0.27
   3  -4  -9   32.64    1.24
   3  -4  -9   32.64    1.26
   3  -4  -9   29.93    1.38
  -3   4   9   31.72    1.47
  -3   4   9   32.24    1.40
   2  -4  -9   42.28    1.68
   2  -4  -9   38.85    1.61
  -2   4   9   40.06    1.58
  -2   4   9   40.28    1.70
  -2   4   9   40.85    1.63
   1  -4  -9   24.09    0.94
  -1   4   9   21.50    0.99
  -1   4   9   22.33    0.87
  -1   4   9   23.18    0.94
  -1   4   9   20.84    1.05
   0  -4  -9   19.75    0.72
   0   4   9   18.30    0.70
   0   4   9   19.88    0.72
   0   4   9   16.89    0.80
   0   4   9   17.44    0.97
  -1  -4  -9   10.98    0.63
   1   4   9   10.34    0.51
   1   4   9   10.94    0.76
  -2  -4  -9    3.68    0.41
   2   4   9    3.54    0.35
   2   4   9    4.41    0.56
   3   4   9    4.43    0.73
   3   4   9    6.66    0.46
  -4  -4  -9    0.36    0.46
   4   4   9    2.34    0.47
  -5  -4  -9    5.46    0.84
   5   4   9    1.52    0.60
  -7   5   9    7.08    1.00
  -7   5   9    8.21    0.88
  -6   5   9    0.78    0.45
  -6   5   9    2.19    0.48
   5  -5  -9   21.79    1.18
  -5   5   9   22.16    1.25
  -5   5   9   22.73    1.21
   4  -5  -9   12.63    0.82
  -4   5   9   14.58    0.83
  -4   5   9   14.49    0.89
   3  -5  -9    0.26    0.16
   3  -5  -9    0.19    0.20
  -3   5   9    0.07    0.23
  -3   5   9    0.32    0.21
   2  -5  -9    7.45    0.60
   2  -5  -9    8.14    0.53
   2  -5  -9    7.98    0.48
  -2   5   9    8.04    0.54
  -2   5   9    6.74    0.48
  -2   5   9    7.72    0.46
  -2   5   9    7.61    0.47
   1  -5  -9   15.18    0.88
  -1   5   9   15.68    0.86
  -1   5   9   16.60    0.81
  -1   5   9   17.93    0.72
  -1   5   9   17.28    0.66
   0  -5  -9    5.73    0.53
   0   5   9    5.28    0.35
   0   5   9    4.86    0.50
  -1  -5  -9    7.20    0.66
   1   5   9    7.22    0.59
   1   5   9    7.00    0.40
  -2  -5  -9   68.22    2.88
   2   5   9   65.70    2.85
   2   5   9   66.82    2.53
  -3  -5  -9    9.52    0.87
   3   5   9    9.72    0.60
   3   5   9    8.63    0.85
  -4  -5  -9    9.70    0.95
   4   5   9    8.36    0.91
  -5  -5  -9   14.19    1.29
   5   5   9   15.69    1.29
  -7   6   9    1.32    0.56
  -7   6   9   -0.25    0.52
  -6   6   9    0.71    0.48
  -6   6   9    0.46    0.44
  -5   6   9    2.19    0.39
  -5   6   9    1.59    0.45
  -4   6   9    8.57    0.82
  -4   6   9    9.34    0.68
   3  -6  -9   11.62    0.61
  -3   6   9   11.01    0.75
  -3   6   9   11.41    0.68
   2  -6  -9   36.15    1.56
  -2   6   9   37.35    1.47
  -2   6   9   37.19    1.45
  -2   6   9   36.17    1.58
   1  -6  -9   34.38    1.60
  -1   6   9   40.26    1.38
  -1   6   9   35.47    1.53
  -1   6   9   38.12    1.34
  -1   6   9   35.51    1.62
   0  -6  -9   57.22    2.36
   0   6   9   55.21    2.34
   0   6   9   54.15    2.13
  -1  -6  -9    1.57    0.36
   1   6   9    2.63    0.44
   1   6   9    2.66    0.29
   2   6   9   22.96    1.03
  -3  -6  -9   20.78    1.32
   3   6   9   20.58    1.02
   3   6   9   21.22    1.35
  -4  -6  -9    0.22    0.46
   4   6   9   -0.33    0.45
  -5  -6  -9    1.89    0.62
   5   6   9    0.98    0.63
  -6   7   9    3.57    0.63
  -6   7   9    2.57    0.56
  -5   7   9    0.35    0.35
  -4   7   9   10.56    0.81
  -4   7   9    8.65    0.69
   3  -7  -9    2.95    0.37
  -3   7   9    3.86    0.43
  -3   7   9    2.70    0.43
   2  -7  -9    3.96    0.49
  -2   7   9    4.41    0.45
   1  -7  -9    1.00    0.30
  -1   7   9    0.76    0.21
  -1   7   9    0.22    0.23
   0  -7  -9   20.85    1.17
   0   7   9   20.86    1.13
   0   7   9   20.57    0.94
  -1  -7  -9   22.16    1.24
   1   7   9   21.76    0.99
   1   7   9   22.20    1.26
  -2  -7  -9   34.95    1.77
   2   7   9   34.53    1.48
   2   7   9   34.49    1.79
  -3  -7  -9    4.48    0.66
   3   7   9    3.61    0.60
  -4  -7  -9    0.85    0.57
   4   7   9   -0.46    0.53
  -6   8   9    5.57    0.72
  -6   8   9    4.51    0.62
  -5   8   9    0.63    0.35
  -5   8   9    0.41    0.42
  -4   8   9    2.09    0.39
  -4   8   9    2.96    0.40
   3  -8  -9   28.50    1.34
  -3   8   9   30.45    1.44
  -3   8   9   29.72    1.28
   2  -8  -9   25.01    1.19
  -2   8   9   24.20    1.19
   1  -8  -9    0.42    0.29
  -1   8   9    0.49    0.20
   0  -8  -9   20.21    1.14
   0   8   9   20.81    1.15
   0   8   9   20.07    0.96
  -1  -8  -9    0.71    0.35
   1   8   9   -0.31    0.35
   1   8   9    0.08    0.21
  -2  -8  -9   13.61    1.01
   2   8   9   10.49    0.88
   2   8   9   11.43    0.73
  -3  -8  -9   19.04    1.30
   3   8   9   16.54    1.26
  -4  -8  -9    0.90    0.53
   4   8   9    0.67    0.53
  -5   9   9   -0.60    0.43
  -5   9   9   -0.35    0.41
  -4   9   9    0.92    0.35
  -4   9   9    2.11    0.37
  -3   9   9   18.98    1.07
   2  -9  -9    3.42    0.44
  -2   9   9    4.44    0.51
   1  -9  -9    4.53    0.58
  -1   9   9    4.70    0.46
   0   9   9    1.06    0.28
  -1  -9  -9    7.74    0.84
   1   9   9    9.17    0.62
  -2  -9  -9    1.91    0.53
   2   9   9    1.64    0.37
   2   9   9    0.89    0.47
  -3  -9  -9   -0.37    0.55
   3   9   9    0.21    0.53
  -5  10   9    2.43    0.48
  -4  10   9    3.15    0.51
  -3  10   9   25.31    1.34
   2 -10  -9    1.35    0.44
  -2  10   9    1.05    0.33
   1 -10  -9    6.56    0.75
  -1  10   9    6.46    0.57
   0 -10  -9    1.56    0.50
   0  10   9    1.43    0.30
  -1 -10  -9    0.89    0.48
   1  10   9    0.66    0.31
  -2 -10  -9    2.80    0.54
   2  10   9    2.01    0.42
  -4  11   9    2.50    0.54
  -3  11   9    1.24    0.40
   2 -11  -9    9.47    0.87
  -2  11   9    8.80    0.73
   1 -11  -9    4.61    0.62
  -1  11   9    4.57    0.57
   0 -11  -9    0.18    0.47
   0  11   9    0.27    0.31
  -1 -11  -9    3.35    0.69
   1  11   9    5.59    0.68
  -3  12   9    6.02    0.74
  -2  12   9    5.77    0.71
   1 -12  -9    9.70    0.99
  -1  12   9    9.10    0.76
   0 -12  -9    1.12    0.58
   0  12   9    1.10    0.39
   0  16 -10    8.65    0.70
   0  16 -10    6.03    0.88
   0 -16  10    7.85    1.02
  -1  16 -10    3.75    0.53
  -1  16 -10    2.86    0.53
   1 -16  10    2.77    0.67
  -2  16 -10    0.43    0.33
  -2  16 -10   -0.80    0.40
   2 -16  10    0.03    0.59
   2  15 -10   15.20    1.23
   2  15 -10   11.50    1.01
  -2 -15  10   14.54    1.20
   1  15 -10    4.06    0.68
   1  15 -10    3.05    0.45
  -1 -15  10    2.67    0.61
   0  15 -10    2.14    0.46
   0  15 -10    1.69    0.36
   0 -15  10    2.77    0.57
  -1  15 -10   -0.13    0.35
  -1  15 -10    0.77    0.29
   1 -15  10   -0.10    0.48
  -2  15 -10   13.93    0.83
  -2  15 -10   13.49    0.97
   2 -15  10   16.35    1.23
  -3  15 -10    3.88    0.52
  -3  15 -10    3.80    0.53
   3 -15  10    3.71    0.69
   3  14 -10    0.08    0.53
   3  14 -10   -0.20    0.44
  -3 -14  10    0.51    0.52
   2  14 -10    1.08    0.48
   2  14 -10    0.57    0.39
  -2 -14  10    0.06    0.50
   1  14 -10    1.16    0.32
   1  14 -10    0.29    0.42
  -1 -14  10    0.71    0.45
   0  14 -10   -0.15    0.27
   0  14 -10   -0.43    0.36
   0 -14  10    0.43    0.42
  -1  14 -10    3.14    0.44
  -1  14 -10    2.65    0.43
   1 -14  10    2.40    0.51
  -2  14 -10    1.96    0.39
  -2  14 -10    2.99    0.42
   2 -14  10    1.39    0.51
  -3  14 -10    3.07    0.39
  -3  14 -10    4.76    0.57
   3 -14  10    3.27    0.63
  -4  14 -10   10.35    0.72
  -4  14 -10   11.38    0.76
   4 -14  10    8.20    1.16
   3  13 -10    6.81    0.74
   3  13 -10    5.99    0.79
  -3 -13  10    6.24    0.87
   2  13 -10   14.39    0.98
   2  13 -10   11.62    0.83
  -2 -13  10   13.70    1.05
   1  13 -10   19.91    1.04
   1  13 -10   19.46    1.21
  -1 -13  10   20.91    1.29
   0  13 -10    0.33    0.30
   0  13 -10    0.50    0.23
   0 -13  10    0.54    0.41
  -1  13 -10    0.98    0.53
  -1  13 -10    1.81    0.29
   1 -13  10    1.16    0.44
  -2  13 -10    1.59    0.29
  -2  13 -10    0.97    0.31
   2 -13  10    1.37    0.48
  -3  13 -10   10.34    0.67
  -3  13 -10   11.15    0.73
   3 -13  10   11.36    1.01
  -4  13 -10   12.62    0.91
  -4  13 -10   11.71    0.79
   4 -13  10   13.66    1.13
  -5  13 -10   10.44    0.76
   5 -13  10    7.68    1.12
   4  12 -10    5.82    0.80
   4  12 -10    5.26    0.84
  -4 -12  10    7.20    0.82
   3  12 -10    0.64    0.35
   3  12 -10   -0.41    0.45
  -3 -12  10   -0.17    0.38
   2  12 -10    3.86    0.52
   2  12 -10    4.76    0.67
  -2 -12  10    4.58    0.64
   1  12 -10    4.32    0.52
   1  12 -10    4.41    0.47
  -1 -12  10    3.94    0.60
   0  12 -10    1.56    0.33
   0  12 -10    1.89    0.30
   0 -12  10    1.86    0.45
  -1  12 -10    0.94    0.21
  -1  12 -10    0.39    0.25
   1 -12  10    0.52    0.35
  -2  12 -10    0.02    0.19
  -2  12 -10    0.12    0.23
   2 -12  10   -0.45    0.33
  -3  12 -10   18.97    0.96
  -3  12 -10   19.19    0.96
   3 -12  10   18.00    1.23
  -4  12 -10    0.39    0.25
  -4  12 -10    0.40    0.26
   4 -12  10    0.72    0.50
  -5  12 -10   -0.51    0.28
   5 -12  10    0.28    0.55
   5  11 -10    3.79    0.61
   5  11 -10    2.74    0.62
  -5 -11  10    2.26    0.56
  -5 -11  10    2.80    0.63
   4  11 -10    9.03    0.84
   4  11 -10    9.05    1.03
  -4 -11  10    9.30    0.84
   3  11 -10    0.31    0.38
   3  11 -10    1.01    0.31
  -3 -11  10    0.74    0.35
   2  11 -10   26.89    1.41
   2  11 -10   24.82    1.22
  -2 -11  10   25.53    1.35
   1  11 -10    1.00    0.23
   1  11 -10    1.20    0.33
   0  11 -10    3.16    0.45
   0  11 -10    2.95    0.35
   0 -11  10    2.60    0.43
  -1  11 -10    9.65    0.59
  -1  11 -10    9.78    0.65
   1 -11  10   11.02    0.84
  -2  11 -10    0.01    0.20
  -2  11 -10    0.50    0.32
  -3  11 -10    3.40    0.39
  -3  11 -10    2.61    0.37
   3 -11  10    3.08    0.55
  -4  11 -10   16.12    0.87
  -4  11 -10   15.30    0.79
   4 -11  10   16.14    1.14
  -5  11 -10    9.16    0.67
   5 -11  10    7.03    1.06
  -6  11 -10    0.03    0.30
   6 -11  10   -0.27    0.62
   5  10 -10    5.20    0.80
   5  10 -10    6.52    0.84
  -5 -10  10    5.95    0.89
  -5 -10  10    6.64    0.78
   4  10 -10    0.83    0.37
   4  10 -10    0.05    0.47
  -4 -10  10    1.75    0.41
  -4 -10  10    0.08    0.52
   3  10 -10    1.01    0.42
   3  10 -10    2.04    0.36
   2  10 -10    9.05    0.64
   2  10 -10    9.51    0.72
  -2 -10  10    8.98    0.70
   1  10 -10    0.32    0.18
   1  10 -10   -0.17    0.24
  -1 -10  10    0.19    0.25
   0  10 -10    8.26    0.59
   0  10 -10    8.86    0.53
   0 -10  10    7.87    0.70
  -1  10 -10    2.37    0.30
  -1  10 -10    2.31    0.35
   1 -10  10    2.24    0.41
  -2  10 -10   49.59    1.92
  -2  10 -10   45.57    1.89
   2 -10  10   47.44    2.18
  -3  10 -10    1.39    0.22
  -3  10 -10    0.91    0.20
   3 -10  10    0.77    0.34
  -4  10 -10   -0.02    0.18
  -4  10 -10    0.39    0.18
   4 -10  10   -0.77    0.39
  -5  10 -10   -0.28    0.26
   5 -10  10    0.61    0.49
  -6  10 -10    0.14    0.32
   6 -10  10    0.37    0.56
   5   9 -10    1.63    0.57
   5   9 -10    2.74    0.53
  -5  -9  10    2.93    0.64
  -5  -9  10    2.71    0.47
   4   9 -10    0.93    0.43
   4   9 -10    0.71    0.35
  -4  -9  10    0.59    0.42
  -4  -9  10    1.29    0.36
   3   9 -10    7.29    0.80
  -3  -9  10    6.65    0.63
   2   9 -10   14.25    0.93
   2   9 -10   15.88    0.84
  -2  -9  10   15.46    0.93
   1   9 -10    2.97    0.34
   1   9 -10    3.16    0.42
  -1  -9  10    3.34    0.48
   0   9 -10   11.37    0.62
   0   9 -10   11.67    0.69
   0  -9  10   12.22    0.79
  -1   9 -10   64.78    2.56
  -1   9 -10   68.76    2.55
   1  -9  10   66.01    2.79
  -2   9 -10    6.46    0.44
  -2   9 -10    6.06    0.42
   2  -9  10    6.26    0.68
  -3   9 -10    4.44    0.34
  -3   9 -10    5.19    0.41
   3  -9  10    4.15    0.62
  -4   9 -10    1.11    0.24
  -4   9 -10    1.09    0.18
  -5   9 -10   13.07    0.78
   5  -9  10   12.59    1.08
  -6   9 -10    0.29    0.34
   6  -9  10   -0.53    0.56
   6   8 -10    3.12    0.60
   6   8 -10    3.60    0.78
  -6  -8  10    2.11    0.74
   5   8 -10    6.49    0.78
   5   8 -10    6.56    0.83
  -5  -8  10    6.57    0.87
  -5  -8  10    8.05    0.71
   4   8 -10    0.55    0.37
   4   8 -10    1.15    0.36
  -4  -8  10    1.25    0.39
  -4  -8  10    1.21    0.32
   3   8 -10    0.18    0.21
   3   8 -10    0.17    0.32
  -3  -8  10    0.09    0.25
   2   8 -10    5.44    0.56
   2   8 -10    6.07    0.45
  -2  -8  10    6.08    0.55
   1   8 -10   40.40    1.76
   1   8 -10   41.24    1.69
  -1  -8  10   41.60    1.83
   0   8 -10  109.37    4.15
   0   8 -10  111.70    4.10
   0  -8  10  112.94    4.32
  -1   8 -10  197.25    7.27
  -1   8 -10  204.69    7.27
   1  -8  10  205.82    7.54
  -2   8 -10   25.88    1.11
  -2   8 -10   26.22    1.08
   2  -8  10   24.86    1.34
  -3   8 -10   -0.03    0.13
  -3   8 -10   -0.02    0.14
   3  -8  10   -0.22    0.32
  -4   8 -10    1.83    0.24
  -4   8 -10    1.47    0.31
   4  -8  10    1.93    0.44
  -5   8 -10   25.69    1.20
   5  -8  10   23.08    1.42
  -6   8 -10    0.86    0.31
   6  -8  10    0.80    0.52
   6   7 -10    1.18    0.64
   6   7 -10    0.89    0.47
  -6  -7  10    1.62    0.65
   5   7 -10    5.21    0.78
   5   7 -10    5.69    0.66
  -5  -7  10    5.98    0.74
  -5  -7  10    5.14    0.61
   4   7 -10    9.05    0.84
   4   7 -10    9.19    0.69
  -4  -7  10    9.81    0.86
  -4  -7  10    8.48    0.67
   3   7 -10    5.47    0.55
   3   7 -10    6.24    0.52
  -3  -7  10    5.66    0.59
  -3  -7  10    5.70    0.52
   2   7 -10    5.59    0.55
   2   7 -10    5.81    0.46
  -2  -7  10    6.10    0.53
   1   7 -10    6.47    0.44
   1   7 -10    6.87    0.50
  -1  -7  10    6.71    0.55
   0   7 -10   10.25    0.58
   0   7 -10    9.87    0.53
   0  -7  10   10.13    0.68
  -1   7 -10    2.37    0.27
  -1   7 -10    2.45    0.26
   1  -7  10    2.25    0.29
   1  -7  10    2.77    0.41
  -2   7 -10    0.54    0.16
  -2   7 -10    0.22    0.13
   2  -7  10    0.71    0.19
   2  -7  10    0.51    0.24
  -3   7 -10   14.97    0.76
  -3   7 -10   16.14    0.68
   3  -7  10   16.16    0.76
   3  -7  10   14.35    0.98
  -4   7 -10   26.76    1.24
  -4   7 -10   28.54    1.10
   4  -7  10   29.24    1.51
  -5   7 -10    4.42    0.46
   5  -7  10    4.62    0.63
  -6   7 -10    1.07    0.31
   6  -7  10    0.71    0.53
   6   6 -10    9.88    0.93
  -6  -6  10    7.43    1.06
   5   6 -10    4.72    0.71
   5   6 -10    3.96    0.53
  -5  -6  10    3.26    0.50
  -5  -6  10    3.74    0.56
   4   6 -10    4.75    0.56
   4   6 -10    4.03    0.62
  -4  -6  10    3.85    0.56
  -4  -6  10    4.10    0.48
   3   6 -10   -0.15    0.26
   3   6 -10   -0.40    0.19
  -3  -6  10    0.25    0.20
  -3  -6  10    0.01    0.24
   2   6 -10   -0.16    0.15
   2   6 -10   -0.20    0.20
  -2  -6  10    0.03    0.22
  -2  -6  10    0.15    0.20
   1   6 -10    2.88    0.27
   1   6 -10    2.71    0.35
  -1  -6  10    2.68    0.38
   0   6 -10    0.08    0.11
   0   6 -10    0.00    0.14
   0  -6  10    0.06    0.15
   0  -6  10   -0.08    0.17
  -1   6 -10    1.50    0.22
  -1   6 -10    1.56    0.21
   1  -6  10    1.51    0.22
   1  -6  10    1.76    0.30
[truncated: 3,439,074 more chars]
